# Supplementary material for: Prevalence of Trypanosoma and Sodalis in Wild Populations of Tsetse Flies: Impact on Sit Programmes for Tsetse Eradication
Source: Research Square preprint supplement (doi:10.21203/rs.3.rs-1136039/v1), 2021-12-14
Supplement: Supplementary file 1 [file 3b6f6c5d4f8b49f5c67c7394.xlsx]

## Sheet: Geographic coordinates 
Supplementary table 1. Geographical coordinates of firld collected tsetse samples.
Glossina species	Country (area)	Latitude	Longitude
G. tachinoides	Burkina Faso (Folonzo)	9.92968	-4.60802
	Burkina Faso (Sissili)	11.0945	-2.09818
	Burkina Faso (Comoe)	9.89107	-4.58976
	Burkina Faso (Arly)	11.6129	-1.2891
	Ghana (Bougouhiba)	10.2389	-0.719172
	Ghana (Walewale)	10.3516	-0.79846
	Ghana (Mortani)	10.2348	-0.714119
	Ghana (Fumbissi)	10.4728	-1.38683
	Ghana (Sissili Bridge)	10.3304	-1.31921
	Ghana (Grogro)	10.0822	-1.88313
	Ghana(Kumpole)	10.2543	-1.27018
	Ghana (Nabogo)	9.69263	-0.979002
	Ghana (Psikp)	10.4447	-1.08151
G.p. gambiense	Burkina Faso (Kenedougou)	10.9817	-4.80305
	Burkina Faso (Moussodougou)	10.8333	-4.95
	Burkina Faso (Folonzo)	9.92968	-4.60802
	Burkina Faso (Comoe)	9.89107	-4.58976
	Burkina Faso (Kartasso)	11.1418	-5.25303
	Burkina Faso (Bama)	12.0333	-4.4
	Guinea (Kangoliya)	9.96084	-13.6558
	Guinea (Dekonkore)	9.85	-10.0167
	Guinea (Bafing)	11.4134	-11.2785
	Guinea (Lemonako)	11.7333	-11.5667
	Guinea (Kerfala)	11.344	-9.46119
	Guinea (Mimi)	10.4004	-9.05308
	Mali (Baoule)	12.88	-8.62
	Mali (Banko)	12.1	-6.51667
	Mali (Siby)	12.3777	-8.32664
	Mali (Systeme Senegal)	13.4166	-11.1037
	Mali (Systeme Niger)	14.4663	-4.20195
	Mali (Bani)	14.4663	-4.20195
	Mali (Bougouni)	11.4167	-7.48333
	Mali (Sikasso)	11.3167	-5.66667
	Mali (Kita)	13.0411	-9.48472
	Mali (Baguineda)	12.6153	-7.77667
	Senegal (Tambacounda)	13.7769	-13.6672
	Senegal (Fleuve Gambi)	12.8467	-12.3581
	Senegal (Mako)	12.8543	-13.2734
	Senegal (Niokolo)	13.0656	-13.1696
	Senegal (Fleuve Gambi)	12.8467	-12.3581
	Senegal (Diaguiri)	12.6293	-12.0914
	Senegal (Moussalla)	13.6935	-12.0735
	Senegal (Pout 1)	14.7818	-17.0626
	Senegal (Pout 2)	14.7939	-17.0717
	Senegal (Hann)	14.7257	-17.4359
G.m. submorsitans	Burkina Faso (Folonzo)	9.92968	-4.60802
	Burkina Faso (Sissili)	11.0945	-2.09818
	Burkina Faso (Comoe)	9.89107	-4.58976
G. medicorum	Burkina Faso (Comoe)	9.89107	-4.58976
	Burkina Faso (Folonzo)	9.92968	-4.60802
G. pallidipes	Ethiopia (Arba mich)	6.11667	37.0333
	Kenya (Meru nat. parc 1)	0.03404	38.054
	Kenya (Meru nat. parc 2)	0.11329	38.1209
	Kenya (Kiria)	0.30837	38.1926
	Kenya (Ruma Nat. park)	0.646151	34.2757
	Kenya (Mwea nat. Parc)	0.826	37.623
	Kenya (Katotoi)	0.713189	34.3136
	Kenya (Mwea)	0.672916	37.4029
	Kenya (Koibos 1)	0.18337	36.1102
	Kenya (Koibos 2)	0.19128	36.1226
	Kenya (Emsos 1)	0.16579	36.1056
	Kenya (Emsos 2)	0.16669	36.1058
	Tanzania (Kwekivu 1)	-5.74842	37.3821
	Zambia (Mfuwe)	-13.1279	31.776
	Zimbabwe (Rukomeshi)	-16.1333	29.4
	Zimbabwe (Mushumbi)	-16.1703	30.5667
	Zimbabwe (Gokwe)	-18.2167	28.9333
	Zimbabwe (Makuti)	-16.3	29.25
G.m.morsitans	Tanzania (Kwekivu 2)	-5.74197	37.8765
	Zambia (Mfuwe)	-13.1279	31.776
	Zimbabwe (Rukomeshi)	-16.1333	29.4
	Zimbabwe (Mushumbi)	-16.1703	30.5667
	Zimbabwe (Gokwe)	-18.2167	28.9333
	Zimbabwe (Makuti)	-16.3	29.25
G. brevipalpis	South Africa (Phinda 1)	-27.826	32.2863
	South Africa (Phinda 2)	-27.7793	32.3426
	South Africa (Phinda 3)	-27.7772	32.3477
	South Africa (Saint Lucia 1)	-28.2685	32.4768
	South Africa (Saint Lucia 2)	-28.2661	32.4834
	South Africa (Saint Lucia 3)	-28.2752	32.4849
	South Africa (Hluhluwe 1)	-28.0982	32.1223
	South Africa (Hluhluwe 2)	-28.1003	32.1225
	South Africa (Hluhluwe 3)	-28.1037	32.121
	South Africa (Hluhluwe 4)	-28.111	32.118
	South Africa (Hluhluwe 5)	-28.1176	32.1078
	South Africa (Hluhluwe 6)	-28.1089	32.0986
	Mozambique (Reserva Especial de Maputo 1)	-26.6078	32.8438
	Mozambique (Reserva Especial de Maputo 2)	-26.5988	32.8453
	Mozambique (Reserva Especial de Maputo 3)	-26.5557	32.8456
	Mozambique (Reserva Especial de Maputo 4)	-26.5925	32.8462
	Mozambique (Reserva Especial de Maputo 5)	-26.5918	32.8462
	Mozambique (Reserva Especial de Maputo 6)	-26.5896	32.8464
	Mozambique (Reserva Especial de Maputo 7)	-26.5866	32.8466
	Mozambique (Reserva Especial de Maputo 8)	-26.5992	32.8454
	Mozambique (Reserva Especial de Maputo 9)	-26.5985	32.8456
G. austeni	South Africa (Lower Mkhuze 1)	-27.6532	32.4201
	South Africa (Lower Mkhuze 2)	-27.6523	32.4111
	South Africa (Lower Mkhuze 3)	-27.6564	32.4077
	South Africa (Saint Lucia 1)	-28.2685	32.4768
	South Africa (Saint Lucia 2)	-28.2661	32.4834
	South Africa (Saint Lucia 3)	-28.2752	32.4849
	South Africa (False Bay Park 1)	-27.983	32.3553
	South Africa (False Bay Park 2)	-27.9759	32.3636
	South Africa (False Bay Park 3)	-27.9658	32.3747
	Mozambique (Reserva Especial de Maputo 1)	-26.6078	32.8438
	Mozambique (Reserva Especial de Maputo 2)	-26.5988	32.8453
	Mozambique (Reserva Especial de Maputo 3)	-26.5557	32.8456
	Mozambique (Reserva Especial de Maputo 4)	-26.5925	32.8462
	Mozambique (Reserva Especial de Maputo 5)	-26.5918	32.8462
	Mozambique (Reserva Especial de Maputo 6)	-26.5896	32.8464
	Mozambique (Reserva Especial de Maputo 7)	-26.5866	32.8466
	Mozambique (Reserva Especial de Maputo 8)	-26.5992	32.8454
	Mozambique (Reserva Especial de Maputo 9)	-26.5985	32.8456
	Swaziland (Mlawula Nature Reserve)	-26.1063	32.0115
