# Supplementary material for: Prevalence of Trypanosoma and Sodalis in Wild Populations of Tsetse Flies: Impact on Sit Programmes for Tsetse Eradication
Source: Research Square preprint supplement (doi:10.21203/rs.3.rs-1136039/v1), 2021-12-14
Supplement: Supplementary file 2 [file 42ac923eae95de2365f4893a.docx]

**Supplementary Table 2.** List of Primers used for PCR and quantitative PCR (qPCR) analyses of microbiome in *Glossina* species

| **Target Gene** | **Primer Name** | **Primer Sequence (Listed 5’- to -3’)** | **Annealing Temperature (°C)** | **Amplicon Size (bp)** | **References** |
| --- | --- | --- | --- | --- | --- |
| fliC (flagellin) (Sodalis) | sod-FliCF | GCA GTT TCA GGA TAC CC | 52.5 | 508 | 1 |
| sod-FliCR | GGC GGA AAA TGG TAT AG |
| GpCAG133 | GpCAG133-F | ATT TTT GCG TCA ACG TGA | 52.5 | 185-205 | 2 |
| GpCAG133-R | ATG AGG ATG TTG TCC AGT TT |
| fliC (flagellin) (Sodalis) | sodqPCR-FliCF | GAA GCC ACC GAT CCT GTA AC | 55 | 508 | 3 |
| sodqPCR-FliCR | CAT CTT TGC CCG TAG AAA TCA C |
| ITS 1 | ITS 1-CF | CCG GAA GTT CAC CGA TAT TG | 60 | 250-710 | 4 |
| ITS 1-BR | TTG CTG CGT TCT TCA ACG AA |
| 18S rDNA Trypanosomatidae | 18S_Typ_F | CGCCAAGCTAATACATGAACCAA | 60 | 106 | 5 |
| 18S_Tryp_R | TAATTTCATTCATTCGCTGGACG |

**Reference list**

1. Toh, H. *et al.* Massive genome erosion and functional adaptations provide insights into the symbiotic lifestyle of Sodalis glossinidius in the tsetse host. *Genome Res.* **16**, 149–156 (2006).

2. Baker, M. D. & Krafsur, E. S. Identification and properties of microsatellite markers in tsetse flies *Glossina morsitans* sensu lato (Diptera: Glossinidae). *Mol. Ecol. Notes* **1**, 234–236 (2001).

3. Weiss, B. L., Maltz, M. & Aksoy, S. Obligate symbionts activate immune system development in the tsetse fly. *J Immunol* **188**, 3395–3403 (2012).

4. Njiru, Z. K. *et al.* The use of ITS1 rDNA PCR in detecting pathogenic African trypanosomes. *Parasitol. Res.* **95**, 186–192 (2005).

5. Deborggraeve, S. *et al.* Molecular dipstick test for diagnosis of sleeping sickness. *J. Clin. Microbiol.* **44**, 2884–2889 (2006).

**Supplementary Table 3:** Prevalence of Trypanosome single and multiple infection in tsetse samples analyzed per country

| **Region** | **Country** | **Prevalence of trypanaosome species/subspecies and mixed infection (%)*** | | | | | | | | | | |
| --- | --- | --- | --- | --- | --- | --- | --- | --- | --- | --- | --- | --- |
|  |  | **Tc** | **Tv** | **Tz** | **Tsg** | **TcTv** | **TcTz** | **TcTsg** | **TvTz** | **TvTsg** | **TzTsg** | **TcTvTz** |
| East and south Africa | Ethiopia | 6.10ab | 0.65 ab | 1.09 a | 10.46 ab | 0 ab | 0 ab | 0.65 ab | 0 ab | 0.44 ab | 0.65 | 0.00 |
| Kenya | 13.00 b | 5.65 ac | 0.60 a | 15.87 ab | 2.08 b | 0.50 a | 6.05 b | 0.20 a | 0.10 b | 0.40 | 0.00 |
| Democratic R. of Congo | 0.00 ab | 2.86 ab | 0.00 a | 0.00 ab | 0.00 ab | 0.00 ab | 0.00 ab | 0.00 ab | 0.00 ab | 0.00 | 0.00 |
| Mozambique | 3.00 a | 1.00 acd | 0.00 a | 3.00 ab | 0.00 a | 0.00 ab | 0.00 a | 0.00 a | 1.00 ab | 0.00 | 0.00 |
| South Africa | 3.99 a | 0.57 bc | 3.04 a | 7.03 ab | 0.19 a | 0.00 a | 0.38 a | 0.00 a | 0.00 b | 0.00 | 0.00 |
| Swaziland | 0.00 ab | 0.00 ab | 0.00 a | 0.00 ab | 0.00 ab | 0.00 ab | 0.00 ab | 0.00 ab | 0.00 ab | 0.00 | 0.00 |
| Tanzania | **14.20** b | 2.07 ab | 1.18 a | 10.95 ab | 0.00 a | 0.30 a | 6.21 b | 0.30 a | 1.78 ab | 0.89 | 0.00 |
| Uganda | 2.86 b | 0.95 ab | 0.95 a | 3.81 ab | 0.00 a | 0.00 a | 0.48 a | 0.00 a | 0.00 ab | 0.00 | 0.00 |
| Zambia | 4.76 b | 0.48 abd | 0.95 a | **30.95** ab | 0.00 ab | 0.00 ab | **9.05** b | 0.00 ab | 0.00 ab | 0.00 | 0.00 |
| Zimbabwe | 7.11 b | 0.47 bc | 1.90 a | 39.81 ab | 0.00 a | 0.00 a | 4.27 a | 0.00 a | 0.00 b | 0.00 | 0.00 |
| **Subtotal (Average%)** | **8.38** | **2.43** | **1.25** | **14.13** | **0.70** | **0.19** | **3.71** | **0.10** | **0.32** | **0.32** | **0.00** |
| West Africa | Burkina Faso | 2.55 a | 12.14 a | 2.68 a | 1.41 ac | 0.26 a | 0.53 a | 0.04 a | 0.70 a | 1.19 a | 0.26 | 0.09 |
| Ghana | 1.71 a | **14.10** a | **19.66** b | 0.00 ac | 0.00 a | **10.68** b | 0.00 a | **12.39** b | 0.00 b | 0.00 | 1.71 |
| Guinea | 0.00 a | 2.23 bc | 0.00 a | 0.00 ac | 0.00 a | 0.00 a | 0.00 a | 0.00 a | 0.00 b | 0.00 | 0.00 |
| Mali | 0.27 a | 5.49 ac | 1.10 a | 0.00 ac | 0.00 a | 0.00 a | 0.00 a | 0.00 a | 0.00 b | 0.00 | 0.00 |
| Senegal | 0.55 a | 8.96 acd | 1.28 a | 1.83 ac | 0.00 a | 0.00 a | 0.00 a | 1.65 a | 0.00 b | 0.00 | 0.00 |
|  | **Subtotal (Average%)** | **1.77** | **10.37** | **3.16** | **1.13** | **0.16** | **0.99** | **0.03** | **1.45** | **0.72** | **0.16** | **0.16** |
|  | **Total (Average%)** | **4.78** | **6.75** | **2.29** | **7.06** | **0.41** | **0.63** | **1.71** | **0.83** | **0.54** | **0.23** | **0.09** |

* Tc: *T. congolense* savannah, *T. congolense* Kilifi; *T. congolense* forest, Tsg: *T. simiae*; *T. simiae* Tsavo; *T. godfreyi*, Tv: *T. vivax,* Tz: T*. b. brucei, T. b. gambiense, T. b. rhodensiense, T. evansi*,

**Supplementary Table 4:** Prevalence of Trypanosome single and multiple infection in tsetse samples analyzed per tsetse species

| **Species** | **Prevalence of trypanaosome species/subspecies and mixed infection (%)*** | | | | | | | | | | |
| --- | --- | --- | --- | --- | --- | --- | --- | --- | --- | --- | --- |
| **Tc** | **Tv** | **Tz** | **Tsg** | **TcTv** | **TcTz** | **TcTsg** | **TvTz** | **TvTsg** | **TzTsg** | **TcTvTz** |
| *G. austeni* | 4.91a | 0.87a | 2.60 a | 7.23 a | 0.29 a | 0.29 a | 0.58a | 0.00 a | 0.00 a | 0.00 | 0.00 a |
| *G. brevipalpis* | 2.00a | 0.86ab | 2.29 a | 4.29 ab | 0.00 a | 0.00 a | 0.00 a | 0.00 a | 0.29a | 0.00 | 0.00 a |
| *G. f. fuscipes* | 2.73ab | 4.37ab | 0.55 a | 7.10 ab | 1.09 ab | 0.55 ab | 0.55a | 0.00 ab | 0.00 a | 0.00 | 0.00 a |
| *G. medicorum* | 9.09ab | 11.69ab | 13.64 ab | 0.00 a | 1.30 b | 1.30 ab | 0.00 a | 0.65ab | 0.00 a | 0.00 | 1.30 b |
| *G. m. morsitans* | 9.76ab | 0.54ac | 1.08 ac | 22.76 ae | 0.00 ad | 0.00 a | 5.15a | 0.00 a | 1.36a | 0.27 | 0.00 a |
| *G.m. submorsitans* | 5.25abc | 11.37ab | 0.58 ac | 0.00 ad | 0.00 a | 0.87 ab | 0.00 a | 0.00 ab | 0.00 a | 0.00 | 0.00 a |
| *G. pallidipes* | 10.68b | 3.20a | 0.87 ac | 16.54 b | 1.03 ab | 0.27 a | 5.10b | 0.16a | 0.22a | 0.49 | 0.00 a |
| *G. p. gambiensis* | 0.46ac | 8.86b | 1.89 ac | 1.94 ac | 0.00 ac | 0.09 a | 0.05a | 1.06a | 1.20ab | 0.28 | 0.00 ac |
| *G. p. palpalis* | 0.00 abc | 2.86ab | 0.00 abc | 0.00 abc | 0.00 abcd | 0.00 ab | 0.00 ab | 0.00 a | 0.00 a | 0.00 | 0.00 a |
| *G. tachinoides* | 2.25ac | 12.92bc | 4.96 b | 0.00 ac | 0.37 ae | 2.81 b | 0.00 a | 2.81b | 0.00 ac | 0.00 | 0.37 ad |
| **Total (Average%)** | **4.78** | **6.75** | **2.29** | **7.06** | **0.41** | **0.63** | **1.71** | **0.83** | **0.54** | **0.23** | **0.09** |

* Tc: *T. congolense* savannah, *T. congolense* Kilifi; *T. congolense* forest, Tsg: *T. simiae*; *T. simiae* Tsavo; *T. godfreyi*, Tv: *T. vivax,* Tz: T*. b. brucei, T. b. gambiense, T. b. rhodensiense, T. evansi*,

**Supplementary Table 5**: Prevalence of Trypanosome single and multiple infection in tsetse samples analyzed per tsetse species and per country

| **Species** | **Country** | **Prevalence of trypanaosome species/subspecies and mixed infection (%)*** | | | | | | | | | | |
| --- | --- | --- | --- | --- | --- | --- | --- | --- | --- | --- | --- | --- |
| **Tc** | **Tv** | **Tz** | **Tsg** | **TcTv** | **TcTz** | **TcTsg** | **TvTz** | **TvTsg** | **TzTsg** | **TcTvTz** |
| *G. austeni* | Mozambique | 6.00 | 0.00 | 0.00 | 4.00 | 0.00 | 0.00 | 0.00 | 0.00 | 0.00 | 0.00 | 0.00 |
| South Africa | 6.19 | 0.44 | 3.54 | 10.18 | 0.44 | 0.00 | 0.88 | 0.00 | 0.00 | 0.00 | 0.00 |
| Swaziland | 0.00 | 0.00 | 0.00 | 0.00 | 0.00 | 0.00 | 0.00 | 0.00 | 0.00 | 0.00 | 0.00 |
| Tanzania | 0.00 | 5.00 | 5.00 | 0.00 | 0.00 | 0.00 | 0.00 | 0.00 | 0.00 | 0.00 | 0.00 |
| *G. brevipalpis* | Mozambique | 0.00 | 2.00 | 0.00 a | 2.00 | 0.00 | 0.00 | 0.00 | 0.00 | 2.00 | 0.00 | 0.00 |
| South Africa | 2.33 | 0.67 | 2.67 b | 4.67 | 0.00 | 0.00 | 0.00 | 0.00 | 0.00 | 0.00 | 0.00 |
| *G. f. fuscipes* | Kenya | 2.25 | 6.74 | 0.00 a | **11.24** | 2.25 | 1.12 | 0.00 a | 0.00 | 0.00 | 0.00 | 0.00 |
| Uganda | 3.19 | 2.13 | 1.06 b | 3.19 | 0.00 | 0.00 | 1.06 b | 0.00 | 0.00 | 0.00 | 0.00 |
| *G. medicorum* | Burkina Faso | 9.09 | **11.69** | **13.64** a | 0.00 | 1.30 | 1.30 | 0.00 a | 0.65 | 0.00 | 0.00 | 1.30 |
| *G. m. morsitans* | Kenya | 2.35 | 0.00 | 0.00 | 0.00 | 0.00 | 0.00 | 0.00 | 0.00 | 0.00 a | 0.00 | 0.00 |
| Tanzania | **18.52** | 1.23 | 1.23 | **18.52** | 0.00 | 0.00 | **6.17** | 0.00 | **6.17** b | 1.23 b | 0.00 |
| Zambia | **12.5** | 0.00 | 1.56 | **21.88** | 0.00 | 0.00 | **12.5** | 0.00 | 0.00 a | 0.00 a | 0.00 |
| Zimbabwe | 7.91 | 0.72 | 1.44 | **39.57** | 0.00 | 0.00 | 4.32 | 0.00 | 0.00 a | 0.00 a | 0.00 |
| *G.m. submorsitans* | Burkina Faso | 5.25 | **11.37** | 0.58 | 0.00 | 0.00 | 0.87 | 0.00 | 0.00 | 0.00 | 0.00 | 0.00 |
| *G. pallidipes* | Ethiopia | 6.10 | 0.65 a | 1.09 | **10.46** | 0.00 | 0.00 | 0.65 | 0.00 a | 0.44 | 0.65 | 0.00 |
| Kenya | **15.23** | 6.12 ab | 0.72 | **17.99** | 2.28 | 0.48 | 7.31 | 0.24 a | 0.12 | 0.48 | 0.00 |
| Tanzania | **15.21** | 1.84 a | 0.46 | **10.14** | 0.00 | 0.46 | 7.37 | 0.46 ab | 0.46 | 0.92 | 0.00 |
| Uganda | 2.59 | 0.00 ac | 0.86 | 4.31 | 0.00 | 0.00 | 0.00 | 0.00 ac | 0.00 | 0.00 | 0.00 |
| Zambia | 1.37 | 0.68 a | 0.68 | **34.93** | 0.00 | 0.00 | 7.53 | 0.00 a | 0.00 | 0.00 | 0.00 |
| Zimbabwe | 5.56 | 0.00 ac | 2.78 | **40.28** | 0.00 | 0.00 | 4.17 | 0.00 ab | 0.00 | 0.00 | 0.00 |
| *G.p. palpalis* | Democratic R. of Congo | 0.00 | 2.86 | 0.00 | 0.00 | 0.00 | 0.00 | 0.00 | 0.00 | 0.00 | 0.00 | 0.00 |

**Supplementary Table 5 cont.**: Prevalence of Trypanosome single and multiple infection in tsetse samples analyzed per tsetse species and per country

| **Species** | **Country** | **Prevalence of trypanaosome species/subspecies and mixed infection (%)*** | | | | | | | | | | |
| --- | --- | --- | --- | --- | --- | --- | --- | --- | --- | --- | --- | --- |
| **Tc** | **Tv** | **Tz** | **Tsg** | **TcTv** | **TcTz** | **TcTsg** | **TvTz** | **TvTsg** | **TzTsg** | **TcTvTz** |
| *G. p. gambiensis* | Burkina Faso | 0.64 | 12.09 a | 3.50 | 3.39 a | 0.00 | 0.21 | 0.11 | 1.48 | 2.86 a | 0.64 | 0.00 |
| Guinea | 0.00 | 2.23 b | 0.00 | 0.00 b | 0.00 | 0.00 | 0.00 | 0.00 | 0.00 b | 0.00 | 0.00 |
| Mali | 0.27 | 5.49 ab | 1.10 | 0.00 b | 0.00 | 0.00 | 0.00 | 0.00 | 0.00 b | 0.00 | 0.00 |
| Senegal | 0.55 | 8.96 a | 1.28 | 1.83 b | 0.00 | 0.00 | 0.00 | 1.65 | 0.00 b | 0.00 | 0.00 |
| *G. tachinoides* | Burkina Faso | 2.40 a | **12.59** | 0.60 | 0.00 | 0.48 a | 0.60 | 0.00 | 0.12 | 0.00 | 0.00 | 0.00 |
| Ghana | 1.71 b | **14.10** | **19.66** | 0.00 | 0.00 b | **10.68** | 0.00 | **12.39** | 0.00 | 0.00 | 1.71 |
| **Total (Average%)** |  | **4.78** | **6.75** | **2.29** | **7.06** | **0.41** | **0.63** | **1.71** | **0.83** | **0.54** | **0.23** | **0.09** |

* Tc: *T. congolense* savannah, *T. congolense* Kilifi; *T. congolense* forest, Tsg: *T. simiae*; *T. simiae* Tsavo; *T. godfreyi*, Tv: *T. vivax,* Tz: T*. b. brucei, T. b. gambiense, T. b. rhodensiense, T. evansi*,
