# Supplementary material for: Prevalence of Trypanosoma and Sodalis in Wild Populations of Tsetse Flies: Impact on Sit Programmes for Tsetse Eradication
Source: Research Square preprint supplement (doi:10.21203/rs.3.rs-1136039/v1), 2021-12-14
Supplement: Supplementary file 5 [file c89789b5e8a49ca0227734bf.xlsx]

## Sheet: Chi squared by taxon
Supplementary table 6a : Chi squared analysis by taxon of coinfection of Sodalis and trypanosome in wild tsetse species
			Observed				Expected
Glossina species	Country (Area, Collection Date)	N	S+/T+	S+/T-	S-/T+	S-/T-	S+/T+	S+/T-	S-/T+	S-/T-	χ2	P			Benjamini-Hochberg
G. austeni	Tanzania (Jozani, 1997)	4	0	0	1	3	0	0	1	3				Q	0.1
G. austeni	Tanzania (Zanzibar, 1995)	6	0	1	0	5	0	1	0	5					P	B-H	sig.
G. austeni	Tanzania (Uguja Island, 1995)	30	0	2	3	25	0.2	1.8	2.8	25.2				1	4.6279e-07	0.0125	*
G. austeni	South Africa (North eastern Kwazulu Natal, 1999)	39	0	2	2	35	0.102564	1.89744	1.89744	35.1026				2	2.14364e-05	0.025	*
G. austeni	South Africa (Lower Mkuze, 2018)	53	0	0	23	30	0	0	23	30				3	0.0186415	0.0375	*
G. austeni	South Africa (Saint Lucia, 2018)	57	0	0	22	35	0	0	22	35				4	0.180128	0.05
G. austeni	South Africa (False Bay Park, 2018)	77	0	0	2	75	0	0	2	75				5	0.210339	0.0625
G. austeni	South Mozambique (Reserva Especial de Maputo, 2019)	50	0	0	5	45	0	0	5	45				6	0.312114	0.075
G. austeni	Eswatini (Mlawula Nature Reserve , 2019)	30	0	0	0	30	0	0	0	30				7	0.585392	0.0875
		346	0	5	58	283	0.83815	4.16185	57.1618	283.838	1.02171	0.312114		8	0.638062	0.1
G. brevipalpis	South Africa (North eastern Kwazulu Natal , 1995)	50	0	0	2	48	0	0	2	48
G. brevipalpis	South Africa (Phinda, 2018)	170	0	7	0	163	0	7	0	163
G. brevipalpis	South Africa (Saint Lucia, 2018)	30	0	0	13	17	0	0	13	17
G. brevipalpis	South Africa (Hluhluwe, 2018)	50	0	0	16	34	0	0	16	34
G. brevipalpis	South Mozambique (Reserva Especial de Maputo, 2019)	50	0	7	3	40	0.42	6.58	2.58	40.42
		350	0	14	34	302	1.36	12.64	32.64	303.36	1.56909	0.210339
G. f. fuscipes	Uganda (Buvuma island, 1994)	94	0	4	10	80	0.425532	3.57447	9.57447	80.4255
G. f. fuscipes	Kenya (Ikapolock, 2007)	51	5	15	14	17	7.45098	12.549	11.549	19.451
G. f. fuscipes	Kenya (Obekai, 2007)	38	0	0	2	36	0	0	2	36
		183	5	19	26	133	4.06557	19.9344	26.9344	132.066	0.297598	0.585392
G. medicorum	Burkina Faso (Comoe, 2008)	94	0	8	32	54	2.7234	5.2766	29.2766	56.7234
G. medicorum	Burkina Faso (Folonzo, 2008)	60	0	0	29	31	0	0	29	31
		154	0	8	61	85	3.16883	4.83117	57.8312	88.1688	5.53484	0.0186415
G. m. submorsitans	Burkina Faso (Comoe, 2007)	206	0	0	20	186	0	0	20	186
G. m. submorsitans	Burkina Faso (Folonzo, 2008)	134	0	1	42	91	0.313433	0.686567	41.6866	91.3134
G. m. submorsitans	Burkina Faso (Sissili, 2008)	3	0	0	0	3	0	0	0	3
		343	0	1	62	280	0.180758	0.819242	61.8192	280.181	0.221286	0.638062
G. p. palpalis	Democratic Republic of Congo (Zaire, 1995)	35	0	4	1	30	0.114286	3.88571	0.885714	30.1143
G. m. morsitans	Tanzania (Masang-tanga, 2005)	81	35	27	9	10	33.679	28.321	10.321	8.67901
G. m. morsitans	Zambia (MFWE, Eastern Zambia, 2007)	64	1	7	30	26	3.875	4.125	27.125	28.875
G. m. morsitans	Zimbabwe (Mukondore, 2007)	13	1	2	0	10	0.230769	2.76923	0.769231	9.23077
G. m. morsitans	Zimbabwe (M. chiuyi, 2007)	9	0	1	0	8	0	1	0	8
G. m. morsitans	Zimbabwe (Rukomeshi, 2006)	15	0	3	0	12	0	3	0	12
G. m. morsitans	Zimbabwe (Kemukura, NA)	18	0	4	1	13	0.222222	3.77778	0.777778	13.2222
G. m. morsitans	Zimbabwe (Mushumashi, 2006)	6	0	0	2	4	0	0	2	4
G. m. morsitans	Zimbabwe (Makuti, 2006)	78	19	2	52	5	19.1154	1.88462	51.8846	5.11538
G. m. morsitans	Kenya (Kari, 2006)	85	2	52	0	31	1.27059	52.7294	0.729412	30.2706
		369	58	98	94	119	64.2602	91.7398	87.7398	125.26	1.79656	0.180128
G. pallidipes	Zambia (MFWE, Eastern Zambia, 2007)	146	2	1	64	79	1.35616	1.64384	64.6438	78.3562
G. pallidipes	Kenya (Mwea, Katotoi, Emsos, Kari, Kiria, Koibos,Meru and Ruma national park, 2007)	834	88	126	337	283	109.053	104.947	315.947	304.053
G. pallidipes	Ethiopia (Arba Minch, 2007)	459	15	79	77	288	18.841	75.159	73.159	291.841
G. pallidipes	Tanzania (Masang-Tanga, 2005)	217	54	108	27	28	60.47	101.53	20.53	34.47
G. pallidipes	Zimbabwe (Mushumashi, 2006)	26	1	0	4	21	0.192308	0.807692	4.80769	20.1923
G. pallidipes	Zimbabwe (Cokwe, 2006)	4	0	0	0	4	0	0	0	4
G. pallidipes	Zimbabwe (Rukomeshi, 2006)	4	0	0	0	4	0	0	0	4
G. pallidipes	Zimbabwe (Makuti, 2006)	38	6	0	27	5	5.21053	0.789474	27.7895	4.21053
G. pallidipes	Uganda (Lira,Omogo, Budaka, Moyo, NA)	116	4	83	5	24	6.75	80.25	2.25	26.75
		1844	170	397	541	736	218.621	348.379	492.379	784.621	25.413	4.6279e-07
G. p. gambiensis	Burkina Faso (Lorepeni)	10	0	0	8	2	0	0	8	2
G. p. gambiensis	Burkina Faso (Bouroum bouroum)	18	0	0	16	2	0	0	16	2
G. p. gambiensis	Burkina Faso (Kourignon)	24	0	0	10	14	0	0	10	14
G. p. gambiensis	Burkina Faso (Kampty)	98	0	0	85	13	0	0	85	13
G. p. gambiensis	Burkina Faso (Ouarkoye)	5	0	0	5	0	0	0	5	0
G. p. gambiensis	Burkina Faso (Dedougou)	57	0	0	33	24	0	0	33	24
G. p. gambiensis	Burkina Faso (Bama)	77	0	0	0	77	0	0	0	77
G. p. gambiensis	Burkina Faso (Comoe)	123	0	0	3	120	0	0	3	120
G. p. gambiensis	Burkina Faso (Folonzo)	212	0	2	25	185	0.235849	1.76415	24.7642	185.236
G. p. gambiensis	Burkina Faso (Kartasso)	136	0	0	0	136	0	0	0	136
G. p. gambiensis	Burkina Faso (Kenedougou)	41	0	0	0	41	0	0	0	41
G. p. gambiensis	Burkina Faso (Mossoudogou)	142	0	0	49	93	0	0	49	93
G. p. gambiensis	Guinea (Bafing)	33	0	0	1	32	0	0	1	32
G. p. gambiensis	Guinea (Dekonkore)	16	0	0	1	15	0	0	1	15
G. p. gambiensis	Guinea (Kangoliya	126	0	90	0	36	0	90	0	36
G. p. gambiensis	Guinea (Karifale)	13	0	0	1	12	0	0	1	12
G. p. gambiensis	Guinea (Kifala)	30	0	0	0	30	0	0	0	30
G. p. gambiensis	Guinea (Lemonako)	20	0	0	0	20	0	0	0	20
G. p. gambiensis	Guinea (Mini)	45	0	0	1	44	0	0	1	44
G. p. gambiensis	Guinea (Tinkisso)	31	0	0	2	29	0	0	2	29
G. p. gambiensis	Mali	364	0	0	25	339	0	0	25	339
G. p. gambiensis	Senegal	547	0	0	79	469	0	0	79.1444	469.857
		2168	0	92	343	1733	14.5554	77.4446	328.445	1747.56	18.0572	2.14364e-05
Total		6860	233	638	1503	4486	220.416	650.584	1515.58	4473.42	1.10168	0.293897
Taxa with χ2 test	10
Bonferroni corrected α 0.05/10 = 0.005

## Sheet: CMH test
Supplementary table 6b: Cochran–Mantel–Haenszel test for repeated tests of independence with continuity correction on the coinfection of Sodalis and Trypanosome in wild tsetse species
Glossina taxon	No. of Locations (Samples)	Total N	S+/T+	S+/T-	S-/T+	S-/T-		Proportion S+	Proportion T+
G. austeni	9	346	0	5	58	283		0.0144509	0.16763		-0.83815	0.689562
G. brevipalpis	5	350	0	14	34	302		0.04	0.0971429		-1.36	1.18215
G. f. fuscipes	3	183	5	19	26	133		0.131148	0.169399		0.934426	2.95012
G. medicorum	2	154	0	8	61	85		0.0519481	0.396104		-3.16883	1.82609
G. m. submorsitans	3	343	0	1	62	280		0.00291545	0.180758		-0.180758	0.148085
G. p. palpalis	1	35	0	4	1	30		0.114286	0.0285714		-0.114286	0.101224
G. tachinoides	13	1068	0	0	283	785		0	0.264981		0	0
G. m. morsitans	9	369	58	98	94	119		0.422764	0.411924		-6.26016	21.8729
G. pallidipes	23	1844	170	397	541	736		0.307484	0.385575		-48.6209	93.0736
G. p. gambiensis	34	2168	0	92	343	1733		0.0424354	0.15821		-14.5554	11.738
Σ	102	6860	233	638	1503	4486		0.126968	0.253061		-74.164	133.582
											5574.72
										χ2MH	41.7326
										df	1
										P	1.04647e-10	***
