# Supplementary material for: Prevalence of Trypanosoma and Sodalis in Wild Populations of Tsetse Flies: Impact on Sit Programmes for Tsetse Eradication
Source: Research Square preprint supplement (doi:10.21203/rs.3.rs-1136039/v1), 2021-12-14
Supplement: Supplementary file 6 [file ca481ded2fca80a87b9c018f.docx]

Prevalence of trypanosomes and *Sodalis* in wild populations of tsetse flies: Impact on SIT programmes for tsetse eradication

Mouhamadou M. Dieng, Mikhailou K. Dera, Percy Moyab, Gisele M. S. Ouedraogo, Guler Demirbas-Uzel, Fabian Gstöttenmayer, Fernando C. Mulandane, Luis Neves, Sihle Mdluli, Jean-Baptiste Rayaisse, Soumaïla Pagabeleguem, Chantel J. de Beer, Andrew G. Parker, Jan Van Den Abbeele, Robert L. Mach, Marc J. B. Vreysen, and Adly M. M. Abd-Alla

03/06/2021

library(ggplot2)

## Warning: package 'ggplot2' was built under R version 4.0.5

library(lattice)
library(gcookbook)
library(ggfortify)
library(datasets)
library(MASS)
library(survival)
library(rmarkdown)
library(knitr)
library(coxme)

## Loading required package: bdsmatrix

##
## Attaching package: 'bdsmatrix'

## The following object is masked from 'package:base':
##
## backsolve

library(lme4)

## Loading required package: Matrix

library(nlme)

##
## Attaching package: 'nlme'

## The following object is masked from 'package:lme4':
##
## lmList

library(tidyverse)

## Warning: package 'tidyverse' was built under R version 4.0.5

## -- Attaching packages --------------------------------------- tidyverse 1.3.1 --

## v tibble 3.1.1 v dplyr 1.0.5
## v tidyr 1.1.3 v stringr 1.4.0
## v readr 1.4.0 v forcats 0.5.1
## v purrr 0.3.4

## Warning: package 'tibble' was built under R version 4.0.5

## Warning: package 'dplyr' was built under R version 4.0.5

## -- Conflicts ------------------------------------------ tidyverse_conflicts() --
## x dplyr::collapse() masks nlme::collapse()
## x tidyr::expand() masks Matrix::expand()
## x dplyr::filter() masks stats::filter()
## x dplyr::lag() masks stats::lag()
## x tidyr::pack() masks Matrix::pack()
## x dplyr::select() masks MASS::select()
## x tidyr::unpack() masks Matrix::unpack()

library(gapminder)
library(rcompanion)
library(FSA)

## ## FSA v0.8.32. See citation('FSA') if used in publication.
## ## Run fishR() for related website and fishR('IFAR') for related book.

library(stats)
library(RCA)

## Loading required package: igraph

##
## Attaching package: 'igraph'

## The following objects are masked from 'package:dplyr':
##
## as_data_frame, groups, union

## The following objects are masked from 'package:purrr':
##
## compose, simplify

## The following object is masked from 'package:tidyr':
##
## crossing

## The following object is masked from 'package:tibble':
##
## as_data_frame

## The following objects are masked from 'package:stats':
##
## decompose, spectrum

## The following object is masked from 'package:base':
##
## union

## Loading required package: gplots

## Registered S3 method overwritten by 'gplots':
## method from
## reorder.factor DescTools

##
## Attaching package: 'gplots'

## The following object is masked from 'package:stats':
##
## lowess

library(broom)

## Warning: package 'broom' was built under R version 4.0.5

library(sp)
library(MuMIn)

## Registered S3 methods overwritten by 'MuMIn':
## method from
## formula.coxme coxme
## logLik.coxme coxme
## logLik.lmekin coxme

library(ggpubr)

## Registered S3 methods overwritten by 'car':
## method from
## influence.merMod lme4
## cooks.distance.influence.merMod lme4
## dfbeta.influence.merMod lme4
## dfbetas.influence.merMod lme4

library(AICcmodavg)

##
## Attaching package: 'AICcmodavg'

## The following objects are masked from 'package:MuMIn':
##
## AICc, DIC, importance

## The following object is masked from 'package:lme4':
##
## checkConv

library(car)

## Warning: package 'car' was built under R version 4.0.5

## Loading required package: carData

##
## Attaching package: 'car'

## The following object is masked from 'package:FSA':
##
## bootCase

## The following object is masked from 'package:dplyr':
##
## recode

## The following object is masked from 'package:purrr':
##
## some

library(ggthemes)

## Warning: package 'ggthemes' was built under R version 4.0.5

## prepare the data

data=read.csv("rawdata_statistic_sod_tryp_bio2.csv")
str(data)

## 'data.frame': 157 obs. of 18 variables:
## $ Country : chr "ETH" "BKF" "BKF" "SEN" ...
## $ Localisation: chr "Arba minch, nech SAFr" "Comoe" "Comoe" "Pout" ...
## $ Species : chr "Gp" "Gt" "Gt" "Gpg" ...
## $ Sex : chr "NI" "F" "M" "NI" ...
## $ Sample : int 1 2 3 4 5 6 7 8 9 10 ...
## $ Prev_Sod : num 20.5 0 0 0 42.6 ...
## $ Prev_Tspp : num 20.04 16.54 15 7.04 88.72 ...
## $ Prev_Tc : num 6.1 1.1 3.64 1.51 21.54 ...
## $ Prev_Tv : num 0.65 13.24 11.36 2.01 15.38 ...
## $ Prev_Tz : num 1.09 0.37 0 0.5 0.51 1.03 0 0.68 0.68 0 ...
## $ Prev_Tsg : num 10.46 0 0 3.02 26.15 ...
## $ Prev_TcTv : num 0 0.74 0 0 6.67 1.03 0 0 0 0 ...
## $ Prev_TcTz : num 0 1.1 0 0 1.54 0.51 0 0 0 0.76 ...
## $ Prev_TcTsg : num 0.65 0 0 0 15.9 0.51 0 7.53 0.68 0 ...
## $ Prev_TvTz : num 0 0 0 0 1.03 0 0 0 0 0 ...
## $ Prev_TvTsg : num 0.44 0 0 0 0 0 0 0 0.68 0 ...
## $ Prev_TzTsg : num 0.65 0 0 0 0 1.03 0 0 0.68 0 ...
## $ Prev_TcTvTz : num 0 0 0 0 0 0 0 0 0 0 ...

attach(data)
head(data)

## Country Localisation Species Sex Sample Prev_Sod Prev_Tspp Prev_Tc
## 1 ETH Arba minch, nech SAFr Gp NI 1 20.48 20.04 6.10
## 2 BKF Comoe Gt F 2 0.00 16.54 1.10
## 3 BKF Comoe Gt M 3 0.00 15.00 3.64
## 4 SEN Pout Gpg NI 4 0.00 7.04 1.51
## 5 KEN Katotoi Gp NI 5 42.56 88.72 21.54
## 6 KEN Mwea Gp NI 6 3.08 19.49 7.18
## Prev_Tv Prev_Tz Prev_Tsg Prev_TcTv Prev_TcTz Prev_TcTsg Prev_TvTz Prev_TvTsg
## 1 0.65 1.09 10.46 0.00 0.00 0.65 0.00 0.44
## 2 13.24 0.37 0.00 0.74 1.10 0.00 0.00 0.00
## 3 11.36 0.00 0.00 0.00 0.00 0.00 0.00 0.00
## 4 2.01 0.50 3.02 0.00 0.00 0.00 0.00 0.00
## 5 15.38 0.51 26.15 6.67 1.54 15.90 1.03 0.00
## 6 0.51 1.03 7.69 1.03 0.51 0.51 0.00 0.00
## Prev_TzTsg Prev_TcTvTz
## 1 0.65 0
## 2 0.00 0
## 3 0.00 0
## 4 0.00 0
## 5 0.00 0
## 6 1.03 0

data=na.omit(data)
data

## Country Localisation Species Sex Sample Prev_Sod Prev_Tspp
## 1 ETH Arba minch, nech SAFr Gp NI 1 20.48 20.04
## 2 BKF Comoe Gt F 2 0.00 16.54
## 3 BKF Comoe Gt M 3 0.00 15.00
## 4 SEN Pout Gpg NI 4 0.00 7.04
## 5 KEN Katotoi Gp NI 5 42.56 88.72
## 6 KEN Mwea Gp NI 6 3.08 19.49
## 7 SAF Phinda Gb NI 7 4.12 0.00
## 8 ZAM Mfuwe Gp NI 8 2.05 45.21
## 9 URT URTzania Gp NI 9 78.77 19.86
## 10 BKF Comoe Gmsm F 10 0.00 9.16
## 11 BKF Folonzo Gt F 11 0.00 18.87
## 12 BKF Folonzo Gpg F 12 0.00 7.55
## 13 BKF Folonzo Gpg M 13 1.89 16.04
## 14 BKF Folonzo Gt M 14 0.00 32.63
## 15 GUI Kangoliya Gpg F 15 95.74 0.00
## 16 UGA Buvuma island Gff NI 16 4.26 10.64
## 17 KEN Kari Gp NI 17 89.36 2.13
## 18 SEN Kayar Gpg NI 18 0.00 1.14
## 19 KEN Koibos Gp NI 19 0.00 71.59
## 20 KEN Meru nat. parc Gp NI 20 22.99 70.11
## 21 KEN Kari Gmm NI 21 63.53 2.35
## 22 URT MaSAFng-URTga Gmm NI 22 76.54 53.09
## 23 KEN Ruma nat. parc Gp NI 23 26.25 17.50
## 24 GHA Walewale Gt M 24 0.00 53.85
## 25 BKF Moussodougou Gpg F 25 0.00 44.87
## 26 ZIM Makuti Gmm NI 26 26.92 91.03
## 27 SAF False Bay Park Ga NI 27 0.00 2.60
## 28 BKF Comoe Gmsm M 28 0.00 10.67
## 29 BKF Folonzo Gmsm M 29 0.00 40.00
## 30 BKF Comoe Gpg F 30 0.00 2.82
## 31 URT MaSAFng-URTga Gp NI 31 66.20 73.24
## 32 BKF Kartasso Gpg F 32 0.00 0.00
## 33 BKF Kartasso Gpg M 33 0.00 0.00
## 34 SEN DiackSAFo Peulh Gpg NI 34 0.00 7.69
## 35 BKF Moussodougou Gpg M 35 0.00 21.88
## 37 BKF Comoe Gmed M 37 6.56 24.59
## 38 KEN Emsos Gp NI 38 0.00 93.33
## 39 BKF Folonzo Gmsm F 39 1.69 20.34
## 40 MLI Bani Gpg F 40 0.00 1.72
## 41 SAF SAFint Lucia Ga NI 41 0.00 38.60
## 42 UGA Budaka Gp NI 42 94.55 7.27
## 43 GHA Walewale Gt F 43 0.00 66.04
## 44 BKF Arly Gt F 44 0.00 1.89
## 45 BKF Kampty Gpg F 45 0.00 90.57
## 46 SAF Lower Mkhuze Ga NI 46 0.00 43.40
## 47 BKF Comoe Gpg M 47 0.00 1.92
## 48 MLI SEN Gpg M 48 0.00 7.69
## 49 KEN Ikapolok Gff NI 49 39.22 37.25
## 50 SAF Hluhluwe Gb NI 50 0.00 32.00
## 51 SAF North eastern KwaZulu-Natal Gb NI 51 0.00 4.00
## 52 MOZ Reserva Especial de Maputo Gb NI 52 14.00 6.00
## 53 MOZ Reserva Especial de Maputo Ga NI 53 0.00 10.00
## 54 BKF Bama Gpg F 54 0.00 0.00
## 55 BKF Arly Gt M 55 0.00 0.00
## 56 SEN Tambacounda Gpg F 56 0.00 41.46
## 57 SEN Tambacounda Gpg M 57 0.00 71.79
## 58 SEN SebikoURTe Gpg NI 58 0.00 5.13
## 59 SAF North eastern KwaZulu-Natal Ga NI 59 5.13 5.13
## 60 ZIM Makuti Gp NI 60 15.79 86.84
## 61 KEN Obekai Gff NI 61 0.00 5.26
## 62 MLI SEN Gpg F 62 0.00 0.00
## 63 ZAI ZAI Gpp NI 63 11.43 2.86
## 64 BKF Bama Gpg M 64 0.00 0.00
## 65 MLI Banco Gpg F 65 0.00 20.59
## 66 BKF Dedougou Gpg F 66 0.00 52.94
## 67 MLI Sikasso Gpg F 67 0.00 6.06
## 68 BKF Comoe Gmed F 68 12.12 51.52
## 69 GHA MorURTi Gt M 69 0.00 50.00
## 70 BKF Sissili Gt M 70 0.00 25.00
## 71 GUI Kangoliya Gpg M 71 0.00 0.00
## 72 BKF Folonzo Gmed F 72 0.00 50.00
## 73 BKF Folonzo Gmed M 73 0.00 46.67
## 74 SAF SAFint Lucia Gb NI 74 0.00 43.33
## 75 SWA Mlawula Nature Reserve Ga NI 75 0.00 0.00
## 76 URT Uguja island Ga NI 76 6.67 10.00
## 77 GUI Mini Gpg F 77 0.00 3.45
## 78 SEN Hann Gpg NI 78 0.00 0.00
## 79 UGA Omugo Gp NI 79 100.00 0.00
## 80 BKF Kampty Gpg M 80 0.00 80.77
## 81 ZIM Mushumb Gp NI 81 3.85 19.23
## 82 GUI Kifala Gpg M 82 0.00 0.00
## 83 MLI Sikasso Gpg M 83 0.00 0.00
## 84 MLI SS Gpg F 84 0.00 4.00
## 85 UGA Lira Gp NI 85 0.00 16.00
## 86 BKF Kenedougou Gpg F 86 0.00 0.00
## 87 MLI SS Gpg M 87 0.00 0.00
## 88 BKF Dedougou Gpg M 88 0.00 69.57
## 89 GUI Bafing Gpg F 89 0.00 5.00
## 90 KEN Kiria Gp NI 90 0.00 80.00
## 91 BKF Kampty Gpg NI 91 0.00 84.21
## 92 GUI Tinkisso Gpg M 92 0.00 5.56
## 93 ZIM Kemukura Gmm NI 93 22.22 5.56
## 94 BKF Kenedougou Gpg M 94 0.00 0.00
## 95 GHA Bougouhiya Gt F 95 0.00 18.75
## 96 GUI Dekonkore Gpg F 96 0.00 6.25
## 97 GUI Mini Gpg M 97 0.00 0.00
## 98 SEN Fleuve Gambie Gpg M 98 0.00 43.75
## 99 BKF Sissili Gt F 99 0.00 13.33
## 100 ZIM Rukomeshi Gmm NI 100 20.00 0.00
## 101 KEN Mwea nat. parc Gp NI 101 0.00 13.33
## 102 GUI Bafing Gpg M 102 0.00 0.00
## 103 GUI Tinkisso Gpg F 103 0.00 7.69
## 104 BKF Bouroum bouroum Gpg F 104 0.00 92.31
## 105 ZIM Mukondore Gmm NI 105 23.08 7.69
## 106 GUI Karifale Gpg M 106 0.00 8.33
## 107 GUI Lemonako Gpg F 107 0.00 0.00
## 108 BKF KouriGUIon Gpg F 108 0.00 50.00
## 109 MLI Bani Gpg M 109 0.00 0.00
## 110 MLI Sybi Gpg F 110 0.00 0.00
## 111 MLI Sybi Gpg M 111 0.00 0.00
## 112 GHA MorURTi Gt F 112 0.00 66.67
## 113 SEN Fleueve G Gpg F 113 0.00 11.11
## 114 BKF KouriGUIon Gpg NI 114 0.00 22.22
## 115 ZIM M. chiuyi Gmm NI 115 11.11 0.00
## 116 GHA Fumbissi Gt F 116 0.00 100.00
## 117 GUI Lemonako Gpg M 117 0.00 0.00
## 118 UGA Moyo Gp NI 118 87.50 12.50
## 119 SEN Diaguiri Gpg F 119 0.00 0.00
## 120 MLI Banco Gpg M 120 0.00 28.57
## 121 MLI Baoule Gpg F 121 0.00 42.86
## 122 MLI Baoule Gpg M 122 0.00 42.86
## 123 MLI Bougouni Gpg M 123 0.00 0.00
## 124 BKF Lorepeni Gpg F 124 0.00 71.43
## 125 GHA Fumbissi Gt M 125 0.00 100.00
## 126 GHA Grogro Gt M 126 0.00 100.00
## 127 SEN MousSAFlla Gpg M 127 0.00 0.00
## 128 MLI Baguineda Gpg F 128 0.00 16.67
## 129 MLI Bougouni Gpg F 129 0.00 0.00
## 130 MLI Kita Gpg M 130 0.00 16.67
## 131 ZIM Mushumb Gmm NI 131 0.00 33.33
## 132 URT Zanzibar Ga NI 132 16.67 0.00
## 133 GHA Grogro Gt F 133 0.00 100.00
## 134 GHA Kumpole Gt F 134 0.00 100.00
## 135 GHA Sissili Bidge Gt F 135 0.00 100.00
## 136 GUI Kifala Gpg F 136 0.00 0.00
## 137 BKF Bouroum bouroum Gpg M 137 0.00 80.00
## 138 SEN Fleuve Gambie Gpg F 138 0.00 25.00
## 139 ZIM Rukomeshi Gp NI 139 0.00 0.00
## 140 ZIM Gokwe Gp NI 140 0.00 0.00
## 141 URT Jozani Ga NI 141 0.00 25.00
## 142 GHA Bougouhiya Gt M 142 0.00 0.00
## 143 SEN Niokolo Gpg M 143 0.00 0.00
## 144 BKF Sissili Gmsm M 144 0.00 0.00
## 145 BKF Lorepeni Gpg M 145 0.00 100.00
## 146 BKF KouriGUIon Gpg M 146 0.00 66.67
## 147 BKF Ouarkoye Gpg M 147 0.00 100.00
## 148 GHA Kumpole Gt M 148 0.00 100.00
## 149 GHA Psikp_ Gt M 149 0.00 100.00
## 150 SEN Diaguiri Gpg M 150 0.00 50.00
## 151 BKF Ouarkoye Gpg F 151 0.00 100.00
## 152 GHA Kandiaga Gt M 152 0.00 100.00
## 153 GHA Sissili Bidge Gt M 153 0.00 100.00
## 154 GHA Nabogo Gt F 154 0.00 0.00
## 155 GHA Volta Blanche Gt F 155 0.00 0.00
## 156 GUI Karifale Gpg F 156 0.00 0.00
## 157 SEN Mako Gpg M 157 0.00 100.00
## Prev_Tc Prev_Tv Prev_Tz Prev_Tsg Prev_TcTv Prev_TcTz Prev_TcTsg Prev_TvTz
## 1 6.10 0.65 1.09 10.46 0.00 0.00 0.65 0.00
## 2 1.10 13.24 0.37 0.00 0.74 1.10 0.00 0.00
## 3 3.64 11.36 0.00 0.00 0.00 0.00 0.00 0.00
## 4 1.51 2.01 0.50 3.02 0.00 0.00 0.00 0.00
## 5 21.54 15.38 0.51 26.15 6.67 1.54 15.90 1.03
## 6 7.18 0.51 1.03 7.69 1.03 0.51 0.51 0.00
## 7 0.00 0.00 0.00 0.00 0.00 0.00 0.00 0.00
## 8 1.37 0.68 0.68 34.93 0.00 0.00 7.53 0.00
## 9 6.16 2.74 0.68 8.22 0.00 0.00 0.68 0.00
## 10 5.34 3.05 0.00 0.00 0.00 0.76 0.00 0.00
## 11 1.89 12.26 1.89 0.00 1.89 0.94 0.00 0.00
## 12 0.94 2.83 1.89 0.00 0.00 0.00 0.00 1.89
## 13 0.00 5.66 5.66 0.00 0.00 1.89 0.00 2.83
## 14 2.11 27.37 1.05 0.00 0.00 1.05 0.00 1.05
## 15 0.00 0.00 0.00 0.00 0.00 0.00 0.00 0.00
## 16 3.19 2.13 1.06 3.19 0.00 0.00 1.06 0.00
## 17 1.06 0.00 1.06 0.00 0.00 0.00 0.00 0.00
## 18 0.00 0.00 0.00 1.14 0.00 0.00 0.00 0.00
## 19 15.91 9.09 0.00 28.41 0.00 0.00 15.91 0.00
## 20 29.89 4.60 0.00 25.29 0.00 0.00 10.34 0.00
## 21 2.35 0.00 0.00 0.00 0.00 0.00 0.00 0.00
## 22 18.52 1.23 1.23 18.52 0.00 0.00 6.17 0.00
## 23 10.00 2.50 2.50 0.00 1.25 0.00 0.00 0.00
## 24 3.85 12.82 8.97 0.00 0.00 10.26 0.00 14.10
## 25 0.00 20.51 12.82 0.00 0.00 0.00 0.00 11.54
## 26 11.54 0.00 2.56 69.23 0.00 0.00 7.69 0.00
## 27 2.60 0.00 0.00 0.00 0.00 0.00 0.00 0.00
## 28 5.33 2.67 1.33 0.00 0.00 1.33 0.00 0.00
## 29 5.33 34.67 0.00 0.00 0.00 0.00 0.00 0.00
## 30 1.41 1.41 0.00 0.00 0.00 0.00 0.00 0.00
## 31 33.80 0.00 0.00 14.08 0.00 1.41 21.13 1.41
## 32 0.00 0.00 0.00 0.00 0.00 0.00 0.00 0.00
## 33 0.00 0.00 0.00 0.00 0.00 0.00 0.00 0.00
## 34 0.00 1.54 1.54 4.62 0.00 0.00 0.00 0.00
## 35 0.00 6.25 15.63 0.00 0.00 0.00 0.00 0.00
## 37 6.56 13.11 4.92 0.00 0.00 0.00 0.00 0.00
## 38 15.00 8.33 0.00 58.33 1.67 0.00 10.00 0.00
## 39 5.08 11.86 1.69 0.00 0.00 1.69 0.00 0.00
## 40 0.00 1.72 0.00 0.00 0.00 0.00 0.00 0.00
## 41 10.53 0.00 10.53 15.79 0.00 0.00 1.75 0.00
## 42 1.82 0.00 0.00 5.45 0.00 0.00 0.00 0.00
## 43 1.89 9.43 24.53 0.00 0.00 16.98 0.00 7.55
## 44 0.00 0.00 1.89 0.00 0.00 0.00 0.00 0.00
## 45 1.89 62.26 1.89 11.32 0.00 0.00 0.00 0.00
## 46 9.43 1.89 3.77 24.53 1.89 0.00 1.89 0.00
## 47 1.92 0.00 0.00 0.00 0.00 0.00 0.00 0.00
## 48 1.92 1.92 3.85 0.00 0.00 0.00 0.00 0.00
## 49 1.96 9.80 0.00 19.61 3.92 1.96 0.00 0.00
## 50 12.00 2.00 14.00 4.00 0.00 0.00 0.00 0.00
## 51 2.00 0.00 0.00 2.00 0.00 0.00 0.00 0.00
## 52 0.00 2.00 0.00 2.00 0.00 0.00 0.00 0.00
## 53 6.00 0.00 0.00 4.00 0.00 0.00 0.00 0.00
## 54 0.00 0.00 0.00 0.00 0.00 0.00 0.00 0.00
## 55 0.00 0.00 0.00 0.00 0.00 0.00 0.00 0.00
## 56 0.00 26.83 7.32 0.00 0.00 0.00 0.00 7.32
## 57 0.00 53.85 2.56 0.00 0.00 0.00 0.00 15.38
## 58 0.00 5.13 0.00 0.00 0.00 0.00 0.00 0.00
## 59 2.56 0.00 0.00 2.56 0.00 0.00 0.00 0.00
## 60 7.89 0.00 0.00 73.68 0.00 0.00 5.26 0.00
## 61 2.63 2.63 0.00 0.00 0.00 0.00 0.00 0.00
## 62 0.00 0.00 0.00 0.00 0.00 0.00 0.00 0.00
## 63 0.00 2.86 0.00 0.00 0.00 0.00 0.00 0.00
## 64 0.00 0.00 0.00 0.00 0.00 0.00 0.00 0.00
## 65 0.00 20.59 0.00 0.00 0.00 0.00 0.00 0.00
## 66 0.00 26.47 0.00 23.53 0.00 0.00 0.00 0.00
## 67 0.00 0.00 6.06 0.00 0.00 0.00 0.00 0.00
## 68 30.30 18.18 0.00 0.00 0.00 0.00 0.00 0.00
## 69 0.00 15.63 15.63 0.00 0.00 18.75 0.00 0.00
## 70 12.50 12.50 0.00 0.00 0.00 0.00 0.00 0.00
## 71 0.00 0.00 0.00 0.00 0.00 0.00 0.00 0.00
## 72 0.00 13.33 26.67 0.00 0.00 3.33 0.00 3.33
## 73 0.00 0.00 33.33 0.00 6.67 3.33 0.00 0.00
## 74 0.00 3.33 3.33 36.67 0.00 0.00 0.00 0.00
## 75 0.00 0.00 0.00 0.00 0.00 0.00 0.00 0.00
## 76 0.00 6.67 3.33 0.00 0.00 0.00 0.00 0.00
## 77 0.00 3.45 0.00 0.00 0.00 0.00 0.00 0.00
## 78 0.00 0.00 0.00 0.00 0.00 0.00 0.00 0.00
## 79 0.00 0.00 0.00 0.00 0.00 0.00 0.00 0.00
## 80 0.00 65.38 0.00 7.69 0.00 0.00 0.00 0.00
## 81 3.85 0.00 7.69 3.85 0.00 0.00 3.85 0.00
## 82 0.00 0.00 0.00 0.00 0.00 0.00 0.00 0.00
## 83 0.00 0.00 0.00 0.00 0.00 0.00 0.00 0.00
## 84 0.00 4.00 0.00 0.00 0.00 0.00 0.00 0.00
## 85 8.00 0.00 4.00 4.00 0.00 0.00 0.00 0.00
## 86 0.00 0.00 0.00 0.00 0.00 0.00 0.00 0.00
## 87 0.00 0.00 0.00 0.00 0.00 0.00 0.00 0.00
## 88 4.35 30.43 13.04 4.35 0.00 0.00 4.35 0.00
## 89 0.00 5.00 0.00 0.00 0.00 0.00 0.00 0.00
## 90 55.00 5.00 0.00 10.00 10.00 0.00 0.00 0.00
## 91 0.00 26.32 5.26 21.05 0.00 0.00 0.00 0.00
## 92 0.00 5.56 0.00 0.00 0.00 0.00 0.00 0.00
## 93 0.00 5.56 0.00 0.00 0.00 0.00 0.00 0.00
## 94 0.00 0.00 0.00 0.00 0.00 0.00 0.00 0.00
## 95 0.00 6.25 0.00 0.00 0.00 0.00 0.00 12.50
## 96 0.00 6.25 0.00 0.00 0.00 0.00 0.00 0.00
## 97 0.00 0.00 0.00 0.00 0.00 0.00 0.00 0.00
## 98 0.00 43.75 0.00 0.00 0.00 0.00 0.00 0.00
## 99 6.67 6.67 0.00 0.00 0.00 0.00 0.00 0.00
## 100 0.00 0.00 0.00 0.00 0.00 0.00 0.00 0.00
## 101 13.33 0.00 0.00 0.00 0.00 0.00 0.00 0.00
## 102 0.00 0.00 0.00 0.00 0.00 0.00 0.00 0.00
## 103 0.00 7.69 0.00 0.00 0.00 0.00 0.00 0.00
## 104 0.00 53.85 0.00 23.08 0.00 0.00 0.00 0.00
## 105 7.69 0.00 0.00 0.00 0.00 0.00 0.00 0.00
## 106 0.00 8.33 0.00 0.00 0.00 0.00 0.00 0.00
## 107 0.00 8.33 0.00 0.00 0.00 0.00 0.00 0.00
## 108 0.00 0.00 0.00 33.33 0.00 0.00 0.00 0.00
## 109 0.00 0.00 0.00 0.00 0.00 0.00 0.00 0.00
## 110 0.00 0.00 0.00 0.00 0.00 0.00 0.00 0.00
## 111 0.00 0.00 0.00 0.00 0.00 0.00 0.00 0.00
## 112 0.00 0.00 33.33 0.00 0.00 22.22 0.00 11.11
## 113 0.00 11.11 0.00 0.00 0.00 0.00 0.00 0.00
## 114 0.00 0.00 0.00 11.11 0.00 0.00 0.00 0.00
## 115 0.00 0.00 0.00 0.00 0.00 0.00 0.00 0.00
## 116 0.00 0.00 37.50 0.00 0.00 0.00 0.00 62.50
## 117 0.00 0.00 0.00 0.00 0.00 0.00 0.00 0.00
## 118 0.00 0.00 0.00 12.50 0.00 0.00 0.00 0.00
## 119 0.00 0.00 0.00 0.00 0.00 0.00 0.00 0.00
## 120 0.00 28.57 0.00 0.00 0.00 0.00 0.00 0.00
## 121 0.00 42.86 0.00 0.00 0.00 0.00 0.00 0.00
## 122 0.00 42.86 0.00 0.00 0.00 0.00 0.00 0.00
## 123 0.00 0.00 0.00 0.00 0.00 0.00 0.00 0.00
## 124 0.00 14.29 0.00 28.57 0.00 0.00 0.00 0.00
## 125 0.00 66.67 33.33 0.00 0.00 0.00 0.00 0.00
## 126 0.00 0.00 16.67 0.00 0.00 0.00 0.00 83.33
## 127 0.00 0.00 0.00 0.00 0.00 0.00 0.00 0.00
## 128 0.00 16.67 0.00 0.00 0.00 0.00 0.00 0.00
## 129 0.00 0.00 0.00 0.00 0.00 0.00 0.00 0.00
## 130 0.00 16.67 0.00 0.00 0.00 0.00 0.00 0.00
## 131 16.67 0.00 0.00 16.67 0.00 0.00 0.00 0.00
## 132 0.00 0.00 0.00 0.00 0.00 0.00 0.00 0.00
## 133 0.00 80.00 20.00 0.00 0.00 0.00 0.00 0.00
## 134 0.00 40.00 60.00 0.00 0.00 0.00 0.00 0.00
## 135 0.00 20.00 80.00 0.00 0.00 0.00 0.00 0.00
## 136 0.00 0.00 0.00 0.00 0.00 0.00 0.00 0.00
## 137 0.00 40.00 0.00 20.00 0.00 0.00 0.00 0.00
## 138 0.00 25.00 0.00 0.00 0.00 0.00 0.00 0.00
## 139 0.00 0.00 0.00 0.00 0.00 0.00 0.00 0.00
## 140 0.00 0.00 0.00 0.00 0.00 0.00 0.00 0.00
## 141 0.00 0.00 25.00 0.00 0.00 0.00 0.00 0.00
## 142 0.00 0.00 0.00 0.00 0.00 0.00 0.00 0.00
## 143 0.00 66.67 0.00 0.00 0.00 0.00 0.00 0.00
## 144 0.00 0.00 0.00 0.00 0.00 0.00 0.00 0.00
## 145 0.00 0.00 0.00 0.00 0.00 0.00 0.00 0.00
## 146 0.00 33.33 0.00 0.00 0.00 0.00 0.00 0.00
## 147 0.00 33.33 0.00 0.00 0.00 0.00 0.00 0.00
## 148 0.00 50.00 50.00 0.00 0.00 0.00 0.00 0.00
## 149 0.00 0.00 50.00 0.00 0.00 0.00 0.00 50.00
## 150 0.00 0.00 50.00 0.00 0.00 0.00 0.00 0.00
## 151 50.00 50.00 0.00 0.00 0.00 0.00 0.00 0.00
## 152 0.00 0.00 100.00 0.00 0.00 0.00 0.00 0.00
## 153 0.00 0.00 100.00 0.00 0.00 0.00 0.00 0.00
## 154 0.00 0.00 0.00 0.00 0.00 0.00 0.00 0.00
## 155 0.00 0.00 0.00 0.00 0.00 0.00 0.00 0.00
## 156 0.00 0.00 0.00 0.00 0.00 0.00 0.00 0.00
## 157 0.00 100.00 0.00 0.00 0.00 0.00 0.00 0.00
## Prev_TvTsg Prev_TzTsg Prev_TcTvTz
## 1 0.44 0.65 0.00
## 2 0.00 0.00 0.00
## 3 0.00 0.00 0.00
## 4 0.00 0.00 0.00
## 5 0.00 0.00 0.00
## 6 0.00 1.03 0.00
## 7 0.00 0.00 0.00
## 8 0.00 0.00 0.00
## 9 0.68 0.68 0.00
## 10 0.00 0.00 0.00
## 11 0.00 0.00 0.00
## 12 0.00 0.00 0.00
## 13 0.00 0.00 0.00
## 14 0.00 0.00 0.00
## 15 0.00 0.00 0.00
## 16 0.00 0.00 0.00
## 17 0.00 0.00 0.00
## 18 0.00 0.00 0.00
## 19 0.00 2.27 0.00
## 20 0.00 0.00 0.00
## 21 0.00 0.00 0.00
## 22 6.17 1.23 0.00
## 23 1.25 0.00 0.00
## 24 0.00 0.00 1.28
## 25 0.00 0.00 0.00
## 26 0.00 0.00 0.00
## 27 0.00 0.00 0.00
## 28 0.00 0.00 0.00
## 29 0.00 0.00 0.00
## 30 0.00 0.00 0.00
## 31 0.00 1.41 0.00
## 32 0.00 0.00 0.00
## 33 0.00 0.00 0.00
## 34 0.00 0.00 0.00
## 35 0.00 0.00 0.00
## 37 0.00 0.00 0.00
## 38 0.00 0.00 0.00
## 39 0.00 0.00 0.00
## 40 0.00 0.00 0.00
## 41 0.00 0.00 0.00
## 42 0.00 0.00 0.00
## 43 0.00 0.00 5.66
## 44 0.00 0.00 0.00
## 45 9.43 3.77 0.00
## 46 0.00 0.00 0.00
## 47 0.00 0.00 0.00
## 48 0.00 0.00 0.00
## 49 0.00 0.00 0.00
## 50 0.00 0.00 0.00
## 51 0.00 0.00 0.00
## 52 2.00 0.00 0.00
## 53 0.00 0.00 0.00
## 54 0.00 0.00 0.00
## 55 0.00 0.00 0.00
## 56 0.00 0.00 0.00
## 57 0.00 0.00 0.00
## 58 0.00 0.00 0.00
## 59 0.00 0.00 0.00
## 60 0.00 0.00 0.00
## 61 0.00 0.00 0.00
## 62 0.00 0.00 0.00
## 63 0.00 0.00 0.00
## 64 0.00 0.00 0.00
## 65 0.00 0.00 0.00
## 66 2.94 0.00 0.00
## 67 0.00 0.00 0.00
## 68 0.00 0.00 0.00
## 69 0.00 0.00 0.00
## 70 0.00 0.00 0.00
## 71 0.00 0.00 0.00
## 72 0.00 0.00 3.33
## 73 0.00 0.00 3.33
## 74 0.00 0.00 0.00
## 75 0.00 0.00 0.00
## 76 0.00 0.00 0.00
## 77 0.00 0.00 0.00
## 78 0.00 0.00 0.00
## 79 0.00 0.00 0.00
## 80 7.69 0.00 0.00
## 81 0.00 0.00 0.00
## 82 0.00 0.00 0.00
## 83 0.00 0.00 0.00
## 84 0.00 0.00 0.00
## 85 0.00 0.00 0.00
## 86 0.00 0.00 0.00
## 87 0.00 0.00 0.00
## 88 4.35 8.70 0.00
## 89 0.00 0.00 0.00
## 90 0.00 0.00 0.00
## 91 31.58 0.00 0.00
## 92 0.00 0.00 0.00
## 93 0.00 0.00 0.00
## 94 0.00 0.00 0.00
## 95 0.00 0.00 0.00
## 96 0.00 0.00 0.00
## 97 0.00 0.00 0.00
## 98 0.00 0.00 0.00
## 99 0.00 0.00 0.00
## 100 0.00 0.00 0.00
## 101 0.00 0.00 0.00
## 102 0.00 0.00 0.00
## 103 0.00 0.00 0.00
## 104 15.38 0.00 0.00
## 105 0.00 0.00 0.00
## 106 0.00 0.00 0.00
## 107 0.00 0.00 0.00
## 108 16.67 0.00 0.00
## 109 0.00 0.00 0.00
## 110 0.00 0.00 0.00
## 111 0.00 0.00 0.00
## 112 0.00 0.00 0.00
## 113 0.00 0.00 0.00
## 114 11.11 0.00 0.00
## 115 0.00 0.00 0.00
## 116 0.00 0.00 0.00
## 117 0.00 0.00 0.00
## 118 0.00 0.00 0.00
## 119 0.00 0.00 0.00
## 120 0.00 0.00 0.00
## 121 0.00 0.00 0.00
## 122 0.00 0.00 0.00
## 123 0.00 0.00 0.00
## 124 28.57 0.00 0.00
## 125 0.00 0.00 0.00
## 126 0.00 0.00 0.00
## 127 0.00 0.00 0.00
## 128 0.00 0.00 0.00
## 129 0.00 0.00 0.00
## 130 0.00 0.00 0.00
## 131 0.00 0.00 0.00
## 132 0.00 0.00 0.00
## 133 0.00 0.00 0.00
## 134 0.00 0.00 0.00
## 135 0.00 0.00 0.00
## 136 0.00 0.00 0.00
## 137 20.00 0.00 0.00
## 138 0.00 0.00 0.00
## 139 0.00 0.00 0.00
## 140 0.00 0.00 0.00
## 141 0.00 0.00 0.00
## 142 0.00 0.00 0.00
## 143 0.00 0.00 0.00
## 144 0.00 0.00 0.00
## 145 66.67 33.33 0.00
## 146 33.33 0.00 0.00
## 147 33.33 33.33 0.00
## 148 0.00 0.00 0.00
## 149 0.00 0.00 0.00
## 150 0.00 0.00 0.00
## 151 0.00 0.00 0.00
## 152 0.00 0.00 0.00
## 153 0.00 0.00 0.00
## 154 0.00 0.00 0.00
## 155 0.00 0.00 0.00
## 156 0.00 0.00 0.00
## 157 0.00 0.00 0.00

data$Country=as.factor(data$Country)
data$Localisation=as.factor(data$Localisation)
data$Species=as.factor(data$Species)
data$Sex=as.factor(data$Sex)
str(data)

## 'data.frame': 156 obs. of 18 variables:
## $ Country : Factor w/ 15 levels "BKF","ETH","GHA",..: 2 1 1 9 5 5 8 14 12 1 ...
## $ Localisation: Factor w/ 94 levels "Arba minch, nech SAFr",..: 1 14 14 74 37 65 73 56 90 14 ...
## $ Species : Factor w/ 10 levels "Ga","Gb","Gff",..: 7 10 10 8 7 7 2 7 7 6 ...
## $ Sex : Factor w/ 3 levels "F","M","NI": 3 1 2 3 3 3 3 3 3 1 ...
## $ Sample : int 1 2 3 4 5 6 7 8 9 10 ...
## $ Prev_Sod : num 20.5 0 0 0 42.6 ...
## $ Prev_Tspp : num 20.04 16.54 15 7.04 88.72 ...
## $ Prev_Tc : num 6.1 1.1 3.64 1.51 21.54 ...
## $ Prev_Tv : num 0.65 13.24 11.36 2.01 15.38 ...
## $ Prev_Tz : num 1.09 0.37 0 0.5 0.51 1.03 0 0.68 0.68 0 ...
## $ Prev_Tsg : num 10.46 0 0 3.02 26.15 ...
## $ Prev_TcTv : num 0 0.74 0 0 6.67 1.03 0 0 0 0 ...
## $ Prev_TcTz : num 0 1.1 0 0 1.54 0.51 0 0 0 0.76 ...
## $ Prev_TcTsg : num 0.65 0 0 0 15.9 0.51 0 7.53 0.68 0 ...
## $ Prev_TvTz : num 0 0 0 0 1.03 0 0 0 0 0 ...
## $ Prev_TvTsg : num 0.44 0 0 0 0 0 0 0 0.68 0 ...
## $ Prev_TzTsg : num 0.65 0 0 0 0 1.03 0 0 0.68 0 ...
## $ Prev_TcTvTz : num 0 0 0 0 0 0 0 0 0 0 ...
## - attr(*, "na.action")= 'omit' Named int 36
## ..- attr(*, "names")= chr "36"

attach(data)

## The following objects are masked from data (pos = 3):
##
## Country, Localisation, Prev_Sod, Prev_Tc, Prev_TcTsg, Prev_TcTv,
## Prev_TcTvTz, Prev_TcTz, Prev_Tsg, Prev_Tspp, Prev_Tv, Prev_TvTsg,
## Prev_TvTz, Prev_Tz, Prev_TzTsg, Sample, Sex, Species

head(data)

## Country Localisation Species Sex Sample Prev_Sod Prev_Tspp Prev_Tc
## 1 ETH Arba minch, nech SAFr Gp NI 1 20.48 20.04 6.10
## 2 BKF Comoe Gt F 2 0.00 16.54 1.10
## 3 BKF Comoe Gt M 3 0.00 15.00 3.64
## 4 SEN Pout Gpg NI 4 0.00 7.04 1.51
## 5 KEN Katotoi Gp NI 5 42.56 88.72 21.54
## 6 KEN Mwea Gp NI 6 3.08 19.49 7.18
## Prev_Tv Prev_Tz Prev_Tsg Prev_TcTv Prev_TcTz Prev_TcTsg Prev_TvTz Prev_TvTsg
## 1 0.65 1.09 10.46 0.00 0.00 0.65 0.00 0.44
## 2 13.24 0.37 0.00 0.74 1.10 0.00 0.00 0.00
## 3 11.36 0.00 0.00 0.00 0.00 0.00 0.00 0.00
## 4 2.01 0.50 3.02 0.00 0.00 0.00 0.00 0.00
## 5 15.38 0.51 26.15 6.67 1.54 15.90 1.03 0.00
## 6 0.51 1.03 7.69 1.03 0.51 0.51 0.00 0.00
## Prev_TzTsg Prev_TcTvTz
## 1 0.65 0
## 2 0.00 0
## 3 0.00 0
## 4 0.00 0
## 5 0.00 0
## 6 1.03 0

data=na.omit(data)
data

## Country Localisation Species Sex Sample Prev_Sod Prev_Tspp
## 1 ETH Arba minch, nech SAFr Gp NI 1 20.48 20.04
## 2 BKF Comoe Gt F 2 0.00 16.54
## 3 BKF Comoe Gt M 3 0.00 15.00
## 4 SEN Pout Gpg NI 4 0.00 7.04
## 5 KEN Katotoi Gp NI 5 42.56 88.72
## 6 KEN Mwea Gp NI 6 3.08 19.49
## 7 SAF Phinda Gb NI 7 4.12 0.00
## 8 ZAM Mfuwe Gp NI 8 2.05 45.21
## 9 URT URTzania Gp NI 9 78.77 19.86
## 10 BKF Comoe Gmsm F 10 0.00 9.16
## 11 BKF Folonzo Gt F 11 0.00 18.87
## 12 BKF Folonzo Gpg F 12 0.00 7.55
## 13 BKF Folonzo Gpg M 13 1.89 16.04
## 14 BKF Folonzo Gt M 14 0.00 32.63
## 15 GUI Kangoliya Gpg F 15 95.74 0.00
## 16 UGA Buvuma island Gff NI 16 4.26 10.64
## 17 KEN Kari Gp NI 17 89.36 2.13
## 18 SEN Kayar Gpg NI 18 0.00 1.14
## 19 KEN Koibos Gp NI 19 0.00 71.59
## 20 KEN Meru nat. parc Gp NI 20 22.99 70.11
## 21 KEN Kari Gmm NI 21 63.53 2.35
## 22 URT MaSAFng-URTga Gmm NI 22 76.54 53.09
## 23 KEN Ruma nat. parc Gp NI 23 26.25 17.50
## 24 GHA Walewale Gt M 24 0.00 53.85
## 25 BKF Moussodougou Gpg F 25 0.00 44.87
## 26 ZIM Makuti Gmm NI 26 26.92 91.03
## 27 SAF False Bay Park Ga NI 27 0.00 2.60
## 28 BKF Comoe Gmsm M 28 0.00 10.67
## 29 BKF Folonzo Gmsm M 29 0.00 40.00
## 30 BKF Comoe Gpg F 30 0.00 2.82
## 31 URT MaSAFng-URTga Gp NI 31 66.20 73.24
## 32 BKF Kartasso Gpg F 32 0.00 0.00
## 33 BKF Kartasso Gpg M 33 0.00 0.00
## 34 SEN DiackSAFo Peulh Gpg NI 34 0.00 7.69
## 35 BKF Moussodougou Gpg M 35 0.00 21.88
## 37 BKF Comoe Gmed M 37 6.56 24.59
## 38 KEN Emsos Gp NI 38 0.00 93.33
## 39 BKF Folonzo Gmsm F 39 1.69 20.34
## 40 MLI Bani Gpg F 40 0.00 1.72
## 41 SAF SAFint Lucia Ga NI 41 0.00 38.60
## 42 UGA Budaka Gp NI 42 94.55 7.27
## 43 GHA Walewale Gt F 43 0.00 66.04
## 44 BKF Arly Gt F 44 0.00 1.89
## 45 BKF Kampty Gpg F 45 0.00 90.57
## 46 SAF Lower Mkhuze Ga NI 46 0.00 43.40
## 47 BKF Comoe Gpg M 47 0.00 1.92
## 48 MLI SEN Gpg M 48 0.00 7.69
## 49 KEN Ikapolok Gff NI 49 39.22 37.25
## 50 SAF Hluhluwe Gb NI 50 0.00 32.00
## 51 SAF North eastern KwaZulu-Natal Gb NI 51 0.00 4.00
## 52 MOZ Reserva Especial de Maputo Gb NI 52 14.00 6.00
## 53 MOZ Reserva Especial de Maputo Ga NI 53 0.00 10.00
## 54 BKF Bama Gpg F 54 0.00 0.00
## 55 BKF Arly Gt M 55 0.00 0.00
## 56 SEN Tambacounda Gpg F 56 0.00 41.46
## 57 SEN Tambacounda Gpg M 57 0.00 71.79
## 58 SEN SebikoURTe Gpg NI 58 0.00 5.13
## 59 SAF North eastern KwaZulu-Natal Ga NI 59 5.13 5.13
## 60 ZIM Makuti Gp NI 60 15.79 86.84
## 61 KEN Obekai Gff NI 61 0.00 5.26
## 62 MLI SEN Gpg F 62 0.00 0.00
## 63 ZAI ZAI Gpp NI 63 11.43 2.86
## 64 BKF Bama Gpg M 64 0.00 0.00
## 65 MLI Banco Gpg F 65 0.00 20.59
## 66 BKF Dedougou Gpg F 66 0.00 52.94
## 67 MLI Sikasso Gpg F 67 0.00 6.06
## 68 BKF Comoe Gmed F 68 12.12 51.52
## 69 GHA MorURTi Gt M 69 0.00 50.00
## 70 BKF Sissili Gt M 70 0.00 25.00
## 71 GUI Kangoliya Gpg M 71 0.00 0.00
## 72 BKF Folonzo Gmed F 72 0.00 50.00
## 73 BKF Folonzo Gmed M 73 0.00 46.67
## 74 SAF SAFint Lucia Gb NI 74 0.00 43.33
## 75 SWA Mlawula Nature Reserve Ga NI 75 0.00 0.00
## 76 URT Uguja island Ga NI 76 6.67 10.00
## 77 GUI Mini Gpg F 77 0.00 3.45
## 78 SEN Hann Gpg NI 78 0.00 0.00
## 79 UGA Omugo Gp NI 79 100.00 0.00
## 80 BKF Kampty Gpg M 80 0.00 80.77
## 81 ZIM Mushumb Gp NI 81 3.85 19.23
## 82 GUI Kifala Gpg M 82 0.00 0.00
## 83 MLI Sikasso Gpg M 83 0.00 0.00
## 84 MLI SS Gpg F 84 0.00 4.00
## 85 UGA Lira Gp NI 85 0.00 16.00
## 86 BKF Kenedougou Gpg F 86 0.00 0.00
## 87 MLI SS Gpg M 87 0.00 0.00
## 88 BKF Dedougou Gpg M 88 0.00 69.57
## 89 GUI Bafing Gpg F 89 0.00 5.00
## 90 KEN Kiria Gp NI 90 0.00 80.00
## 91 BKF Kampty Gpg NI 91 0.00 84.21
## 92 GUI Tinkisso Gpg M 92 0.00 5.56
## 93 ZIM Kemukura Gmm NI 93 22.22 5.56
## 94 BKF Kenedougou Gpg M 94 0.00 0.00
## 95 GHA Bougouhiya Gt F 95 0.00 18.75
## 96 GUI Dekonkore Gpg F 96 0.00 6.25
## 97 GUI Mini Gpg M 97 0.00 0.00
## 98 SEN Fleuve Gambie Gpg M 98 0.00 43.75
## 99 BKF Sissili Gt F 99 0.00 13.33
## 100 ZIM Rukomeshi Gmm NI 100 20.00 0.00
## 101 KEN Mwea nat. parc Gp NI 101 0.00 13.33
## 102 GUI Bafing Gpg M 102 0.00 0.00
## 103 GUI Tinkisso Gpg F 103 0.00 7.69
## 104 BKF Bouroum bouroum Gpg F 104 0.00 92.31
## 105 ZIM Mukondore Gmm NI 105 23.08 7.69
## 106 GUI Karifale Gpg M 106 0.00 8.33
## 107 GUI Lemonako Gpg F 107 0.00 0.00
## 108 BKF KouriGUIon Gpg F 108 0.00 50.00
## 109 MLI Bani Gpg M 109 0.00 0.00
## 110 MLI Sybi Gpg F 110 0.00 0.00
## 111 MLI Sybi Gpg M 111 0.00 0.00
## 112 GHA MorURTi Gt F 112 0.00 66.67
## 113 SEN Fleueve G Gpg F 113 0.00 11.11
## 114 BKF KouriGUIon Gpg NI 114 0.00 22.22
## 115 ZIM M. chiuyi Gmm NI 115 11.11 0.00
## 116 GHA Fumbissi Gt F 116 0.00 100.00
## 117 GUI Lemonako Gpg M 117 0.00 0.00
## 118 UGA Moyo Gp NI 118 87.50 12.50
## 119 SEN Diaguiri Gpg F 119 0.00 0.00
## 120 MLI Banco Gpg M 120 0.00 28.57
## 121 MLI Baoule Gpg F 121 0.00 42.86
## 122 MLI Baoule Gpg M 122 0.00 42.86
## 123 MLI Bougouni Gpg M 123 0.00 0.00
## 124 BKF Lorepeni Gpg F 124 0.00 71.43
## 125 GHA Fumbissi Gt M 125 0.00 100.00
## 126 GHA Grogro Gt M 126 0.00 100.00
## 127 SEN MousSAFlla Gpg M 127 0.00 0.00
## 128 MLI Baguineda Gpg F 128 0.00 16.67
## 129 MLI Bougouni Gpg F 129 0.00 0.00
## 130 MLI Kita Gpg M 130 0.00 16.67
## 131 ZIM Mushumb Gmm NI 131 0.00 33.33
## 132 URT Zanzibar Ga NI 132 16.67 0.00
## 133 GHA Grogro Gt F 133 0.00 100.00
## 134 GHA Kumpole Gt F 134 0.00 100.00
## 135 GHA Sissili Bidge Gt F 135 0.00 100.00
## 136 GUI Kifala Gpg F 136 0.00 0.00
## 137 BKF Bouroum bouroum Gpg M 137 0.00 80.00
## 138 SEN Fleuve Gambie Gpg F 138 0.00 25.00
## 139 ZIM Rukomeshi Gp NI 139 0.00 0.00
## 140 ZIM Gokwe Gp NI 140 0.00 0.00
## 141 URT Jozani Ga NI 141 0.00 25.00
## 142 GHA Bougouhiya Gt M 142 0.00 0.00
## 143 SEN Niokolo Gpg M 143 0.00 0.00
## 144 BKF Sissili Gmsm M 144 0.00 0.00
## 145 BKF Lorepeni Gpg M 145 0.00 100.00
## 146 BKF KouriGUIon Gpg M 146 0.00 66.67
## 147 BKF Ouarkoye Gpg M 147 0.00 100.00
## 148 GHA Kumpole Gt M 148 0.00 100.00
## 149 GHA Psikp_ Gt M 149 0.00 100.00
## 150 SEN Diaguiri Gpg M 150 0.00 50.00
## 151 BKF Ouarkoye Gpg F 151 0.00 100.00
## 152 GHA Kandiaga Gt M 152 0.00 100.00
## 153 GHA Sissili Bidge Gt M 153 0.00 100.00
## 154 GHA Nabogo Gt F 154 0.00 0.00
## 155 GHA Volta Blanche Gt F 155 0.00 0.00
## 156 GUI Karifale Gpg F 156 0.00 0.00
## 157 SEN Mako Gpg M 157 0.00 100.00
## Prev_Tc Prev_Tv Prev_Tz Prev_Tsg Prev_TcTv Prev_TcTz Prev_TcTsg Prev_TvTz
## 1 6.10 0.65 1.09 10.46 0.00 0.00 0.65 0.00
## 2 1.10 13.24 0.37 0.00 0.74 1.10 0.00 0.00
## 3 3.64 11.36 0.00 0.00 0.00 0.00 0.00 0.00
## 4 1.51 2.01 0.50 3.02 0.00 0.00 0.00 0.00
## 5 21.54 15.38 0.51 26.15 6.67 1.54 15.90 1.03
## 6 7.18 0.51 1.03 7.69 1.03 0.51 0.51 0.00
## 7 0.00 0.00 0.00 0.00 0.00 0.00 0.00 0.00
## 8 1.37 0.68 0.68 34.93 0.00 0.00 7.53 0.00
## 9 6.16 2.74 0.68 8.22 0.00 0.00 0.68 0.00
## 10 5.34 3.05 0.00 0.00 0.00 0.76 0.00 0.00
## 11 1.89 12.26 1.89 0.00 1.89 0.94 0.00 0.00
## 12 0.94 2.83 1.89 0.00 0.00 0.00 0.00 1.89
## 13 0.00 5.66 5.66 0.00 0.00 1.89 0.00 2.83
## 14 2.11 27.37 1.05 0.00 0.00 1.05 0.00 1.05
## 15 0.00 0.00 0.00 0.00 0.00 0.00 0.00 0.00
## 16 3.19 2.13 1.06 3.19 0.00 0.00 1.06 0.00
## 17 1.06 0.00 1.06 0.00 0.00 0.00 0.00 0.00
## 18 0.00 0.00 0.00 1.14 0.00 0.00 0.00 0.00
## 19 15.91 9.09 0.00 28.41 0.00 0.00 15.91 0.00
## 20 29.89 4.60 0.00 25.29 0.00 0.00 10.34 0.00
## 21 2.35 0.00 0.00 0.00 0.00 0.00 0.00 0.00
## 22 18.52 1.23 1.23 18.52 0.00 0.00 6.17 0.00
## 23 10.00 2.50 2.50 0.00 1.25 0.00 0.00 0.00
## 24 3.85 12.82 8.97 0.00 0.00 10.26 0.00 14.10
## 25 0.00 20.51 12.82 0.00 0.00 0.00 0.00 11.54
## 26 11.54 0.00 2.56 69.23 0.00 0.00 7.69 0.00
## 27 2.60 0.00 0.00 0.00 0.00 0.00 0.00 0.00
## 28 5.33 2.67 1.33 0.00 0.00 1.33 0.00 0.00
## 29 5.33 34.67 0.00 0.00 0.00 0.00 0.00 0.00
## 30 1.41 1.41 0.00 0.00 0.00 0.00 0.00 0.00
## 31 33.80 0.00 0.00 14.08 0.00 1.41 21.13 1.41
## 32 0.00 0.00 0.00 0.00 0.00 0.00 0.00 0.00
## 33 0.00 0.00 0.00 0.00 0.00 0.00 0.00 0.00
## 34 0.00 1.54 1.54 4.62 0.00 0.00 0.00 0.00
## 35 0.00 6.25 15.63 0.00 0.00 0.00 0.00 0.00
## 37 6.56 13.11 4.92 0.00 0.00 0.00 0.00 0.00
## 38 15.00 8.33 0.00 58.33 1.67 0.00 10.00 0.00
## 39 5.08 11.86 1.69 0.00 0.00 1.69 0.00 0.00
## 40 0.00 1.72 0.00 0.00 0.00 0.00 0.00 0.00
## 41 10.53 0.00 10.53 15.79 0.00 0.00 1.75 0.00
## 42 1.82 0.00 0.00 5.45 0.00 0.00 0.00 0.00
## 43 1.89 9.43 24.53 0.00 0.00 16.98 0.00 7.55
## 44 0.00 0.00 1.89 0.00 0.00 0.00 0.00 0.00
## 45 1.89 62.26 1.89 11.32 0.00 0.00 0.00 0.00
## 46 9.43 1.89 3.77 24.53 1.89 0.00 1.89 0.00
## 47 1.92 0.00 0.00 0.00 0.00 0.00 0.00 0.00
## 48 1.92 1.92 3.85 0.00 0.00 0.00 0.00 0.00
## 49 1.96 9.80 0.00 19.61 3.92 1.96 0.00 0.00
## 50 12.00 2.00 14.00 4.00 0.00 0.00 0.00 0.00
## 51 2.00 0.00 0.00 2.00 0.00 0.00 0.00 0.00
## 52 0.00 2.00 0.00 2.00 0.00 0.00 0.00 0.00
## 53 6.00 0.00 0.00 4.00 0.00 0.00 0.00 0.00
## 54 0.00 0.00 0.00 0.00 0.00 0.00 0.00 0.00
## 55 0.00 0.00 0.00 0.00 0.00 0.00 0.00 0.00
## 56 0.00 26.83 7.32 0.00 0.00 0.00 0.00 7.32
## 57 0.00 53.85 2.56 0.00 0.00 0.00 0.00 15.38
## 58 0.00 5.13 0.00 0.00 0.00 0.00 0.00 0.00
## 59 2.56 0.00 0.00 2.56 0.00 0.00 0.00 0.00
## 60 7.89 0.00 0.00 73.68 0.00 0.00 5.26 0.00
## 61 2.63 2.63 0.00 0.00 0.00 0.00 0.00 0.00
## 62 0.00 0.00 0.00 0.00 0.00 0.00 0.00 0.00
## 63 0.00 2.86 0.00 0.00 0.00 0.00 0.00 0.00
## 64 0.00 0.00 0.00 0.00 0.00 0.00 0.00 0.00
## 65 0.00 20.59 0.00 0.00 0.00 0.00 0.00 0.00
## 66 0.00 26.47 0.00 23.53 0.00 0.00 0.00 0.00
## 67 0.00 0.00 6.06 0.00 0.00 0.00 0.00 0.00
## 68 30.30 18.18 0.00 0.00 0.00 0.00 0.00 0.00
## 69 0.00 15.63 15.63 0.00 0.00 18.75 0.00 0.00
## 70 12.50 12.50 0.00 0.00 0.00 0.00 0.00 0.00
## 71 0.00 0.00 0.00 0.00 0.00 0.00 0.00 0.00
## 72 0.00 13.33 26.67 0.00 0.00 3.33 0.00 3.33
## 73 0.00 0.00 33.33 0.00 6.67 3.33 0.00 0.00
## 74 0.00 3.33 3.33 36.67 0.00 0.00 0.00 0.00
## 75 0.00 0.00 0.00 0.00 0.00 0.00 0.00 0.00
## 76 0.00 6.67 3.33 0.00 0.00 0.00 0.00 0.00
## 77 0.00 3.45 0.00 0.00 0.00 0.00 0.00 0.00
## 78 0.00 0.00 0.00 0.00 0.00 0.00 0.00 0.00
## 79 0.00 0.00 0.00 0.00 0.00 0.00 0.00 0.00
## 80 0.00 65.38 0.00 7.69 0.00 0.00 0.00 0.00
## 81 3.85 0.00 7.69 3.85 0.00 0.00 3.85 0.00
## 82 0.00 0.00 0.00 0.00 0.00 0.00 0.00 0.00
## 83 0.00 0.00 0.00 0.00 0.00 0.00 0.00 0.00
## 84 0.00 4.00 0.00 0.00 0.00 0.00 0.00 0.00
## 85 8.00 0.00 4.00 4.00 0.00 0.00 0.00 0.00
## 86 0.00 0.00 0.00 0.00 0.00 0.00 0.00 0.00
## 87 0.00 0.00 0.00 0.00 0.00 0.00 0.00 0.00
## 88 4.35 30.43 13.04 4.35 0.00 0.00 4.35 0.00
## 89 0.00 5.00 0.00 0.00 0.00 0.00 0.00 0.00
## 90 55.00 5.00 0.00 10.00 10.00 0.00 0.00 0.00
## 91 0.00 26.32 5.26 21.05 0.00 0.00 0.00 0.00
## 92 0.00 5.56 0.00 0.00 0.00 0.00 0.00 0.00
## 93 0.00 5.56 0.00 0.00 0.00 0.00 0.00 0.00
## 94 0.00 0.00 0.00 0.00 0.00 0.00 0.00 0.00
## 95 0.00 6.25 0.00 0.00 0.00 0.00 0.00 12.50
## 96 0.00 6.25 0.00 0.00 0.00 0.00 0.00 0.00
## 97 0.00 0.00 0.00 0.00 0.00 0.00 0.00 0.00
## 98 0.00 43.75 0.00 0.00 0.00 0.00 0.00 0.00
## 99 6.67 6.67 0.00 0.00 0.00 0.00 0.00 0.00
## 100 0.00 0.00 0.00 0.00 0.00 0.00 0.00 0.00
## 101 13.33 0.00 0.00 0.00 0.00 0.00 0.00 0.00
## 102 0.00 0.00 0.00 0.00 0.00 0.00 0.00 0.00
## 103 0.00 7.69 0.00 0.00 0.00 0.00 0.00 0.00
## 104 0.00 53.85 0.00 23.08 0.00 0.00 0.00 0.00
## 105 7.69 0.00 0.00 0.00 0.00 0.00 0.00 0.00
## 106 0.00 8.33 0.00 0.00 0.00 0.00 0.00 0.00
## 107 0.00 8.33 0.00 0.00 0.00 0.00 0.00 0.00
## 108 0.00 0.00 0.00 33.33 0.00 0.00 0.00 0.00
## 109 0.00 0.00 0.00 0.00 0.00 0.00 0.00 0.00
## 110 0.00 0.00 0.00 0.00 0.00 0.00 0.00 0.00
## 111 0.00 0.00 0.00 0.00 0.00 0.00 0.00 0.00
## 112 0.00 0.00 33.33 0.00 0.00 22.22 0.00 11.11
## 113 0.00 11.11 0.00 0.00 0.00 0.00 0.00 0.00
## 114 0.00 0.00 0.00 11.11 0.00 0.00 0.00 0.00
## 115 0.00 0.00 0.00 0.00 0.00 0.00 0.00 0.00
## 116 0.00 0.00 37.50 0.00 0.00 0.00 0.00 62.50
## 117 0.00 0.00 0.00 0.00 0.00 0.00 0.00 0.00
## 118 0.00 0.00 0.00 12.50 0.00 0.00 0.00 0.00
## 119 0.00 0.00 0.00 0.00 0.00 0.00 0.00 0.00
## 120 0.00 28.57 0.00 0.00 0.00 0.00 0.00 0.00
## 121 0.00 42.86 0.00 0.00 0.00 0.00 0.00 0.00
## 122 0.00 42.86 0.00 0.00 0.00 0.00 0.00 0.00
## 123 0.00 0.00 0.00 0.00 0.00 0.00 0.00 0.00
## 124 0.00 14.29 0.00 28.57 0.00 0.00 0.00 0.00
## 125 0.00 66.67 33.33 0.00 0.00 0.00 0.00 0.00
## 126 0.00 0.00 16.67 0.00 0.00 0.00 0.00 83.33
## 127 0.00 0.00 0.00 0.00 0.00 0.00 0.00 0.00
## 128 0.00 16.67 0.00 0.00 0.00 0.00 0.00 0.00
## 129 0.00 0.00 0.00 0.00 0.00 0.00 0.00 0.00
## 130 0.00 16.67 0.00 0.00 0.00 0.00 0.00 0.00
## 131 16.67 0.00 0.00 16.67 0.00 0.00 0.00 0.00
## 132 0.00 0.00 0.00 0.00 0.00 0.00 0.00 0.00
## 133 0.00 80.00 20.00 0.00 0.00 0.00 0.00 0.00
## 134 0.00 40.00 60.00 0.00 0.00 0.00 0.00 0.00
## 135 0.00 20.00 80.00 0.00 0.00 0.00 0.00 0.00
## 136 0.00 0.00 0.00 0.00 0.00 0.00 0.00 0.00
## 137 0.00 40.00 0.00 20.00 0.00 0.00 0.00 0.00
## 138 0.00 25.00 0.00 0.00 0.00 0.00 0.00 0.00
## 139 0.00 0.00 0.00 0.00 0.00 0.00 0.00 0.00
## 140 0.00 0.00 0.00 0.00 0.00 0.00 0.00 0.00
## 141 0.00 0.00 25.00 0.00 0.00 0.00 0.00 0.00
## 142 0.00 0.00 0.00 0.00 0.00 0.00 0.00 0.00
## 143 0.00 66.67 0.00 0.00 0.00 0.00 0.00 0.00
## 144 0.00 0.00 0.00 0.00 0.00 0.00 0.00 0.00
## 145 0.00 0.00 0.00 0.00 0.00 0.00 0.00 0.00
## 146 0.00 33.33 0.00 0.00 0.00 0.00 0.00 0.00
## 147 0.00 33.33 0.00 0.00 0.00 0.00 0.00 0.00
## 148 0.00 50.00 50.00 0.00 0.00 0.00 0.00 0.00
## 149 0.00 0.00 50.00 0.00 0.00 0.00 0.00 50.00
## 150 0.00 0.00 50.00 0.00 0.00 0.00 0.00 0.00
## 151 50.00 50.00 0.00 0.00 0.00 0.00 0.00 0.00
## 152 0.00 0.00 100.00 0.00 0.00 0.00 0.00 0.00
## 153 0.00 0.00 100.00 0.00 0.00 0.00 0.00 0.00
## 154 0.00 0.00 0.00 0.00 0.00 0.00 0.00 0.00
## 155 0.00 0.00 0.00 0.00 0.00 0.00 0.00 0.00
## 156 0.00 0.00 0.00 0.00 0.00 0.00 0.00 0.00
## 157 0.00 100.00 0.00 0.00 0.00 0.00 0.00 0.00
## Prev_TvTsg Prev_TzTsg Prev_TcTvTz
## 1 0.44 0.65 0.00
## 2 0.00 0.00 0.00
## 3 0.00 0.00 0.00
## 4 0.00 0.00 0.00
## 5 0.00 0.00 0.00
## 6 0.00 1.03 0.00
## 7 0.00 0.00 0.00
## 8 0.00 0.00 0.00
## 9 0.68 0.68 0.00
## 10 0.00 0.00 0.00
## 11 0.00 0.00 0.00
## 12 0.00 0.00 0.00
## 13 0.00 0.00 0.00
## 14 0.00 0.00 0.00
## 15 0.00 0.00 0.00
## 16 0.00 0.00 0.00
## 17 0.00 0.00 0.00
## 18 0.00 0.00 0.00
## 19 0.00 2.27 0.00
## 20 0.00 0.00 0.00
## 21 0.00 0.00 0.00
## 22 6.17 1.23 0.00
## 23 1.25 0.00 0.00
## 24 0.00 0.00 1.28
## 25 0.00 0.00 0.00
## 26 0.00 0.00 0.00
## 27 0.00 0.00 0.00
## 28 0.00 0.00 0.00
## 29 0.00 0.00 0.00
## 30 0.00 0.00 0.00
## 31 0.00 1.41 0.00
## 32 0.00 0.00 0.00
## 33 0.00 0.00 0.00
## 34 0.00 0.00 0.00
## 35 0.00 0.00 0.00
## 37 0.00 0.00 0.00
## 38 0.00 0.00 0.00
## 39 0.00 0.00 0.00
## 40 0.00 0.00 0.00
## 41 0.00 0.00 0.00
## 42 0.00 0.00 0.00
## 43 0.00 0.00 5.66
## 44 0.00 0.00 0.00
## 45 9.43 3.77 0.00
## 46 0.00 0.00 0.00
## 47 0.00 0.00 0.00
## 48 0.00 0.00 0.00
## 49 0.00 0.00 0.00
## 50 0.00 0.00 0.00
## 51 0.00 0.00 0.00
## 52 2.00 0.00 0.00
## 53 0.00 0.00 0.00
## 54 0.00 0.00 0.00
## 55 0.00 0.00 0.00
## 56 0.00 0.00 0.00
## 57 0.00 0.00 0.00
## 58 0.00 0.00 0.00
## 59 0.00 0.00 0.00
## 60 0.00 0.00 0.00
## 61 0.00 0.00 0.00
## 62 0.00 0.00 0.00
## 63 0.00 0.00 0.00
## 64 0.00 0.00 0.00
## 65 0.00 0.00 0.00
## 66 2.94 0.00 0.00
## 67 0.00 0.00 0.00
## 68 0.00 0.00 0.00
## 69 0.00 0.00 0.00
## 70 0.00 0.00 0.00
## 71 0.00 0.00 0.00
## 72 0.00 0.00 3.33
## 73 0.00 0.00 3.33
## 74 0.00 0.00 0.00
## 75 0.00 0.00 0.00
## 76 0.00 0.00 0.00
## 77 0.00 0.00 0.00
## 78 0.00 0.00 0.00
## 79 0.00 0.00 0.00
## 80 7.69 0.00 0.00
## 81 0.00 0.00 0.00
## 82 0.00 0.00 0.00
## 83 0.00 0.00 0.00
## 84 0.00 0.00 0.00
## 85 0.00 0.00 0.00
## 86 0.00 0.00 0.00
## 87 0.00 0.00 0.00
## 88 4.35 8.70 0.00
## 89 0.00 0.00 0.00
## 90 0.00 0.00 0.00
## 91 31.58 0.00 0.00
## 92 0.00 0.00 0.00
## 93 0.00 0.00 0.00
## 94 0.00 0.00 0.00
## 95 0.00 0.00 0.00
## 96 0.00 0.00 0.00
## 97 0.00 0.00 0.00
## 98 0.00 0.00 0.00
## 99 0.00 0.00 0.00
## 100 0.00 0.00 0.00
## 101 0.00 0.00 0.00
## 102 0.00 0.00 0.00
## 103 0.00 0.00 0.00
## 104 15.38 0.00 0.00
## 105 0.00 0.00 0.00
## 106 0.00 0.00 0.00
## 107 0.00 0.00 0.00
## 108 16.67 0.00 0.00
## 109 0.00 0.00 0.00
## 110 0.00 0.00 0.00
## 111 0.00 0.00 0.00
## 112 0.00 0.00 0.00
## 113 0.00 0.00 0.00
## 114 11.11 0.00 0.00
## 115 0.00 0.00 0.00
## 116 0.00 0.00 0.00
## 117 0.00 0.00 0.00
## 118 0.00 0.00 0.00
## 119 0.00 0.00 0.00
## 120 0.00 0.00 0.00
## 121 0.00 0.00 0.00
## 122 0.00 0.00 0.00
## 123 0.00 0.00 0.00
## 124 28.57 0.00 0.00
## 125 0.00 0.00 0.00
## 126 0.00 0.00 0.00
## 127 0.00 0.00 0.00
## 128 0.00 0.00 0.00
## 129 0.00 0.00 0.00
## 130 0.00 0.00 0.00
## 131 0.00 0.00 0.00
## 132 0.00 0.00 0.00
## 133 0.00 0.00 0.00
## 134 0.00 0.00 0.00
## 135 0.00 0.00 0.00
## 136 0.00 0.00 0.00
## 137 20.00 0.00 0.00
## 138 0.00 0.00 0.00
## 139 0.00 0.00 0.00
## 140 0.00 0.00 0.00
## 141 0.00 0.00 0.00
## 142 0.00 0.00 0.00
## 143 0.00 0.00 0.00
## 144 0.00 0.00 0.00
## 145 66.67 33.33 0.00
## 146 33.33 0.00 0.00
## 147 33.33 33.33 0.00
## 148 0.00 0.00 0.00
## 149 0.00 0.00 0.00
## 150 0.00 0.00 0.00
## 151 0.00 0.00 0.00
## 152 0.00 0.00 0.00
## 153 0.00 0.00 0.00
## 154 0.00 0.00 0.00
## 155 0.00 0.00 0.00
## 156 0.00 0.00 0.00
## 157 0.00 0.00 0.00

## Statistics showen in the mansucript consequently

model1<-glm((Prev_Tspp) ~ Country,data=data, family=gaussian())
model2<-glm((Prev_Tspp) ~ Species,data=data, family=gaussian())
model3<-glm((Prev_Tspp) ~ Country*Species,data=data, family=gaussian())
model4<-glm((Prev_Tspp) ~ Country+Species,data=data, family=gaussian())
model5<-glm((Prev_Tspp) ~ Country*Species+Localisation,data=data, family=gaussian())
model6<-glm((Prev_Tspp) ~ Country+Species+Localisation,data=data, family=gaussian())

#AICc(model1, model2, model3, model4)
model.set <- list(model1, model2, model3, model4, model5, model6)
model.names <- c("model1", "model2","model3", "model4", "model5", "model6")

aictab(model.set, modnames = model.names)

##
## Model selection based on AICc:
##
## K AICc Delta_AICc AICcWt Cum.Wt LL
## model1 16 1521.35 0.00 0.9 0.9 -742.72
## model4 23 1525.81 4.46 0.1 1.0 -735.72
## model3 27 1534.50 13.15 0.0 1.0 -734.34
## model2 11 1545.55 24.20 0.0 1.0 -760.86
## model6 100 1571.61 50.26 0.0 1.0 -502.17
## model5 103 1614.79 93.44 0.0 1.0 -498.39

summary(model1)

##
## Call:
## glm(formula = (Prev_Tspp) ~ Country, family = gaussian(), data = data)
##
## Deviance Residuals:
## Min 1Q Median 3Q Max
## -69.739 -19.625 -2.419 17.636 75.726
##
## Coefficients:
## Estimate Std. Error t value Pr(>|t|)
## (Intercept) 35.627 4.536 7.855 9.24e-13 ***
## CountryETH -15.587 30.088 -0.518 0.605225
## CountryGHA 34.112 8.350 4.085 7.35e-05 ***
## CountryGUI -33.209 8.919 -3.723 0.000284 ***
## CountryKEN 6.128 9.711 0.631 0.529059
## CountryMLI -25.200 8.350 -3.018 0.003021 **
## CountryMOZ -27.627 21.516 -1.284 0.201227
## CountrySAF -14.495 11.453 -1.266 0.207727
## CountrySEN -11.353 8.919 -1.273 0.205148
## CountrySWA -35.627 30.088 -1.184 0.238360
## CountryUGA -26.345 14.054 -1.875 0.062918 .
## CountryURT -5.429 12.962 -0.419 0.675975
## CountryZAI -32.767 30.088 -1.089 0.277985
## CountryZAM 9.583 30.088 0.318 0.750587
## CountryZIM -11.259 10.442 -1.078 0.282769
## ---
## Signif. codes: 0 '***' 0.001 '**' 0.01 '*' 0.05 '.' 0.1 ' ' 1
##
## (Dispersion parameter for gaussian family taken to be 884.7024)
##
## Null deviance: 180975 on 155 degrees of freedom
## Residual deviance: 124743 on 141 degrees of freedom
## AIC: 1517.4
##
## Number of Fisher Scoring iterations: 2

Anova(model1)

## Analysis of Deviance Table (Type II tests)
##
## Response: (Prev_Tspp)
## LR Chisq Df Pr(>Chisq)
## Country 63.56 14 2.76e-08 ***
## ---
## Signif. codes: 0 '***' 0.001 '**' 0.01 '*' 0.05 '.' 0.1 ' ' 1

Anova(model2)

## Analysis of Deviance Table (Type II tests)
##
## Response: (Prev_Tspp)
## LR Chisq Df Pr(>Chisq)
## Species 21.863 9 0.009324 **
## ---
## Signif. codes: 0 '***' 0.001 '**' 0.01 '*' 0.05 '.' 0.1 ' ' 1

#-----------------------------------------------------------------------
#impact of taxa and countries

# statistics in the manuscript
data_ga <- subset(data, Species=="Ga")
data_ga

## Country Localisation Species Sex Sample Prev_Sod Prev_Tspp
## 27 SAF False Bay Park Ga NI 27 0.00 2.60
## 41 SAF SAFint Lucia Ga NI 41 0.00 38.60
## 46 SAF Lower Mkhuze Ga NI 46 0.00 43.40
## 53 MOZ Reserva Especial de Maputo Ga NI 53 0.00 10.00
## 59 SAF North eastern KwaZulu-Natal Ga NI 59 5.13 5.13
## 75 SWA Mlawula Nature Reserve Ga NI 75 0.00 0.00
## 76 URT Uguja island Ga NI 76 6.67 10.00
## 132 URT Zanzibar Ga NI 132 16.67 0.00
## 141 URT Jozani Ga NI 141 0.00 25.00
## Prev_Tc Prev_Tv Prev_Tz Prev_Tsg Prev_TcTv Prev_TcTz Prev_TcTsg Prev_TvTz
## 27 2.60 0.00 0.00 0.00 0.00 0 0.00 0
## 41 10.53 0.00 10.53 15.79 0.00 0 1.75 0
## 46 9.43 1.89 3.77 24.53 1.89 0 1.89 0
## 53 6.00 0.00 0.00 4.00 0.00 0 0.00 0
## 59 2.56 0.00 0.00 2.56 0.00 0 0.00 0
## 75 0.00 0.00 0.00 0.00 0.00 0 0.00 0
## 76 0.00 6.67 3.33 0.00 0.00 0 0.00 0
## 132 0.00 0.00 0.00 0.00 0.00 0 0.00 0
## 141 0.00 0.00 25.00 0.00 0.00 0 0.00 0
## Prev_TvTsg Prev_TzTsg Prev_TcTvTz
## 27 0 0 0
## 41 0 0 0
## 46 0 0 0
## 53 0 0 0
## 59 0 0 0
## 75 0 0 0
## 76 0 0 0
## 132 0 0 0
## 141 0 0 0

model1<-glm((Prev_Tspp) ~ Country,data=data_ga, family=gaussian())
summary(model1)

##
## Call:
## glm(formula = (Prev_Tspp) ~ Country, family = gaussian(), data = data_ga)
##
## Deviance Residuals:
## 27 41 46 53 59 75 76 132
## -19.832 16.168 20.968 0.000 -17.302 0.000 -1.667 -11.667
## 141
## 13.333
##
## Coefficients:
## Estimate Std. Error t value Pr(>|t|)
## (Intercept) 10.000 18.495 0.541 0.612
## CountrySAF 12.433 20.678 0.601 0.574
## CountrySWA -10.000 26.156 -0.382 0.718
## CountryURT 1.667 21.357 0.078 0.941
##
## (Dispersion parameter for gaussian family taken to be 342.0791)
##
## Null deviance: 2214.7 on 8 degrees of freedom
## Residual deviance: 1710.4 on 5 degrees of freedom
## AIC: 82.766
##
## Number of Fisher Scoring iterations: 2

Anova(model1)

## Analysis of Deviance Table (Type II tests)
##
## Response: (Prev_Tspp)
## LR Chisq Df Pr(>Chisq)
## Country 1.4742 3 0.6882

#----------------------------------------------
data_gb <- subset(data, Species=="Gb")
data_gb

## Country Localisation Species Sex Sample Prev_Sod Prev_Tspp
## 7 SAF Phinda Gb NI 7 4.12 0.00
## 50 SAF Hluhluwe Gb NI 50 0.00 32.00
## 51 SAF North eastern KwaZulu-Natal Gb NI 51 0.00 4.00
## 52 MOZ Reserva Especial de Maputo Gb NI 52 14.00 6.00
## 74 SAF SAFint Lucia Gb NI 74 0.00 43.33
## Prev_Tc Prev_Tv Prev_Tz Prev_Tsg Prev_TcTv Prev_TcTz Prev_TcTsg Prev_TvTz
## 7 0 0.00 0.00 0.00 0 0 0 0
## 50 12 2.00 14.00 4.00 0 0 0 0
## 51 2 0.00 0.00 2.00 0 0 0 0
## 52 0 2.00 0.00 2.00 0 0 0 0
## 74 0 3.33 3.33 36.67 0 0 0 0
## Prev_TvTsg Prev_TzTsg Prev_TcTvTz
## 7 0 0 0
## 50 0 0 0
## 51 0 0 0
## 52 2 0 0
## 74 0 0 0

model1<-glm((Prev_Tspp) ~ Country,data=data_gb, family=gaussian())
summary(model1)

##
## Call:
## glm(formula = (Prev_Tspp) ~ Country, family = gaussian(), data = data_gb)
##
## Deviance Residuals:
## 7 50 51 52 74
## -19.83 12.17 -15.83 0.00 23.50
##
## Coefficients:
## Estimate Std. Error t value Pr(>|t|)
## (Intercept) 6.00 21.17 0.283 0.795
## CountrySAF 13.83 23.67 0.584 0.600
##
## (Dispersion parameter for gaussian family taken to be 448.0589)
##
## Null deviance: 1497.2 on 4 degrees of freedom
## Residual deviance: 1344.2 on 3 degrees of freedom
## AIC: 48.16
##
## Number of Fisher Scoring iterations: 2

Anova(model1)

## Analysis of Deviance Table (Type II tests)
##
## Response: (Prev_Tspp)
## LR Chisq Df Pr(>Chisq)
## Country 0.34163 1 0.5589

#-------------------------------------------
data_gff <- subset(data, Species=="Gff")
data_gff

## Country Localisation Species Sex Sample Prev_Sod Prev_Tspp Prev_Tc Prev_Tv
## 16 UGA Buvuma island Gff NI 16 4.26 10.64 3.19 2.13
## 49 KEN Ikapolok Gff NI 49 39.22 37.25 1.96 9.80
## 61 KEN Obekai Gff NI 61 0.00 5.26 2.63 2.63
## Prev_Tz Prev_Tsg Prev_TcTv Prev_TcTz Prev_TcTsg Prev_TvTz Prev_TvTsg
## 16 1.06 3.19 0.00 0.00 1.06 0 0
## 49 0.00 19.61 3.92 1.96 0.00 0 0
## 61 0.00 0.00 0.00 0.00 0.00 0 0
## Prev_TzTsg Prev_TcTvTz
## 16 0 0
## 49 0 0
## 61 0 0

model1<-glm((Prev_Tspp) ~ Country,data=data_gff, family=gaussian())
summary(model1)

##
## Call:
## glm(formula = (Prev_Tspp) ~ Country, family = gaussian(), data = data_gff)
##
## Deviance Residuals:
## 16 49 61
## 0.00 15.99 -15.99
##
## Coefficients:
## Estimate Std. Error t value Pr(>|t|)
## (Intercept) 21.26 16.00 1.329 0.411
## CountryUGA -10.61 27.70 -0.383 0.767
##
## (Dispersion parameter for gaussian family taken to be 511.68)
##
## Null deviance: 586.80 on 2 degrees of freedom
## Residual deviance: 511.68 on 1 degrees of freedom
## AIC: 29.931
##
## Number of Fisher Scoring iterations: 2

Anova(model1)

## Analysis of Deviance Table (Type II tests)
##
## Response: (Prev_Tspp)
## LR Chisq Df Pr(>Chisq)
## Country 0.14681 1 0.7016

#-------------------------------------------
data_gmm <- subset(data, Species=="Gmm")
data_gmm

## Country Localisation Species Sex Sample Prev_Sod Prev_Tspp Prev_Tc Prev_Tv
## 21 KEN Kari Gmm NI 21 63.53 2.35 2.35 0.00
## 22 URT MaSAFng-URTga Gmm NI 22 76.54 53.09 18.52 1.23
## 26 ZIM Makuti Gmm NI 26 26.92 91.03 11.54 0.00
## 93 ZIM Kemukura Gmm NI 93 22.22 5.56 0.00 5.56
## 100 ZIM Rukomeshi Gmm NI 100 20.00 0.00 0.00 0.00
## 105 ZIM Mukondore Gmm NI 105 23.08 7.69 7.69 0.00
## 115 ZIM M. chiuyi Gmm NI 115 11.11 0.00 0.00 0.00
## 131 ZIM Mushumb Gmm NI 131 0.00 33.33 16.67 0.00
## Prev_Tz Prev_Tsg Prev_TcTv Prev_TcTz Prev_TcTsg Prev_TvTz Prev_TvTsg
## 21 0.00 0.00 0 0 0.00 0 0.00
## 22 1.23 18.52 0 0 6.17 0 6.17
## 26 2.56 69.23 0 0 7.69 0 0.00
## 93 0.00 0.00 0 0 0.00 0 0.00
## 100 0.00 0.00 0 0 0.00 0 0.00
## 105 0.00 0.00 0 0 0.00 0 0.00
## 115 0.00 0.00 0 0 0.00 0 0.00
## 131 0.00 16.67 0 0 0.00 0 0.00
## Prev_TzTsg Prev_TcTvTz
## 21 0.00 0
## 22 1.23 0
## 26 0.00 0
## 93 0.00 0
## 100 0.00 0
## 105 0.00 0
## 115 0.00 0
## 131 0.00 0

model1<-glm((Prev_Tspp) ~ Country,data=data_gmm, family=gaussian())
summary(model1)

##
## Call:
## glm(formula = (Prev_Tspp) ~ Country, family = gaussian(), data = data_gmm)
##
## Deviance Residuals:
## 21 22 26 93 100 105 115 131
## 0.00 0.00 68.09 -17.38 -22.93 -15.24 -22.93 10.39
##
## Coefficients:
## Estimate Std. Error t value Pr(>|t|)
## (Intercept) 2.35 35.59 0.066 0.950
## CountryURT 50.74 50.32 1.008 0.360
## CountryZIM 20.59 38.44 0.536 0.615
##
## (Dispersion parameter for gaussian family taken to be 1266.263)
##
## Null deviance: 7652.9 on 7 degrees of freedom
## Residual deviance: 6331.3 on 5 degrees of freedom
## AIC: 84.094
##
## Number of Fisher Scoring iterations: 2

Anova(model1)

## Analysis of Deviance Table (Type II tests)
##
## Response: (Prev_Tspp)
## LR Chisq Df Pr(>Chisq)
## Country 1.0437 2 0.5934

#-----------------------------------------------
data_gp <- subset(data, Species=="Gp")
data_gp

## Country Localisation Species Sex Sample Prev_Sod Prev_Tspp Prev_Tc
## 1 ETH Arba minch, nech SAFr Gp NI 1 20.48 20.04 6.10
## 5 KEN Katotoi Gp NI 5 42.56 88.72 21.54
## 6 KEN Mwea Gp NI 6 3.08 19.49 7.18
## 8 ZAM Mfuwe Gp NI 8 2.05 45.21 1.37
## 9 URT URTzania Gp NI 9 78.77 19.86 6.16
## 17 KEN Kari Gp NI 17 89.36 2.13 1.06
## 19 KEN Koibos Gp NI 19 0.00 71.59 15.91
## 20 KEN Meru nat. parc Gp NI 20 22.99 70.11 29.89
## 23 KEN Ruma nat. parc Gp NI 23 26.25 17.50 10.00
## 31 URT MaSAFng-URTga Gp NI 31 66.20 73.24 33.80
## 38 KEN Emsos Gp NI 38 0.00 93.33 15.00
## 42 UGA Budaka Gp NI 42 94.55 7.27 1.82
## 60 ZIM Makuti Gp NI 60 15.79 86.84 7.89
## 79 UGA Omugo Gp NI 79 100.00 0.00 0.00
## 81 ZIM Mushumb Gp NI 81 3.85 19.23 3.85
## 85 UGA Lira Gp NI 85 0.00 16.00 8.00
## 90 KEN Kiria Gp NI 90 0.00 80.00 55.00
## 101 KEN Mwea nat. parc Gp NI 101 0.00 13.33 13.33
## 118 UGA Moyo Gp NI 118 87.50 12.50 0.00
## 139 ZIM Rukomeshi Gp NI 139 0.00 0.00 0.00
## 140 ZIM Gokwe Gp NI 140 0.00 0.00 0.00
## Prev_Tv Prev_Tz Prev_Tsg Prev_TcTv Prev_TcTz Prev_TcTsg Prev_TvTz
## 1 0.65 1.09 10.46 0.00 0.00 0.65 0.00
## 5 15.38 0.51 26.15 6.67 1.54 15.90 1.03
## 6 0.51 1.03 7.69 1.03 0.51 0.51 0.00
## 8 0.68 0.68 34.93 0.00 0.00 7.53 0.00
## 9 2.74 0.68 8.22 0.00 0.00 0.68 0.00
## 17 0.00 1.06 0.00 0.00 0.00 0.00 0.00
## 19 9.09 0.00 28.41 0.00 0.00 15.91 0.00
## 20 4.60 0.00 25.29 0.00 0.00 10.34 0.00
## 23 2.50 2.50 0.00 1.25 0.00 0.00 0.00
## 31 0.00 0.00 14.08 0.00 1.41 21.13 1.41
## 38 8.33 0.00 58.33 1.67 0.00 10.00 0.00
## 42 0.00 0.00 5.45 0.00 0.00 0.00 0.00
## 60 0.00 0.00 73.68 0.00 0.00 5.26 0.00
## 79 0.00 0.00 0.00 0.00 0.00 0.00 0.00
## 81 0.00 7.69 3.85 0.00 0.00 3.85 0.00
## 85 0.00 4.00 4.00 0.00 0.00 0.00 0.00
## 90 5.00 0.00 10.00 10.00 0.00 0.00 0.00
## 101 0.00 0.00 0.00 0.00 0.00 0.00 0.00
## 118 0.00 0.00 12.50 0.00 0.00 0.00 0.00
## 139 0.00 0.00 0.00 0.00 0.00 0.00 0.00
## 140 0.00 0.00 0.00 0.00 0.00 0.00 0.00
## Prev_TvTsg Prev_TzTsg Prev_TcTvTz
## 1 0.44 0.65 0
## 5 0.00 0.00 0
## 6 0.00 1.03 0
## 8 0.00 0.00 0
## 9 0.68 0.68 0
## 17 0.00 0.00 0
## 19 0.00 2.27 0
## 20 0.00 0.00 0
## 23 1.25 0.00 0
## 31 0.00 1.41 0
## 38 0.00 0.00 0
## 42 0.00 0.00 0
## 60 0.00 0.00 0
## 79 0.00 0.00 0
## 81 0.00 0.00 0
## 85 0.00 0.00 0
## 90 0.00 0.00 0
## 101 0.00 0.00 0
## 118 0.00 0.00 0
## 139 0.00 0.00 0
## 140 0.00 0.00 0

model1<-glm((Prev_Tspp) ~ Country,data=data_gp, family=gaussian())
summary(model1)

##
## Call:
## glm(formula = (Prev_Tspp) ~ Country, family = gaussian(), data = data_gp)
##
## Deviance Residuals:
## Min 1Q Median 3Q Max
## -48.56 -26.52 0.00 20.90 60.32
##
## Coefficients:
## Estimate Std. Error t value Pr(>|t|)
## (Intercept) 20.040 34.093 0.588 0.565
## CountryKEN 30.649 35.937 0.853 0.407
## CountryUGA -11.097 38.117 -0.291 0.775
## CountryURT 26.510 41.755 0.635 0.535
## CountryZAM 25.170 48.214 0.522 0.609
## CountryZIM 6.478 38.117 0.170 0.867
##
## (Dispersion parameter for gaussian family taken to be 1162.303)
##
## Null deviance: 23227 on 20 degrees of freedom
## Residual deviance: 17435 on 15 degrees of freedom
## AIC: 214.75
##
## Number of Fisher Scoring iterations: 2

Anova(model1)

## Analysis of Deviance Table (Type II tests)
##
## Response: (Prev_Tspp)
## LR Chisq Df Pr(>Chisq)
## Country 4.9833 5 0.4179

#-----------------------------------------------
data_gpg <- subset(data, Species=="Gpg")
data_gpg

## Country Localisation Species Sex Sample Prev_Sod Prev_Tspp Prev_Tc
## 4 SEN Pout Gpg NI 4 0.00 7.04 1.51
## 12 BKF Folonzo Gpg F 12 0.00 7.55 0.94
## 13 BKF Folonzo Gpg M 13 1.89 16.04 0.00
## 15 GUI Kangoliya Gpg F 15 95.74 0.00 0.00
## 18 SEN Kayar Gpg NI 18 0.00 1.14 0.00
## 25 BKF Moussodougou Gpg F 25 0.00 44.87 0.00
## 30 BKF Comoe Gpg F 30 0.00 2.82 1.41
## 32 BKF Kartasso Gpg F 32 0.00 0.00 0.00
## 33 BKF Kartasso Gpg M 33 0.00 0.00 0.00
## 34 SEN DiackSAFo Peulh Gpg NI 34 0.00 7.69 0.00
## 35 BKF Moussodougou Gpg M 35 0.00 21.88 0.00
## 40 MLI Bani Gpg F 40 0.00 1.72 0.00
## 45 BKF Kampty Gpg F 45 0.00 90.57 1.89
## 47 BKF Comoe Gpg M 47 0.00 1.92 1.92
## 48 MLI SEN Gpg M 48 0.00 7.69 1.92
## 54 BKF Bama Gpg F 54 0.00 0.00 0.00
## 56 SEN Tambacounda Gpg F 56 0.00 41.46 0.00
## 57 SEN Tambacounda Gpg M 57 0.00 71.79 0.00
## 58 SEN SebikoURTe Gpg NI 58 0.00 5.13 0.00
## 62 MLI SEN Gpg F 62 0.00 0.00 0.00
## 64 BKF Bama Gpg M 64 0.00 0.00 0.00
## 65 MLI Banco Gpg F 65 0.00 20.59 0.00
## 66 BKF Dedougou Gpg F 66 0.00 52.94 0.00
## 67 MLI Sikasso Gpg F 67 0.00 6.06 0.00
## 71 GUI Kangoliya Gpg M 71 0.00 0.00 0.00
## 77 GUI Mini Gpg F 77 0.00 3.45 0.00
## 78 SEN Hann Gpg NI 78 0.00 0.00 0.00
## 80 BKF Kampty Gpg M 80 0.00 80.77 0.00
## 82 GUI Kifala Gpg M 82 0.00 0.00 0.00
## 83 MLI Sikasso Gpg M 83 0.00 0.00 0.00
## 84 MLI SS Gpg F 84 0.00 4.00 0.00
## 86 BKF Kenedougou Gpg F 86 0.00 0.00 0.00
## 87 MLI SS Gpg M 87 0.00 0.00 0.00
## 88 BKF Dedougou Gpg M 88 0.00 69.57 4.35
## 89 GUI Bafing Gpg F 89 0.00 5.00 0.00
## 91 BKF Kampty Gpg NI 91 0.00 84.21 0.00
## 92 GUI Tinkisso Gpg M 92 0.00 5.56 0.00
## 94 BKF Kenedougou Gpg M 94 0.00 0.00 0.00
## 96 GUI Dekonkore Gpg F 96 0.00 6.25 0.00
## 97 GUI Mini Gpg M 97 0.00 0.00 0.00
## 98 SEN Fleuve Gambie Gpg M 98 0.00 43.75 0.00
## 102 GUI Bafing Gpg M 102 0.00 0.00 0.00
## 103 GUI Tinkisso Gpg F 103 0.00 7.69 0.00
## 104 BKF Bouroum bouroum Gpg F 104 0.00 92.31 0.00
## 106 GUI Karifale Gpg M 106 0.00 8.33 0.00
## 107 GUI Lemonako Gpg F 107 0.00 0.00 0.00
## 108 BKF KouriGUIon Gpg F 108 0.00 50.00 0.00
## 109 MLI Bani Gpg M 109 0.00 0.00 0.00
## 110 MLI Sybi Gpg F 110 0.00 0.00 0.00
## 111 MLI Sybi Gpg M 111 0.00 0.00 0.00
## 113 SEN Fleueve G Gpg F 113 0.00 11.11 0.00
## 114 BKF KouriGUIon Gpg NI 114 0.00 22.22 0.00
## 117 GUI Lemonako Gpg M 117 0.00 0.00 0.00
## 119 SEN Diaguiri Gpg F 119 0.00 0.00 0.00
## 120 MLI Banco Gpg M 120 0.00 28.57 0.00
## 121 MLI Baoule Gpg F 121 0.00 42.86 0.00
## 122 MLI Baoule Gpg M 122 0.00 42.86 0.00
## 123 MLI Bougouni Gpg M 123 0.00 0.00 0.00
## 124 BKF Lorepeni Gpg F 124 0.00 71.43 0.00
## 127 SEN MousSAFlla Gpg M 127 0.00 0.00 0.00
## 128 MLI Baguineda Gpg F 128 0.00 16.67 0.00
## 129 MLI Bougouni Gpg F 129 0.00 0.00 0.00
## 130 MLI Kita Gpg M 130 0.00 16.67 0.00
## 136 GUI Kifala Gpg F 136 0.00 0.00 0.00
## 137 BKF Bouroum bouroum Gpg M 137 0.00 80.00 0.00
## 138 SEN Fleuve Gambie Gpg F 138 0.00 25.00 0.00
## 143 SEN Niokolo Gpg M 143 0.00 0.00 0.00
## 145 BKF Lorepeni Gpg M 145 0.00 100.00 0.00
## 146 BKF KouriGUIon Gpg M 146 0.00 66.67 0.00
## 147 BKF Ouarkoye Gpg M 147 0.00 100.00 0.00
## 150 SEN Diaguiri Gpg M 150 0.00 50.00 0.00
## 151 BKF Ouarkoye Gpg F 151 0.00 100.00 50.00
## 156 GUI Karifale Gpg F 156 0.00 0.00 0.00
## 157 SEN Mako Gpg M 157 0.00 100.00 0.00
## Prev_Tv Prev_Tz Prev_Tsg Prev_TcTv Prev_TcTz Prev_TcTsg Prev_TvTz
## 4 2.01 0.50 3.02 0 0.00 0.00 0.00
## 12 2.83 1.89 0.00 0 0.00 0.00 1.89
## 13 5.66 5.66 0.00 0 1.89 0.00 2.83
## 15 0.00 0.00 0.00 0 0.00 0.00 0.00
## 18 0.00 0.00 1.14 0 0.00 0.00 0.00
## 25 20.51 12.82 0.00 0 0.00 0.00 11.54
## 30 1.41 0.00 0.00 0 0.00 0.00 0.00
## 32 0.00 0.00 0.00 0 0.00 0.00 0.00
## 33 0.00 0.00 0.00 0 0.00 0.00 0.00
## 34 1.54 1.54 4.62 0 0.00 0.00 0.00
## 35 6.25 15.63 0.00 0 0.00 0.00 0.00
## 40 1.72 0.00 0.00 0 0.00 0.00 0.00
## 45 62.26 1.89 11.32 0 0.00 0.00 0.00
## 47 0.00 0.00 0.00 0 0.00 0.00 0.00
## 48 1.92 3.85 0.00 0 0.00 0.00 0.00
## 54 0.00 0.00 0.00 0 0.00 0.00 0.00
## 56 26.83 7.32 0.00 0 0.00 0.00 7.32
## 57 53.85 2.56 0.00 0 0.00 0.00 15.38
## 58 5.13 0.00 0.00 0 0.00 0.00 0.00
## 62 0.00 0.00 0.00 0 0.00 0.00 0.00
## 64 0.00 0.00 0.00 0 0.00 0.00 0.00
## 65 20.59 0.00 0.00 0 0.00 0.00 0.00
## 66 26.47 0.00 23.53 0 0.00 0.00 0.00
## 67 0.00 6.06 0.00 0 0.00 0.00 0.00
## 71 0.00 0.00 0.00 0 0.00 0.00 0.00
## 77 3.45 0.00 0.00 0 0.00 0.00 0.00
## 78 0.00 0.00 0.00 0 0.00 0.00 0.00
## 80 65.38 0.00 7.69 0 0.00 0.00 0.00
## 82 0.00 0.00 0.00 0 0.00 0.00 0.00
## 83 0.00 0.00 0.00 0 0.00 0.00 0.00
## 84 4.00 0.00 0.00 0 0.00 0.00 0.00
## 86 0.00 0.00 0.00 0 0.00 0.00 0.00
## 87 0.00 0.00 0.00 0 0.00 0.00 0.00
## 88 30.43 13.04 4.35 0 0.00 4.35 0.00
## 89 5.00 0.00 0.00 0 0.00 0.00 0.00
## 91 26.32 5.26 21.05 0 0.00 0.00 0.00
## 92 5.56 0.00 0.00 0 0.00 0.00 0.00
## 94 0.00 0.00 0.00 0 0.00 0.00 0.00
## 96 6.25 0.00 0.00 0 0.00 0.00 0.00
## 97 0.00 0.00 0.00 0 0.00 0.00 0.00
## 98 43.75 0.00 0.00 0 0.00 0.00 0.00
## 102 0.00 0.00 0.00 0 0.00 0.00 0.00
## 103 7.69 0.00 0.00 0 0.00 0.00 0.00
## 104 53.85 0.00 23.08 0 0.00 0.00 0.00
## 106 8.33 0.00 0.00 0 0.00 0.00 0.00
## 107 8.33 0.00 0.00 0 0.00 0.00 0.00
## 108 0.00 0.00 33.33 0 0.00 0.00 0.00
## 109 0.00 0.00 0.00 0 0.00 0.00 0.00
## 110 0.00 0.00 0.00 0 0.00 0.00 0.00
## 111 0.00 0.00 0.00 0 0.00 0.00 0.00
## 113 11.11 0.00 0.00 0 0.00 0.00 0.00
## 114 0.00 0.00 11.11 0 0.00 0.00 0.00
## 117 0.00 0.00 0.00 0 0.00 0.00 0.00
## 119 0.00 0.00 0.00 0 0.00 0.00 0.00
## 120 28.57 0.00 0.00 0 0.00 0.00 0.00
## 121 42.86 0.00 0.00 0 0.00 0.00 0.00
## 122 42.86 0.00 0.00 0 0.00 0.00 0.00
## 123 0.00 0.00 0.00 0 0.00 0.00 0.00
## 124 14.29 0.00 28.57 0 0.00 0.00 0.00
## 127 0.00 0.00 0.00 0 0.00 0.00 0.00
## 128 16.67 0.00 0.00 0 0.00 0.00 0.00
## 129 0.00 0.00 0.00 0 0.00 0.00 0.00
## 130 16.67 0.00 0.00 0 0.00 0.00 0.00
## 136 0.00 0.00 0.00 0 0.00 0.00 0.00
## 137 40.00 0.00 20.00 0 0.00 0.00 0.00
## 138 25.00 0.00 0.00 0 0.00 0.00 0.00
## 143 66.67 0.00 0.00 0 0.00 0.00 0.00
## 145 0.00 0.00 0.00 0 0.00 0.00 0.00
## 146 33.33 0.00 0.00 0 0.00 0.00 0.00
## 147 33.33 0.00 0.00 0 0.00 0.00 0.00
## 150 0.00 50.00 0.00 0 0.00 0.00 0.00
## 151 50.00 0.00 0.00 0 0.00 0.00 0.00
## 156 0.00 0.00 0.00 0 0.00 0.00 0.00
## 157 100.00 0.00 0.00 0 0.00 0.00 0.00
## Prev_TvTsg Prev_TzTsg Prev_TcTvTz
## 4 0.00 0.00 0
## 12 0.00 0.00 0
## 13 0.00 0.00 0
## 15 0.00 0.00 0
## 18 0.00 0.00 0
## 25 0.00 0.00 0
## 30 0.00 0.00 0
## 32 0.00 0.00 0
## 33 0.00 0.00 0
## 34 0.00 0.00 0
## 35 0.00 0.00 0
## 40 0.00 0.00 0
## 45 9.43 3.77 0
## 47 0.00 0.00 0
## 48 0.00 0.00 0
## 54 0.00 0.00 0
## 56 0.00 0.00 0
## 57 0.00 0.00 0
## 58 0.00 0.00 0
## 62 0.00 0.00 0
## 64 0.00 0.00 0
## 65 0.00 0.00 0
## 66 2.94 0.00 0
## 67 0.00 0.00 0
## 71 0.00 0.00 0
## 77 0.00 0.00 0
## 78 0.00 0.00 0
## 80 7.69 0.00 0
## 82 0.00 0.00 0
## 83 0.00 0.00 0
## 84 0.00 0.00 0
## 86 0.00 0.00 0
## 87 0.00 0.00 0
## 88 4.35 8.70 0
## 89 0.00 0.00 0
## 91 31.58 0.00 0
## 92 0.00 0.00 0
## 94 0.00 0.00 0
## 96 0.00 0.00 0
## 97 0.00 0.00 0
## 98 0.00 0.00 0
## 102 0.00 0.00 0
## 103 0.00 0.00 0
## 104 15.38 0.00 0
## 106 0.00 0.00 0
## 107 0.00 0.00 0
## 108 16.67 0.00 0
## 109 0.00 0.00 0
## 110 0.00 0.00 0
## 111 0.00 0.00 0
## 113 0.00 0.00 0
## 114 11.11 0.00 0
## 117 0.00 0.00 0
## 119 0.00 0.00 0
## 120 0.00 0.00 0
## 121 0.00 0.00 0
## 122 0.00 0.00 0
## 123 0.00 0.00 0
## 124 28.57 0.00 0
## 127 0.00 0.00 0
## 128 0.00 0.00 0
## 129 0.00 0.00 0
## 130 0.00 0.00 0
## 136 0.00 0.00 0
## 137 20.00 0.00 0
## 138 0.00 0.00 0
## 143 0.00 0.00 0
## 145 66.67 33.33 0
## 146 33.33 0.00 0
## 147 33.33 33.33 0
## 150 0.00 0.00 0
## 151 0.00 0.00 0
## 156 0.00 0.00 0
## 157 0.00 0.00 0

model1<-glm((Prev_Tspp) ~ Country,data=data_gpg, family=gaussian())
summary(model1)

##
## Call:
## glm(formula = (Prev_Tspp) ~ Country, family = gaussian(), data = data_gpg)
##
## Deviance Residuals:
## Min 1Q Median 3Q Max
## -44.453 -17.072 -2.419 15.430 75.726
##
## Coefficients:
## Estimate Std. Error t value Pr(>|t|)
## (Intercept) 44.453 5.521 8.052 1.47e-11 ***
## CountryGUI -42.034 9.127 -4.605 1.79e-05 ***
## CountryMLI -34.025 8.632 -3.942 0.000189 ***
## CountrySEN -20.179 9.127 -2.211 0.030320 *
## ---
## Signif. codes: 0 '***' 0.001 '**' 0.01 '*' 0.05 '.' 0.1 ' ' 1
##
## (Dispersion parameter for gaussian family taken to be 792.4573)
##
## Null deviance: 76638 on 73 degrees of freedom
## Residual deviance: 55472 on 70 degrees of freedom
## AIC: 709.85
##
## Number of Fisher Scoring iterations: 2

Anova(model1)

## Analysis of Deviance Table (Type II tests)
##
## Response: (Prev_Tspp)
## LR Chisq Df Pr(>Chisq)
## Country 26.709 3 6.776e-06 ***
## ---
## Signif. codes: 0 '***' 0.001 '**' 0.01 '*' 0.05 '.' 0.1 ' ' 1

#-----------------------------------------------
data_gt <- subset(data, Species=="Gt")
data_gt

## Country Localisation Species Sex Sample Prev_Sod Prev_Tspp Prev_Tc Prev_Tv
## 2 BKF Comoe Gt F 2 0 16.54 1.10 13.24
## 3 BKF Comoe Gt M 3 0 15.00 3.64 11.36
## 11 BKF Folonzo Gt F 11 0 18.87 1.89 12.26
## 14 BKF Folonzo Gt M 14 0 32.63 2.11 27.37
## 24 GHA Walewale Gt M 24 0 53.85 3.85 12.82
## 43 GHA Walewale Gt F 43 0 66.04 1.89 9.43
## 44 BKF Arly Gt F 44 0 1.89 0.00 0.00
## 55 BKF Arly Gt M 55 0 0.00 0.00 0.00
## 69 GHA MorURTi Gt M 69 0 50.00 0.00 15.63
## 70 BKF Sissili Gt M 70 0 25.00 12.50 12.50
## 95 GHA Bougouhiya Gt F 95 0 18.75 0.00 6.25
## 99 BKF Sissili Gt F 99 0 13.33 6.67 6.67
## 112 GHA MorURTi Gt F 112 0 66.67 0.00 0.00
## 116 GHA Fumbissi Gt F 116 0 100.00 0.00 0.00
## 125 GHA Fumbissi Gt M 125 0 100.00 0.00 66.67
## 126 GHA Grogro Gt M 126 0 100.00 0.00 0.00
## 133 GHA Grogro Gt F 133 0 100.00 0.00 80.00
## 134 GHA Kumpole Gt F 134 0 100.00 0.00 40.00
## 135 GHA Sissili Bidge Gt F 135 0 100.00 0.00 20.00
## 142 GHA Bougouhiya Gt M 142 0 0.00 0.00 0.00
## 148 GHA Kumpole Gt M 148 0 100.00 0.00 50.00
## 149 GHA Psikp_ Gt M 149 0 100.00 0.00 0.00
## 152 GHA Kandiaga Gt M 152 0 100.00 0.00 0.00
## 153 GHA Sissili Bidge Gt M 153 0 100.00 0.00 0.00
## 154 GHA Nabogo Gt F 154 0 0.00 0.00 0.00
## 155 GHA Volta Blanche Gt F 155 0 0.00 0.00 0.00
## Prev_Tz Prev_Tsg Prev_TcTv Prev_TcTz Prev_TcTsg Prev_TvTz Prev_TvTsg
## 2 0.37 0 0.74 1.10 0 0.00 0
## 3 0.00 0 0.00 0.00 0 0.00 0
## 11 1.89 0 1.89 0.94 0 0.00 0
## 14 1.05 0 0.00 1.05 0 1.05 0
## 24 8.97 0 0.00 10.26 0 14.10 0
## 43 24.53 0 0.00 16.98 0 7.55 0
## 44 1.89 0 0.00 0.00 0 0.00 0
## 55 0.00 0 0.00 0.00 0 0.00 0
## 69 15.63 0 0.00 18.75 0 0.00 0
## 70 0.00 0 0.00 0.00 0 0.00 0
## 95 0.00 0 0.00 0.00 0 12.50 0
## 99 0.00 0 0.00 0.00 0 0.00 0
## 112 33.33 0 0.00 22.22 0 11.11 0
## 116 37.50 0 0.00 0.00 0 62.50 0
## 125 33.33 0 0.00 0.00 0 0.00 0
## 126 16.67 0 0.00 0.00 0 83.33 0
## 133 20.00 0 0.00 0.00 0 0.00 0
## 134 60.00 0 0.00 0.00 0 0.00 0
## 135 80.00 0 0.00 0.00 0 0.00 0
## 142 0.00 0 0.00 0.00 0 0.00 0
## 148 50.00 0 0.00 0.00 0 0.00 0
## 149 50.00 0 0.00 0.00 0 50.00 0
## 152 100.00 0 0.00 0.00 0 0.00 0
## 153 100.00 0 0.00 0.00 0 0.00 0
## 154 0.00 0 0.00 0.00 0 0.00 0
## 155 0.00 0 0.00 0.00 0 0.00 0
## Prev_TzTsg Prev_TcTvTz
## 2 0 0.00
## 3 0 0.00
## 11 0 0.00
## 14 0 0.00
## 24 0 1.28
## 43 0 5.66
## 44 0 0.00
## 55 0 0.00
## 69 0 0.00
## 70 0 0.00
## 95 0 0.00
## 99 0 0.00
## 112 0 0.00
## 116 0 0.00
## 125 0 0.00
## 126 0 0.00
## 133 0 0.00
## 134 0 0.00
## 135 0 0.00
## 142 0 0.00
## 148 0 0.00
## 149 0 0.00
## 152 0 0.00
## 153 0 0.00
## 154 0 0.00
## 155 0 0.00

model1<-glm((Prev_Tspp) ~ Country,data=data_gt, family=gaussian())
summary(model1)

##
## Call:
## glm(formula = (Prev_Tspp) ~ Country, family = gaussian(), data = data_gt)
##
## Deviance Residuals:
## Min 1Q Median 3Q Max
## -69.739 -14.935 2.298 30.261 30.261
##
## Coefficients:
## Estimate Std. Error t value Pr(>|t|)
## (Intercept) 15.41 12.04 1.280 0.212940
## CountryGHA 54.33 14.47 3.754 0.000978 ***
## ---
## Signif. codes: 0 '***' 0.001 '**' 0.01 '*' 0.05 '.' 0.1 ' ' 1
##
## (Dispersion parameter for gaussian family taken to be 1159.976)
##
## Null deviance: 44189 on 25 degrees of freedom
## Residual deviance: 27839 on 24 degrees of freedom
## AIC: 261.16
##
## Number of Fisher Scoring iterations: 2

Anova(model1)

## Analysis of Deviance Table (Type II tests)
##
## Response: (Prev_Tspp)
## LR Chisq Df Pr(>Chisq)
## Country 14.095 1 0.0001738 ***
## ---
## Signif. codes: 0 '***' 0.001 '**' 0.01 '*' 0.05 '.' 0.1 ' ' 1

#------------------------------------------------------
# all species

model1<-glm((Prev_Tspp) ~ Country,data=data, family=gaussian())
summary(model1)

##
## Call:
## glm(formula = (Prev_Tspp) ~ Country, family = gaussian(), data = data)
##
## Deviance Residuals:
## Min 1Q Median 3Q Max
## -69.739 -19.625 -2.419 17.636 75.726
##
## Coefficients:
## Estimate Std. Error t value Pr(>|t|)
## (Intercept) 35.627 4.536 7.855 9.24e-13 ***
## CountryETH -15.587 30.088 -0.518 0.605225
## CountryGHA 34.112 8.350 4.085 7.35e-05 ***
## CountryGUI -33.209 8.919 -3.723 0.000284 ***
## CountryKEN 6.128 9.711 0.631 0.529059
## CountryMLI -25.200 8.350 -3.018 0.003021 **
## CountryMOZ -27.627 21.516 -1.284 0.201227
## CountrySAF -14.495 11.453 -1.266 0.207727
## CountrySEN -11.353 8.919 -1.273 0.205148
## CountrySWA -35.627 30.088 -1.184 0.238360
## CountryUGA -26.345 14.054 -1.875 0.062918 .
## CountryURT -5.429 12.962 -0.419 0.675975
## CountryZAI -32.767 30.088 -1.089 0.277985
## CountryZAM 9.583 30.088 0.318 0.750587
## CountryZIM -11.259 10.442 -1.078 0.282769
## ---
## Signif. codes: 0 '***' 0.001 '**' 0.01 '*' 0.05 '.' 0.1 ' ' 1
##
## (Dispersion parameter for gaussian family taken to be 884.7024)
##
## Null deviance: 180975 on 155 degrees of freedom
## Residual deviance: 124743 on 141 degrees of freedom
## AIC: 1517.4
##
## Number of Fisher Scoring iterations: 2

Anova(model1)

## Analysis of Deviance Table (Type II tests)
##
## Response: (Prev_Tspp)
## LR Chisq Df Pr(>Chisq)
## Country 63.56 14 2.76e-08 ***
## ---
## Signif. codes: 0 '***' 0.001 '**' 0.01 '*' 0.05 '.' 0.1 ' ' 1

## Statistics for Table 2

#Glm Tspp per country
data$Country <- relevel(data$Country, ref= "BKF")
model1<-glm((Prev_Tspp) ~ Country,data=data, family=gaussian())
summary(model1)

##
## Call:
## glm(formula = (Prev_Tspp) ~ Country, family = gaussian(), data = data)
##
## Deviance Residuals:
## Min 1Q Median 3Q Max
## -69.739 -19.625 -2.419 17.636 75.726
##
## Coefficients:
## Estimate Std. Error t value Pr(>|t|)
## (Intercept) 35.627 4.536 7.855 9.24e-13 ***
## CountryETH -15.587 30.088 -0.518 0.605225
## CountryGHA 34.112 8.350 4.085 7.35e-05 ***
## CountryGUI -33.209 8.919 -3.723 0.000284 ***
## CountryKEN 6.128 9.711 0.631 0.529059
## CountryMLI -25.200 8.350 -3.018 0.003021 **
## CountryMOZ -27.627 21.516 -1.284 0.201227
## CountrySAF -14.495 11.453 -1.266 0.207727
## CountrySEN -11.353 8.919 -1.273 0.205148
## CountrySWA -35.627 30.088 -1.184 0.238360
## CountryUGA -26.345 14.054 -1.875 0.062918 .
## CountryURT -5.429 12.962 -0.419 0.675975
## CountryZAI -32.767 30.088 -1.089 0.277985
## CountryZAM 9.583 30.088 0.318 0.750587
## CountryZIM -11.259 10.442 -1.078 0.282769
## ---
## Signif. codes: 0 '***' 0.001 '**' 0.01 '*' 0.05 '.' 0.1 ' ' 1
##
## (Dispersion parameter for gaussian family taken to be 884.7024)
##
## Null deviance: 180975 on 155 degrees of freedom
## Residual deviance: 124743 on 141 degrees of freedom
## AIC: 1517.4
##
## Number of Fisher Scoring iterations: 2

data$Country <- relevel(data$Country, ref= "GHA")
model1<-glm((Prev_Tspp) ~ Country,data=data, family=gaussian())
summary(model1)

##
## Call:
## glm(formula = (Prev_Tspp) ~ Country, family = gaussian(), data = data)
##
## Deviance Residuals:
## Min 1Q Median 3Q Max
## -69.739 -19.625 -2.419 17.636 75.726
##
## Coefficients:
## Estimate Std. Error t value Pr(>|t|)
## (Intercept) 69.739 7.011 9.948 < 2e-16 ***
## CountryBKF -34.112 8.350 -4.085 7.35e-05 ***
## CountryETH -49.699 30.559 -1.626 0.106109
## CountryGUI -67.321 10.399 -6.474 1.47e-09 ***
## CountryKEN -27.984 11.085 -2.525 0.012692 *
## CountryMLI -59.312 9.915 -5.982 1.72e-08 ***
## CountryMOZ -61.739 22.170 -2.785 0.006092 **
## CountrySAF -48.607 12.639 -3.846 0.000181 ***
## CountrySEN -45.465 10.399 -4.372 2.37e-05 ***
## CountrySWA -69.739 30.559 -2.282 0.023979 *
## CountryUGA -60.457 15.036 -4.021 9.41e-05 ***
## CountryURT -39.541 14.021 -2.820 0.005494 **
## CountryZAI -66.879 30.559 -2.189 0.030277 *
## CountryZAM -24.529 30.559 -0.803 0.423504
## CountryZIM -45.371 11.731 -3.868 0.000167 ***
## ---
## Signif. codes: 0 '***' 0.001 '**' 0.01 '*' 0.05 '.' 0.1 ' ' 1
##
## (Dispersion parameter for gaussian family taken to be 884.7024)
##
## Null deviance: 180975 on 155 degrees of freedom
## Residual deviance: 124743 on 141 degrees of freedom
## AIC: 1517.4
##
## Number of Fisher Scoring iterations: 2

data$Country <- relevel(data$Country, ref= "GUI")
model1<-glm((Prev_Tspp) ~ Country,data=data, family=gaussian())
summary(model1)

##
## Call:
## glm(formula = (Prev_Tspp) ~ Country, family = gaussian(), data = data)
##
## Deviance Residuals:
## Min 1Q Median 3Q Max
## -69.739 -19.625 -2.419 17.636 75.726
##
## Coefficients:
## Estimate Std. Error t value Pr(>|t|)
## (Intercept) 2.4187 7.6799 0.315 0.753275
## CountryGHA 67.3208 10.3986 6.474 1.47e-09 ***
## CountryBKF 33.2088 8.9193 3.723 0.000284 ***
## CountryETH 17.6213 30.7194 0.574 0.567137
## CountryKEN 39.3363 11.5198 3.415 0.000834 ***
## CountryMLI 8.0086 10.3986 0.770 0.442494
## CountryMOZ 5.5813 22.3904 0.249 0.803512
## CountrySAF 18.7138 13.0218 1.437 0.152901
## CountrySEN 21.8553 10.8610 2.012 0.046095 *
## CountrySWA -2.4187 30.7194 -0.079 0.937356
## CountryUGA 6.8633 15.3597 0.447 0.655676
## CountryURT 27.7797 14.3677 1.933 0.055181 .
## CountryZAI 0.4413 30.7194 0.014 0.988558
## CountryZAM 42.7913 30.7194 1.393 0.165820
## CountryZIM 21.9493 12.1429 1.808 0.072803 .
## ---
## Signif. codes: 0 '***' 0.001 '**' 0.01 '*' 0.05 '.' 0.1 ' ' 1
##
## (Dispersion parameter for gaussian family taken to be 884.7024)
##
## Null deviance: 180975 on 155 degrees of freedom
## Residual deviance: 124743 on 141 degrees of freedom
## AIC: 1517.4
##
## Number of Fisher Scoring iterations: 2

data$Country <- relevel(data$Country, ref= "ETH")
model1<-glm((Prev_Tspp) ~ Country,data=data, family=gaussian())
summary(model1)

##
## Call:
## glm(formula = (Prev_Tspp) ~ Country, family = gaussian(), data = data)
##
## Deviance Residuals:
## Min 1Q Median 3Q Max
## -69.739 -19.625 -2.419 17.636 75.726
##
## Coefficients:
## Estimate Std. Error t value Pr(>|t|)
## (Intercept) 20.040 29.744 0.674 0.502
## CountryGUI -17.621 30.719 -0.574 0.567
## CountryGHA 49.699 30.559 1.626 0.106
## CountryBKF 15.587 30.088 0.518 0.605
## CountryKEN 21.715 30.958 0.701 0.484
## CountryMLI -9.613 30.559 -0.315 0.754
## CountryMOZ -12.040 36.429 -0.331 0.742
## CountrySAF 1.092 31.548 0.035 0.972
## CountrySEN 4.234 30.719 0.138 0.891
## CountrySWA -20.040 42.064 -0.476 0.635
## CountryUGA -10.758 32.583 -0.330 0.742
## CountryURT 10.158 32.127 0.316 0.752
## CountryZAI -17.180 42.064 -0.408 0.684
## CountryZAM 25.170 42.064 0.598 0.551
## CountryZIM 4.328 31.196 0.139 0.890
##
## (Dispersion parameter for gaussian family taken to be 884.7024)
##
## Null deviance: 180975 on 155 degrees of freedom
## Residual deviance: 124743 on 141 degrees of freedom
## AIC: 1517.4
##
## Number of Fisher Scoring iterations: 2

data$Country <- relevel(data$Country, ref= "KEN")
model1<-glm((Prev_Tspp) ~ Country,data=data, family=gaussian())
summary(model1)

##
## Call:
## glm(formula = (Prev_Tspp) ~ Country, family = gaussian(), data = data)
##
## Deviance Residuals:
## Min 1Q Median 3Q Max
## -69.739 -19.625 -2.419 17.636 75.726
##
## Coefficients:
## Estimate Std. Error t value Pr(>|t|)
## (Intercept) 41.755 8.586 4.863 3.05e-06 ***
## CountryETH -21.715 30.958 -0.701 0.484195
## CountryGUI -39.336 11.520 -3.415 0.000834 ***
## CountryGHA 27.984 11.085 2.525 0.012692 *
## CountryBKF -6.128 9.711 -0.631 0.529059
## CountryMLI -31.328 11.085 -2.826 0.005396 **
## CountryMOZ -33.755 22.717 -1.486 0.139546
## CountrySAF -20.622 13.576 -1.519 0.130997
## CountrySEN -17.481 11.520 -1.517 0.131385
## CountrySWA -41.755 30.958 -1.349 0.179582
## CountryUGA -32.473 15.832 -2.051 0.042114 *
## CountryURT -11.557 14.872 -0.777 0.438415
## CountryZAI -38.895 30.958 -1.256 0.211063
## CountryZAM 3.455 30.958 0.112 0.911298
## CountryZIM -17.387 12.736 -1.365 0.174356
## ---
## Signif. codes: 0 '***' 0.001 '**' 0.01 '*' 0.05 '.' 0.1 ' ' 1
##
## (Dispersion parameter for gaussian family taken to be 884.7024)
##
## Null deviance: 180975 on 155 degrees of freedom
## Residual deviance: 124743 on 141 degrees of freedom
## AIC: 1517.4
##
## Number of Fisher Scoring iterations: 2

data$Country <- relevel(data$Country, ref= "MLI")
model1<-glm((Prev_Tspp) ~ Country,data=data, family=gaussian())
summary(model1)

##
## Call:
## glm(formula = (Prev_Tspp) ~ Country, family = gaussian(), data = data)
##
## Deviance Residuals:
## Min 1Q Median 3Q Max
## -69.739 -19.625 -2.419 17.636 75.726
##
## Coefficients:
## Estimate Std. Error t value Pr(>|t|)
## (Intercept) 10.427 7.011 1.487 0.13916
## CountryKEN 31.328 11.085 2.826 0.00540 **
## CountryETH 9.613 30.559 0.315 0.75356
## CountryGUI -8.009 10.399 -0.770 0.44249
## CountryGHA 59.312 9.915 5.982 1.72e-08 ***
## CountryBKF 25.200 8.350 3.018 0.00302 **
## CountryMOZ -2.427 22.170 -0.109 0.91297
## CountrySAF 10.705 12.639 0.847 0.39842
## CountrySEN 13.847 10.399 1.332 0.18514
## CountrySWA -10.427 30.559 -0.341 0.73345
## CountryUGA -1.145 15.036 -0.076 0.93940
## CountryURT 19.771 14.021 1.410 0.16072
## CountryZAI -7.567 30.559 -0.248 0.80478
## CountryZAM 34.783 30.559 1.138 0.25696
## CountryZIM 13.941 11.731 1.188 0.23669
## ---
## Signif. codes: 0 '***' 0.001 '**' 0.01 '*' 0.05 '.' 0.1 ' ' 1
##
## (Dispersion parameter for gaussian family taken to be 884.7024)
##
## Null deviance: 180975 on 155 degrees of freedom
## Residual deviance: 124743 on 141 degrees of freedom
## AIC: 1517.4
##
## Number of Fisher Scoring iterations: 2

data$Country <- relevel(data$Country, ref= "MOZ")
model1<-glm((Prev_Tspp) ~ Country,data=data, family=gaussian())
summary(model1)

##
## Call:
## glm(formula = (Prev_Tspp) ~ Country, family = gaussian(), data = data)
##
## Deviance Residuals:
## Min 1Q Median 3Q Max
## -69.739 -19.625 -2.419 17.636 75.726
##
## Coefficients:
## Estimate Std. Error t value Pr(>|t|)
## (Intercept) 8.000 21.032 0.380 0.70424
## CountryMLI 2.427 22.170 0.109 0.91297
## CountryKEN 33.755 22.717 1.486 0.13955
## CountryETH 12.040 36.429 0.331 0.74151
## CountryGUI -5.581 22.390 -0.249 0.80351
## CountryGHA 61.739 22.170 2.785 0.00609 **
## CountryBKF 27.627 21.516 1.284 0.20123
## CountrySAF 13.132 23.515 0.558 0.57740
## CountrySEN 16.274 22.390 0.727 0.46854
## CountrySWA -8.000 36.429 -0.220 0.82650
## CountryUGA 1.282 24.886 0.052 0.95899
## CountryURT 22.198 24.286 0.914 0.36225
## CountryZAI -5.140 36.429 -0.141 0.88799
## CountryZAM 37.210 36.429 1.021 0.30879
## CountryZIM 16.368 23.040 0.710 0.47861
## ---
## Signif. codes: 0 '***' 0.001 '**' 0.01 '*' 0.05 '.' 0.1 ' ' 1
##
## (Dispersion parameter for gaussian family taken to be 884.7024)
##
## Null deviance: 180975 on 155 degrees of freedom
## Residual deviance: 124743 on 141 degrees of freedom
## AIC: 1517.4
##
## Number of Fisher Scoring iterations: 2

data$Country <- relevel(data$Country, ref= "ZAI")
model1<-glm((Prev_Tspp) ~ Country,data=data, family=gaussian())
summary(model1)

##
## Call:
## glm(formula = (Prev_Tspp) ~ Country, family = gaussian(), data = data)
##
## Deviance Residuals:
## Min 1Q Median 3Q Max
## -69.739 -19.625 -2.419 17.636 75.726
##
## Coefficients:
## Estimate Std. Error t value Pr(>|t|)
## (Intercept) 2.8600 29.7439 0.096 0.9235
## CountryMOZ 5.1400 36.4287 0.141 0.8880
## CountryMLI 7.5672 30.5590 0.248 0.8048
## CountryKEN 38.8950 30.9585 1.256 0.2111
## CountryETH 17.1800 42.0643 0.408 0.6836
## CountryGUI -0.4413 30.7194 -0.014 0.9886
## CountryGHA 66.8794 30.5590 2.189 0.0303 *
## CountryBKF 32.7674 30.0878 1.089 0.2780
## CountrySAF 18.2725 31.5482 0.579 0.5634
## CountrySEN 21.4140 30.7194 0.697 0.4869
## CountrySWA -2.8600 42.0643 -0.068 0.9459
## CountryUGA 6.4220 32.5829 0.197 0.8440
## CountryURT 27.3383 32.1271 0.851 0.3962
## CountryZAM 42.3500 42.0643 1.007 0.3158
## CountryZIM 21.5080 31.1957 0.689 0.4917
## ---
## Signif. codes: 0 '***' 0.001 '**' 0.01 '*' 0.05 '.' 0.1 ' ' 1
##
## (Dispersion parameter for gaussian family taken to be 884.7024)
##
## Null deviance: 180975 on 155 degrees of freedom
## Residual deviance: 124743 on 141 degrees of freedom
## AIC: 1517.4
##
## Number of Fisher Scoring iterations: 2

data$Country <- relevel(data$Country, ref= "SEN")
model1<-glm((Prev_Tspp) ~ Country,data=data, family=gaussian())
summary(model1)

##
## Call:
## glm(formula = (Prev_Tspp) ~ Country, family = gaussian(), data = data)
##
## Deviance Residuals:
## Min 1Q Median 3Q Max
## -69.739 -19.625 -2.419 17.636 75.726
##
## Coefficients:
## Estimate Std. Error t value Pr(>|t|)
## (Intercept) 24.274 7.680 3.161 0.00193 **
## CountryZAI -21.414 30.719 -0.697 0.48690
## CountryMOZ -16.274 22.390 -0.727 0.46854
## CountryMLI -13.847 10.399 -1.332 0.18514
## CountryKEN 17.481 11.520 1.517 0.13139
## CountryETH -4.234 30.719 -0.138 0.89057
## CountryGUI -21.855 10.861 -2.012 0.04609 *
## CountryGHA 45.465 10.399 4.372 2.37e-05 ***
## CountryBKF 11.353 8.919 1.273 0.20515
## CountrySAF -3.142 13.022 -0.241 0.80971
## CountrySWA -24.274 30.719 -0.790 0.43075
## CountryUGA -14.992 15.360 -0.976 0.33071
## CountryURT 5.924 14.368 0.412 0.68072
## CountryZAM 20.936 30.719 0.682 0.49666
## CountryZIM 0.094 12.143 0.008 0.99383
## ---
## Signif. codes: 0 '***' 0.001 '**' 0.01 '*' 0.05 '.' 0.1 ' ' 1
##
## (Dispersion parameter for gaussian family taken to be 884.7024)
##
## Null deviance: 180975 on 155 degrees of freedom
## Residual deviance: 124743 on 141 degrees of freedom
## AIC: 1517.4
##
## Number of Fisher Scoring iterations: 2

data$Country <- relevel(data$Country, ref= "SWA")
model1<-glm((Prev_Tspp) ~ Country,data=data, family=gaussian())
summary(model1)

##
## Call:
## glm(formula = (Prev_Tspp) ~ Country, family = gaussian(), data = data)
##
## Deviance Residuals:
## Min 1Q Median 3Q Max
## -69.739 -19.625 -2.419 17.636 75.726
##
## Coefficients:
## Estimate Std. Error t value Pr(>|t|)
## (Intercept) 4.935e-13 2.974e+01 0.000 1.000
## CountrySEN 2.427e+01 3.072e+01 0.790 0.431
## CountryZAI 2.860e+00 4.206e+01 0.068 0.946
## CountryMOZ 8.000e+00 3.643e+01 0.220 0.826
## CountryMLI 1.043e+01 3.056e+01 0.341 0.733
## CountryKEN 4.175e+01 3.096e+01 1.349 0.180
## CountryETH 2.004e+01 4.206e+01 0.476 0.635
## CountryGUI 2.419e+00 3.072e+01 0.079 0.937
## CountryGHA 6.974e+01 3.056e+01 2.282 0.024 *
## CountryBKF 3.563e+01 3.009e+01 1.184 0.238
## CountrySAF 2.113e+01 3.155e+01 0.670 0.504
## CountryUGA 9.282e+00 3.258e+01 0.285 0.776
## CountryURT 3.020e+01 3.213e+01 0.940 0.349
## CountryZAM 4.521e+01 4.206e+01 1.075 0.284
## CountryZIM 2.437e+01 3.120e+01 0.781 0.436
## ---
## Signif. codes: 0 '***' 0.001 '**' 0.01 '*' 0.05 '.' 0.1 ' ' 1
##
## (Dispersion parameter for gaussian family taken to be 884.7024)
##
## Null deviance: 180975 on 155 degrees of freedom
## Residual deviance: 124743 on 141 degrees of freedom
## AIC: 1517.4
##
## Number of Fisher Scoring iterations: 2

data$Country <- relevel(data$Country, ref= "URT")
model1<-glm((Prev_Tspp) ~ Country,data=data, family=gaussian())
summary(model1)

##
## Call:
## glm(formula = (Prev_Tspp) ~ Country, family = gaussian(), data = data)
##
## Deviance Residuals:
## Min 1Q Median 3Q Max
## -69.739 -19.625 -2.419 17.636 75.726
##
## Coefficients:
## Estimate Std. Error t value Pr(>|t|)
## (Intercept) 30.198 12.143 2.487 0.01405 *
## CountrySWA -30.198 32.127 -0.940 0.34884
## CountrySEN -5.924 14.368 -0.412 0.68072
## CountryZAI -27.338 32.127 -0.851 0.39624
## CountryMOZ -22.198 24.286 -0.914 0.36225
## CountryMLI -19.771 14.021 -1.410 0.16072
## CountryKEN 11.557 14.872 0.777 0.43842
## CountryETH -10.158 32.127 -0.316 0.75232
## CountryGUI -27.780 14.368 -1.933 0.05518 .
## CountryGHA 39.541 14.021 2.820 0.00549 **
## CountryBKF 5.429 12.962 0.419 0.67597
## CountrySAF -9.066 16.064 -0.564 0.57340
## CountryUGA -20.916 18.011 -1.161 0.24747
## CountryZAM 15.012 32.127 0.467 0.64104
## CountryZIM -5.830 15.360 -0.380 0.70482
## ---
## Signif. codes: 0 '***' 0.001 '**' 0.01 '*' 0.05 '.' 0.1 ' ' 1
##
## (Dispersion parameter for gaussian family taken to be 884.7024)
##
## Null deviance: 180975 on 155 degrees of freedom
## Residual deviance: 124743 on 141 degrees of freedom
## AIC: 1517.4
##
## Number of Fisher Scoring iterations: 2

data$Country <- relevel(data$Country, ref= "UGA")
model1<-glm((Prev_Tspp) ~ Country,data=data, family=gaussian())
summary(model1)

##
## Call:
## glm(formula = (Prev_Tspp) ~ Country, family = gaussian(), data = data)
##
## Deviance Residuals:
## Min 1Q Median 3Q Max
## -69.739 -19.625 -2.419 17.636 75.726
##
## Coefficients:
## Estimate Std. Error t value Pr(>|t|)
## (Intercept) 9.282 13.302 0.698 0.4865
## CountryURT 20.916 18.011 1.161 0.2475
## CountrySWA -9.282 32.583 -0.285 0.7762
## CountrySEN 14.992 15.360 0.976 0.3307
## CountryZAI -6.422 32.583 -0.197 0.8440
## CountryMOZ -1.282 24.886 -0.052 0.9590
## CountryMLI 1.145 15.036 0.076 0.9394
## CountryKEN 32.473 15.832 2.051 0.0421 *
## CountryETH 10.758 32.583 0.330 0.7418
## CountryGUI -6.863 15.360 -0.447 0.6557
## CountryGHA 60.457 15.036 4.021 9.41e-05 ***
## CountryBKF 26.345 14.054 1.875 0.0629 .
## CountrySAF 11.850 16.957 0.699 0.4858
## CountryZAM 35.928 32.583 1.103 0.2721
## CountryZIM 15.086 16.291 0.926 0.3560
## ---
## Signif. codes: 0 '***' 0.001 '**' 0.01 '*' 0.05 '.' 0.1 ' ' 1
##
## (Dispersion parameter for gaussian family taken to be 884.7024)
##
## Null deviance: 180975 on 155 degrees of freedom
## Residual deviance: 124743 on 141 degrees of freedom
## AIC: 1517.4
##
## Number of Fisher Scoring iterations: 2

data$Country <- relevel(data$Country, ref= "SAF")
model1<-glm((Prev_Tspp) ~ Country,data=data, family=gaussian())
summary(model1)

##
## Call:
## glm(formula = (Prev_Tspp) ~ Country, family = gaussian(), data = data)
##
## Deviance Residuals:
## Min 1Q Median 3Q Max
## -69.739 -19.625 -2.419 17.636 75.726
##
## Coefficients:
## Estimate Std. Error t value Pr(>|t|)
## (Intercept) 21.133 10.516 2.010 0.046388 *
## CountryUGA -11.850 16.957 -0.699 0.485784
## CountryURT 9.066 16.064 0.564 0.573397
## CountrySWA -21.133 31.548 -0.670 0.504050
## CountrySEN 3.141 13.022 0.241 0.809713
## CountryZAI -18.272 31.548 -0.579 0.563383
## CountryMOZ -13.132 23.515 -0.558 0.577401
## CountryMLI -10.705 12.639 -0.847 0.398419
## CountryKEN 20.623 13.576 1.519 0.130997
## CountryETH -1.092 31.548 -0.035 0.972424
## CountryGUI -18.714 13.022 -1.437 0.152901
## CountryGHA 48.607 12.639 3.846 0.000181 ***
## CountryBKF 14.495 11.453 1.266 0.207727
## CountryZAM 24.077 31.548 0.763 0.446621
## CountryZIM 3.235 14.109 0.229 0.818949
## ---
## Signif. codes: 0 '***' 0.001 '**' 0.01 '*' 0.05 '.' 0.1 ' ' 1
##
## (Dispersion parameter for gaussian family taken to be 884.7024)
##
## Null deviance: 180975 on 155 degrees of freedom
## Residual deviance: 124743 on 141 degrees of freedom
## AIC: 1517.4
##
## Number of Fisher Scoring iterations: 2

data$Country <- relevel(data$Country, ref= "ZAM")
model1<-glm((Prev_Tspp) ~ Country,data=data, family=gaussian())
summary(model1)

##
## Call:
## glm(formula = (Prev_Tspp) ~ Country, family = gaussian(), data = data)
##
## Deviance Residuals:
## Min 1Q Median 3Q Max
## -69.739 -19.625 -2.419 17.636 75.726
##
## Coefficients:
## Estimate Std. Error t value Pr(>|t|)
## (Intercept) 45.210 29.744 1.520 0.131
## CountrySAF -24.078 31.548 -0.763 0.447
## CountryUGA -35.928 32.583 -1.103 0.272
## CountryURT -15.012 32.127 -0.467 0.641
## CountrySWA -45.210 42.064 -1.075 0.284
## CountrySEN -20.936 30.719 -0.682 0.497
## CountryZAI -42.350 42.064 -1.007 0.316
## CountryMOZ -37.210 36.429 -1.021 0.309
## CountryMLI -34.783 30.559 -1.138 0.257
## CountryKEN -3.455 30.958 -0.112 0.911
## CountryETH -25.170 42.064 -0.598 0.551
## CountryGUI -42.791 30.719 -1.393 0.166
## CountryGHA 24.529 30.559 0.803 0.424
## CountryBKF -9.583 30.088 -0.318 0.751
## CountryZIM -20.842 31.196 -0.668 0.505
##
## (Dispersion parameter for gaussian family taken to be 884.7024)
##
## Null deviance: 180975 on 155 degrees of freedom
## Residual deviance: 124743 on 141 degrees of freedom
## AIC: 1517.4
##
## Number of Fisher Scoring iterations: 2

data$Country <- relevel(data$Country, ref= "ZIM")
model1<-glm((Prev_Tspp) ~ Country,data=data, family=gaussian())
summary(model1)

##
## Call:
## glm(formula = (Prev_Tspp) ~ Country, family = gaussian(), data = data)
##
## Deviance Residuals:
## Min 1Q Median 3Q Max
## -69.739 -19.625 -2.419 17.636 75.726
##
## Coefficients:
## Estimate Std. Error t value Pr(>|t|)
## (Intercept) 24.368 9.406 2.591 0.010584 *
## CountryZAM 20.842 31.196 0.668 0.505159
## CountrySAF -3.236 14.109 -0.229 0.818949
## CountryUGA -15.086 16.291 -0.926 0.356024
## CountryURT 5.830 15.360 0.380 0.704824
## CountrySWA -24.368 31.196 -0.781 0.436034
## CountrySEN -0.094 12.143 -0.008 0.993834
## CountryZAI -21.508 31.196 -0.689 0.491671
## CountryMOZ -16.368 23.040 -0.710 0.478611
## CountryMLI -13.941 11.731 -1.188 0.236692
## CountryKEN 17.387 12.736 1.365 0.174356
## CountryETH -4.328 31.196 -0.139 0.889856
## CountryGUI -21.949 12.143 -1.808 0.072803 .
## CountryGHA 45.371 11.731 3.868 0.000167 ***
## CountryBKF 11.259 10.442 1.078 0.282769
## ---
## Signif. codes: 0 '***' 0.001 '**' 0.01 '*' 0.05 '.' 0.1 ' ' 1
##
## (Dispersion parameter for gaussian family taken to be 884.7024)
##
## Null deviance: 180975 on 155 degrees of freedom
## Residual deviance: 124743 on 141 degrees of freedom
## AIC: 1517.4
##
## Number of Fisher Scoring iterations: 2

#--------------------------------------------------------------
# for Sodalis

# model selection
model1<-glm((Prev_Sod) ~ Country,data=data, family=gaussian())
model2<-glm((Prev_Sod) ~ Species,data=data, family=gaussian())
model3<-glm((Prev_Sod) ~ Country*Species,data=data, family=gaussian())
model4<-glm((Prev_Sod) ~ Country+Species,data=data, family=gaussian())
model5<-glm((Prev_Sod) ~ Country*Species+Localisation,data=data, family=gaussian())
model6<-glm((Prev_Sod) ~ Country+Species+Localisation,data=data, family=gaussian())

#AICc(model1, model2, model3, model4)
model.set <- list(model1, model2, model3, model4, model5, model6)
model.names <- c("model1", "model2","model3", "model4", "model5", "model6")

aictab(model.set, modnames = model.names)

##
## Model selection based on AICc:
##
## K AICc Delta_AICc AICcWt Cum.Wt LL
## model3 27 1296.12 0.00 0.97 0.97 -615.15
## model4 23 1302.75 6.64 0.03 1.00 -624.19
## model1 16 1330.18 34.06 0.00 1.00 -647.13
## model2 11 1346.01 49.90 0.00 1.00 -661.09
## model6 100 1563.38 267.27 0.00 1.00 -498.05
## model5 103 1596.16 300.05 0.00 1.00 -489.08

summary(model3)

##
## Call:
## glm(formula = (Prev_Sod) ~ Country * Species, family = gaussian(),
## data = data)
##
## Deviance Residuals:
## Min 1Q Median 3Q Max
## -70.512 -0.338 0.000 0.000 89.357
##
## Coefficients: (124 not defined because of singularities)
## Estimate Std. Error t value Pr(>|t|)
## (Intercept) -59.79500 14.23246 -4.201 4.89e-05 ***
## CountryZAM -2.86000 15.28811 -0.187 0.851895
## CountrySAF 61.07750 15.78949 3.868 0.000173 ***
## CountryUGA 65.60250 9.66905 6.785 3.71e-10 ***
## CountryURT 67.57500 11.84212 5.706 7.43e-08 ***
## CountrySWA 59.79500 19.73687 3.030 0.002955 **
## CountrySEN 59.72231 15.67139 3.811 0.000213 ***
## CountryZAI 71.22500 19.73687 3.609 0.000438 ***
## CountryMOZ 59.79500 19.73687 3.030 0.002955 **
## CountryMLI 59.72231 15.60496 3.827 0.000201 ***
## CountryKEN 15.56111 8.21711 1.894 0.060481 .
## CountryETH 15.57000 15.28811 1.018 0.310361
## CountryGUI 66.10497 15.67139 4.218 4.58e-05 ***
## CountryGHA 59.79500 14.59283 4.098 7.30e-05 ***
## CountryBKF 59.79500 15.03115 3.978 0.000115 ***
## SpeciesGb 14.00000 19.33810 0.724 0.470391
## SpeciesGff 63.84389 16.43423 3.885 0.000162 ***
## SpeciesGmed 4.67000 8.37364 0.558 0.578007
## SpeciesGmm 77.01667 15.28811 5.038 1.54e-06 ***
## SpeciesGmsm 0.33800 7.79544 0.043 0.965482
## SpeciesGp 64.70500 12.48269 5.184 8.11e-07 ***
## SpeciesGpg 0.07269 5.52849 0.013 0.989529
## SpeciesGpp NA NA NA NA
## SpeciesGt NA NA NA NA
## CountryZAM:SpeciesGb NA NA NA NA
## CountrySAF:SpeciesGb -14.25250 21.62065 -0.659 0.510928
## CountryUGA:SpeciesGb NA NA NA NA
## CountryURT:SpeciesGb NA NA NA NA
## CountrySWA:SpeciesGb NA NA NA NA
## CountrySEN:SpeciesGb NA NA NA NA
## CountryZAI:SpeciesGb NA NA NA NA
## CountryMOZ:SpeciesGb NA NA NA NA
## CountryMLI:SpeciesGb NA NA NA NA
## CountryKEN:SpeciesGb NA NA NA NA
## CountryETH:SpeciesGb NA NA NA NA
## CountryGUI:SpeciesGb NA NA NA NA
## CountryGHA:SpeciesGb NA NA NA NA
## CountryBKF:SpeciesGb NA NA NA NA
## CountryZAM:SpeciesGff NA NA NA NA
## CountrySAF:SpeciesGff NA NA NA NA
## CountryUGA:SpeciesGff -65.39139 18.65456 -3.505 0.000626 ***
## CountryURT:SpeciesGff NA NA NA NA
## CountrySWA:SpeciesGff NA NA NA NA
## CountrySEN:SpeciesGff NA NA NA NA
## CountryZAI:SpeciesGff NA NA NA NA
## CountryMOZ:SpeciesGff NA NA NA NA
## CountryMLI:SpeciesGff NA NA NA NA
## CountryKEN:SpeciesGff NA NA NA NA
## CountryETH:SpeciesGff NA NA NA NA
## CountryGUI:SpeciesGff NA NA NA NA
## CountryGHA:SpeciesGff NA NA NA NA
## CountryBKF:SpeciesGff NA NA NA NA
## CountryZAM:SpeciesGmed NA NA NA NA
## CountrySAF:SpeciesGmed NA NA NA NA
## CountryUGA:SpeciesGmed NA NA NA NA
## CountryURT:SpeciesGmed NA NA NA NA
## CountrySWA:SpeciesGmed NA NA NA NA
## CountrySEN:SpeciesGmed NA NA NA NA
## CountryZAI:SpeciesGmed NA NA NA NA
## CountryMOZ:SpeciesGmed NA NA NA NA
## CountryMLI:SpeciesGmed NA NA NA NA
## CountryKEN:SpeciesGmed NA NA NA NA
## CountryETH:SpeciesGmed NA NA NA NA
## CountryGUI:SpeciesGmed NA NA NA NA
## CountryGHA:SpeciesGmed NA NA NA NA
## CountryBKF:SpeciesGmed NA NA NA NA
## CountryZAM:SpeciesGmm NA NA NA NA
## CountrySAF:SpeciesGmm NA NA NA NA
## CountryUGA:SpeciesGmm NA NA NA NA
## CountryURT:SpeciesGmm -8.25667 18.93094 -0.436 0.663454
## CountrySWA:SpeciesGmm NA NA NA NA
## CountrySEN:SpeciesGmm NA NA NA NA
## CountryZAI:SpeciesGmm NA NA NA NA
## CountryMOZ:SpeciesGmm NA NA NA NA
## CountryMLI:SpeciesGmm NA NA NA NA
## CountryKEN:SpeciesGmm 30.74722 16.90164 1.819 0.071184 .
## CountryETH:SpeciesGmm NA NA NA NA
## CountryGUI:SpeciesGmm NA NA NA NA
## CountryGHA:SpeciesGmm NA NA NA NA
## CountryBKF:SpeciesGmm NA NA NA NA
## CountryZAM:SpeciesGmsm NA NA NA NA
## CountrySAF:SpeciesGmsm NA NA NA NA
## CountryUGA:SpeciesGmsm NA NA NA NA
## CountryURT:SpeciesGmsm NA NA NA NA
## CountrySWA:SpeciesGmsm NA NA NA NA
## CountrySEN:SpeciesGmsm NA NA NA NA
## CountryZAI:SpeciesGmsm NA NA NA NA
## CountryMOZ:SpeciesGmsm NA NA NA NA
## CountryMLI:SpeciesGmsm NA NA NA NA
## CountryKEN:SpeciesGmsm NA NA NA NA
## CountryETH:SpeciesGmsm NA NA NA NA
## CountryGUI:SpeciesGmsm NA NA NA NA
## CountryGHA:SpeciesGmsm NA NA NA NA
## CountryBKF:SpeciesGmsm NA NA NA NA
## CountryZAM:SpeciesGp NA NA NA NA
## CountrySAF:SpeciesGp NA NA NA NA
## CountryUGA:SpeciesGp NA NA NA NA
## CountryURT:SpeciesGp NA NA NA NA
## CountrySWA:SpeciesGp NA NA NA NA
## CountrySEN:SpeciesGp NA NA NA NA
## CountryZAI:SpeciesGp NA NA NA NA
## CountryMOZ:SpeciesGp NA NA NA NA
## CountryMLI:SpeciesGp NA NA NA NA
## CountryKEN:SpeciesGp NA NA NA NA
## CountryETH:SpeciesGp NA NA NA NA
## CountryGUI:SpeciesGp NA NA NA NA
## CountryGHA:SpeciesGp NA NA NA NA
## CountryBKF:SpeciesGp NA NA NA NA
## CountryZAM:SpeciesGpg NA NA NA NA
## CountrySAF:SpeciesGpg NA NA NA NA
## CountryUGA:SpeciesGpg NA NA NA NA
## CountryURT:SpeciesGpg NA NA NA NA
## CountrySWA:SpeciesGpg NA NA NA NA
## CountrySEN:SpeciesGpg NA NA NA NA
## CountryZAI:SpeciesGpg NA NA NA NA
## CountryMOZ:SpeciesGpg NA NA NA NA
## CountryMLI:SpeciesGpg NA NA NA NA
## CountryKEN:SpeciesGpg NA NA NA NA
## CountryETH:SpeciesGpg NA NA NA NA
## CountryGUI:SpeciesGpg NA NA NA NA
## CountryGHA:SpeciesGpg NA NA NA NA
## CountryBKF:SpeciesGpg NA NA NA NA
## CountryZAM:SpeciesGpp NA NA NA NA
## CountrySAF:SpeciesGpp NA NA NA NA
## CountryUGA:SpeciesGpp NA NA NA NA
## CountryURT:SpeciesGpp NA NA NA NA
## CountrySWA:SpeciesGpp NA NA NA NA
## CountrySEN:SpeciesGpp NA NA NA NA
## CountryZAI:SpeciesGpp NA NA NA NA
## CountryMOZ:SpeciesGpp NA NA NA NA
## CountryMLI:SpeciesGpp NA NA NA NA
## CountryKEN:SpeciesGpp NA NA NA NA
## CountryETH:SpeciesGpp NA NA NA NA
## CountryGUI:SpeciesGpp NA NA NA NA
## CountryGHA:SpeciesGpp NA NA NA NA
## CountryBKF:SpeciesGpp NA NA NA NA
## CountryZAM:SpeciesGt NA NA NA NA
## CountrySAF:SpeciesGt NA NA NA NA
## CountryUGA:SpeciesGt NA NA NA NA
## CountryURT:SpeciesGt NA NA NA NA
## CountrySWA:SpeciesGt NA NA NA NA
## CountrySEN:SpeciesGt NA NA NA NA
## CountryZAI:SpeciesGt NA NA NA NA
## CountryMOZ:SpeciesGt NA NA NA NA
## CountryMLI:SpeciesGt NA NA NA NA
## CountryKEN:SpeciesGt NA NA NA NA
## CountryETH:SpeciesGt NA NA NA NA
## CountryGUI:SpeciesGt NA NA NA NA
## CountryGHA:SpeciesGt NA NA NA NA
## CountryBKF:SpeciesGt NA NA NA NA
## ---
## Signif. codes: 0 '***' 0.001 '**' 0.01 '*' 0.05 '.' 0.1 ' ' 1
##
## (Dispersion parameter for gaussian family taken to be 186.9811)
##
## Null deviance: 64686 on 155 degrees of freedom
## Residual deviance: 24308 on 130 degrees of freedom
## AIC: 1284.3
##
## Number of Fisher Scoring iterations: 2

Anova(model3)

## Analysis of Deviance Table (Type II tests)
##
## Response: (Prev_Sod)
## LR Chisq Df Pr(>Chisq)
## Country 88.292 12 1.056e-13 ***
## Species 49.906 7 1.507e-08 ***
## Country:Species 15.979 4 0.003048 **
## ---
## Signif. codes: 0 '***' 0.001 '**' 0.01 '*' 0.05 '.' 0.1 ' ' 1

Anova(model1)

## Analysis of Deviance Table (Type II tests)
##
## Response: (Prev_Sod)
## LR Chisq Df Pr(>Chisq)
## Country 108.02 14 < 2.2e-16 ***
## ---
## Signif. codes: 0 '***' 0.001 '**' 0.01 '*' 0.05 '.' 0.1 ' ' 1

Anova(model2)

## Analysis of Deviance Table (Type II tests)
##
## Response: (Prev_Sod)
## LR Chisq Df Pr(>Chisq)
## Species 69.601 9 1.824e-11 ***
## ---
## Signif. codes: 0 '***' 0.001 '**' 0.01 '*' 0.05 '.' 0.1 ' ' 1

data$Country <- relevel(data$Country, ref= "BKF")
model1<-glm((Prev_Sod) ~ Country,data=data, family=gaussian())
summary(model1)

##
## Call:
## glm(formula = (Prev_Sod) ~ Country, family = gaussian(), data = data)
##
## Deviance Residuals:
## Min 1Q Median 3Q Max
## -57.262 -0.518 0.000 0.000 89.357
##
## Coefficients:
## Estimate Std. Error t value Pr(>|t|)
## (Intercept) 0.5177 2.4578 0.211 0.8335
## CountryZIM 11.7793 5.6584 2.082 0.0392 *
## CountryZAM 1.5323 16.3035 0.094 0.9253
## CountrySAF 0.6386 6.2058 0.103 0.9182
## CountryUGA 56.7443 7.6154 7.451 8.47e-12 ***
## CountryURT 40.2907 7.0239 5.736 5.68e-08 ***
## CountrySWA -0.5177 16.3035 -0.032 0.9747
## CountrySEN -0.5177 4.8331 -0.107 0.9149
## CountryZAI 10.9123 16.3035 0.669 0.5044
## CountryMOZ 6.4823 11.6586 0.556 0.5791
## CountryMLI -0.5177 4.5246 -0.114 0.9091
## CountryKEN 23.3982 5.2619 4.447 1.75e-05 ***
## CountryETH 19.9623 16.3035 1.224 0.2228
## CountryGUI 5.8650 4.8331 1.214 0.2270
## CountryGHA -0.5177 4.5246 -0.114 0.9091
## ---
## Signif. codes: 0 '***' 0.001 '**' 0.01 '*' 0.05 '.' 0.1 ' ' 1
##
## (Dispersion parameter for gaussian family taken to be 259.7641)
##
## Null deviance: 64686 on 155 degrees of freedom
## Residual deviance: 36627 on 141 degrees of freedom
## AIC: 1326.3
##
## Number of Fisher Scoring iterations: 2

data$Country <- relevel(data$Country, ref= "GHA")
model1<-glm((Prev_Sod) ~ Country,data=data, family=gaussian())
summary(model1)

##
## Call:
## glm(formula = (Prev_Sod) ~ Country, family = gaussian(), data = data)
##
## Deviance Residuals:
## Min 1Q Median 3Q Max
## -57.262 -0.518 0.000 0.000 89.357
##
## Coefficients:
## Estimate Std. Error t value Pr(>|t|)
## (Intercept) -2.073e-14 3.799e+00 0.000 1.000000
## CountryBKF 5.177e-01 4.525e+00 0.114 0.909074
## CountryZIM 1.230e+01 6.357e+00 1.934 0.055055 .
## CountryZAM 2.050e+00 1.656e+01 0.124 0.901649
## CountrySAF 1.156e+00 6.848e+00 0.169 0.866170
## CountryUGA 5.726e+01 8.148e+00 7.028 8.24e-11 ***
## CountryURT 4.081e+01 7.598e+00 5.371 3.15e-07 ***
## CountrySWA 4.437e-14 1.656e+01 0.000 1.000000
## CountrySEN 6.333e-14 5.635e+00 0.000 1.000000
## CountryZAI 1.143e+01 1.656e+01 0.690 0.491162
## CountryMOZ 7.000e+00 1.201e+01 0.583 0.561026
## CountryMLI 2.074e-14 5.372e+00 0.000 1.000000
## CountryKEN 2.392e+01 6.007e+00 3.982 0.000109 ***
## CountryETH 2.048e+01 1.656e+01 1.237 0.218217
## CountryGUI 6.383e+00 5.635e+00 1.133 0.259238
## ---
## Signif. codes: 0 '***' 0.001 '**' 0.01 '*' 0.05 '.' 0.1 ' ' 1
##
## (Dispersion parameter for gaussian family taken to be 259.7641)
##
## Null deviance: 64686 on 155 degrees of freedom
## Residual deviance: 36627 on 141 degrees of freedom
## AIC: 1326.3
##
## Number of Fisher Scoring iterations: 2

data$Country <- relevel(data$Country, ref= "GUI")
model1<-glm((Prev_Sod) ~ Country,data=data, family=gaussian())
summary(model1)

##
## Call:
## glm(formula = (Prev_Sod) ~ Country, family = gaussian(), data = data)
##
## Deviance Residuals:
## Min 1Q Median 3Q Max
## -57.262 -0.518 0.000 0.000 89.357
##
## Coefficients:
## Estimate Std. Error t value Pr(>|t|)
## (Intercept) 6.3827 4.1614 1.534 0.12733
## CountryGHA -6.3827 5.6346 -1.133 0.25924
## CountryBKF -5.8650 4.8331 -1.214 0.22696
## CountryZIM 5.9143 6.5798 0.899 0.37026
## CountryZAM -4.3327 16.6458 -0.260 0.79502
## CountrySAF -5.2264 7.0561 -0.741 0.46011
## CountryUGA 50.8793 8.3229 6.113 9.05e-09 ***
## CountryURT 34.4257 7.7853 4.422 1.94e-05 ***
## CountrySWA -6.3827 16.6458 -0.383 0.70197
## CountrySEN -6.3827 5.8852 -1.085 0.27998
## CountryZAI 5.0473 16.6458 0.303 0.76217
## CountryMOZ 0.6173 12.1326 0.051 0.95949
## CountryMLI -6.3827 5.6346 -1.133 0.25924
## CountryKEN 17.5332 6.2422 2.809 0.00568 **
## CountryETH 14.0973 16.6458 0.847 0.39848
## ---
## Signif. codes: 0 '***' 0.001 '**' 0.01 '*' 0.05 '.' 0.1 ' ' 1
##
## (Dispersion parameter for gaussian family taken to be 259.7641)
##
## Null deviance: 64686 on 155 degrees of freedom
## Residual deviance: 36627 on 141 degrees of freedom
## AIC: 1326.3
##
## Number of Fisher Scoring iterations: 2

data$Country <- relevel(data$Country, ref= "ETH")
model1<-glm((Prev_Sod) ~ Country,data=data, family=gaussian())
summary(model1)

##
## Call:
## glm(formula = (Prev_Sod) ~ Country, family = gaussian(), data = data)
##
## Deviance Residuals:
## Min 1Q Median 3Q Max
## -57.262 -0.518 0.000 0.000 89.357
##
## Coefficients:
## Estimate Std. Error t value Pr(>|t|)
## (Intercept) 20.480 16.117 1.271 0.206
## CountryGUI -14.097 16.646 -0.847 0.398
## CountryGHA -20.480 16.559 -1.237 0.218
## CountryBKF -19.962 16.304 -1.224 0.223
## CountryZIM -8.183 16.904 -0.484 0.629
## CountryZAM -18.430 22.793 -0.809 0.420
## CountrySAF -19.324 17.095 -1.130 0.260
## CountryUGA 36.782 17.656 2.083 0.039 *
## CountryURT 20.328 17.409 1.168 0.245
## CountrySWA -20.480 22.793 -0.899 0.370
## CountrySEN -20.480 16.646 -1.230 0.221
## CountryZAI -9.050 22.793 -0.397 0.692
## CountryMOZ -13.480 19.739 -0.683 0.496
## CountryMLI -20.480 16.559 -1.237 0.218
## CountryKEN 3.436 16.775 0.205 0.838
## ---
## Signif. codes: 0 '***' 0.001 '**' 0.01 '*' 0.05 '.' 0.1 ' ' 1
##
## (Dispersion parameter for gaussian family taken to be 259.7641)
##
## Null deviance: 64686 on 155 degrees of freedom
## Residual deviance: 36627 on 141 degrees of freedom
## AIC: 1326.3
##
## Number of Fisher Scoring iterations: 2

data$Country <- relevel(data$Country, ref= "KEN")
model1<-glm((Prev_Sod) ~ Country,data=data, family=gaussian())
summary(model1)

##
## Call:
## glm(formula = (Prev_Sod) ~ Country, family = gaussian(), data = data)
##
## Deviance Residuals:
## Min 1Q Median 3Q Max
## -57.262 -0.518 0.000 0.000 89.357
##
## Coefficients:
## Estimate Std. Error t value Pr(>|t|)
## (Intercept) 23.916 4.653 5.140 8.99e-07 ***
## CountryETH -3.436 16.775 -0.205 0.838012
## CountryGUI -17.533 6.242 -2.809 0.005678 **
## CountryGHA -23.916 6.007 -3.982 0.000109 ***
## CountryBKF -23.398 5.262 -4.447 1.75e-05 ***
## CountryZIM -11.619 6.901 -1.684 0.094462 .
## CountryZAM -21.866 16.775 -1.303 0.194544
## CountrySAF -22.760 7.356 -3.094 0.002383 **
## CountryUGA 33.346 8.579 3.887 0.000156 ***
## CountryURT 16.893 8.059 2.096 0.037850 *
## CountrySWA -23.916 16.775 -1.426 0.156178
## CountrySEN -23.916 6.242 -3.831 0.000191 ***
## CountryZAI -12.486 16.775 -0.744 0.457935
## CountryMOZ -16.916 12.310 -1.374 0.171564
## CountryMLI -23.916 6.007 -3.982 0.000109 ***
## ---
## Signif. codes: 0 '***' 0.001 '**' 0.01 '*' 0.05 '.' 0.1 ' ' 1
##
## (Dispersion parameter for gaussian family taken to be 259.7641)
##
## Null deviance: 64686 on 155 degrees of freedom
## Residual deviance: 36627 on 141 degrees of freedom
## AIC: 1326.3
##
## Number of Fisher Scoring iterations: 2

data$Country <- relevel(data$Country, ref= "MLI")
model1<-glm((Prev_Sod) ~ Country,data=data, family=gaussian())
summary(model1)

##
## Call:
## glm(formula = (Prev_Sod) ~ Country, family = gaussian(), data = data)
##
## Deviance Residuals:
## Min 1Q Median 3Q Max
## -57.262 -0.518 0.000 0.000 89.357
##
## Coefficients:
## Estimate Std. Error t value Pr(>|t|)
## (Intercept) -1.593e-14 3.799e+00 0.000 1.000000
## CountryKEN 2.392e+01 6.007e+00 3.982 0.000109 ***
## CountryETH 2.048e+01 1.656e+01 1.237 0.218217
## CountryGUI 6.383e+00 5.635e+00 1.133 0.259238
## CountryGHA 1.606e-14 5.372e+00 0.000 1.000000
## CountryBKF 5.177e-01 4.525e+00 0.114 0.909074
## CountryZIM 1.230e+01 6.357e+00 1.934 0.055055 .
## CountryZAM 2.050e+00 1.656e+01 0.124 0.901649
## CountrySAF 1.156e+00 6.848e+00 0.169 0.866170
## CountryUGA 5.726e+01 8.148e+00 7.028 8.24e-11 ***
## CountryURT 4.081e+01 7.598e+00 5.371 3.15e-07 ***
## CountrySWA -1.030e-14 1.656e+01 0.000 1.000000
## CountrySEN -5.405e-15 5.635e+00 0.000 1.000000
## CountryZAI 1.143e+01 1.656e+01 0.690 0.491162
## CountryMOZ 7.000e+00 1.201e+01 0.583 0.561026
## ---
## Signif. codes: 0 '***' 0.001 '**' 0.01 '*' 0.05 '.' 0.1 ' ' 1
##
## (Dispersion parameter for gaussian family taken to be 259.7641)
##
## Null deviance: 64686 on 155 degrees of freedom
## Residual deviance: 36627 on 141 degrees of freedom
## AIC: 1326.3
##
## Number of Fisher Scoring iterations: 2

data$Country <- relevel(data$Country, ref= "MOZ")
model1<-glm((Prev_Sod) ~ Country,data=data, family=gaussian())
summary(model1)

##
## Call:
## glm(formula = (Prev_Sod) ~ Country, family = gaussian(), data = data)
##
## Deviance Residuals:
## Min 1Q Median 3Q Max
## -57.262 -0.518 0.000 0.000 89.357
##
## Coefficients:
## Estimate Std. Error t value Pr(>|t|)
## (Intercept) 7.0000 11.3966 0.614 0.540060
## CountryMLI -7.0000 12.0130 -0.583 0.561026
## CountryKEN 16.9158 12.3097 1.374 0.171564
## CountryETH 13.4800 19.7395 0.683 0.495793
## CountryGUI -0.6173 12.1326 -0.051 0.959491
## CountryGHA -7.0000 12.0130 -0.583 0.561026
## CountryBKF -6.4823 11.6586 -0.556 0.579084
## CountryZIM 5.2970 12.4843 0.424 0.672000
## CountryZAM -4.9500 19.7395 -0.251 0.802359
## CountrySAF -5.8438 12.7418 -0.459 0.647206
## CountryUGA 50.2620 13.4846 3.727 0.000279 ***
## CountryURT 33.8083 13.1596 2.569 0.011236 *
## CountrySWA -7.0000 19.7395 -0.355 0.723404
## CountrySEN -7.0000 12.1326 -0.577 0.564887
## CountryZAI 4.4300 19.7395 0.224 0.822753
## ---
## Signif. codes: 0 '***' 0.001 '**' 0.01 '*' 0.05 '.' 0.1 ' ' 1
##
## (Dispersion parameter for gaussian family taken to be 259.7641)
##
## Null deviance: 64686 on 155 degrees of freedom
## Residual deviance: 36627 on 141 degrees of freedom
## AIC: 1326.3
##
## Number of Fisher Scoring iterations: 2

data$Country <- relevel(data$Country, ref= "ZAI")
model1<-glm((Prev_Sod) ~ Country,data=data, family=gaussian())
summary(model1)

##
## Call:
## glm(formula = (Prev_Sod) ~ Country, family = gaussian(), data = data)
##
## Deviance Residuals:
## Min 1Q Median 3Q Max
## -57.262 -0.518 0.000 0.000 89.357
##
## Coefficients:
## Estimate Std. Error t value Pr(>|t|)
## (Intercept) 11.430 16.117 0.709 0.4794
## CountryMOZ -4.430 19.739 -0.224 0.8228
## CountryMLI -11.430 16.559 -0.690 0.4912
## CountryKEN 12.486 16.775 0.744 0.4579
## CountryETH 9.050 22.793 0.397 0.6919
## CountryGUI -5.047 16.646 -0.303 0.7622
## CountryGHA -11.430 16.559 -0.690 0.4912
## CountryBKF -10.912 16.303 -0.669 0.5044
## CountryZIM 0.867 16.904 0.051 0.9592
## CountryZAM -9.380 22.793 -0.412 0.6813
## CountrySAF -10.274 17.095 -0.601 0.5488
## CountryUGA 45.832 17.655 2.596 0.0104 *
## CountryURT 29.378 17.409 1.688 0.0937 .
## CountrySWA -11.430 22.793 -0.501 0.6168
## CountrySEN -11.430 16.646 -0.687 0.4934
## ---
## Signif. codes: 0 '***' 0.001 '**' 0.01 '*' 0.05 '.' 0.1 ' ' 1
##
## (Dispersion parameter for gaussian family taken to be 259.7641)
##
## Null deviance: 64686 on 155 degrees of freedom
## Residual deviance: 36627 on 141 degrees of freedom
## AIC: 1326.3
##
## Number of Fisher Scoring iterations: 2

data$Country <- relevel(data$Country, ref= "SEN")
model1<-glm((Prev_Sod) ~ Country,data=data, family=gaussian())
summary(model1)

##
## Call:
## glm(formula = (Prev_Sod) ~ Country, family = gaussian(), data = data)
##
## Deviance Residuals:
## Min 1Q Median 3Q Max
## -57.262 -0.518 0.000 0.000 89.357
##
## Coefficients:
## Estimate Std. Error t value Pr(>|t|)
## (Intercept) -5.003e-14 4.161e+00 0.000 1.000000
## CountryZAI 1.143e+01 1.665e+01 0.687 0.493424
## CountryMOZ 7.000e+00 1.213e+01 0.577 0.564887
## CountryMLI 5.839e-14 5.635e+00 0.000 1.000000
## CountryKEN 2.392e+01 6.242e+00 3.831 0.000191 ***
## CountryETH 2.048e+01 1.665e+01 1.230 0.220618
## CountryGUI 6.383e+00 5.885e+00 1.085 0.279979
## CountryGHA 3.874e-14 5.635e+00 0.000 1.000000
## CountryBKF 5.177e-01 4.833e+00 0.107 0.914853
## CountryZIM 1.230e+01 6.580e+00 1.869 0.063712 .
## CountryZAM 2.050e+00 1.665e+01 0.123 0.902160
## CountrySAF 1.156e+00 7.056e+00 0.164 0.870071
## CountryUGA 5.726e+01 8.323e+00 6.880 1.80e-10 ***
## CountryURT 4.081e+01 7.785e+00 5.242 5.69e-07 ***
## CountrySWA 3.082e-13 1.665e+01 0.000 1.000000
## ---
## Signif. codes: 0 '***' 0.001 '**' 0.01 '*' 0.05 '.' 0.1 ' ' 1
##
## (Dispersion parameter for gaussian family taken to be 259.7641)
##
## Null deviance: 64686 on 155 degrees of freedom
## Residual deviance: 36627 on 141 degrees of freedom
## AIC: 1326.3
##
## Number of Fisher Scoring iterations: 2

data$Country <- relevel(data$Country, ref= "SWA")
model1<-glm((Prev_Sod) ~ Country,data=data, family=gaussian())
summary(model1)

##
## Call:
## glm(formula = (Prev_Sod) ~ Country, family = gaussian(), data = data)
##
## Deviance Residuals:
## Min 1Q Median 3Q Max
## -57.262 -0.518 0.000 0.000 89.357
##
## Coefficients:
## Estimate Std. Error t value Pr(>|t|)
## (Intercept) 2.094e-13 1.612e+01 0.000 1.00000
## CountrySEN -2.094e-13 1.665e+01 0.000 1.00000
## CountryZAI 1.143e+01 2.279e+01 0.501 0.61683
## CountryMOZ 7.000e+00 1.974e+01 0.355 0.72340
## CountryMLI -2.721e-13 1.656e+01 0.000 1.00000
## CountryKEN 2.392e+01 1.678e+01 1.426 0.15618
## CountryETH 2.048e+01 2.279e+01 0.899 0.37044
## CountryGUI 6.383e+00 1.665e+01 0.383 0.70197
## CountryGHA -1.970e-13 1.656e+01 0.000 1.00000
## CountryBKF 5.177e-01 1.630e+01 0.032 0.97471
## CountryZIM 1.230e+01 1.690e+01 0.727 0.46815
## CountryZAM 2.050e+00 2.279e+01 0.090 0.92846
## CountrySAF 1.156e+00 1.709e+01 0.068 0.94617
## CountryUGA 5.726e+01 1.766e+01 3.243 0.00148 **
## CountryURT 4.081e+01 1.741e+01 2.344 0.02047 *
## ---
## Signif. codes: 0 '***' 0.001 '**' 0.01 '*' 0.05 '.' 0.1 ' ' 1
##
## (Dispersion parameter for gaussian family taken to be 259.7641)
##
## Null deviance: 64686 on 155 degrees of freedom
## Residual deviance: 36627 on 141 degrees of freedom
## AIC: 1326.3
##
## Number of Fisher Scoring iterations: 2

data$Country <- relevel(data$Country, ref= "URT")
model1<-glm((Prev_Sod) ~ Country,data=data, family=gaussian())
summary(model1)

##
## Call:
## glm(formula = (Prev_Sod) ~ Country, family = gaussian(), data = data)
##
## Deviance Residuals:
## Min 1Q Median 3Q Max
## -57.262 -0.518 0.000 0.000 89.357
##
## Coefficients:
## Estimate Std. Error t value Pr(>|t|)
## (Intercept) 40.808 6.580 6.202 5.82e-09 ***
## CountrySWA -40.808 17.409 -2.344 0.020467 *
## CountrySEN -40.808 7.785 -5.242 5.69e-07 ***
## CountryZAI -29.378 17.409 -1.688 0.093703 .
## CountryMOZ -33.808 13.160 -2.569 0.011236 *
## CountryMLI -40.808 7.598 -5.371 3.15e-07 ***
## CountryKEN -16.892 8.059 -2.096 0.037850 *
## CountryETH -20.328 17.409 -1.168 0.244890
## CountryGUI -34.426 7.785 -4.422 1.94e-05 ***
## CountryGHA -40.808 7.598 -5.371 3.15e-07 ***
## CountryBKF -40.291 7.024 -5.736 5.68e-08 ***
## CountryZIM -28.511 8.323 -3.426 0.000804 ***
## CountryZAM -38.758 17.409 -2.226 0.027574 *
## CountrySAF -39.652 8.704 -4.555 1.12e-05 ***
## CountryUGA 16.454 9.759 1.686 0.094022 .
## ---
## Signif. codes: 0 '***' 0.001 '**' 0.01 '*' 0.05 '.' 0.1 ' ' 1
##
## (Dispersion parameter for gaussian family taken to be 259.7641)
##
## Null deviance: 64686 on 155 degrees of freedom
## Residual deviance: 36627 on 141 degrees of freedom
## AIC: 1326.3
##
## Number of Fisher Scoring iterations: 2

data$Country <- relevel(data$Country, ref= "UGA")
model1<-glm((Prev_Sod) ~ Country,data=data, family=gaussian())
summary(model1)

##
## Call:
## glm(formula = (Prev_Sod) ~ Country, family = gaussian(), data = data)
##
## Deviance Residuals:
## Min 1Q Median 3Q Max
## -57.262 -0.518 0.000 0.000 89.357
##
## Coefficients:
## Estimate Std. Error t value Pr(>|t|)
## (Intercept) 57.262 7.208 7.944 5.61e-13 ***
## CountryURT -16.454 9.759 -1.686 0.094022 .
## CountrySWA -57.262 17.656 -3.243 0.001475 **
## CountrySEN -57.262 8.323 -6.880 1.80e-10 ***
## CountryZAI -45.832 17.656 -2.596 0.010433 *
## CountryMOZ -50.262 13.485 -3.727 0.000279 ***
## CountryMLI -57.262 8.148 -7.028 8.24e-11 ***
## CountryKEN -33.346 8.579 -3.887 0.000156 ***
## CountryETH -36.782 17.656 -2.083 0.039028 *
## CountryGUI -50.879 8.323 -6.113 9.05e-09 ***
## CountryGHA -57.262 8.148 -7.028 8.24e-11 ***
## CountryBKF -56.744 7.615 -7.451 8.47e-12 ***
## CountryZIM -44.965 8.828 -5.094 1.11e-06 ***
## CountryZAM -55.212 17.656 -3.127 0.002144 **
## CountrySAF -56.106 9.188 -6.106 9.37e-09 ***
## ---
## Signif. codes: 0 '***' 0.001 '**' 0.01 '*' 0.05 '.' 0.1 ' ' 1
##
## (Dispersion parameter for gaussian family taken to be 259.7641)
##
## Null deviance: 64686 on 155 degrees of freedom
## Residual deviance: 36627 on 141 degrees of freedom
## AIC: 1326.3
##
## Number of Fisher Scoring iterations: 2

data$Country <- relevel(data$Country, ref= "SAF")
model1<-glm((Prev_Sod) ~ Country,data=data, family=gaussian())
summary(model1)

##
## Call:
## glm(formula = (Prev_Sod) ~ Country, family = gaussian(), data = data)
##
## Deviance Residuals:
## Min 1Q Median 3Q Max
## -57.262 -0.518 0.000 0.000 89.357
##
## Coefficients:
## Estimate Std. Error t value Pr(>|t|)
## (Intercept) 1.1562 5.6983 0.203 0.83950
## CountryUGA 56.1057 9.1882 6.106 9.37e-09 ***
## CountryURT 39.6521 8.7043 4.555 1.12e-05 ***
## CountrySWA -1.1562 17.0949 -0.068 0.94617
## CountrySEN -1.1563 7.0561 -0.164 0.87007
## CountryZAI 10.2737 17.0949 0.601 0.54882
## CountryMOZ 5.8438 12.7418 0.459 0.64721
## CountryMLI -1.1562 6.8485 -0.169 0.86617
## CountryKEN 22.7596 7.3565 3.094 0.00238 **
## CountryETH 19.3238 17.0949 1.130 0.26023
## CountryGUI 5.2264 7.0561 0.741 0.46011
## CountryGHA -1.1562 6.8485 -0.169 0.86617
## CountryBKF -0.6386 6.2058 -0.103 0.91819
## CountryZIM 11.1408 7.6451 1.457 0.14727
## CountryZAM 0.8938 17.0949 0.052 0.95838
## ---
## Signif. codes: 0 '***' 0.001 '**' 0.01 '*' 0.05 '.' 0.1 ' ' 1
##
## (Dispersion parameter for gaussian family taken to be 259.7641)
##
## Null deviance: 64686 on 155 degrees of freedom
## Residual deviance: 36627 on 141 degrees of freedom
## AIC: 1326.3
##
## Number of Fisher Scoring iterations: 2

data$Country <- relevel(data$Country, ref= "ZAM")
model1<-glm((Prev_Sod) ~ Country,data=data, family=gaussian())
summary(model1)

##
## Call:
## glm(formula = (Prev_Sod) ~ Country, family = gaussian(), data = data)
##
## Deviance Residuals:
## Min 1Q Median 3Q Max
## -57.262 -0.518 0.000 0.000 89.357
##
## Coefficients:
## Estimate Std. Error t value Pr(>|t|)
## (Intercept) 2.0500 16.1172 0.127 0.89897
## CountrySAF -0.8937 17.0949 -0.052 0.95838
## CountryUGA 55.2120 17.6555 3.127 0.00214 **
## CountryURT 38.7583 17.4086 2.226 0.02757 *
## CountrySWA -2.0500 22.7932 -0.090 0.92846
## CountrySEN -2.0500 16.6458 -0.123 0.90216
## CountryZAI 9.3800 22.7932 0.412 0.68131
## CountryMOZ 4.9500 19.7395 0.251 0.80236
## CountryMLI -2.0500 16.5588 -0.124 0.90165
## CountryKEN 21.8658 16.7753 1.303 0.19454
## CountryETH 18.4300 22.7932 0.809 0.42012
## CountryGUI 4.3327 16.6458 0.260 0.79502
## CountryGHA -2.0500 16.5588 -0.124 0.90165
## CountryBKF -1.5323 16.3035 -0.094 0.92525
## CountryZIM 10.2470 16.9039 0.606 0.54536
## ---
## Signif. codes: 0 '***' 0.001 '**' 0.01 '*' 0.05 '.' 0.1 ' ' 1
##
## (Dispersion parameter for gaussian family taken to be 259.7641)
##
## Null deviance: 64686 on 155 degrees of freedom
## Residual deviance: 36627 on 141 degrees of freedom
## AIC: 1326.3
##
## Number of Fisher Scoring iterations: 2

data$Country <- relevel(data$Country, ref= "ZIM")
model1<-glm((Prev_Sod) ~ Country,data=data, family=gaussian())
summary(model1)

##
## Call:
## glm(formula = (Prev_Sod) ~ Country, family = gaussian(), data = data)
##
## Deviance Residuals:
## Min 1Q Median 3Q Max
## -57.262 -0.518 0.000 0.000 89.357
##
## Coefficients:
## Estimate Std. Error t value Pr(>|t|)
## (Intercept) 12.297 5.097 2.413 0.017118 *
## CountryZAM -10.247 16.904 -0.606 0.545361
## CountrySAF -11.141 7.645 -1.457 0.147271
## CountryUGA 44.965 8.828 5.094 1.11e-06 ***
## CountryURT 28.511 8.323 3.426 0.000804 ***
## CountrySWA -12.297 16.904 -0.727 0.468146
## CountrySEN -12.297 6.580 -1.869 0.063712 .
## CountryZAI -0.867 16.904 -0.051 0.959167
## CountryMOZ -5.297 12.484 -0.424 0.672000
## CountryMLI -12.297 6.357 -1.934 0.055055 .
## CountryKEN 11.619 6.901 1.684 0.094462 .
## CountryETH 8.183 16.904 0.484 0.629073
## CountryGUI -5.914 6.580 -0.899 0.370260
## CountryGHA -12.297 6.357 -1.934 0.055055 .
## CountryBKF -11.779 5.658 -2.082 0.039174 *
## ---
## Signif. codes: 0 '***' 0.001 '**' 0.01 '*' 0.05 '.' 0.1 ' ' 1
##
## (Dispersion parameter for gaussian family taken to be 259.7641)
##
## Null deviance: 64686 on 155 degrees of freedom
## Residual deviance: 36627 on 141 degrees of freedom
## AIC: 1326.3
##
## Number of Fisher Scoring iterations: 2

## Statistics for table 3

# for trypanosome Tspp

data$Species <- relevel(data$Species, ref= "Ga")
model1<-glm((Prev_Tspp) ~ Species,data=data, family=gaussian())
summary(model1)

##
## Call:
## glm(formula = (Prev_Tspp) ~ Species, family = gaussian(), data = data)
##
## Deviance Residuals:
## Min 1Q Median 3Q Max
## -53.02 -23.57 -14.97 21.89 76.43
##
## Coefficients:
## Estimate Std. Error t value Pr(>|t|)
## (Intercept) 14.970 10.945 1.368 0.17349
## SpeciesGb 2.096 18.314 0.114 0.90904
## SpeciesGff 2.747 21.890 0.125 0.90032
## SpeciesGmed 28.225 19.731 1.430 0.15472
## SpeciesGmm 9.161 15.955 0.574 0.56672
## SpeciesGmsm 1.064 18.314 0.058 0.95375
## SpeciesGp 21.049 13.082 1.609 0.10977
## SpeciesGpg 8.596 11.591 0.742 0.45955
## SpeciesGpp -12.110 34.611 -0.350 0.72692
## SpeciesGt 38.052 12.699 2.997 0.00321 **
## ---
## Signif. codes: 0 '***' 0.001 '**' 0.01 '*' 0.05 '.' 0.1 ' ' 1
##
## (Dispersion parameter for gaussian family taken to be 1078.113)
##
## Null deviance: 180975 on 155 degrees of freedom
## Residual deviance: 157405 on 146 degrees of freedom
## AIC: 1543.7
##
## Number of Fisher Scoring iterations: 2

data$Species <- relevel(data$Species, ref= "Gb")
model1<-glm((Prev_Tspp) ~ Species,data=data, family=gaussian())
summary(model1)

##
## Call:
## glm(formula = (Prev_Tspp) ~ Species, family = gaussian(), data = data)
##
## Deviance Residuals:
## Min 1Q Median 3Q Max
## -53.02 -23.57 -14.97 21.89 76.43
##
## Coefficients:
## Estimate Std. Error t value Pr(>|t|)
## (Intercept) 17.0660 14.6841 1.162 0.2470
## SpeciesGa -2.0960 18.3143 -0.114 0.9090
## SpeciesGff 0.6507 23.9790 0.027 0.9784
## SpeciesGmed 26.1290 22.0261 1.186 0.2374
## SpeciesGmm 7.0652 18.7186 0.377 0.7064
## SpeciesGmsm -1.0320 20.7664 -0.050 0.9604
## SpeciesGp 18.9526 16.3390 1.160 0.2480
## SpeciesGpg 6.4995 15.1721 0.428 0.6690
## SpeciesGpp -14.2060 35.9685 -0.395 0.6935
## SpeciesGt 35.9559 16.0340 2.242 0.0264 *
## ---
## Signif. codes: 0 '***' 0.001 '**' 0.01 '*' 0.05 '.' 0.1 ' ' 1
##
## (Dispersion parameter for gaussian family taken to be 1078.113)
##
## Null deviance: 180975 on 155 degrees of freedom
## Residual deviance: 157405 on 146 degrees of freedom
## AIC: 1543.7
##
## Number of Fisher Scoring iterations: 2

data$Species <- relevel(data$Species, ref= "Gff")
model1<-glm((Prev_Tspp) ~ Species,data=data, family=gaussian())
summary(model1)

##
## Call:
## glm(formula = (Prev_Tspp) ~ Species, family = gaussian(), data = data)
##
## Deviance Residuals:
## Min 1Q Median 3Q Max
## -53.02 -23.57 -14.97 21.89 76.43
##
## Coefficients:
## Estimate Std. Error t value Pr(>|t|)
## (Intercept) 17.7167 18.9571 0.935 0.3516
## SpeciesGb -0.6507 23.9790 -0.027 0.9784
## SpeciesGa -2.7467 21.8898 -0.125 0.9003
## SpeciesGmed 25.4783 25.0779 1.016 0.3113
## SpeciesGmm 6.4146 22.2292 0.289 0.7733
## SpeciesGmsm -1.6827 23.9790 -0.070 0.9442
## SpeciesGp 18.3019 20.2660 0.903 0.3680
## SpeciesGpg 5.8489 19.3375 0.302 0.7627
## SpeciesGpp -14.8567 37.9142 -0.392 0.6957
## SpeciesGt 35.3053 20.0209 1.763 0.0799 .
## ---
## Signif. codes: 0 '***' 0.001 '**' 0.01 '*' 0.05 '.' 0.1 ' ' 1
##
## (Dispersion parameter for gaussian family taken to be 1078.113)
##
## Null deviance: 180975 on 155 degrees of freedom
## Residual deviance: 157405 on 146 degrees of freedom
## AIC: 1543.7
##
## Number of Fisher Scoring iterations: 2

data$Species <- relevel(data$Species, ref= "Gmed")
model1<-glm((Prev_Tspp) ~ Species,data=data, family=gaussian())
summary(model1)

##
## Call:
## glm(formula = (Prev_Tspp) ~ Species, family = gaussian(), data = data)
##
## Deviance Residuals:
## Min 1Q Median 3Q Max
## -53.02 -23.57 -14.97 21.89 76.43
##
## Coefficients:
## Estimate Std. Error t value Pr(>|t|)
## (Intercept) 43.195 16.417 2.631 0.00943 **
## SpeciesGff -25.478 25.078 -1.016 0.31132
## SpeciesGb -26.129 22.026 -1.186 0.23744
## SpeciesGa -28.225 19.731 -1.430 0.15472
## SpeciesGmm -19.064 20.107 -0.948 0.34464
## SpeciesGmsm -27.161 22.026 -1.233 0.21951
## SpeciesGp -7.176 17.913 -0.401 0.68928
## SpeciesGpg -19.629 16.855 -1.165 0.24608
## SpeciesGpp -40.335 36.710 -1.099 0.27369
## SpeciesGt 9.827 17.635 0.557 0.57822
## ---
## Signif. codes: 0 '***' 0.001 '**' 0.01 '*' 0.05 '.' 0.1 ' ' 1
##
## (Dispersion parameter for gaussian family taken to be 1078.113)
##
## Null deviance: 180975 on 155 degrees of freedom
## Residual deviance: 157405 on 146 degrees of freedom
## AIC: 1543.7
##
## Number of Fisher Scoring iterations: 2

data$Species <- relevel(data$Species, ref= "Gmm")
model1<-glm((Prev_Tspp) ~ Species,data=data, family=gaussian())
summary(model1)

##
## Call:
## glm(formula = (Prev_Tspp) ~ Species, family = gaussian(), data = data)
##
## Deviance Residuals:
## Min 1Q Median 3Q Max
## -53.02 -23.57 -14.97 21.89 76.43
##
## Coefficients:
## Estimate Std. Error t value Pr(>|t|)
## (Intercept) 24.1312 11.6088 2.079 0.0394 *
## SpeciesGmed 19.0637 20.1070 0.948 0.3446
## SpeciesGff -6.4146 22.2292 -0.289 0.7733
## SpeciesGb -7.0652 18.7186 -0.377 0.7064
## SpeciesGa -9.1612 15.9548 -0.574 0.5667
## SpeciesGmsm -8.0972 18.7186 -0.433 0.6660
## SpeciesGp 11.8873 13.6420 0.871 0.3850
## SpeciesGpg -0.5657 12.2202 -0.046 0.9631
## SpeciesGpp -21.2713 34.8264 -0.611 0.5423
## SpeciesGt 28.8907 13.2752 2.176 0.0311 *
## ---
## Signif. codes: 0 '***' 0.001 '**' 0.01 '*' 0.05 '.' 0.1 ' ' 1
##
## (Dispersion parameter for gaussian family taken to be 1078.113)
##
## Null deviance: 180975 on 155 degrees of freedom
## Residual deviance: 157405 on 146 degrees of freedom
## AIC: 1543.7
##
## Number of Fisher Scoring iterations: 2

data$Species <- relevel(data$Species, ref= "Gmsm")
model1<-glm((Prev_Tspp) ~ Species,data=data, family=gaussian())
summary(model1)

##
## Call:
## glm(formula = (Prev_Tspp) ~ Species, family = gaussian(), data = data)
##
## Deviance Residuals:
## Min 1Q Median 3Q Max
## -53.02 -23.57 -14.97 21.89 76.43
##
## Coefficients:
## Estimate Std. Error t value Pr(>|t|)
## (Intercept) 16.034 14.684 1.092 0.2767
## SpeciesGmm 8.097 18.719 0.433 0.6660
## SpeciesGmed 27.161 22.026 1.233 0.2195
## SpeciesGff 1.683 23.979 0.070 0.9442
## SpeciesGb 1.032 20.766 0.050 0.9604
## SpeciesGa -1.064 18.314 -0.058 0.9538
## SpeciesGp 19.985 16.339 1.223 0.2233
## SpeciesGpg 7.532 15.172 0.496 0.6204
## SpeciesGpp -13.174 35.969 -0.366 0.7147
## SpeciesGt 36.988 16.034 2.307 0.0225 *
## ---
## Signif. codes: 0 '***' 0.001 '**' 0.01 '*' 0.05 '.' 0.1 ' ' 1
##
## (Dispersion parameter for gaussian family taken to be 1078.113)
##
## Null deviance: 180975 on 155 degrees of freedom
## Residual deviance: 157405 on 146 degrees of freedom
## AIC: 1543.7
##
## Number of Fisher Scoring iterations: 2

data$Species <- relevel(data$Species, ref= "Gp")
model1<-glm((Prev_Tspp) ~ Species,data=data, family=gaussian())
summary(model1)

##
## Call:
## glm(formula = (Prev_Tspp) ~ Species, family = gaussian(), data = data)
##
## Deviance Residuals:
## Min 1Q Median 3Q Max
## -53.02 -23.57 -14.97 21.89 76.43
##
## Coefficients:
## Estimate Std. Error t value Pr(>|t|)
## (Intercept) 36.019 7.165 5.027 1.44e-06 ***
## SpeciesGmsm -19.985 16.339 -1.223 0.2233
## SpeciesGmm -11.887 13.642 -0.871 0.3850
## SpeciesGmed 7.176 17.913 0.401 0.6893
## SpeciesGff -18.302 20.266 -0.903 0.3680
## SpeciesGb -18.953 16.339 -1.160 0.2480
## SpeciesGa -21.049 13.082 -1.609 0.1098
## SpeciesGpg -12.453 8.118 -1.534 0.1272
## SpeciesGpp -33.159 33.607 -0.987 0.3254
## SpeciesGt 17.003 9.634 1.765 0.0797 .
## ---
## Signif. codes: 0 '***' 0.001 '**' 0.01 '*' 0.05 '.' 0.1 ' ' 1
##
## (Dispersion parameter for gaussian family taken to be 1078.113)
##
## Null deviance: 180975 on 155 degrees of freedom
## Residual deviance: 157405 on 146 degrees of freedom
## AIC: 1543.7
##
## Number of Fisher Scoring iterations: 2

data$Species <- relevel(data$Species, ref= "Gpg")
model1<-glm((Prev_Tspp) ~ Species,data=data, family=gaussian())
summary(model1)

##
## Call:
## glm(formula = (Prev_Tspp) ~ Species, family = gaussian(), data = data)
##
## Deviance Residuals:
## Min 1Q Median 3Q Max
## -53.02 -23.57 -14.97 21.89 76.43
##
## Coefficients:
## Estimate Std. Error t value Pr(>|t|)
## (Intercept) 23.5655 3.8169 6.174 6.26e-09 ***
## SpeciesGp 12.4530 8.1184 1.534 0.127210
## SpeciesGmsm -7.5315 15.1721 -0.496 0.620353
## SpeciesGmm 0.5657 12.2202 0.046 0.963140
## SpeciesGmed 19.6295 16.8552 1.165 0.246083
## SpeciesGff -5.8489 19.3375 -0.302 0.762730
## SpeciesGb -6.4995 15.1721 -0.428 0.669000
## SpeciesGa -8.5955 11.5914 -0.742 0.459553
## SpeciesGpp -20.7055 33.0557 -0.626 0.532042
## SpeciesGt 29.4564 7.4857 3.935 0.000128 ***
## ---
## Signif. codes: 0 '***' 0.001 '**' 0.01 '*' 0.05 '.' 0.1 ' ' 1
##
## (Dispersion parameter for gaussian family taken to be 1078.113)
##
## Null deviance: 180975 on 155 degrees of freedom
## Residual deviance: 157405 on 146 degrees of freedom
## AIC: 1543.7
##
## Number of Fisher Scoring iterations: 2

data$Species <- relevel(data$Species, ref= "Gpp")
model1<-glm((Prev_Tspp) ~ Species,data=data, family=gaussian())
summary(model1)

##
## Call:
## glm(formula = (Prev_Tspp) ~ Species, family = gaussian(), data = data)
##
## Deviance Residuals:
## Min 1Q Median 3Q Max
## -53.02 -23.57 -14.97 21.89 76.43
##
## Coefficients:
## Estimate Std. Error t value Pr(>|t|)
## (Intercept) 2.86 32.84 0.087 0.931
## SpeciesGpg 20.71 33.06 0.626 0.532
## SpeciesGp 33.16 33.61 0.987 0.325
## SpeciesGmsm 13.17 35.97 0.366 0.715
## SpeciesGmm 21.27 34.83 0.611 0.542
## SpeciesGmed 40.34 36.71 1.099 0.274
## SpeciesGff 14.86 37.91 0.392 0.696
## SpeciesGb 14.21 35.97 0.395 0.693
## SpeciesGa 12.11 34.61 0.350 0.727
## SpeciesGt 50.16 33.46 1.499 0.136
##
## (Dispersion parameter for gaussian family taken to be 1078.113)
##
## Null deviance: 180975 on 155 degrees of freedom
## Residual deviance: 157405 on 146 degrees of freedom
## AIC: 1543.7
##
## Number of Fisher Scoring iterations: 2

data$Species <- relevel(data$Species, ref= "Gt")
model1<-glm((Prev_Tspp) ~ Species,data=data, family=gaussian())
summary(model1)

##
## Call:
## glm(formula = (Prev_Tspp) ~ Species, family = gaussian(), data = data)
##
## Deviance Residuals:
## Min 1Q Median 3Q Max
## -53.02 -23.57 -14.97 21.89 76.43
##
## Coefficients:
## Estimate Std. Error t value Pr(>|t|)
## (Intercept) 53.022 6.439 8.234 9.33e-14 ***
## SpeciesGpp -50.162 33.460 -1.499 0.135992
## SpeciesGpg -29.456 7.486 -3.935 0.000128 ***
## SpeciesGp -17.003 9.634 -1.765 0.079651 .
## SpeciesGmsm -36.988 16.034 -2.307 0.022470 *
## SpeciesGmm -28.891 13.275 -2.176 0.031141 *
## SpeciesGmed -9.827 17.635 -0.557 0.578217
## SpeciesGff -35.305 20.021 -1.763 0.079922 .
## SpeciesGb -35.956 16.034 -2.242 0.026437 *
## SpeciesGa -38.052 12.699 -2.997 0.003210 **
## ---
## Signif. codes: 0 '***' 0.001 '**' 0.01 '*' 0.05 '.' 0.1 ' ' 1
##
## (Dispersion parameter for gaussian family taken to be 1078.113)
##
## Null deviance: 180975 on 155 degrees of freedom
## Residual deviance: 157405 on 146 degrees of freedom
## AIC: 1543.7
##
## Number of Fisher Scoring iterations: 2

#--------------------------------------------------------------
# for Sodalis

data$Species <- relevel(data$Species, ref= "Ga")
model1<-glm((Prev_Sod) ~ Species,data=data, family=gaussian())
summary(model1)

##
## Call:
## glm(formula = (Prev_Sod) ~ Species, family = gaussian(), data = data)
##
## Deviance Residuals:
## Min 1Q Median 3Q Max
## -31.116 -1.319 -1.319 0.000 94.421
##
## Coefficients:
## Estimate Std. Error t value Pr(>|t|)
## (Intercept) 3.1633 5.7738 0.548 0.58461
## SpeciesGt -3.1633 6.6990 -0.472 0.63748
## SpeciesGpp 8.2667 18.2583 0.453 0.65139
## SpeciesGpg -1.8440 6.1148 -0.302 0.76341
## SpeciesGp 27.9524 6.9010 4.050 8.27e-05 ***
## SpeciesGmsm -2.8253 9.6614 -0.292 0.77037
## SpeciesGmm 27.2617 8.4167 3.239 0.00149 **
## SpeciesGmed 1.5067 10.4088 0.145 0.88511
## SpeciesGff 11.3300 11.5476 0.981 0.32814
## SpeciesGb 0.4607 9.6614 0.048 0.96204
## ---
## Signif. codes: 0 '***' 0.001 '**' 0.01 '*' 0.05 '.' 0.1 ' ' 1
##
## (Dispersion parameter for gaussian family taken to be 300.0283)
##
## Null deviance: 64686 on 155 degrees of freedom
## Residual deviance: 43804 on 146 degrees of freedom
## AIC: 1344.2
##
## Number of Fisher Scoring iterations: 2

Anova(model1)

## Analysis of Deviance Table (Type II tests)
##
## Response: (Prev_Sod)
## LR Chisq Df Pr(>Chisq)
## Species 69.601 9 1.824e-11 ***
## ---
## Signif. codes: 0 '***' 0.001 '**' 0.01 '*' 0.05 '.' 0.1 ' ' 1

data$Species <- relevel(data$Species, ref= "Gb")
model1<-glm((Prev_Sod) ~ Species,data=data, family=gaussian())
summary(model1)

##
## Call:
## glm(formula = (Prev_Sod) ~ Species, family = gaussian(), data = data)
##
## Deviance Residuals:
## Min 1Q Median 3Q Max
## -31.116 -1.319 -1.319 0.000 94.421
##
## Coefficients:
## Estimate Std. Error t value Pr(>|t|)
## (Intercept) 3.6240 7.7463 0.468 0.64060
## SpeciesGa -0.4607 9.6614 -0.048 0.96204
## SpeciesGt -3.6240 8.4584 -0.428 0.66896
## SpeciesGpp 7.8060 18.9746 0.411 0.68139
## SpeciesGpg -2.3047 8.0038 -0.288 0.77379
## SpeciesGp 27.4917 8.6193 3.190 0.00174 **
## SpeciesGmsm -3.2860 10.9550 -0.300 0.76464
## SpeciesGmm 26.8010 9.8747 2.714 0.00745 **
## SpeciesGmed 1.0460 11.6195 0.090 0.92839
## SpeciesGff 10.8693 12.6497 0.859 0.39161
## ---
## Signif. codes: 0 '***' 0.001 '**' 0.01 '*' 0.05 '.' 0.1 ' ' 1
##
## (Dispersion parameter for gaussian family taken to be 300.0283)
##
## Null deviance: 64686 on 155 degrees of freedom
## Residual deviance: 43804 on 146 degrees of freedom
## AIC: 1344.2
##
## Number of Fisher Scoring iterations: 2

data$Species <- relevel(data$Species, ref= "Gff")
model1<-glm((Prev_Sod) ~ Species,data=data, family=gaussian())
summary(model1)

##
## Call:
## glm(formula = (Prev_Sod) ~ Species, family = gaussian(), data = data)
##
## Deviance Residuals:
## Min 1Q Median 3Q Max
## -31.116 -1.319 -1.319 0.000 94.421
##
## Coefficients:
## Estimate Std. Error t value Pr(>|t|)
## (Intercept) 14.493 10.000 1.449 0.149
## SpeciesGb -10.869 12.650 -0.859 0.392
## SpeciesGa -11.330 11.548 -0.981 0.328
## SpeciesGt -14.493 10.562 -1.372 0.172
## SpeciesGpp -3.063 20.001 -0.153 0.878
## SpeciesGpg -13.174 10.201 -1.291 0.199
## SpeciesGp 16.622 10.691 1.555 0.122
## SpeciesGmsm -14.155 12.650 -1.119 0.265
## SpeciesGmm 15.932 11.727 1.359 0.176
## SpeciesGmed -9.823 13.229 -0.743 0.459
##
## (Dispersion parameter for gaussian family taken to be 300.0283)
##
## Null deviance: 64686 on 155 degrees of freedom
## Residual deviance: 43804 on 146 degrees of freedom
## AIC: 1344.2
##
## Number of Fisher Scoring iterations: 2

data$Species <- relevel(data$Species, ref= "Gmed")
model1<-glm((Prev_Sod) ~ Species,data=data, family=gaussian())
summary(model1)

##
## Call:
## glm(formula = (Prev_Sod) ~ Species, family = gaussian(), data = data)
##
## Deviance Residuals:
## Min 1Q Median 3Q Max
## -31.116 -1.319 -1.319 0.000 94.421
##
## Coefficients:
## Estimate Std. Error t value Pr(>|t|)
## (Intercept) 4.670 8.661 0.539 0.59056
## SpeciesGff 9.823 13.229 0.743 0.45895
## SpeciesGb -1.046 11.619 -0.090 0.92839
## SpeciesGa -1.507 10.409 -0.145 0.88511
## SpeciesGt -4.670 9.303 -0.502 0.61643
## SpeciesGpp 6.760 19.366 0.349 0.72754
## SpeciesGpg -3.351 8.892 -0.377 0.70684
## SpeciesGp 26.446 9.450 2.799 0.00583 **
## SpeciesGmsm -4.332 11.619 -0.373 0.70982
## SpeciesGmm 25.755 10.607 2.428 0.01640 *
## ---
## Signif. codes: 0 '***' 0.001 '**' 0.01 '*' 0.05 '.' 0.1 ' ' 1
##
## (Dispersion parameter for gaussian family taken to be 300.0283)
##
## Null deviance: 64686 on 155 degrees of freedom
## Residual deviance: 43804 on 146 degrees of freedom
## AIC: 1344.2
##
## Number of Fisher Scoring iterations: 2

data$Species <- relevel(data$Species, ref= "Gmm")
model1<-glm((Prev_Sod) ~ Species,data=data, family=gaussian())
summary(model1)

##
## Call:
## glm(formula = (Prev_Sod) ~ Species, family = gaussian(), data = data)
##
## Deviance Residuals:
## Min 1Q Median 3Q Max
## -31.116 -1.319 -1.319 0.000 94.421
##
## Coefficients:
## Estimate Std. Error t value Pr(>|t|)
## (Intercept) 30.4250 6.1240 4.968 1.87e-06 ***
## SpeciesGmed -25.7550 10.6071 -2.428 0.01640 *
## SpeciesGff -15.9317 11.7266 -1.359 0.17637
## SpeciesGb -26.8010 9.8747 -2.714 0.00745 **
## SpeciesGa -27.2617 8.4167 -3.239 0.00149 **
## SpeciesGt -30.4250 7.0031 -4.345 2.60e-05 ***
## SpeciesGpp -18.9950 18.3720 -1.034 0.30289
## SpeciesGpg -29.1057 6.4465 -4.515 1.30e-05 ***
## SpeciesGp 0.6907 7.1966 0.096 0.92367
## SpeciesGmsm -30.0870 9.8747 -3.047 0.00274 **
## ---
## Signif. codes: 0 '***' 0.001 '**' 0.01 '*' 0.05 '.' 0.1 ' ' 1
##
## (Dispersion parameter for gaussian family taken to be 300.0283)
##
## Null deviance: 64686 on 155 degrees of freedom
## Residual deviance: 43804 on 146 degrees of freedom
## AIC: 1344.2
##
## Number of Fisher Scoring iterations: 2

data$Species <- relevel(data$Species, ref= "Gmsm")
model1<-glm((Prev_Sod) ~ Species,data=data, family=gaussian())
summary(model1)

##
## Call:
## glm(formula = (Prev_Sod) ~ Species, family = gaussian(), data = data)
##
## Deviance Residuals:
## Min 1Q Median 3Q Max
## -31.116 -1.319 -1.319 0.000 94.421
##
## Coefficients:
## Estimate Std. Error t value Pr(>|t|)
## (Intercept) 0.3380 7.7463 0.044 0.965256
## SpeciesGmm 30.0870 9.8747 3.047 0.002745 **
## SpeciesGmed 4.3320 11.6195 0.373 0.709822
## SpeciesGff 14.1553 12.6497 1.119 0.264967
## SpeciesGb 3.2860 10.9550 0.300 0.764638
## SpeciesGa 2.8253 9.6614 0.292 0.770368
## SpeciesGt -0.3380 8.4584 -0.040 0.968180
## SpeciesGpp 11.0920 18.9746 0.585 0.559738
## SpeciesGpg 0.9813 8.0038 0.123 0.902586
## SpeciesGp 30.7777 8.6193 3.571 0.000482 ***
## ---
## Signif. codes: 0 '***' 0.001 '**' 0.01 '*' 0.05 '.' 0.1 ' ' 1
##
## (Dispersion parameter for gaussian family taken to be 300.0283)
##
## Null deviance: 64686 on 155 degrees of freedom
## Residual deviance: 43804 on 146 degrees of freedom
## AIC: 1344.2
##
## Number of Fisher Scoring iterations: 2

data$Species <- relevel(data$Species, ref= "Gp")
model1<-glm((Prev_Sod) ~ Species,data=data, family=gaussian())
summary(model1)

##
## Call:
## glm(formula = (Prev_Sod) ~ Species, family = gaussian(), data = data)
##
## Deviance Residuals:
## Min 1Q Median 3Q Max
## -31.116 -1.319 -1.319 0.000 94.421
##
## Coefficients:
## Estimate Std. Error t value Pr(>|t|)
## (Intercept) 31.1157 3.7798 8.232 9.43e-14 ***
## SpeciesGmsm -30.7777 8.6193 -3.571 0.000482 ***
## SpeciesGmm -0.6907 7.1966 -0.096 0.923669
## SpeciesGmed -26.4457 9.4496 -2.799 0.005826 **
## SpeciesGff -16.6224 10.6910 -1.555 0.122157
## SpeciesGb -27.4917 8.6193 -3.190 0.001744 **
## SpeciesGa -27.9524 6.9010 -4.050 8.27e-05 ***
## SpeciesGt -31.1157 5.0820 -6.123 8.08e-09 ***
## SpeciesGpp -19.6857 17.7289 -1.110 0.268664
## SpeciesGpg -29.7964 4.2827 -6.957 1.08e-10 ***
## ---
## Signif. codes: 0 '***' 0.001 '**' 0.01 '*' 0.05 '.' 0.1 ' ' 1
##
## (Dispersion parameter for gaussian family taken to be 300.0283)
##
## Null deviance: 64686 on 155 degrees of freedom
## Residual deviance: 43804 on 146 degrees of freedom
## AIC: 1344.2
##
## Number of Fisher Scoring iterations: 2

data$Species <- relevel(data$Species, ref= "Gpg")
model1<-glm((Prev_Sod) ~ Species,data=data, family=gaussian())
summary(model1)

##
## Call:
## glm(formula = (Prev_Sod) ~ Species, family = gaussian(), data = data)
##
## Deviance Residuals:
## Min 1Q Median 3Q Max
## -31.116 -1.319 -1.319 0.000 94.421
##
## Coefficients:
## Estimate Std. Error t value Pr(>|t|)
## (Intercept) 1.3193 2.0136 0.655 0.513
## SpeciesGp 29.7964 4.2827 6.957 1.08e-10 ***
## SpeciesGmsm -0.9813 8.0038 -0.123 0.903
## SpeciesGmm 29.1057 6.4465 4.515 1.30e-05 ***
## SpeciesGmed 3.3507 8.8917 0.377 0.707
## SpeciesGff 13.1740 10.2012 1.291 0.199
## SpeciesGb 2.3047 8.0038 0.288 0.774
## SpeciesGa 1.8440 6.1148 0.302 0.763
## SpeciesGt -1.3193 3.9489 -0.334 0.739
## SpeciesGpp 10.1107 17.4380 0.580 0.563
## ---
## Signif. codes: 0 '***' 0.001 '**' 0.01 '*' 0.05 '.' 0.1 ' ' 1
##
## (Dispersion parameter for gaussian family taken to be 300.0283)
##
## Null deviance: 64686 on 155 degrees of freedom
## Residual deviance: 43804 on 146 degrees of freedom
## AIC: 1344.2
##
## Number of Fisher Scoring iterations: 2

data$Species <- relevel(data$Species, ref= "Gpp")
model1<-glm((Prev_Sod) ~ Species,data=data, family=gaussian())
summary(model1)

##
## Call:
## glm(formula = (Prev_Sod) ~ Species, family = gaussian(), data = data)
##
## Deviance Residuals:
## Min 1Q Median 3Q Max
## -31.116 -1.319 -1.319 0.000 94.421
##
## Coefficients:
## Estimate Std. Error t value Pr(>|t|)
## (Intercept) 11.430 17.321 0.660 0.510
## SpeciesGpg -10.111 17.438 -0.580 0.563
## SpeciesGp 19.686 17.729 1.110 0.269
## SpeciesGmsm -11.092 18.975 -0.585 0.560
## SpeciesGmm 18.995 18.372 1.034 0.303
## SpeciesGmed -6.760 19.366 -0.349 0.728
## SpeciesGff 3.063 20.001 0.153 0.878
## SpeciesGb -7.806 18.975 -0.411 0.681
## SpeciesGa -8.267 18.258 -0.453 0.651
## SpeciesGt -11.430 17.651 -0.648 0.518
##
## (Dispersion parameter for gaussian family taken to be 300.0283)
##
## Null deviance: 64686 on 155 degrees of freedom
## Residual deviance: 43804 on 146 degrees of freedom
## AIC: 1344.2
##
## Number of Fisher Scoring iterations: 2

data$Species <- relevel(data$Species, ref= "Gt")
model1<-glm((Prev_Sod) ~ Species,data=data, family=gaussian())
summary(model1)

##
## Call:
## glm(formula = (Prev_Sod) ~ Species, family = gaussian(), data = data)
##
## Deviance Residuals:
## Min 1Q Median 3Q Max
## -31.116 -1.319 -1.319 0.000 94.421
##
## Coefficients:
## Estimate Std. Error t value Pr(>|t|)
## (Intercept) 3.508e-14 3.397e+00 0.000 1.000
## SpeciesGpp 1.143e+01 1.765e+01 0.648 0.518
## SpeciesGpg 1.319e+00 3.949e+00 0.334 0.739
## SpeciesGp 3.112e+01 5.082e+00 6.123 8.08e-09 ***
## SpeciesGmsm 3.380e-01 8.458e+00 0.040 0.968
## SpeciesGmm 3.042e+01 7.003e+00 4.345 2.60e-05 ***
## SpeciesGmed 4.670e+00 9.303e+00 0.502 0.616
## SpeciesGff 1.449e+01 1.056e+01 1.372 0.172
## SpeciesGb 3.624e+00 8.458e+00 0.428 0.669
## SpeciesGa 3.163e+00 6.699e+00 0.472 0.637
## ---
## Signif. codes: 0 '***' 0.001 '**' 0.01 '*' 0.05 '.' 0.1 ' ' 1
##
## (Dispersion parameter for gaussian family taken to be 300.0283)
##
## Null deviance: 64686 on 155 degrees of freedom
## Residual deviance: 43804 on 146 degrees of freedom
## AIC: 1344.2
##
## Number of Fisher Scoring iterations: 2

## Statistics for table 4

# species with significant differences between countries

data_ga <- subset(data, Species=="Ga")
data_ga

## Country Localisation Species Sex Sample Prev_Sod Prev_Tspp
## 27 SAF False Bay Park Ga NI 27 0.00 2.60
## 41 SAF SAFint Lucia Ga NI 41 0.00 38.60
## 46 SAF Lower Mkhuze Ga NI 46 0.00 43.40
## 53 MOZ Reserva Especial de Maputo Ga NI 53 0.00 10.00
## 59 SAF North eastern KwaZulu-Natal Ga NI 59 5.13 5.13
## 75 SWA Mlawula Nature Reserve Ga NI 75 0.00 0.00
## 76 URT Uguja island Ga NI 76 6.67 10.00
## 132 URT Zanzibar Ga NI 132 16.67 0.00
## 141 URT Jozani Ga NI 141 0.00 25.00
## Prev_Tc Prev_Tv Prev_Tz Prev_Tsg Prev_TcTv Prev_TcTz Prev_TcTsg Prev_TvTz
## 27 2.60 0.00 0.00 0.00 0.00 0 0.00 0
## 41 10.53 0.00 10.53 15.79 0.00 0 1.75 0
## 46 9.43 1.89 3.77 24.53 1.89 0 1.89 0
## 53 6.00 0.00 0.00 4.00 0.00 0 0.00 0
## 59 2.56 0.00 0.00 2.56 0.00 0 0.00 0
## 75 0.00 0.00 0.00 0.00 0.00 0 0.00 0
## 76 0.00 6.67 3.33 0.00 0.00 0 0.00 0
## 132 0.00 0.00 0.00 0.00 0.00 0 0.00 0
## 141 0.00 0.00 25.00 0.00 0.00 0 0.00 0
## Prev_TvTsg Prev_TzTsg Prev_TcTvTz
## 27 0 0 0
## 41 0 0 0
## 46 0 0 0
## 53 0 0 0
## 59 0 0 0
## 75 0 0 0
## 76 0 0 0
## 132 0 0 0
## 141 0 0 0

model1<-glm((Prev_Tspp) ~ Country,data=data_ga, family=gaussian())
summary(model1)

##
## Call:
## glm(formula = (Prev_Tspp) ~ Country, family = gaussian(), data = data_ga)
##
## Deviance Residuals:
## 27 41 46 53 59 75 76 132
## -19.832 16.168 20.968 0.000 -17.302 0.000 -1.667 -11.667
## 141
## 13.333
##
## Coefficients:
## Estimate Std. Error t value Pr(>|t|)
## (Intercept) 22.433 9.248 2.426 0.0597 .
## CountryURT -10.766 14.126 -0.762 0.4804
## CountrySWA -22.433 20.678 -1.085 0.3275
## CountryMOZ -12.432 20.678 -0.601 0.5739
## ---
## Signif. codes: 0 '***' 0.001 '**' 0.01 '*' 0.05 '.' 0.1 ' ' 1
##
## (Dispersion parameter for gaussian family taken to be 342.0791)
##
## Null deviance: 2214.7 on 8 degrees of freedom
## Residual deviance: 1710.4 on 5 degrees of freedom
## AIC: 82.766
##
## Number of Fisher Scoring iterations: 2

Anova(model1)

## Analysis of Deviance Table (Type II tests)
##
## Response: (Prev_Tspp)
## LR Chisq Df Pr(>Chisq)
## Country 1.4742 3 0.6882

model2<-glm((Prev_Sod) ~ Country,data=data_ga, family=gaussian())
summary(model2)

##
## Call:
## glm(formula = (Prev_Sod) ~ Country, family = gaussian(), data = data_ga)
##
## Deviance Residuals:
## 27 41 46 53 59 75 76 132 141
## -1.282 -1.282 -1.282 0.000 3.848 0.000 -1.110 8.890 -7.780
##
## Coefficients:
## Estimate Std. Error t value Pr(>|t|)
## (Intercept) 1.282 2.833 0.453 0.670
## CountryURT 6.498 4.328 1.501 0.194
## CountrySWA -1.282 6.335 -0.202 0.848
## CountryMOZ -1.282 6.335 -0.202 0.848
##
## (Dispersion parameter for gaussian family taken to be 32.10606)
##
## Null deviance: 258.63 on 8 degrees of freedom
## Residual deviance: 160.53 on 5 degrees of freedom
## AIC: 61.472
##
## Number of Fisher Scoring iterations: 2

Anova(model2)

## Analysis of Deviance Table (Type II tests)
##
## Response: (Prev_Sod)
## LR Chisq Df Pr(>Chisq)
## Country 3.0556 3 0.3831

#-----------------------------------------------

data_gb <- subset(data, Species=="Gb")
data_gb

## Country Localisation Species Sex Sample Prev_Sod Prev_Tspp
## 7 SAF Phinda Gb NI 7 4.12 0.00
## 50 SAF Hluhluwe Gb NI 50 0.00 32.00
## 51 SAF North eastern KwaZulu-Natal Gb NI 51 0.00 4.00
## 52 MOZ Reserva Especial de Maputo Gb NI 52 14.00 6.00
## 74 SAF SAFint Lucia Gb NI 74 0.00 43.33
## Prev_Tc Prev_Tv Prev_Tz Prev_Tsg Prev_TcTv Prev_TcTz Prev_TcTsg Prev_TvTz
## 7 0 0.00 0.00 0.00 0 0 0 0
## 50 12 2.00 14.00 4.00 0 0 0 0
## 51 2 0.00 0.00 2.00 0 0 0 0
## 52 0 2.00 0.00 2.00 0 0 0 0
## 74 0 3.33 3.33 36.67 0 0 0 0
## Prev_TvTsg Prev_TzTsg Prev_TcTvTz
## 7 0 0 0
## 50 0 0 0
## 51 0 0 0
## 52 2 0 0
## 74 0 0 0

model1<-glm((Prev_Tspp) ~ Country,data=data_gb, family=gaussian())
summary(model1)

##
## Call:
## glm(formula = (Prev_Tspp) ~ Country, family = gaussian(), data = data_gb)
##
## Deviance Residuals:
## 7 50 51 52 74
## -19.83 12.17 -15.83 0.00 23.50
##
## Coefficients:
## Estimate Std. Error t value Pr(>|t|)
## (Intercept) 19.83 10.58 1.874 0.158
## CountryMOZ -13.83 23.67 -0.584 0.600
##
## (Dispersion parameter for gaussian family taken to be 448.0589)
##
## Null deviance: 1497.2 on 4 degrees of freedom
## Residual deviance: 1344.2 on 3 degrees of freedom
## AIC: 48.16
##
## Number of Fisher Scoring iterations: 2

Anova(model1)

## Analysis of Deviance Table (Type II tests)
##
## Response: (Prev_Tspp)
## LR Chisq Df Pr(>Chisq)
## Country 0.34163 1 0.5589

model2<-glm((Prev_Sod) ~ Country,data=data_gb, family=gaussian())
summary(model2)

##
## Call:
## glm(formula = (Prev_Sod) ~ Country, family = gaussian(), data = data_gb)
##
## Deviance Residuals:
## 7 50 51 52 74
## 3.09 -1.03 -1.03 0.00 -1.03
##
## Coefficients:
## Estimate Std. Error t value Pr(>|t|)
## (Intercept) 1.030 1.030 1.000 0.3910
## CountryMOZ 12.970 2.303 5.631 0.0111 *
## ---
## Signif. codes: 0 '***' 0.001 '**' 0.01 '*' 0.05 '.' 0.1 ' ' 1
##
## (Dispersion parameter for gaussian family taken to be 4.2436)
##
## Null deviance: 147.308 on 4 degrees of freedom
## Residual deviance: 12.731 on 3 degrees of freedom
## AIC: 24.862
##
## Number of Fisher Scoring iterations: 2

Anova(model2)

## Analysis of Deviance Table (Type II tests)
##
## Response: (Prev_Sod)
## LR Chisq Df Pr(>Chisq)
## Country 31.713 1 1.787e-08 ***
## ---
## Signif. codes: 0 '***' 0.001 '**' 0.01 '*' 0.05 '.' 0.1 ' ' 1

#-------------------------------------------------------------------------
data_gff <- subset(data, Species=="Gff")
data_gff

## Country Localisation Species Sex Sample Prev_Sod Prev_Tspp Prev_Tc Prev_Tv
## 16 UGA Buvuma island Gff NI 16 4.26 10.64 3.19 2.13
## 49 KEN Ikapolok Gff NI 49 39.22 37.25 1.96 9.80
## 61 KEN Obekai Gff NI 61 0.00 5.26 2.63 2.63
## Prev_Tz Prev_Tsg Prev_TcTv Prev_TcTz Prev_TcTsg Prev_TvTz Prev_TvTsg
## 16 1.06 3.19 0.00 0.00 1.06 0 0
## 49 0.00 19.61 3.92 1.96 0.00 0 0
## 61 0.00 0.00 0.00 0.00 0.00 0 0
## Prev_TzTsg Prev_TcTvTz
## 16 0 0
## 49 0 0
## 61 0 0

model1<-glm((Prev_Tspp) ~ Country,data=data_gff, family=gaussian())
summary(model1)

##
## Call:
## glm(formula = (Prev_Tspp) ~ Country, family = gaussian(), data = data_gff)
##
## Deviance Residuals:
## 16 49 61
## 0.00 15.99 -15.99
##
## Coefficients:
## Estimate Std. Error t value Pr(>|t|)
## (Intercept) 10.64 22.62 0.470 0.720
## CountryKEN 10.61 27.70 0.383 0.767
##
## (Dispersion parameter for gaussian family taken to be 511.68)
##
## Null deviance: 586.80 on 2 degrees of freedom
## Residual deviance: 511.68 on 1 degrees of freedom
## AIC: 29.931
##
## Number of Fisher Scoring iterations: 2

Anova(model1)

## Analysis of Deviance Table (Type II tests)
##
## Response: (Prev_Tspp)
## LR Chisq Df Pr(>Chisq)
## Country 0.14681 1 0.7016

model2<-glm((Prev_Sod) ~ Country,data=data_gff, family=gaussian())
summary(model2)

##
## Call:
## glm(formula = (Prev_Sod) ~ Country, family = gaussian(), data = data_gff)
##
## Deviance Residuals:
## 16 49 61
## 0.00 19.61 -19.61
##
## Coefficients:
## Estimate Std. Error t value Pr(>|t|)
## (Intercept) 4.26 27.73 0.154 0.903
## CountryKEN 15.35 33.97 0.452 0.730
##
## (Dispersion parameter for gaussian family taken to be 769.1042)
##
## Null deviance: 926.19 on 2 degrees of freedom
## Residual deviance: 769.10 on 1 degrees of freedom
## AIC: 31.153
##
## Number of Fisher Scoring iterations: 2

Anova(model2)

## Analysis of Deviance Table (Type II tests)
##
## Response: (Prev_Sod)
## LR Chisq Df Pr(>Chisq)
## Country 0.20424 1 0.6513

#-------------------------------------------------------------------------
data_gmm <- subset(data, Species=="Gmm")
data_gmm

## Country Localisation Species Sex Sample Prev_Sod Prev_Tspp Prev_Tc Prev_Tv
## 21 KEN Kari Gmm NI 21 63.53 2.35 2.35 0.00
## 22 URT MaSAFng-URTga Gmm NI 22 76.54 53.09 18.52 1.23
## 26 ZIM Makuti Gmm NI 26 26.92 91.03 11.54 0.00
## 93 ZIM Kemukura Gmm NI 93 22.22 5.56 0.00 5.56
## 100 ZIM Rukomeshi Gmm NI 100 20.00 0.00 0.00 0.00
## 105 ZIM Mukondore Gmm NI 105 23.08 7.69 7.69 0.00
## 115 ZIM M. chiuyi Gmm NI 115 11.11 0.00 0.00 0.00
## 131 ZIM Mushumb Gmm NI 131 0.00 33.33 16.67 0.00
## Prev_Tz Prev_Tsg Prev_TcTv Prev_TcTz Prev_TcTsg Prev_TvTz Prev_TvTsg
## 21 0.00 0.00 0 0 0.00 0 0.00
## 22 1.23 18.52 0 0 6.17 0 6.17
## 26 2.56 69.23 0 0 7.69 0 0.00
## 93 0.00 0.00 0 0 0.00 0 0.00
## 100 0.00 0.00 0 0 0.00 0 0.00
## 105 0.00 0.00 0 0 0.00 0 0.00
## 115 0.00 0.00 0 0 0.00 0 0.00
## 131 0.00 16.67 0 0 0.00 0 0.00
## Prev_TzTsg Prev_TcTvTz
## 21 0.00 0
## 22 1.23 0
## 26 0.00 0
## 93 0.00 0
## 100 0.00 0
## 105 0.00 0
## 115 0.00 0
## 131 0.00 0

model1<-glm((Prev_Tspp) ~ Country,data=data_gmm, family=gaussian())
summary(model1)

##
## Call:
## glm(formula = (Prev_Tspp) ~ Country, family = gaussian(), data = data_gmm)
##
## Deviance Residuals:
## 21 22 26 93 100 105 115 131
## 0.00 0.00 68.09 -17.38 -22.93 -15.24 -22.93 10.39
##
## Coefficients:
## Estimate Std. Error t value Pr(>|t|)
## (Intercept) 22.93 14.53 1.579 0.175
## CountryURT 30.15 38.44 0.785 0.468
## CountryKEN -20.59 38.44 -0.536 0.615
##
## (Dispersion parameter for gaussian family taken to be 1266.263)
##
## Null deviance: 7652.9 on 7 degrees of freedom
## Residual deviance: 6331.3 on 5 degrees of freedom
## AIC: 84.094
##
## Number of Fisher Scoring iterations: 2

Anova(model1)

## Analysis of Deviance Table (Type II tests)
##
## Response: (Prev_Tspp)
## LR Chisq Df Pr(>Chisq)
## Country 1.0437 2 0.5934

model2<-glm((Prev_Sod) ~ Country,data=data_gmm, family=gaussian())
summary(model2)

##
## Call:
## glm(formula = (Prev_Sod) ~ Country, family = gaussian(), data = data_gmm)
##
## Deviance Residuals:
## 21 22 26 93 100 105 115 131
## 0.000 0.000 9.698 4.998 2.778 5.858 -6.112 -17.222
##
## Coefficients:
## Estimate Std. Error t value Pr(>|t|)
## (Intercept) 17.222 4.062 4.240 0.00817 **
## CountryURT 59.318 10.747 5.519 0.00267 **
## CountryKEN 46.308 10.747 4.309 0.00765 **
## ---
## Signif. codes: 0 '***' 0.001 '**' 0.01 '*' 0.05 '.' 0.1 ' ' 1
##
## (Dispersion parameter for gaussian family taken to be 99.0037)
##
## Null deviance: 4763.52 on 7 degrees of freedom
## Residual deviance: 495.02 on 5 degrees of freedom
## AIC: 63.704
##
## Number of Fisher Scoring iterations: 2

Anova(model2)

## Analysis of Deviance Table (Type II tests)
##
## Response: (Prev_Sod)
## LR Chisq Df Pr(>Chisq)
## Country 43.115 2 4.343e-10 ***
## ---
## Signif. codes: 0 '***' 0.001 '**' 0.01 '*' 0.05 '.' 0.1 ' ' 1

data_gmm$Country <- relevel(data_gmm$Country, ref= "URT")
model2<-glm((Prev_Sod) ~ Country,data=data_gmm, family=gaussian())
summary(model2)

##
## Call:
## glm(formula = (Prev_Sod) ~ Country, family = gaussian(), data = data_gmm)
##
## Deviance Residuals:
## 21 22 26 93 100 105 115 131
## 0.000 0.000 9.698 4.998 2.778 5.858 -6.112 -17.222
##
## Coefficients:
## Estimate Std. Error t value Pr(>|t|)
## (Intercept) 76.54 9.95 7.692 0.000592 ***
## CountryZIM -59.32 10.75 -5.519 0.002673 **
## CountryKEN -13.01 14.07 -0.925 0.397621
## ---
## Signif. codes: 0 '***' 0.001 '**' 0.01 '*' 0.05 '.' 0.1 ' ' 1
##
## (Dispersion parameter for gaussian family taken to be 99.0037)
##
## Null deviance: 4763.52 on 7 degrees of freedom
## Residual deviance: 495.02 on 5 degrees of freedom
## AIC: 63.704
##
## Number of Fisher Scoring iterations: 2

Anova(model2)

## Analysis of Deviance Table (Type II tests)
##
## Response: (Prev_Sod)
## LR Chisq Df Pr(>Chisq)
## Country 43.115 2 4.343e-10 ***
## ---
## Signif. codes: 0 '***' 0.001 '**' 0.01 '*' 0.05 '.' 0.1 ' ' 1

data_gmm$Country <- relevel(data_gmm$Country, ref= "ZAM")
model2<-glm((Prev_Sod) ~ Country,data=data_gmm, family=gaussian())
summary(model2)

##
## Call:
## glm(formula = (Prev_Sod) ~ Country, family = gaussian(), data = data_gmm)
##
## Deviance Residuals:
## 21 22 26 93 100 105 115 131
## 0.000 0.000 9.698 4.998 2.778 5.858 -6.112 -17.222
##
## Coefficients:
## Estimate Std. Error t value Pr(>|t|)
## (Intercept) 76.54 9.95 7.692 0.000592 ***
## CountryZIM -59.32 10.75 -5.519 0.002673 **
## CountryKEN -13.01 14.07 -0.925 0.397621
## ---
## Signif. codes: 0 '***' 0.001 '**' 0.01 '*' 0.05 '.' 0.1 ' ' 1
##
## (Dispersion parameter for gaussian family taken to be 99.0037)
##
## Null deviance: 4763.52 on 7 degrees of freedom
## Residual deviance: 495.02 on 5 degrees of freedom
## AIC: 63.704
##
## Number of Fisher Scoring iterations: 2

Anova(model2)

## Analysis of Deviance Table (Type II tests)
##
## Response: (Prev_Sod)
## LR Chisq Df Pr(>Chisq)
## Country 43.115 2 4.343e-10 ***
## ---
## Signif. codes: 0 '***' 0.001 '**' 0.01 '*' 0.05 '.' 0.1 ' ' 1

data_gmm$Country <- relevel(data_gmm$Country, ref= "ZIM")
model2<-glm((Prev_Sod) ~ Country,data=data_gmm, family=gaussian())
summary(model2)

##
## Call:
## glm(formula = (Prev_Sod) ~ Country, family = gaussian(), data = data_gmm)
##
## Deviance Residuals:
## 21 22 26 93 100 105 115 131
## 0.000 0.000 9.698 4.998 2.778 5.858 -6.112 -17.222
##
## Coefficients:
## Estimate Std. Error t value Pr(>|t|)
## (Intercept) 17.222 4.062 4.240 0.00817 **
## CountryURT 59.318 10.747 5.519 0.00267 **
## CountryKEN 46.308 10.747 4.309 0.00765 **
## ---
## Signif. codes: 0 '***' 0.001 '**' 0.01 '*' 0.05 '.' 0.1 ' ' 1
##
## (Dispersion parameter for gaussian family taken to be 99.0037)
##
## Null deviance: 4763.52 on 7 degrees of freedom
## Residual deviance: 495.02 on 5 degrees of freedom
## AIC: 63.704
##
## Number of Fisher Scoring iterations: 2

Anova(model2)

## Analysis of Deviance Table (Type II tests)
##
## Response: (Prev_Sod)
## LR Chisq Df Pr(>Chisq)
## Country 43.115 2 4.343e-10 ***
## ---
## Signif. codes: 0 '***' 0.001 '**' 0.01 '*' 0.05 '.' 0.1 ' ' 1

#----------------------------------------------------------------
#Gp

data_gp <- subset(data, Species=="Gp")
data_gp

## Country Localisation Species Sex Sample Prev_Sod Prev_Tspp Prev_Tc
## 1 ETH Arba minch, nech SAFr Gp NI 1 20.48 20.04 6.10
## 5 KEN Katotoi Gp NI 5 42.56 88.72 21.54
## 6 KEN Mwea Gp NI 6 3.08 19.49 7.18
## 8 ZAM Mfuwe Gp NI 8 2.05 45.21 1.37
## 9 URT URTzania Gp NI 9 78.77 19.86 6.16
## 17 KEN Kari Gp NI 17 89.36 2.13 1.06
## 19 KEN Koibos Gp NI 19 0.00 71.59 15.91
## 20 KEN Meru nat. parc Gp NI 20 22.99 70.11 29.89
## 23 KEN Ruma nat. parc Gp NI 23 26.25 17.50 10.00
## 31 URT MaSAFng-URTga Gp NI 31 66.20 73.24 33.80
## 38 KEN Emsos Gp NI 38 0.00 93.33 15.00
## 42 UGA Budaka Gp NI 42 94.55 7.27 1.82
## 60 ZIM Makuti Gp NI 60 15.79 86.84 7.89
## 79 UGA Omugo Gp NI 79 100.00 0.00 0.00
## 81 ZIM Mushumb Gp NI 81 3.85 19.23 3.85
## 85 UGA Lira Gp NI 85 0.00 16.00 8.00
## 90 KEN Kiria Gp NI 90 0.00 80.00 55.00
## 101 KEN Mwea nat. parc Gp NI 101 0.00 13.33 13.33
## 118 UGA Moyo Gp NI 118 87.50 12.50 0.00
## 139 ZIM Rukomeshi Gp NI 139 0.00 0.00 0.00
## 140 ZIM Gokwe Gp NI 140 0.00 0.00 0.00
## Prev_Tv Prev_Tz Prev_Tsg Prev_TcTv Prev_TcTz Prev_TcTsg Prev_TvTz
## 1 0.65 1.09 10.46 0.00 0.00 0.65 0.00
## 5 15.38 0.51 26.15 6.67 1.54 15.90 1.03
## 6 0.51 1.03 7.69 1.03 0.51 0.51 0.00
## 8 0.68 0.68 34.93 0.00 0.00 7.53 0.00
## 9 2.74 0.68 8.22 0.00 0.00 0.68 0.00
## 17 0.00 1.06 0.00 0.00 0.00 0.00 0.00
## 19 9.09 0.00 28.41 0.00 0.00 15.91 0.00
## 20 4.60 0.00 25.29 0.00 0.00 10.34 0.00
## 23 2.50 2.50 0.00 1.25 0.00 0.00 0.00
## 31 0.00 0.00 14.08 0.00 1.41 21.13 1.41
## 38 8.33 0.00 58.33 1.67 0.00 10.00 0.00
## 42 0.00 0.00 5.45 0.00 0.00 0.00 0.00
## 60 0.00 0.00 73.68 0.00 0.00 5.26 0.00
## 79 0.00 0.00 0.00 0.00 0.00 0.00 0.00
## 81 0.00 7.69 3.85 0.00 0.00 3.85 0.00
## 85 0.00 4.00 4.00 0.00 0.00 0.00 0.00
## 90 5.00 0.00 10.00 10.00 0.00 0.00 0.00
## 101 0.00 0.00 0.00 0.00 0.00 0.00 0.00
## 118 0.00 0.00 12.50 0.00 0.00 0.00 0.00
## 139 0.00 0.00 0.00 0.00 0.00 0.00 0.00
## 140 0.00 0.00 0.00 0.00 0.00 0.00 0.00
## Prev_TvTsg Prev_TzTsg Prev_TcTvTz
## 1 0.44 0.65 0
## 5 0.00 0.00 0
## 6 0.00 1.03 0
## 8 0.00 0.00 0
## 9 0.68 0.68 0
## 17 0.00 0.00 0
## 19 0.00 2.27 0
## 20 0.00 0.00 0
## 23 1.25 0.00 0
## 31 0.00 1.41 0
## 38 0.00 0.00 0
## 42 0.00 0.00 0
## 60 0.00 0.00 0
## 79 0.00 0.00 0
## 81 0.00 0.00 0
## 85 0.00 0.00 0
## 90 0.00 0.00 0
## 101 0.00 0.00 0
## 118 0.00 0.00 0
## 139 0.00 0.00 0
## 140 0.00 0.00 0

model1<-glm((Prev_Tspp) ~ Country,data=data_gp, family=gaussian())
summary(model1)

##
## Call:
## glm(formula = (Prev_Tspp) ~ Country, family = gaussian(), data = data_gp)
##
## Deviance Residuals:
## Min 1Q Median 3Q Max
## -48.56 -26.52 0.00 20.90 60.32
##
## Coefficients:
## Estimate Std. Error t value Pr(>|t|)
## (Intercept) 26.518 17.046 1.556 0.141
## CountryZAM 18.692 38.117 0.490 0.631
## CountryUGA -17.575 24.107 -0.729 0.477
## CountryURT 20.032 29.525 0.678 0.508
## CountryKEN 24.171 20.487 1.180 0.256
## CountryETH -6.478 38.117 -0.170 0.867
##
## (Dispersion parameter for gaussian family taken to be 1162.303)
##
## Null deviance: 23227 on 20 degrees of freedom
## Residual deviance: 17435 on 15 degrees of freedom
## AIC: 214.75
##
## Number of Fisher Scoring iterations: 2

Anova(model1)

## Analysis of Deviance Table (Type II tests)
##
## Response: (Prev_Tspp)
## LR Chisq Df Pr(>Chisq)
## Country 4.9833 5 0.4179

model2<-glm((Prev_Sod) ~ Country,data=data_gp, family=gaussian())
summary(model2)

##
## Call:
## glm(formula = (Prev_Sod) ~ Country, family = gaussian(), data = data_gp)
##
## Deviance Residuals:
## Min 1Q Median 3Q Max
## -70.51 -17.39 0.00 10.88 68.89
##
## Coefficients:
## Estimate Std. Error t value Pr(>|t|)
## (Intercept) 4.91 15.39 0.319 0.75406
## CountryZAM -2.86 34.41 -0.083 0.93485
## CountryUGA 65.60 21.76 3.015 0.00871 **
## CountryURT 67.58 26.65 2.535 0.02285 *
## CountryKEN 15.56 18.49 0.841 0.41332
## CountryETH 15.57 34.41 0.453 0.65737
## ---
## Signif. codes: 0 '***' 0.001 '**' 0.01 '*' 0.05 '.' 0.1 ' ' 1
##
## (Dispersion parameter for gaussian family taken to be 947.1115)
##
## Null deviance: 28563 on 20 degrees of freedom
## Residual deviance: 14207 on 15 degrees of freedom
## AIC: 210.45
##
## Number of Fisher Scoring iterations: 2

Anova(model2)

## Analysis of Deviance Table (Type II tests)
##
## Response: (Prev_Sod)
## LR Chisq Df Pr(>Chisq)
## Country 15.158 5 0.00971 **
## ---
## Signif. codes: 0 '***' 0.001 '**' 0.01 '*' 0.05 '.' 0.1 ' ' 1

data_gp$Country <- relevel(data_gp$Country, ref= "KEN")
model2<-glm((Prev_Sod) ~ Country,data=data_gp, family=gaussian())
summary(model2)

##
## Call:
## glm(formula = (Prev_Sod) ~ Country, family = gaussian(), data = data_gp)
##
## Deviance Residuals:
## Min 1Q Median 3Q Max
## -70.51 -17.39 0.00 10.88 68.89
##
## Coefficients:
## Estimate Std. Error t value Pr(>|t|)
## (Intercept) 20.471111 10.258392 1.996 0.0645 .
## CountryZIM -15.561111 18.493580 -0.841 0.4133
## CountryZAM -18.421111 32.439885 -0.568 0.5785
## CountryUGA 50.041389 18.493580 2.706 0.0163 *
## CountryURT 52.013889 24.058063 2.162 0.0472 *
## CountryETH 0.008889 32.439885 0.000 0.9998
## ---
## Signif. codes: 0 '***' 0.001 '**' 0.01 '*' 0.05 '.' 0.1 ' ' 1
##
## (Dispersion parameter for gaussian family taken to be 947.1115)
##
## Null deviance: 28563 on 20 degrees of freedom
## Residual deviance: 14207 on 15 degrees of freedom
## AIC: 210.45
##
## Number of Fisher Scoring iterations: 2

Anova(model2)

## Analysis of Deviance Table (Type II tests)
##
## Response: (Prev_Sod)
## LR Chisq Df Pr(>Chisq)
## Country 15.158 5 0.00971 **
## ---
## Signif. codes: 0 '***' 0.001 '**' 0.01 '*' 0.05 '.' 0.1 ' ' 1

data_gp$Country <- relevel(data_gp$Country, ref= "URT")
model2<-glm((Prev_Sod) ~ Country,data=data_gp, family=gaussian())
summary(model2)

##
## Call:
## glm(formula = (Prev_Sod) ~ Country, family = gaussian(), data = data_gp)
##
## Deviance Residuals:
## Min 1Q Median 3Q Max
## -70.51 -17.39 0.00 10.88 68.89
##
## Coefficients:
## Estimate Std. Error t value Pr(>|t|)
## (Intercept) 72.485 21.761 3.331 0.00456 **
## CountryKEN -52.014 24.058 -2.162 0.04719 *
## CountryZIM -67.575 26.652 -2.535 0.02285 *
## CountryZAM -70.435 37.692 -1.869 0.08132 .
## CountryUGA -1.972 26.652 -0.074 0.94198
## CountryETH -52.005 37.692 -1.380 0.18789
## ---
## Signif. codes: 0 '***' 0.001 '**' 0.01 '*' 0.05 '.' 0.1 ' ' 1
##
## (Dispersion parameter for gaussian family taken to be 947.1115)
##
## Null deviance: 28563 on 20 degrees of freedom
## Residual deviance: 14207 on 15 degrees of freedom
## AIC: 210.45
##
## Number of Fisher Scoring iterations: 2

Anova(model2)

## Analysis of Deviance Table (Type II tests)
##
## Response: (Prev_Sod)
## LR Chisq Df Pr(>Chisq)
## Country 15.158 5 0.00971 **
## ---
## Signif. codes: 0 '***' 0.001 '**' 0.01 '*' 0.05 '.' 0.1 ' ' 1

data_gp$Country <- relevel(data_gp$Country, ref= "UGA")
model2<-glm((Prev_Sod) ~ Country,data=data_gp, family=gaussian())
summary(model2)

##
## Call:
## glm(formula = (Prev_Sod) ~ Country, family = gaussian(), data = data_gp)
##
## Deviance Residuals:
## Min 1Q Median 3Q Max
## -70.51 -17.39 0.00 10.88 68.89
##
## Coefficients:
## Estimate Std. Error t value Pr(>|t|)
## (Intercept) 70.513 15.388 4.582 0.000359 ***
## CountryURT 1.972 26.652 0.074 0.941981
## CountryKEN -50.041 18.494 -2.706 0.016266 *
## CountryZIM -65.602 21.761 -3.015 0.008709 **
## CountryZAM -68.463 34.408 -1.990 0.065170 .
## CountryETH -50.032 34.408 -1.454 0.166520
## ---
## Signif. codes: 0 '***' 0.001 '**' 0.01 '*' 0.05 '.' 0.1 ' ' 1
##
## (Dispersion parameter for gaussian family taken to be 947.1115)
##
## Null deviance: 28563 on 20 degrees of freedom
## Residual deviance: 14207 on 15 degrees of freedom
## AIC: 210.45
##
## Number of Fisher Scoring iterations: 2

Anova(model2)

## Analysis of Deviance Table (Type II tests)
##
## Response: (Prev_Sod)
## LR Chisq Df Pr(>Chisq)
## Country 15.158 5 0.00971 **
## ---
## Signif. codes: 0 '***' 0.001 '**' 0.01 '*' 0.05 '.' 0.1 ' ' 1

data_gp$Country <- relevel(data_gp$Country, ref= "ZAM")
model2<-glm((Prev_Sod) ~ Country,data=data_gp, family=gaussian())
summary(model2)

##
## Call:
## glm(formula = (Prev_Sod) ~ Country, family = gaussian(), data = data_gp)
##
## Deviance Residuals:
## Min 1Q Median 3Q Max
## -70.51 -17.39 0.00 10.88 68.89
##
## Coefficients:
## Estimate Std. Error t value Pr(>|t|)
## (Intercept) 2.05 30.77 0.067 0.9478
## CountryUGA 68.46 34.41 1.990 0.0652 .
## CountryURT 70.44 37.69 1.869 0.0813 .
## CountryKEN 18.42 32.44 0.568 0.5785
## CountryZIM 2.86 34.41 0.083 0.9349
## CountryETH 18.43 43.52 0.423 0.6780
## ---
## Signif. codes: 0 '***' 0.001 '**' 0.01 '*' 0.05 '.' 0.1 ' ' 1
##
## (Dispersion parameter for gaussian family taken to be 947.1115)
##
## Null deviance: 28563 on 20 degrees of freedom
## Residual deviance: 14207 on 15 degrees of freedom
## AIC: 210.45
##
## Number of Fisher Scoring iterations: 2

Anova(model2)

## Analysis of Deviance Table (Type II tests)
##
## Response: (Prev_Sod)
## LR Chisq Df Pr(>Chisq)
## Country 15.158 5 0.00971 **
## ---
## Signif. codes: 0 '***' 0.001 '**' 0.01 '*' 0.05 '.' 0.1 ' ' 1

data_gp$Country <- relevel(data_gp$Country, ref= "ZIM")
model2<-glm((Prev_Sod) ~ Country,data=data_gp, family=gaussian())
summary(model2)

##
## Call:
## glm(formula = (Prev_Sod) ~ Country, family = gaussian(), data = data_gp)
##
## Deviance Residuals:
## Min 1Q Median 3Q Max
## -70.51 -17.39 0.00 10.88 68.89
##
## Coefficients:
## Estimate Std. Error t value Pr(>|t|)
## (Intercept) 4.91 15.39 0.319 0.75406
## CountryZAM -2.86 34.41 -0.083 0.93485
## CountryUGA 65.60 21.76 3.015 0.00871 **
## CountryURT 67.58 26.65 2.535 0.02285 *
## CountryKEN 15.56 18.49 0.841 0.41332
## CountryETH 15.57 34.41 0.453 0.65737
## ---
## Signif. codes: 0 '***' 0.001 '**' 0.01 '*' 0.05 '.' 0.1 ' ' 1
##
## (Dispersion parameter for gaussian family taken to be 947.1115)
##
## Null deviance: 28563 on 20 degrees of freedom
## Residual deviance: 14207 on 15 degrees of freedom
## AIC: 210.45
##
## Number of Fisher Scoring iterations: 2

Anova(model2)

## Analysis of Deviance Table (Type II tests)
##
## Response: (Prev_Sod)
## LR Chisq Df Pr(>Chisq)
## Country 15.158 5 0.00971 **
## ---
## Signif. codes: 0 '***' 0.001 '**' 0.01 '*' 0.05 '.' 0.1 ' ' 1

#------------------------------------------------------------------
#Gpg

data_gpg <- subset(data, Species=="Gpg")
data_gpg

## Country Localisation Species Sex Sample Prev_Sod Prev_Tspp Prev_Tc
## 4 SEN Pout Gpg NI 4 0.00 7.04 1.51
## 12 BKF Folonzo Gpg F 12 0.00 7.55 0.94
## 13 BKF Folonzo Gpg M 13 1.89 16.04 0.00
## 15 GUI Kangoliya Gpg F 15 95.74 0.00 0.00
## 18 SEN Kayar Gpg NI 18 0.00 1.14 0.00
## 25 BKF Moussodougou Gpg F 25 0.00 44.87 0.00
## 30 BKF Comoe Gpg F 30 0.00 2.82 1.41
## 32 BKF Kartasso Gpg F 32 0.00 0.00 0.00
## 33 BKF Kartasso Gpg M 33 0.00 0.00 0.00
## 34 SEN DiackSAFo Peulh Gpg NI 34 0.00 7.69 0.00
## 35 BKF Moussodougou Gpg M 35 0.00 21.88 0.00
## 40 MLI Bani Gpg F 40 0.00 1.72 0.00
## 45 BKF Kampty Gpg F 45 0.00 90.57 1.89
## 47 BKF Comoe Gpg M 47 0.00 1.92 1.92
## 48 MLI SEN Gpg M 48 0.00 7.69 1.92
## 54 BKF Bama Gpg F 54 0.00 0.00 0.00
## 56 SEN Tambacounda Gpg F 56 0.00 41.46 0.00
## 57 SEN Tambacounda Gpg M 57 0.00 71.79 0.00
## 58 SEN SebikoURTe Gpg NI 58 0.00 5.13 0.00
## 62 MLI SEN Gpg F 62 0.00 0.00 0.00
## 64 BKF Bama Gpg M 64 0.00 0.00 0.00
## 65 MLI Banco Gpg F 65 0.00 20.59 0.00
## 66 BKF Dedougou Gpg F 66 0.00 52.94 0.00
## 67 MLI Sikasso Gpg F 67 0.00 6.06 0.00
## 71 GUI Kangoliya Gpg M 71 0.00 0.00 0.00
## 77 GUI Mini Gpg F 77 0.00 3.45 0.00
## 78 SEN Hann Gpg NI 78 0.00 0.00 0.00
## 80 BKF Kampty Gpg M 80 0.00 80.77 0.00
## 82 GUI Kifala Gpg M 82 0.00 0.00 0.00
## 83 MLI Sikasso Gpg M 83 0.00 0.00 0.00
## 84 MLI SS Gpg F 84 0.00 4.00 0.00
## 86 BKF Kenedougou Gpg F 86 0.00 0.00 0.00
## 87 MLI SS Gpg M 87 0.00 0.00 0.00
## 88 BKF Dedougou Gpg M 88 0.00 69.57 4.35
## 89 GUI Bafing Gpg F 89 0.00 5.00 0.00
## 91 BKF Kampty Gpg NI 91 0.00 84.21 0.00
## 92 GUI Tinkisso Gpg M 92 0.00 5.56 0.00
## 94 BKF Kenedougou Gpg M 94 0.00 0.00 0.00
## 96 GUI Dekonkore Gpg F 96 0.00 6.25 0.00
## 97 GUI Mini Gpg M 97 0.00 0.00 0.00
## 98 SEN Fleuve Gambie Gpg M 98 0.00 43.75 0.00
## 102 GUI Bafing Gpg M 102 0.00 0.00 0.00
## 103 GUI Tinkisso Gpg F 103 0.00 7.69 0.00
## 104 BKF Bouroum bouroum Gpg F 104 0.00 92.31 0.00
## 106 GUI Karifale Gpg M 106 0.00 8.33 0.00
## 107 GUI Lemonako Gpg F 107 0.00 0.00 0.00
## 108 BKF KouriGUIon Gpg F 108 0.00 50.00 0.00
## 109 MLI Bani Gpg M 109 0.00 0.00 0.00
## 110 MLI Sybi Gpg F 110 0.00 0.00 0.00
## 111 MLI Sybi Gpg M 111 0.00 0.00 0.00
## 113 SEN Fleueve G Gpg F 113 0.00 11.11 0.00
## 114 BKF KouriGUIon Gpg NI 114 0.00 22.22 0.00
## 117 GUI Lemonako Gpg M 117 0.00 0.00 0.00
## 119 SEN Diaguiri Gpg F 119 0.00 0.00 0.00
## 120 MLI Banco Gpg M 120 0.00 28.57 0.00
## 121 MLI Baoule Gpg F 121 0.00 42.86 0.00
## 122 MLI Baoule Gpg M 122 0.00 42.86 0.00
## 123 MLI Bougouni Gpg M 123 0.00 0.00 0.00
## 124 BKF Lorepeni Gpg F 124 0.00 71.43 0.00
## 127 SEN MousSAFlla Gpg M 127 0.00 0.00 0.00
## 128 MLI Baguineda Gpg F 128 0.00 16.67 0.00
## 129 MLI Bougouni Gpg F 129 0.00 0.00 0.00
## 130 MLI Kita Gpg M 130 0.00 16.67 0.00
## 136 GUI Kifala Gpg F 136 0.00 0.00 0.00
## 137 BKF Bouroum bouroum Gpg M 137 0.00 80.00 0.00
## 138 SEN Fleuve Gambie Gpg F 138 0.00 25.00 0.00
## 143 SEN Niokolo Gpg M 143 0.00 0.00 0.00
## 145 BKF Lorepeni Gpg M 145 0.00 100.00 0.00
## 146 BKF KouriGUIon Gpg M 146 0.00 66.67 0.00
## 147 BKF Ouarkoye Gpg M 147 0.00 100.00 0.00
## 150 SEN Diaguiri Gpg M 150 0.00 50.00 0.00
## 151 BKF Ouarkoye Gpg F 151 0.00 100.00 50.00
## 156 GUI Karifale Gpg F 156 0.00 0.00 0.00
## 157 SEN Mako Gpg M 157 0.00 100.00 0.00
## Prev_Tv Prev_Tz Prev_Tsg Prev_TcTv Prev_TcTz Prev_TcTsg Prev_TvTz
## 4 2.01 0.50 3.02 0 0.00 0.00 0.00
## 12 2.83 1.89 0.00 0 0.00 0.00 1.89
## 13 5.66 5.66 0.00 0 1.89 0.00 2.83
## 15 0.00 0.00 0.00 0 0.00 0.00 0.00
## 18 0.00 0.00 1.14 0 0.00 0.00 0.00
## 25 20.51 12.82 0.00 0 0.00 0.00 11.54
## 30 1.41 0.00 0.00 0 0.00 0.00 0.00
## 32 0.00 0.00 0.00 0 0.00 0.00 0.00
## 33 0.00 0.00 0.00 0 0.00 0.00 0.00
## 34 1.54 1.54 4.62 0 0.00 0.00 0.00
## 35 6.25 15.63 0.00 0 0.00 0.00 0.00
## 40 1.72 0.00 0.00 0 0.00 0.00 0.00
## 45 62.26 1.89 11.32 0 0.00 0.00 0.00
## 47 0.00 0.00 0.00 0 0.00 0.00 0.00
## 48 1.92 3.85 0.00 0 0.00 0.00 0.00
## 54 0.00 0.00 0.00 0 0.00 0.00 0.00
## 56 26.83 7.32 0.00 0 0.00 0.00 7.32
## 57 53.85 2.56 0.00 0 0.00 0.00 15.38
## 58 5.13 0.00 0.00 0 0.00 0.00 0.00
## 62 0.00 0.00 0.00 0 0.00 0.00 0.00
## 64 0.00 0.00 0.00 0 0.00 0.00 0.00
## 65 20.59 0.00 0.00 0 0.00 0.00 0.00
## 66 26.47 0.00 23.53 0 0.00 0.00 0.00
## 67 0.00 6.06 0.00 0 0.00 0.00 0.00
## 71 0.00 0.00 0.00 0 0.00 0.00 0.00
## 77 3.45 0.00 0.00 0 0.00 0.00 0.00
## 78 0.00 0.00 0.00 0 0.00 0.00 0.00
## 80 65.38 0.00 7.69 0 0.00 0.00 0.00
## 82 0.00 0.00 0.00 0 0.00 0.00 0.00
## 83 0.00 0.00 0.00 0 0.00 0.00 0.00
## 84 4.00 0.00 0.00 0 0.00 0.00 0.00
## 86 0.00 0.00 0.00 0 0.00 0.00 0.00
## 87 0.00 0.00 0.00 0 0.00 0.00 0.00
## 88 30.43 13.04 4.35 0 0.00 4.35 0.00
## 89 5.00 0.00 0.00 0 0.00 0.00 0.00
## 91 26.32 5.26 21.05 0 0.00 0.00 0.00
## 92 5.56 0.00 0.00 0 0.00 0.00 0.00
## 94 0.00 0.00 0.00 0 0.00 0.00 0.00
## 96 6.25 0.00 0.00 0 0.00 0.00 0.00
## 97 0.00 0.00 0.00 0 0.00 0.00 0.00
## 98 43.75 0.00 0.00 0 0.00 0.00 0.00
## 102 0.00 0.00 0.00 0 0.00 0.00 0.00
## 103 7.69 0.00 0.00 0 0.00 0.00 0.00
## 104 53.85 0.00 23.08 0 0.00 0.00 0.00
## 106 8.33 0.00 0.00 0 0.00 0.00 0.00
## 107 8.33 0.00 0.00 0 0.00 0.00 0.00
## 108 0.00 0.00 33.33 0 0.00 0.00 0.00
## 109 0.00 0.00 0.00 0 0.00 0.00 0.00
## 110 0.00 0.00 0.00 0 0.00 0.00 0.00
## 111 0.00 0.00 0.00 0 0.00 0.00 0.00
## 113 11.11 0.00 0.00 0 0.00 0.00 0.00
## 114 0.00 0.00 11.11 0 0.00 0.00 0.00
## 117 0.00 0.00 0.00 0 0.00 0.00 0.00
## 119 0.00 0.00 0.00 0 0.00 0.00 0.00
## 120 28.57 0.00 0.00 0 0.00 0.00 0.00
## 121 42.86 0.00 0.00 0 0.00 0.00 0.00
## 122 42.86 0.00 0.00 0 0.00 0.00 0.00
## 123 0.00 0.00 0.00 0 0.00 0.00 0.00
## 124 14.29 0.00 28.57 0 0.00 0.00 0.00
## 127 0.00 0.00 0.00 0 0.00 0.00 0.00
## 128 16.67 0.00 0.00 0 0.00 0.00 0.00
## 129 0.00 0.00 0.00 0 0.00 0.00 0.00
## 130 16.67 0.00 0.00 0 0.00 0.00 0.00
## 136 0.00 0.00 0.00 0 0.00 0.00 0.00
## 137 40.00 0.00 20.00 0 0.00 0.00 0.00
## 138 25.00 0.00 0.00 0 0.00 0.00 0.00
## 143 66.67 0.00 0.00 0 0.00 0.00 0.00
## 145 0.00 0.00 0.00 0 0.00 0.00 0.00
## 146 33.33 0.00 0.00 0 0.00 0.00 0.00
## 147 33.33 0.00 0.00 0 0.00 0.00 0.00
## 150 0.00 50.00 0.00 0 0.00 0.00 0.00
## 151 50.00 0.00 0.00 0 0.00 0.00 0.00
## 156 0.00 0.00 0.00 0 0.00 0.00 0.00
## 157 100.00 0.00 0.00 0 0.00 0.00 0.00
## Prev_TvTsg Prev_TzTsg Prev_TcTvTz
## 4 0.00 0.00 0
## 12 0.00 0.00 0
## 13 0.00 0.00 0
## 15 0.00 0.00 0
## 18 0.00 0.00 0
## 25 0.00 0.00 0
## 30 0.00 0.00 0
## 32 0.00 0.00 0
## 33 0.00 0.00 0
## 34 0.00 0.00 0
## 35 0.00 0.00 0
## 40 0.00 0.00 0
## 45 9.43 3.77 0
## 47 0.00 0.00 0
## 48 0.00 0.00 0
## 54 0.00 0.00 0
## 56 0.00 0.00 0
## 57 0.00 0.00 0
## 58 0.00 0.00 0
## 62 0.00 0.00 0
## 64 0.00 0.00 0
## 65 0.00 0.00 0
## 66 2.94 0.00 0
## 67 0.00 0.00 0
## 71 0.00 0.00 0
## 77 0.00 0.00 0
## 78 0.00 0.00 0
## 80 7.69 0.00 0
## 82 0.00 0.00 0
## 83 0.00 0.00 0
## 84 0.00 0.00 0
## 86 0.00 0.00 0
## 87 0.00 0.00 0
## 88 4.35 8.70 0
## 89 0.00 0.00 0
## 91 31.58 0.00 0
## 92 0.00 0.00 0
## 94 0.00 0.00 0
## 96 0.00 0.00 0
## 97 0.00 0.00 0
## 98 0.00 0.00 0
## 102 0.00 0.00 0
## 103 0.00 0.00 0
## 104 15.38 0.00 0
## 106 0.00 0.00 0
## 107 0.00 0.00 0
## 108 16.67 0.00 0
## 109 0.00 0.00 0
## 110 0.00 0.00 0
## 111 0.00 0.00 0
## 113 0.00 0.00 0
## 114 11.11 0.00 0
## 117 0.00 0.00 0
## 119 0.00 0.00 0
## 120 0.00 0.00 0
## 121 0.00 0.00 0
## 122 0.00 0.00 0
## 123 0.00 0.00 0
## 124 28.57 0.00 0
## 127 0.00 0.00 0
## 128 0.00 0.00 0
## 129 0.00 0.00 0
## 130 0.00 0.00 0
## 136 0.00 0.00 0
## 137 20.00 0.00 0
## 138 0.00 0.00 0
## 143 0.00 0.00 0
## 145 66.67 33.33 0
## 146 33.33 0.00 0
## 147 33.33 33.33 0
## 150 0.00 0.00 0
## 151 0.00 0.00 0
## 156 0.00 0.00 0
## 157 0.00 0.00 0

model1<-glm((Prev_Tspp) ~ Country,data=data_gpg, family=gaussian())
summary(model1)

##
## Call:
## glm(formula = (Prev_Tspp) ~ Country, family = gaussian(), data = data_gpg)
##
## Deviance Residuals:
## Min 1Q Median 3Q Max
## -44.453 -17.072 -2.419 15.430 75.726
##
## Coefficients:
## Estimate Std. Error t value Pr(>|t|)
## (Intercept) 24.274 7.268 3.340 0.00135 **
## CountryMLI -13.847 9.842 -1.407 0.16386
## CountryGUI -21.855 10.279 -2.126 0.03702 *
## CountryBKF 20.179 9.127 2.211 0.03032 *
## ---
## Signif. codes: 0 '***' 0.001 '**' 0.01 '*' 0.05 '.' 0.1 ' ' 1
##
## (Dispersion parameter for gaussian family taken to be 792.4573)
##
## Null deviance: 76638 on 73 degrees of freedom
## Residual deviance: 55472 on 70 degrees of freedom
## AIC: 709.85
##
## Number of Fisher Scoring iterations: 2

Anova(model1)

## Analysis of Deviance Table (Type II tests)
##
## Response: (Prev_Tspp)
## LR Chisq Df Pr(>Chisq)
## Country 26.709 3 6.776e-06 ***
## ---
## Signif. codes: 0 '***' 0.001 '**' 0.01 '*' 0.05 '.' 0.1 ' ' 1

model2<-glm((Prev_Sod) ~ Country,data=data_gpg, family=gaussian())
summary(model2)

##
## Call:
## glm(formula = (Prev_Sod) ~ Country, family = gaussian(), data = data_gpg)
##
## Deviance Residuals:
## Min 1Q Median 3Q Max
## -6.383 -0.073 -0.073 0.000 89.357
##
## Coefficients:
## Estimate Std. Error t value Pr(>|t|)
## (Intercept) 1.424e-14 2.855e+00 0.000 1.000
## CountryMLI -1.781e-14 3.866e+00 0.000 1.000
## CountryGUI 6.383e+00 4.038e+00 1.581 0.118
## CountryBKF 7.269e-02 3.585e+00 0.020 0.984
##
## (Dispersion parameter for gaussian family taken to be 122.2644)
##
## Null deviance: 9040.9 on 73 degrees of freedom
## Residual deviance: 8558.5 on 70 degrees of freedom
## AIC: 571.55
##
## Number of Fisher Scoring iterations: 2

Anova(model2)

## Analysis of Deviance Table (Type II tests)
##
## Response: (Prev_Sod)
## LR Chisq Df Pr(>Chisq)
## Country 3.9456 3 0.2674

data_gpg$Country <- relevel(data_gpg$Country, ref= "GUI")
model1<-glm((Prev_Tspp) ~ Country,data=data_gpg, family=gaussian())
summary(model1)

##
## Call:
## glm(formula = (Prev_Tspp) ~ Country, family = gaussian(), data = data_gpg)
##
## Deviance Residuals:
## Min 1Q Median 3Q Max
## -44.453 -17.072 -2.419 15.430 75.726
##
## Coefficients:
## Estimate Std. Error t value Pr(>|t|)
## (Intercept) 2.419 7.268 0.333 0.740
## CountrySEN 21.855 10.279 2.126 0.037 *
## CountryMLI 8.009 9.842 0.814 0.419
## CountryBKF 42.034 9.127 4.605 1.79e-05 ***
## ---
## Signif. codes: 0 '***' 0.001 '**' 0.01 '*' 0.05 '.' 0.1 ' ' 1
##
## (Dispersion parameter for gaussian family taken to be 792.4573)
##
## Null deviance: 76638 on 73 degrees of freedom
## Residual deviance: 55472 on 70 degrees of freedom
## AIC: 709.85
##
## Number of Fisher Scoring iterations: 2

Anova(model1)

## Analysis of Deviance Table (Type II tests)
##
## Response: (Prev_Tspp)
## LR Chisq Df Pr(>Chisq)
## Country 26.709 3 6.776e-06 ***
## ---
## Signif. codes: 0 '***' 0.001 '**' 0.01 '*' 0.05 '.' 0.1 ' ' 1

data_gpg$Country <- relevel(data_gpg$Country, ref= "MLI")
model1<-glm((Prev_Tspp) ~ Country,data=data_gpg, family=gaussian())
summary(model1)

##
## Call:
## glm(formula = (Prev_Tspp) ~ Country, family = gaussian(), data = data_gpg)
##
## Deviance Residuals:
## Min 1Q Median 3Q Max
## -44.453 -17.072 -2.419 15.430 75.726
##
## Coefficients:
## Estimate Std. Error t value Pr(>|t|)
## (Intercept) 10.427 6.635 1.572 0.120574
## CountryGUI -8.009 9.842 -0.814 0.418547
## CountrySEN 13.847 9.842 1.407 0.163860
## CountryBKF 34.025 8.632 3.942 0.000189 ***
## ---
## Signif. codes: 0 '***' 0.001 '**' 0.01 '*' 0.05 '.' 0.1 ' ' 1
##
## (Dispersion parameter for gaussian family taken to be 792.4573)
##
## Null deviance: 76638 on 73 degrees of freedom
## Residual deviance: 55472 on 70 degrees of freedom
## AIC: 709.85
##
## Number of Fisher Scoring iterations: 2

Anova(model1)

## Analysis of Deviance Table (Type II tests)
##
## Response: (Prev_Tspp)
## LR Chisq Df Pr(>Chisq)
## Country 26.709 3 6.776e-06 ***
## ---
## Signif. codes: 0 '***' 0.001 '**' 0.01 '*' 0.05 '.' 0.1 ' ' 1

data_gpg$Country <- relevel(data_gpg$Country, ref= "SEN")
model1<-glm((Prev_Tspp) ~ Country,data=data_gpg, family=gaussian())
summary(model1)

##
## Call:
## glm(formula = (Prev_Tspp) ~ Country, family = gaussian(), data = data_gpg)
##
## Deviance Residuals:
## Min 1Q Median 3Q Max
## -44.453 -17.072 -2.419 15.430 75.726
##
## Coefficients:
## Estimate Std. Error t value Pr(>|t|)
## (Intercept) 24.274 7.268 3.340 0.00135 **
## CountryMLI -13.847 9.842 -1.407 0.16386
## CountryGUI -21.855 10.279 -2.126 0.03702 *
## CountryBKF 20.179 9.127 2.211 0.03032 *
## ---
## Signif. codes: 0 '***' 0.001 '**' 0.01 '*' 0.05 '.' 0.1 ' ' 1
##
## (Dispersion parameter for gaussian family taken to be 792.4573)
##
## Null deviance: 76638 on 73 degrees of freedom
## Residual deviance: 55472 on 70 degrees of freedom
## AIC: 709.85
##
## Number of Fisher Scoring iterations: 2

Anova(model1)

## Analysis of Deviance Table (Type II tests)
##
## Response: (Prev_Tspp)
## LR Chisq Df Pr(>Chisq)
## Country 26.709 3 6.776e-06 ***
## ---
## Signif. codes: 0 '***' 0.001 '**' 0.01 '*' 0.05 '.' 0.1 ' ' 1

#-------------------------------------------------------------
#Gt

data_gt <- subset(data, Species=="Gt")
data_gt

## Country Localisation Species Sex Sample Prev_Sod Prev_Tspp Prev_Tc Prev_Tv
## 2 BKF Comoe Gt F 2 0 16.54 1.10 13.24
## 3 BKF Comoe Gt M 3 0 15.00 3.64 11.36
## 11 BKF Folonzo Gt F 11 0 18.87 1.89 12.26
## 14 BKF Folonzo Gt M 14 0 32.63 2.11 27.37
## 24 GHA Walewale Gt M 24 0 53.85 3.85 12.82
## 43 GHA Walewale Gt F 43 0 66.04 1.89 9.43
## 44 BKF Arly Gt F 44 0 1.89 0.00 0.00
## 55 BKF Arly Gt M 55 0 0.00 0.00 0.00
## 69 GHA MorURTi Gt M 69 0 50.00 0.00 15.63
## 70 BKF Sissili Gt M 70 0 25.00 12.50 12.50
## 95 GHA Bougouhiya Gt F 95 0 18.75 0.00 6.25
## 99 BKF Sissili Gt F 99 0 13.33 6.67 6.67
## 112 GHA MorURTi Gt F 112 0 66.67 0.00 0.00
## 116 GHA Fumbissi Gt F 116 0 100.00 0.00 0.00
## 125 GHA Fumbissi Gt M 125 0 100.00 0.00 66.67
## 126 GHA Grogro Gt M 126 0 100.00 0.00 0.00
## 133 GHA Grogro Gt F 133 0 100.00 0.00 80.00
## 134 GHA Kumpole Gt F 134 0 100.00 0.00 40.00
## 135 GHA Sissili Bidge Gt F 135 0 100.00 0.00 20.00
## 142 GHA Bougouhiya Gt M 142 0 0.00 0.00 0.00
## 148 GHA Kumpole Gt M 148 0 100.00 0.00 50.00
## 149 GHA Psikp_ Gt M 149 0 100.00 0.00 0.00
## 152 GHA Kandiaga Gt M 152 0 100.00 0.00 0.00
## 153 GHA Sissili Bidge Gt M 153 0 100.00 0.00 0.00
## 154 GHA Nabogo Gt F 154 0 0.00 0.00 0.00
## 155 GHA Volta Blanche Gt F 155 0 0.00 0.00 0.00
## Prev_Tz Prev_Tsg Prev_TcTv Prev_TcTz Prev_TcTsg Prev_TvTz Prev_TvTsg
## 2 0.37 0 0.74 1.10 0 0.00 0
## 3 0.00 0 0.00 0.00 0 0.00 0
## 11 1.89 0 1.89 0.94 0 0.00 0
## 14 1.05 0 0.00 1.05 0 1.05 0
## 24 8.97 0 0.00 10.26 0 14.10 0
## 43 24.53 0 0.00 16.98 0 7.55 0
## 44 1.89 0 0.00 0.00 0 0.00 0
## 55 0.00 0 0.00 0.00 0 0.00 0
## 69 15.63 0 0.00 18.75 0 0.00 0
## 70 0.00 0 0.00 0.00 0 0.00 0
## 95 0.00 0 0.00 0.00 0 12.50 0
## 99 0.00 0 0.00 0.00 0 0.00 0
## 112 33.33 0 0.00 22.22 0 11.11 0
## 116 37.50 0 0.00 0.00 0 62.50 0
## 125 33.33 0 0.00 0.00 0 0.00 0
## 126 16.67 0 0.00 0.00 0 83.33 0
## 133 20.00 0 0.00 0.00 0 0.00 0
## 134 60.00 0 0.00 0.00 0 0.00 0
## 135 80.00 0 0.00 0.00 0 0.00 0
## 142 0.00 0 0.00 0.00 0 0.00 0
## 148 50.00 0 0.00 0.00 0 0.00 0
## 149 50.00 0 0.00 0.00 0 50.00 0
## 152 100.00 0 0.00 0.00 0 0.00 0
## 153 100.00 0 0.00 0.00 0 0.00 0
## 154 0.00 0 0.00 0.00 0 0.00 0
## 155 0.00 0 0.00 0.00 0 0.00 0
## Prev_TzTsg Prev_TcTvTz
## 2 0 0.00
## 3 0 0.00
## 11 0 0.00
## 14 0 0.00
## 24 0 1.28
## 43 0 5.66
## 44 0 0.00
## 55 0 0.00
## 69 0 0.00
## 70 0 0.00
## 95 0 0.00
## 99 0 0.00
## 112 0 0.00
## 116 0 0.00
## 125 0 0.00
## 126 0 0.00
## 133 0 0.00
## 134 0 0.00
## 135 0 0.00
## 142 0 0.00
## 148 0 0.00
## 149 0 0.00
## 152 0 0.00
## 153 0 0.00
## 154 0 0.00
## 155 0 0.00

model1<-glm((Prev_Tspp) ~ Country,data=data_gt, family=gaussian())
summary(model1)

##
## Call:
## glm(formula = (Prev_Tspp) ~ Country, family = gaussian(), data = data_gt)
##
## Deviance Residuals:
## Min 1Q Median 3Q Max
## -69.739 -14.935 2.297 30.261 30.261
##
## Coefficients:
## Estimate Std. Error t value Pr(>|t|)
## (Intercept) 69.739 8.028 8.687 7.12e-09 ***
## CountryBKF -54.332 14.472 -3.754 0.000978 ***
## ---
## Signif. codes: 0 '***' 0.001 '**' 0.01 '*' 0.05 '.' 0.1 ' ' 1
##
## (Dispersion parameter for gaussian family taken to be 1159.976)
##
## Null deviance: 44189 on 25 degrees of freedom
## Residual deviance: 27839 on 24 degrees of freedom
## AIC: 261.16
##
## Number of Fisher Scoring iterations: 2

Anova(model1)

## Analysis of Deviance Table (Type II tests)
##
## Response: (Prev_Tspp)
## LR Chisq Df Pr(>Chisq)
## Country 14.095 1 0.0001738 ***
## ---
## Signif. codes: 0 '***' 0.001 '**' 0.01 '*' 0.05 '.' 0.1 ' ' 1

model2<-glm((Prev_Sod) ~ Country,data=data_gt, family=gaussian())
summary(model2)

##
## Call:
## glm(formula = (Prev_Sod) ~ Country, family = gaussian(), data = data_gt)
##
## Deviance Residuals:
## Min 1Q Median 3Q Max
## 0 0 0 0 0
##
## Coefficients:
## Estimate Std. Error t value Pr(>|t|)
## (Intercept) 0 0 NA NA
## CountryBKF 0 0 NA NA
##
## (Dispersion parameter for gaussian family taken to be 0)
##
## Null deviance: 0 on 25 degrees of freedom
## Residual deviance: 0 on 24 degrees of freedom
## AIC: -Inf
##
## Number of Fisher Scoring iterations: 1

Anova(model2)

## Analysis of Deviance Table (Type II tests)
##
## Response: (Prev_Sod)
## LR Chisq Df Pr(>Chisq)
## Country 1

## Selecting the GLM model for trypanosome species and mixed infection

#TC selection model
model1<-glm((Prev_Tc) ~ Country,data=data, family=gaussian())
model2<-glm((Prev_Tc) ~ Species,data=data, family=gaussian())
model3<-glm((Prev_Tc) ~ Country*Species,data=data, family=gaussian())
model4<-glm((Prev_Tc) ~ Country+Species,data=data, family=gaussian())
model5<-glm((Prev_Tc) ~ Country*Species+Localisation,data=data, family=gaussian())
model6<-glm((Prev_Tc) ~ Country+Species+Localisation,data=data, family=gaussian())

#AICc(model1, model2, model3, model4)
model.set <- list(model1, model2, model3, model4, model5, model6)
model.names <- c("model1", "model2","model3", "model4", "model5", "model6")

aictab(model.set, modnames = model.names)

##
## Model selection based on AICc:
##
## K AICc Delta_AICc AICcWt Cum.Wt LL
## model2 11 1077.78 0.00 0.43 0.43 -526.97
## model4 23 1078.08 0.30 0.37 0.81 -511.86
## model3 27 1079.90 2.12 0.15 0.96 -507.04
## model1 16 1082.45 4.67 0.04 1.00 -523.27
## model6 100 1416.98 339.20 0.00 1.00 -424.85
## model5 103 1455.28 377.50 0.00 1.00 -418.64

summary(model1)

##
## Call:
## glm(formula = (Prev_Tc) ~ Country, family = gaussian(), data = data)
##
## Deviance Residuals:
## Min 1Q Median 3Q Max
## -13.594 -3.404 -0.107 0.000 46.596
##
## Coefficients:
## Estimate Std. Error t value Pr(>|t|)
## (Intercept) 4.764 2.304 2.068 0.04048 *
## CountryZAM -3.394 7.641 -0.444 0.65759
## CountrySAF 0.126 3.456 0.036 0.97097
## CountryUGA -2.162 3.990 -0.542 0.58881
## CountryURT 4.983 3.762 1.324 0.18751
## CountrySWA -4.764 7.641 -0.623 0.53398
## CountrySEN -4.663 2.974 -1.568 0.11915
## CountryZAI -4.764 7.641 -0.623 0.53398
## CountryMOZ -1.764 5.643 -0.313 0.75506
## CountryMLI -4.657 2.873 -1.621 0.10729
## CountryKEN 9.890 3.119 3.170 0.00187 **
## CountryETH 1.336 7.641 0.175 0.86145
## CountryGUI -4.764 2.974 -1.602 0.11145
## CountryGHA -4.445 2.873 -1.547 0.12411
## CountryBKF -1.360 2.558 -0.532 0.59568
## ---
## Signif. codes: 0 '***' 0.001 '**' 0.01 '*' 0.05 '.' 0.1 ' ' 1
##
## (Dispersion parameter for gaussian family taken to be 53.07752)
##
## Null deviance: 10017.9 on 155 degrees of freedom
## Residual deviance: 7483.9 on 141 degrees of freedom
## AIC: 1078.5
##
## Number of Fisher Scoring iterations: 2

Anova(model1)

## Analysis of Deviance Table (Type II tests)
##
## Response: (Prev_Tc)
## LR Chisq Df Pr(>Chisq)
## Country 47.741 14 1.451e-05 ***
## ---
## Signif. codes: 0 '***' 0.001 '**' 0.01 '*' 0.05 '.' 0.1 ' ' 1

#model2 is the best AICc=1084.04
Anova(model2)

## Analysis of Deviance Table (Type II tests)
##
## Response: (Prev_Tc)
## LR Chisq Df Pr(>Chisq)
## Species 40.364 9 6.527e-06 ***
## ---
## Signif. codes: 0 '***' 0.001 '**' 0.01 '*' 0.05 '.' 0.1 ' ' 1

#-------------------------------------------------------------------------
#Tv selection model
model1<-glm((Prev_Tv) ~ Country,data=data, family=gaussian())
model2<-glm((Prev_Tv) ~ Species,data=data, family=gaussian())
model3<-glm((Prev_Tv) ~ Country*Species,data=data, family=gaussian())
model4<-glm((Prev_Tv) ~ Country+Species,data=data, family=gaussian())
model5<-glm((Prev_Tv) ~ Country*Species+Localisation,data=data, family=gaussian())
model6<-glm((Prev_Tv) ~ Country+Species+Localisation,data=data, family=gaussian())

#AICc(model1, model2, model3, model4)
model.set <- list(model1, model2, model3, model4, model5, model6)
model.names <- c("model1", "model2","model3", "model4", "model5", "model6")

aictab(model.set, modnames = model.names)

##
## Model selection based on AICc:
##
## K AICc Delta_AICc AICcWt Cum.Wt LL
## model2 11 1352.64 0.00 0.51 0.51 -664.40
## model1 16 1352.73 0.09 0.49 1.00 -658.41
## model4 23 1368.94 16.30 0.00 1.00 -657.29
## model3 27 1380.29 27.66 0.00 1.00 -657.24
## model6 100 1652.45 299.82 0.00 1.00 -542.59
## model5 103 1703.17 350.54 0.00 1.00 -542.59

summary(model1)

##
## Call:
## glm(formula = (Prev_Tv) ~ Country, family = gaussian(), data = data)
##
## Deviance Residuals:
## Min 1Q Median 3Q Max
## -22.393 -9.770 -1.427 3.072 77.607
##
## Coefficients:
## Estimate Std. Error t value Pr(>|t|)
## (Intercept) 0.5560 5.4787 0.101 0.91931
## CountryZAM 0.1240 18.1708 0.007 0.99456
## CountrySAF 0.3465 8.2180 0.042 0.96643
## CountryUGA -0.1300 9.4894 -0.014 0.98909
## CountryURT 1.2173 8.9467 0.136 0.89196
## CountrySWA -0.5560 18.1708 -0.031 0.97563
## CountrySEN 21.8367 7.0730 3.087 0.00243 **
## CountryZAI 2.3040 18.1708 0.127 0.89928
## CountryMOZ 0.4440 13.4200 0.033 0.97365
## CountryMLI 9.2140 6.8331 1.348 0.17968
## CountryKEN 4.2640 7.4182 0.575 0.56634
## CountryETH 0.0940 18.1708 0.005 0.99588
## CountryGUI 2.4180 7.0730 0.342 0.73296
## CountryGHA 16.1551 6.8331 2.364 0.01943 *
## CountryBKF 14.6205 6.0825 2.404 0.01753 *
## ---
## Signif. codes: 0 '***' 0.001 '**' 0.01 '*' 0.05 '.' 0.1 ' ' 1
##
## (Dispersion parameter for gaussian family taken to be 300.1614)
##
## Null deviance: 50549 on 155 degrees of freedom
## Residual deviance: 42323 on 141 degrees of freedom
## AIC: 1348.8
##
## Number of Fisher Scoring iterations: 2

Anova(model1)

## Analysis of Deviance Table (Type II tests)
##
## Response: (Prev_Tv)
## LR Chisq Df Pr(>Chisq)
## Country 27.404 14 0.01705 *
## ---
## Signif. codes: 0 '***' 0.001 '**' 0.01 '*' 0.05 '.' 0.1 ' ' 1

#model1 is the best AICc= 1360.14
Anova(model2)

## Analysis of Deviance Table (Type II tests)
##
## Response: (Prev_Tv)
## LR Chisq Df Pr(>Chisq)
## Species 15.475 9 0.07868 .
## ---
## Signif. codes: 0 '***' 0.001 '**' 0.01 '*' 0.05 '.' 0.1 ' ' 1

#-------------------------------------------------------------------------
#Tz selection model
model1<-glm((Prev_Tz) ~ Country,data=data, family=gaussian())
model2<-glm((Prev_Tz) ~ Species,data=data, family=gaussian())
model3<-glm((Prev_Tz) ~ Country*Species,data=data, family=gaussian())
model4<-glm((Prev_Tz) ~ Country+Species,data=data, family=gaussian())
model5<-glm((Prev_Tz) ~ Country*Species+Localisation,data=data, family=gaussian())
model6<-glm((Prev_Tz) ~ Country+Species+Localisation,data=data, family=gaussian())

#AICc(model1, model2, model3, model4)
model.set <- list(model1, model2, model3, model4, model5, model6)
model.names <- c("model1", "model2","model3", "model4", "model5", "model6")

aictab(model.set, modnames = model.names)

##
## Model selection based on AICc:
##
## K AICc Delta_AICc AICcWt Cum.Wt LL
## model1 16 1260.42 0.00 1 1 -612.25
## model4 23 1272.68 12.25 0 1 -609.16
## model2 11 1283.49 23.07 0 1 -629.83
## model3 27 1284.10 23.68 0 1 -609.14
## model6 100 1444.79 184.37 0 1 -438.76
## model5 103 1495.05 234.63 0 1 -438.53

summary(model1)

##
## Call:
## glm(formula = (Prev_Tz) ~ Country, family = gaussian(), data = data)
##
## Deviance Residuals:
## Min 1Q Median 3Q Max
## -34.998 -3.008 -1.012 0.000 65.002
##
## Coefficients:
## Estimate Std. Error t value Pr(>|t|)
## (Intercept) 1.0250 4.0756 0.251 0.802
## CountryZAM -0.3450 13.5173 -0.026 0.980
## CountrySAF 2.9287 6.1134 0.479 0.633
## CountryUGA -0.0130 7.0591 -0.002 0.999
## CountryURT 4.0150 6.6554 0.603 0.547
## CountrySWA -1.0250 13.5173 -0.076 0.940
## CountrySEN 3.1030 5.2616 0.590 0.556
## CountryZAI -1.0250 13.5173 -0.076 0.940
## CountryMOZ -1.0250 9.9832 -0.103 0.918
## CountryMLI -0.4744 5.0832 -0.093 0.926
## CountryKEN -0.6000 5.5184 -0.109 0.914
## CountryETH 0.0650 13.5173 0.005 0.996
## CountryGUI -1.0250 5.2616 -0.195 0.846
## CountryGHA 33.9728 5.0832 6.683 5.02e-10 ***
## CountryBKF 1.9827 4.5248 0.438 0.662
## ---
## Signif. codes: 0 '***' 0.001 '**' 0.01 '*' 0.05 '.' 0.1 ' ' 1
##
## (Dispersion parameter for gaussian family taken to be 166.1055)
##
## Null deviance: 41046 on 155 degrees of freedom
## Residual deviance: 23421 on 141 degrees of freedom
## AIC: 1256.5
##
## Number of Fisher Scoring iterations: 2

Anova(model1)

## Analysis of Deviance Table (Type II tests)
##
## Response: (Prev_Tz)
## LR Chisq Df Pr(>Chisq)
## Country 106.11 14 3.167e-16 ***
## ---
## Signif. codes: 0 '***' 0.001 '**' 0.01 '*' 0.05 '.' 0.1 ' ' 1

#model1 is the best AICc= 1267.24
Anova(model2)

## Analysis of Deviance Table (Type II tests)
##
## Response: (Prev_Tz)
## LR Chisq Df Pr(>Chisq)
## Species 58.253 9 2.906e-09 ***
## ---
## Signif. codes: 0 '***' 0.001 '**' 0.01 '*' 0.05 '.' 0.1 ' ' 1

#-------------------------------------------------------------------------
#Tsg selection model
model1<-glm((Prev_Tsg) ~ Country,data=data, family=gaussian())
model2<-glm((Prev_Tsg) ~ Species,data=data, family=gaussian())
model3<-glm((Prev_Tsg) ~ Country*Species,data=data, family=gaussian())
model4<-glm((Prev_Tsg) ~ Country+Species,data=data, family=gaussian())
model5<-glm((Prev_Tsg) ~ Country*Species+Localisation,data=data, family=gaussian())
model6<-glm((Prev_Tsg) ~ Country+Species+Localisation,data=data, family=gaussian())

#AICc(model1, model2, model3, model4)
model.set <- list(model1, model2, model3, model4, model5, model6)
model.names <- c("model1", "model2","model3", "model4", "model5", "model6")

aictab(model.set, modnames = model.names)

##
## Model selection based on AICc:
##
## K AICc Delta_AICc AICcWt Cum.Wt LL
## model2 11 1203.33 0.00 0.78 0.78 -589.75
## model1 16 1205.83 2.50 0.22 1.00 -584.96
## model4 23 1214.77 11.45 0.00 1.00 -580.21
## model3 27 1223.72 20.40 0.00 1.00 -578.96
## model6 100 1364.93 161.60 0.00 1.00 -398.83
## model5 103 1409.96 206.63 0.00 1.00 -395.98

summary(model1)

##
## Call:
## glm(formula = (Prev_Tsg) ~ Country, family = gaussian(), data = data)
##
## Deviance Residuals:
## Min 1Q Median 3Q Max
## -16.34 -4.28 0.00 0.00 57.34
##
## Coefficients:
## Estimate Std. Error t value Pr(>|t|)
## (Intercept) 16.343 3.421 4.777 4.42e-06 ***
## CountryZAM 18.587 11.347 1.638 0.103654
## CountrySAF -5.649 5.132 -1.101 0.272872
## CountryUGA -11.315 5.926 -1.909 0.058245 .
## CountryURT -9.540 5.587 -1.707 0.089940 .
## CountrySWA -16.343 11.347 -1.440 0.152018
## CountrySEN -15.758 4.417 -3.568 0.000493 ***
## CountryZAI -16.343 11.347 -1.440 0.152018
## CountryMOZ -13.343 8.381 -1.592 0.113597
## CountryMLI -16.343 4.267 -3.830 0.000192 ***
## CountryKEN -1.720 4.633 -0.371 0.711037
## CountryETH -5.883 11.347 -0.518 0.604963
## CountryGUI -16.343 4.417 -3.700 0.000308 ***
## CountryGHA -16.343 4.267 -3.830 0.000192 ***
## CountryBKF -12.063 3.798 -3.176 0.001835 **
## ---
## Signif. codes: 0 '***' 0.001 '**' 0.01 '*' 0.05 '.' 0.1 ' ' 1
##
## (Dispersion parameter for gaussian family taken to be 117.0589)
##
## Null deviance: 21742 on 155 degrees of freedom
## Residual deviance: 16505 on 141 degrees of freedom
## AIC: 1201.9
##
## Number of Fisher Scoring iterations: 2

Anova(model1)

## Analysis of Deviance Table (Type II tests)
##
## Response: (Prev_Tsg)
## LR Chisq Df Pr(>Chisq)
## Country 44.737 14 4.5e-05 ***
## ---
## Signif. codes: 0 '***' 0.001 '**' 0.01 '*' 0.05 '.' 0.1 ' ' 1

#model2 is the best AICc=1210.49
Anova(model2)

## Analysis of Deviance Table (Type II tests)
##
## Response: (Prev_Tsg)
## LR Chisq Df Pr(>Chisq)
## Species 34.871 9 6.28e-05 ***
## ---
## Signif. codes: 0 '***' 0.001 '**' 0.01 '*' 0.05 '.' 0.1 ' ' 1

#-------------------------------------------------------------------------
#TcTv selection model
model1<-glm((Prev_TcTv) ~ Country,data=data, family=gaussian())
model2<-glm((Prev_TcTv) ~ Species,data=data, family=gaussian())
model3<-glm((Prev_TcTv) ~ Country*Species,data=data, family=gaussian())
model4<-glm((Prev_TcTv) ~ Country+Species,data=data, family=gaussian())
model5<-glm((Prev_TcTv) ~ Country*Species+Localisation,data=data, family=gaussian())
model6<-glm((Prev_TcTv) ~ Country+Species+Localisation,data=data, family=gaussian())

#AICc(model1, model2, model3, model4)
model.set <- list(model1, model2, model3, model4, model5, model6)
model.names <- c("model1", "model2","model3", "model4", "model5", "model6")

aictab(model.set, modnames = model.names)

##
## Model selection based on AICc:
##
## K AICc Delta_AICc AICcWt Cum.Wt LL
## model1 16 487.19 0.00 0.71 0.71 -225.64
## model2 11 489.12 1.93 0.27 0.98 -232.64
## model4 23 494.45 7.26 0.02 1.00 -220.04
## model3 27 502.03 14.84 0.00 1.00 -218.11
## model6 100 763.59 276.41 0.00 1.00 -98.16
## model5 103 814.32 327.13 0.00 1.00 -98.16

summary(model1)

##
## Call:
## glm(formula = (Prev_TcTv) ~ Country, family = gaussian(), data = data)
##
## Deviance Residuals:
## Min 1Q Median 3Q Max
## -2.0450 -0.2163 0.0000 0.0000 7.9550
##
## Coefficients:
## Estimate Std. Error t value Pr(>|t|)
## (Intercept) 5.955e-15 3.419e-01 0.000 1.000
## CountryZAM -1.108e-14 1.134e+00 0.000 1.000
## CountrySAF 2.362e-01 5.128e-01 0.461 0.646
## CountryUGA -5.150e-15 5.922e-01 0.000 1.000
## CountryURT -2.163e-14 5.583e-01 0.000 1.000
## CountrySWA -1.589e-14 1.134e+00 0.000 1.000
## CountrySEN -5.951e-15 4.414e-01 0.000 1.000
## CountryZAI -1.082e-14 1.134e+00 0.000 1.000
## CountryMOZ -1.477e-14 8.374e-01 0.000 1.000
## CountryMLI -5.405e-15 4.264e-01 0.000 1.000
## CountryKEN 2.045e+00 4.629e-01 4.418 1.97e-05 ***
## CountryETH -6.762e-15 1.134e+00 0.000 1.000
## CountryGUI -5.751e-15 4.414e-01 0.000 1.000
## CountryGHA -5.573e-15 4.264e-01 0.000 1.000
## CountryBKF 2.163e-01 3.796e-01 0.570 0.570
## ---
## Signif. codes: 0 '***' 0.001 '**' 0.01 '*' 0.05 '.' 0.1 ' ' 1
##
## (Dispersion parameter for gaussian family taken to be 1.168838)
##
## Null deviance: 209.26 on 155 degrees of freedom
## Residual deviance: 164.81 on 141 degrees of freedom
## AIC: 483.28
##
## Number of Fisher Scoring iterations: 2

Anova(model1)

## Analysis of Deviance Table (Type II tests)
##
## Response: (Prev_TcTv)
## LR Chisq Df Pr(>Chisq)
## Country 38.037 14 0.000513 ***
## ---
## Signif. codes: 0 '***' 0.001 '**' 0.01 '*' 0.05 '.' 0.1 ' ' 1

#model1 is the best AICc= 489.05
Anova(model2)

## Analysis of Deviance Table (Type II tests)
##
## Response: (Prev_TcTv)
## LR Chisq Df Pr(>Chisq)
## Species 23.46 9 0.005242 **
## ---
## Signif. codes: 0 '***' 0.001 '**' 0.01 '*' 0.05 '.' 0.1 ' ' 1

#-------------------------------------------------------------------------
#TcTz selection model
model1<-glm((Prev_TcTz) ~ Country,data=data, family=gaussian())
model2<-glm((Prev_TcTz) ~ Species,data=data, family=gaussian())
model3<-glm((Prev_TcTz) ~ Country*Species,data=data, family=gaussian())
model4<-glm((Prev_TcTz) ~ Country+Species,data=data, family=gaussian())
model5<-glm((Prev_TcTz) ~ Country*Species+Localisation,data=data, family=gaussian())
model6<-glm((Prev_TcTz) ~ Country+Species+Localisation,data=data, family=gaussian())

#AICc(model1, model2, model3, model4)
model.set <- list(model1, model2, model3, model4, model5, model6)
model.names <- c("model1", "model2","model3", "model4", "model5", "model6")

aictab(model.set, modnames = model.names)

##
## Model selection based on AICc:
##
## K AICc Delta_AICc AICcWt Cum.Wt LL
## model2 11 766.95 0.00 0.88 0.88 -371.56
## model1 16 770.90 3.96 0.12 1.00 -367.49
## model4 23 787.67 20.72 0.00 1.00 -366.65
## model3 27 799.03 32.08 0.00 1.00 -366.61
## model6 100 799.64 32.70 0.00 1.00 -116.19
## model5 103 847.28 80.33 0.00 1.00 -114.64

summary(model1)

##
## Call:
## glm(formula = (Prev_TcTz) ~ Country, family = gaussian(), data = data)
##
## Deviance Residuals:
## Min 1Q Median 3Q Max
## -3.7894 -0.3586 0.0000 0.0000 18.4306
##
## Coefficients:
## Estimate Std. Error t value Pr(>|t|)
## (Intercept) 2.194e-15 8.488e-01 0.000 1.000000
## CountryZAM -5.394e-15 2.815e+00 0.000 1.000000
## CountrySAF -3.226e-16 1.273e+00 0.000 1.000000
## CountryUGA -2.595e-15 1.470e+00 0.000 1.000000
## CountryURT 2.350e-01 1.386e+00 0.170 0.865610
## CountrySWA -5.910e-15 2.815e+00 0.000 1.000000
## CountrySEN -3.719e-15 1.096e+00 0.000 1.000000
## CountryZAI 1.144e-16 2.815e+00 0.000 1.000000
## CountryMOZ 4.144e-15 2.079e+00 0.000 1.000000
## CountryMLI -5.334e-16 1.059e+00 0.000 1.000000
## CountryKEN 3.342e-01 1.149e+00 0.291 0.771656
## CountryETH -2.672e-15 2.815e+00 0.000 1.000000
## CountryGUI -3.155e-15 1.096e+00 0.000 1.000000
## CountryGHA 3.789e+00 1.059e+00 3.580 0.000472 ***
## CountryBKF 3.586e-01 9.423e-01 0.381 0.704107
## ---
## Signif. codes: 0 '***' 0.001 '**' 0.01 '*' 0.05 '.' 0.1 ' ' 1
##
## (Dispersion parameter for gaussian family taken to be 7.204325)
##
## Null deviance: 1230.7 on 155 degrees of freedom
## Residual deviance: 1015.8 on 141 degrees of freedom
## AIC: 766.99
##
## Number of Fisher Scoring iterations: 2

Anova(model1)

## Analysis of Deviance Table (Type II tests)
##
## Response: (Prev_TcTz)
## LR Chisq Df Pr(>Chisq)
## Country 29.822 14 0.008075 **
## ---
## Signif. codes: 0 '***' 0.001 '**' 0.01 '*' 0.05 '.' 0.1 ' ' 1

#model2 is the best AICc= 770.69
Anova(model2)

## Analysis of Deviance Table (Type II tests)
##
## Response: (Prev_TcTz)
## LR Chisq Df Pr(>Chisq)
## Species 21.903 9 0.009192 **
## ---
## Signif. codes: 0 '***' 0.001 '**' 0.01 '*' 0.05 '.' 0.1 ' ' 1

#-------------------------------------------------------------------------
#TcTsg selection model
model1<-glm((Prev_TcTsg) ~ Country,data=data, family=gaussian())
model2<-glm((Prev_TcTsg) ~ Species,data=data, family=gaussian())
model3<-glm((Prev_TcTsg) ~ Country*Species,data=data, family=gaussian())
model4<-glm((Prev_TcTsg) ~ Country+Species,data=data, family=gaussian())
model5<-glm((Prev_TcTsg) ~ Country*Species+Localisation,data=data, family=gaussian())
model6<-glm((Prev_TcTsg) ~ Country+Species+Localisation,data=data, family=gaussian())

#AICc(model1, model2, model3, model4)
model.set <- list(model1, model2, model3, model4, model5, model6)
model.names <- c("model1", "model2","model3", "model4", "model5", "model6")

aictab(model.set, modnames = model.names)

##
## Model selection based on AICc:
##
## K AICc Delta_AICc AICcWt Cum.Wt LL
## model4 23 741.85 0.00 0.46 0.46 -343.74
## model5 103 742.24 0.39 0.38 0.85 -62.12
## model3 27 744.18 2.34 0.14 0.99 -339.19
## model2 11 749.43 7.59 0.01 1.00 -362.80
## model1 16 757.86 16.01 0.00 1.00 -360.97
## model6 100 949.58 207.73 0.00 1.00 -191.15

summary(model1)

##
## Call:
## glm(formula = (Prev_TcTsg) ~ Country, family = gaussian(), data = data)
##
## Deviance Residuals:
## Min 1Q Median 3Q Max
## -4.6633 -0.1012 0.0000 0.0000 16.4667
##
## Coefficients:
## Estimate Std. Error t value Pr(>|t|)
## (Intercept) 1.6800 0.8140 2.064 0.0409 *
## CountryZAM 5.8500 2.6998 2.167 0.0319 *
## CountrySAF -1.2250 1.2210 -1.003 0.3175
## CountryUGA -1.4680 1.4099 -1.041 0.2996
## CountryURT 2.9833 1.3293 2.244 0.0264 *
## CountrySWA -1.6800 2.6998 -0.622 0.5348
## CountrySEN -1.6800 1.0509 -1.599 0.1121
## CountryZAI -1.6800 2.6998 -0.622 0.5348
## CountryMOZ -1.6800 1.9939 -0.843 0.4009
## CountryMLI -1.6800 1.0153 -1.655 0.1002
## CountryKEN 2.7083 1.1022 2.457 0.0152 *
## CountryETH -1.0300 2.6998 -0.382 0.7034
## CountryGUI -1.6800 1.0509 -1.599 0.1121
## CountryGHA -1.6800 1.0153 -1.655 0.1002
## CountryBKF -1.5788 0.9037 -1.747 0.0828 .
## ---
## Signif. codes: 0 '***' 0.001 '**' 0.01 '*' 0.05 '.' 0.1 ' ' 1
##
## (Dispersion parameter for gaussian family taken to be 6.626342)
##
## Null deviance: 1299.26 on 155 degrees of freedom
## Residual deviance: 934.31 on 141 degrees of freedom
## AIC: 753.94
##
## Number of Fisher Scoring iterations: 2

Anova(model1)

## Analysis of Deviance Table (Type II tests)
##
## Response: (Prev_TcTsg)
## LR Chisq Df Pr(>Chisq)
## Country 55.075 14 8.404e-07 ***
## ---
## Signif. codes: 0 '***' 0.001 '**' 0.01 '*' 0.05 '.' 0.1 ' ' 1

#Model3 is the best AICc = 750.40
Anova(model2)

## Analysis of Deviance Table (Type II tests)
##
## Response: (Prev_TcTsg)
## LR Chisq Df Pr(>Chisq)
## Species 52.321 9 3.93e-08 ***
## ---
## Signif. codes: 0 '***' 0.001 '**' 0.01 '*' 0.05 '.' 0.1 ' ' 1

#-------------------------------------------------------------------------
#TvTz selection model
model1<-glm((Prev_TvTz) ~ Country,data=data, family=gaussian())
model2<-glm((Prev_TvTz) ~ Species,data=data, family=gaussian())
model3<-glm((Prev_TvTz) ~ Country*Species,data=data, family=gaussian())
model4<-glm((Prev_TvTz) ~ Country+Species,data=data, family=gaussian())
model5<-glm((Prev_TvTz) ~ Country*Species+Localisation,data=data, family=gaussian())
model6<-glm((Prev_TvTz) ~ Country+Species+Localisation,data=data, family=gaussian())

#AICc(model1, model2, model3, model4)
model.set <- list(model1, model2, model3, model4, model5, model6)
model.names <- c("model1", "model2","model3", "model4", "model5", "model6")

aictab(model.set, modnames = model.names)

##
## Model selection based on AICc:
##
## K AICc Delta_AICc AICcWt Cum.Wt LL
## model1 16 1143.40 0.00 0.66 0.66 -553.74
## model2 11 1144.76 1.36 0.34 1.00 -560.46
## model4 23 1161.80 18.40 0.00 1.00 -553.72
## model3 27 1173.25 29.84 0.00 1.00 -553.72
## model6 100 1571.22 427.82 0.00 1.00 -501.98
## model5 103 1621.93 478.53 0.00 1.00 -501.96

summary(model1)

##
## Call:
## glm(formula = (Prev_TvTz) ~ Country, family = gaussian(), data = data)
##
## Deviance Residuals:
## Min 1Q Median 3Q Max
## -13.394 -0.480 -0.086 0.000 69.936
##
## Coefficients:
## Estimate Std. Error t value Pr(>|t|)
## (Intercept) -3.951e-16 2.801e+00 0.000 1.000000
## CountryZAM -6.294e-15 9.290e+00 0.000 1.000000
## CountrySAF -5.800e-16 4.201e+00 0.000 1.000000
## CountryUGA 1.167e-15 4.851e+00 0.000 1.000000
## CountryURT 2.350e-01 4.574e+00 0.051 0.959097
## CountrySWA 1.059e-15 9.290e+00 0.000 1.000000
## CountrySEN 1.513e+00 3.616e+00 0.419 0.676212
## CountryZAI -5.622e-15 9.290e+00 0.000 1.000000
## CountryMOZ 4.382e-15 6.861e+00 0.000 1.000000
## CountryMLI -1.316e-16 3.493e+00 0.000 1.000000
## CountryKEN 8.583e-02 3.793e+00 0.023 0.981976
## CountryETH -8.040e-15 9.290e+00 0.000 1.000000
## CountryGUI 0.000e+00 3.616e+00 0.000 1.000000
## CountryGHA 1.339e+01 3.493e+00 3.834 0.000189 ***
## CountryBKF 4.800e-01 3.110e+00 0.154 0.877548
## ---
## Signif. codes: 0 '***' 0.001 '**' 0.01 '*' 0.05 '.' 0.1 ' ' 1
##
## (Dispersion parameter for gaussian family taken to be 78.45348)
##
## Null deviance: 13808 on 155 degrees of freedom
## Residual deviance: 11062 on 141 degrees of freedom
## AIC: 1139.5
##
## Number of Fisher Scoring iterations: 2

Anova(model1)

## Analysis of Deviance Table (Type II tests)
##
## Response: (Prev_TvTz)
## LR Chisq Df Pr(>Chisq)
## Country 35.005 14 0.001467 **
## ---
## Signif. codes: 0 '***' 0.001 '**' 0.01 '*' 0.05 '.' 0.1 ' ' 1

#model1 is the best AICc = 1149.47
Anova(model2)

## Analysis of Deviance Table (Type II tests)
##
## Response: (Prev_TvTz)
## LR Chisq Df Pr(>Chisq)
## Species 21.204 9 0.01177 *
## ---
## Signif. codes: 0 '***' 0.001 '**' 0.01 '*' 0.05 '.' 0.1 ' ' 1

#---------------------------------------------------------------------------
#TvTsg selection model
model1<-glm((Prev_TvTsg) ~ Country,data=data, family=gaussian())
model2<-glm((Prev_TvTsg) ~ Species,data=data, family=gaussian())
model3<-glm((Prev_TvTsg) ~ Country*Species,data=data, family=gaussian())
model4<-glm((Prev_TvTsg) ~ Country+Species,data=data, family=gaussian())
model5<-glm((Prev_TvTsg) ~ Country*Species+Localisation,data=data, family=gaussian())
model6<-glm((Prev_TvTsg) ~ Country+Species+Localisation,data=data, family=gaussian())

#AICc(model1, model2, model3, model4)
model.set <- list(model1, model2, model3, model4, model5, model6)
model.names <- c("model1", "model2","model3", "model4", "model5", "model6")

aictab(model.set, modnames = model.names)

##
## Model selection based on AICc:
##
## K AICc Delta_AICc AICcWt Cum.Wt LL
## model4 23 1083.12 0.00 0.97 0.97 -514.38
## model1 16 1090.71 7.59 0.02 0.99 -527.40
## model2 11 1093.22 10.10 0.01 1.00 -534.69
## model3 27 1094.08 10.96 0.00 1.00 -514.14
## model6 100 1402.52 319.40 0.00 1.00 -417.62
## model5 103 1451.91 368.79 0.00 1.00 -416.95

summary(model1)

##
## Call:
## glm(formula = (Prev_TvTsg) ~ Country, family = gaussian(), data = data)
##
## Deviance Residuals:
## Min 1Q Median 3Q Max
## -6.536 -0.104 0.000 0.000 60.134
##
## Coefficients:
## Estimate Std. Error t value Pr(>|t|)
## (Intercept) -2.773e-15 2.366e+00 0.000 1.000
## CountryZAM -6.818e-14 7.846e+00 0.000 1.000
## CountrySAF -1.283e-14 3.548e+00 0.000 1.000
## CountryUGA -7.956e-16 4.097e+00 0.000 1.000
## CountryURT 1.142e+00 3.863e+00 0.296 0.768
## CountrySWA 7.575e-15 7.846e+00 0.000 1.000
## CountrySEN 2.589e-15 3.054e+00 0.000 1.000
## CountryZAI -2.430e-14 7.846e+00 0.000 1.000
## CountryMOZ 1.000e+00 5.795e+00 0.173 0.863
## CountryMLI 1.225e-14 2.951e+00 0.000 1.000
## CountryKEN 1.042e-01 3.203e+00 0.033 0.974
## CountryETH 4.400e-01 7.846e+00 0.056 0.955
## CountryGUI -3.846e-15 3.054e+00 0.000 1.000
## CountryGHA 8.723e-15 2.951e+00 0.000 1.000
## CountryBKF 6.536e+00 2.626e+00 2.489 0.014 *
## ---
## Signif. codes: 0 '***' 0.001 '**' 0.01 '*' 0.05 '.' 0.1 ' ' 1
##
## (Dispersion parameter for gaussian family taken to be 55.96374)
##
## Null deviance: 9193.0 on 155 degrees of freedom
## Residual deviance: 7890.9 on 141 degrees of freedom
## AIC: 1086.8
##
## Number of Fisher Scoring iterations: 2

Anova(model1)

## Analysis of Deviance Table (Type II tests)
##
## Response: (Prev_TvTsg)
## LR Chisq Df Pr(>Chisq)
## Country 23.266 14 0.05607 .
## ---
## Signif. codes: 0 '***' 0.001 '**' 0.01 '*' 0.05 '.' 0.1 ' ' 1

#model4 is the best AICc = 1088.66
Anova(model2)

## Analysis of Deviance Table (Type II tests)
##
## Response: (Prev_TvTsg)
## LR Chisq Df Pr(>Chisq)
## Species 8.9004 9 0.4465

#----------------------------------------------------------------------------

#TzTsg selection model
model1<-glm((Prev_TzTsg) ~ Country,data=data, family=gaussian())
model2<-glm((Prev_TzTsg) ~ Species,data=data, family=gaussian())
model3<-glm((Prev_TzTsg) ~ Country*Species,data=data, family=gaussian())
model4<-glm((Prev_TzTsg) ~ Country+Species,data=data, family=gaussian())
model5<-glm((Prev_TzTsg) ~ Country*Species+Localisation,data=data, family=gaussian())
model6<-glm((Prev_TzTsg) ~ Country+Species+Localisation,data=data, family=gaussian())

#AICc(model1, model2, model3, model4)
model.set <- list(model1, model2, model3, model4, model5, model6)
model.names <- c("model1", "model2","model3", "model4", "model5", "model6")

aictab(model.set, modnames = model.names)

##
## Model selection based on AICc:
##
## K AICc Delta_AICc AICcWt Cum.Wt LL
## model2 11 881.89 0.00 0.98 0.98 -429.03
## model1 16 889.56 7.68 0.02 1.00 -426.82
## model4 23 900.88 18.99 0.00 1.00 -423.26
## model3 27 912.31 30.42 0.00 1.00 -423.25
## model6 100 1322.73 440.84 0.00 1.00 -377.73
## model5 103 1373.45 491.57 0.00 1.00 -377.73

summary(model1)

##
## Call:
## glm(formula = (Prev_TzTsg) ~ Country, family = gaussian(), data = data)
##
## Deviance Residuals:
## Min 1Q Median 3Q Max
## -1.8402 -0.8751 0.0000 0.0000 31.4898
##
## Coefficients:
## Estimate Std. Error t value Pr(>|t|)
## (Intercept) -2.222e-15 1.242e+00 0.000 1.000
## CountryZAM -1.814e-14 4.118e+00 0.000 1.000
## CountrySAF -1.850e-15 1.862e+00 0.000 1.000
## CountryUGA 1.740e-15 2.150e+00 0.000 1.000
## CountryURT 5.533e-01 2.027e+00 0.273 0.785
## CountrySWA 1.445e-15 4.118e+00 0.000 1.000
## CountrySEN 1.765e-15 1.603e+00 0.000 1.000
## CountryZAI -6.094e-15 4.118e+00 0.000 1.000
## CountryMOZ 1.689e-15 3.041e+00 0.000 1.000
## CountryMLI 5.128e-15 1.549e+00 0.000 1.000
## CountryKEN 2.750e-01 1.681e+00 0.164 0.870
## CountryETH 6.500e-01 4.118e+00 0.158 0.875
## CountryGUI 7.305e-16 1.603e+00 0.000 1.000
## CountryGHA 3.877e-15 1.549e+00 0.000 1.000
## CountryBKF 1.840e+00 1.378e+00 1.335 0.184
##
## (Dispersion parameter for gaussian family taken to be 15.41486)
##
## Null deviance: 2274.4 on 155 degrees of freedom
## Residual deviance: 2173.5 on 141 degrees of freedom
## AIC: 885.65
##
## Number of Fisher Scoring iterations: 2

Anova(model1)

## Analysis of Deviance Table (Type II tests)
##
## Response: (Prev_TzTsg)
## LR Chisq Df Pr(>Chisq)
## Country 6.5477 14 0.9507

#model2 is the best AICc = 886.37
Anova(model2)

## Analysis of Deviance Table (Type II tests)
##
## Response: (Prev_TzTsg)
## LR Chisq Df Pr(>Chisq)
## Species 2.5265 9 0.9802

#----------------------------------------------------------------------------

#TcTvTz selection model
model1<-glm((Prev_TcTvTz) ~ Country,data=data, family=gaussian())
model2<-glm((Prev_TcTvTz) ~ Species,data=data, family=gaussian())
model3<-glm((Prev_TcTvTz) ~ Country*Species,data=data, family=gaussian())
model4<-glm((Prev_TcTvTz) ~ Country+Species,data=data, family=gaussian())
model5<-glm((Prev_TcTvTz) ~ Country*Species+Localisation,data=data, family=gaussian())
model6<-glm((Prev_TcTvTz) ~ Country+Species+Localisation,data=data, family=gaussian())

#AICc(model1, model2, model3, model4)
model.set <- list(model1, model2, model3, model4, model5, model6)
model.names <- c("model1", "model2","model3", "model4", "model5", "model6")

aictab(model.set, modnames = model.names)

##
## Model selection based on AICc:
##
## K AICc Delta_AICc AICcWt Cum.Wt LL
## model2 11 265.19 0.00 1 1 -120.68
## model4 23 292.69 27.51 0 1 -119.17
## model3 27 304.14 38.96 0 1 -119.17
## model1 16 307.67 42.49 0 1 -135.88
## model6 100 672.31 407.12 0 1 -52.52
## model5 103 723.04 457.85 0 1 -52.52

summary(model1)

##
## Call:
## glm(formula = (Prev_TcTvTz) ~ Country, family = gaussian(), data = data)
##
## Deviance Residuals:
## Min 1Q Median 3Q Max
## -0.3856 -0.1549 0.0000 0.0000 5.2744
##
## Coefficients:
## Estimate Std. Error t value Pr(>|t|)
## (Intercept) 1.150e-17 1.923e-01 0.000 1.000
## CountryZAM -1.619e-15 6.378e-01 0.000 1.000
## CountrySAF -6.904e-16 2.885e-01 0.000 1.000
## CountryUGA -3.656e-16 3.331e-01 0.000 1.000
## CountryURT 2.697e-16 3.140e-01 0.000 1.000
## CountrySWA -1.530e-16 6.378e-01 0.000 1.000
## CountrySEN 1.372e-16 2.483e-01 0.000 1.000
## CountryZAI -7.134e-16 6.378e-01 0.000 1.000
## CountryMOZ -3.098e-16 4.711e-01 0.000 1.000
## CountryMLI 3.191e-16 2.398e-01 0.000 1.000
## CountryKEN 2.307e-16 2.604e-01 0.000 1.000
## CountryETH -9.883e-16 6.378e-01 0.000 1.000
## CountryGUI 1.577e-17 2.483e-01 0.000 1.000
## CountryGHA 3.856e-01 2.398e-01 1.607 0.110
## CountryBKF 1.549e-01 2.135e-01 0.725 0.469
##
## (Dispersion parameter for gaussian family taken to be 0.3698193)
##
## Null deviance: 54.666 on 155 degrees of freedom
## Residual deviance: 52.145 on 141 degrees of freedom
## AIC: 303.76
##
## Number of Fisher Scoring iterations: 2

Anova(model1)

## Analysis of Deviance Table (Type II tests)
##
## Response: (Prev_TcTvTz)
## LR Chisq Df Pr(>Chisq)
## Country 6.8186 14 0.9415

#model2 is the best AICc = 265.72
Anova(model2)

## Analysis of Deviance Table (Type II tests)
##
## Response: (Prev_TcTvTz)
## LR Chisq Df Pr(>Chisq)
## Species 39.998 9 7.605e-06 ***
## ---
## Signif. codes: 0 '***' 0.001 '**' 0.01 '*' 0.05 '.' 0.1 ' ' 1

## Statistics for Supplementary table 3

#======== Glm Tc per country
data$Country <- relevel(data$Country, ref= "BKF")
model1<-glm((Prev_Tc) ~ Country,data=data, family=gaussian())
summary(model1)

##
## Call:
## glm(formula = (Prev_Tc) ~ Country, family = gaussian(), data = data)
##
## Deviance Residuals:
## Min 1Q Median 3Q Max
## -13.594 -3.404 -0.107 0.000 46.596
##
## Coefficients:
## Estimate Std. Error t value Pr(>|t|)
## (Intercept) 3.4037 1.1110 3.064 0.00262 **
## CountryZIM 1.3603 2.5578 0.532 0.59568
## CountryZAM -2.0337 7.3697 -0.276 0.78298
## CountrySAF 1.4863 2.8052 0.530 0.59706
## CountryUGA -0.8017 3.4424 -0.233 0.81618
## CountryURT 6.3429 3.1750 1.998 0.04766 *
## CountrySWA -3.4037 7.3697 -0.462 0.64490
## CountrySEN -3.3031 2.1847 -1.512 0.13279
## CountryZAI -3.4037 7.3697 -0.462 0.64490
## CountryMOZ -0.4037 5.2700 -0.077 0.93904
## CountryMLI -3.2971 2.0453 -1.612 0.10919
## CountryKEN 11.2504 2.3785 4.730 5.39e-06 ***
## CountryETH 2.6963 7.3697 0.366 0.71502
## CountryGUI -3.4037 2.1847 -1.558 0.12148
## CountryGHA -3.0848 2.0453 -1.508 0.13372
## ---
## Signif. codes: 0 '***' 0.001 '**' 0.01 '*' 0.05 '.' 0.1 ' ' 1
##
## (Dispersion parameter for gaussian family taken to be 53.07752)
##
## Null deviance: 10017.9 on 155 degrees of freedom
## Residual deviance: 7483.9 on 141 degrees of freedom
## AIC: 1078.5
##
## Number of Fisher Scoring iterations: 2

data$Country <- relevel(data$Country, ref= "GHA")
model1<-glm((Prev_Tc) ~ Country,data=data, family=gaussian())
summary(model1)

##
## Call:
## glm(formula = (Prev_Tc) ~ Country, family = gaussian(), data = data)
##
## Deviance Residuals:
## Min 1Q Median 3Q Max
## -13.594 -3.404 -0.107 0.000 46.596
##
## Coefficients:
## Estimate Std. Error t value Pr(>|t|)
## (Intercept) 0.3189 1.7172 0.186 0.85294
## CountryBKF 3.0848 2.0453 1.508 0.13372
## CountryZIM 4.4451 2.8734 1.547 0.12411
## CountryZAM 1.0511 7.4851 0.140 0.88852
## CountrySAF 4.5711 3.0957 1.477 0.14201
## CountryUGA 2.2831 3.6830 0.620 0.53632
## CountryURT 9.4278 3.4344 2.745 0.00684 **
## CountrySWA -0.3189 7.4851 -0.043 0.96608
## CountrySEN -0.2182 2.5470 -0.086 0.93184
## CountryZAI -0.3189 7.4851 -0.043 0.96608
## CountryMOZ 2.6811 5.4302 0.494 0.62226
## CountryMLI -0.2122 2.4285 -0.087 0.93049
## CountryKEN 14.3353 2.7151 5.280 4.79e-07 ***
## CountryETH 5.7811 7.4851 0.772 0.44120
## CountryGUI -0.3189 2.5470 -0.125 0.90054
## ---
## Signif. codes: 0 '***' 0.001 '**' 0.01 '*' 0.05 '.' 0.1 ' ' 1
##
## (Dispersion parameter for gaussian family taken to be 53.07752)
##
## Null deviance: 10017.9 on 155 degrees of freedom
## Residual deviance: 7483.9 on 141 degrees of freedom
## AIC: 1078.5
##
## Number of Fisher Scoring iterations: 2

data$Country <- relevel(data$Country, ref= "GUI")
model1<-glm((Prev_Tc) ~ Country,data=data, family=gaussian())
summary(model1)

##
## Call:
## glm(formula = (Prev_Tc) ~ Country, family = gaussian(), data = data)
##
## Deviance Residuals:
## Min 1Q Median 3Q Max
## -13.594 -3.404 -0.107 0.000 46.596
##
## Coefficients:
## Estimate Std. Error t value Pr(>|t|)
## (Intercept) 1.204e-14 1.881e+00 0.000 1.00000
## CountryGHA 3.189e-01 2.547e+00 0.125 0.90054
## CountryBKF 3.404e+00 2.185e+00 1.558 0.12148
## CountryZIM 4.764e+00 2.974e+00 1.602 0.11145
## CountryZAM 1.370e+00 7.524e+00 0.182 0.85579
## CountrySAF 4.890e+00 3.190e+00 1.533 0.12748
## CountryUGA 2.602e+00 3.762e+00 0.692 0.49031
## CountryURT 9.747e+00 3.519e+00 2.770 0.00637 **
## CountrySWA 5.479e-15 7.524e+00 0.000 1.00000
## CountrySEN 1.007e-01 2.660e+00 0.038 0.96987
## CountryZAI -3.096e-14 7.524e+00 0.000 1.00000
## CountryMOZ 3.000e+00 5.484e+00 0.547 0.58523
## CountryMLI 1.067e-01 2.547e+00 0.042 0.96665
## CountryKEN 1.465e+01 2.822e+00 5.194 7.08e-07 ***
## CountryETH 6.100e+00 7.524e+00 0.811 0.41890
## ---
## Signif. codes: 0 '***' 0.001 '**' 0.01 '*' 0.05 '.' 0.1 ' ' 1
##
## (Dispersion parameter for gaussian family taken to be 53.07752)
##
## Null deviance: 10017.9 on 155 degrees of freedom
## Residual deviance: 7483.9 on 141 degrees of freedom
## AIC: 1078.5
##
## Number of Fisher Scoring iterations: 2

data$Country <- relevel(data$Country, ref= "ETH")
model1<-glm((Prev_Tc) ~ Country,data=data, family=gaussian())
summary(model1)

##
## Call:
## glm(formula = (Prev_Tc) ~ Country, family = gaussian(), data = data)
##
## Deviance Residuals:
## Min 1Q Median 3Q Max
## -13.594 -3.404 -0.107 0.000 46.596
##
## Coefficients:
## Estimate Std. Error t value Pr(>|t|)
## (Intercept) 6.100 7.285 0.837 0.404
## CountryGUI -6.100 7.524 -0.811 0.419
## CountryGHA -5.781 7.485 -0.772 0.441
## CountryBKF -2.696 7.370 -0.366 0.715
## CountryZIM -1.336 7.641 -0.175 0.861
## CountryZAM -4.730 10.303 -0.459 0.647
## CountrySAF -1.210 7.727 -0.157 0.876
## CountryUGA -3.498 7.981 -0.438 0.662
## CountryURT 3.647 7.869 0.463 0.644
## CountrySWA -6.100 10.303 -0.592 0.555
## CountrySEN -5.999 7.524 -0.797 0.427
## CountryZAI -6.100 10.303 -0.592 0.555
## CountryMOZ -3.100 8.923 -0.347 0.729
## CountryMLI -5.993 7.485 -0.801 0.425
## CountryKEN 8.554 7.583 1.128 0.261
##
## (Dispersion parameter for gaussian family taken to be 53.07752)
##
## Null deviance: 10017.9 on 155 degrees of freedom
## Residual deviance: 7483.9 on 141 degrees of freedom
## AIC: 1078.5
##
## Number of Fisher Scoring iterations: 2

data$Country <- relevel(data$Country, ref= "KEN")
model1<-glm((Prev_Tc) ~ Country,data=data, family=gaussian())
summary(model1)

##
## Call:
## glm(formula = (Prev_Tc) ~ Country, family = gaussian(), data = data)
##
## Deviance Residuals:
## Min 1Q Median 3Q Max
## -13.594 -3.404 -0.107 0.000 46.596
##
## Coefficients:
## Estimate Std. Error t value Pr(>|t|)
## (Intercept) 14.654 2.103 6.968 1.13e-10 ***
## CountryETH -8.554 7.583 -1.128 0.26120
## CountryGUI -14.654 2.822 -5.194 7.08e-07 ***
## CountryGHA -14.335 2.715 -5.280 4.79e-07 ***
## CountryBKF -11.250 2.379 -4.730 5.39e-06 ***
## CountryZIM -9.890 3.119 -3.170 0.00187 **
## CountryZAM -13.284 7.583 -1.752 0.08197 .
## CountrySAF -9.764 3.325 -2.936 0.00388 **
## CountryUGA -12.052 3.878 -3.108 0.00228 **
## CountryURT -4.908 3.643 -1.347 0.18007
## CountrySWA -14.654 7.583 -1.933 0.05530 .
## CountrySEN -14.554 2.822 -5.158 8.31e-07 ***
## CountryZAI -14.654 7.583 -1.933 0.05530 .
## CountryMOZ -11.654 5.564 -2.094 0.03801 *
## CountryMLI -14.547 2.715 -5.358 3.35e-07 ***
## ---
## Signif. codes: 0 '***' 0.001 '**' 0.01 '*' 0.05 '.' 0.1 ' ' 1
##
## (Dispersion parameter for gaussian family taken to be 53.07752)
##
## Null deviance: 10017.9 on 155 degrees of freedom
## Residual deviance: 7483.9 on 141 degrees of freedom
## AIC: 1078.5
##
## Number of Fisher Scoring iterations: 2

data$Country <- relevel(data$Country, ref= "MLI")
model1<-glm((Prev_Tc) ~ Country,data=data, family=gaussian())
summary(model1)

##
## Call:
## glm(formula = (Prev_Tc) ~ Country, family = gaussian(), data = data)
##
## Deviance Residuals:
## Min 1Q Median 3Q Max
## -13.594 -3.404 -0.107 0.000 46.596
##
## Coefficients:
## Estimate Std. Error t value Pr(>|t|)
## (Intercept) 0.1067 1.7172 0.062 0.95056
## CountryKEN 14.5475 2.7151 5.358 3.35e-07 ***
## CountryETH 5.9933 7.4851 0.801 0.42465
## CountryGUI -0.1067 2.5470 -0.042 0.96665
## CountryGHA 0.2122 2.4285 0.087 0.93049
## CountryBKF 3.2971 2.0453 1.612 0.10919
## CountryZIM 4.6573 2.8734 1.621 0.10729
## CountryZAM 1.2633 7.4851 0.169 0.86621
## CountrySAF 4.7833 3.0957 1.545 0.12455
## CountryUGA 2.4953 3.6830 0.678 0.49918
## CountryURT 9.6400 3.4344 2.807 0.00571 **
## CountrySWA -0.1067 7.4851 -0.014 0.98865
## CountrySEN -0.0060 2.5470 -0.002 0.99812
## CountryZAI -0.1067 7.4851 -0.014 0.98865
## CountryMOZ 2.8933 5.4302 0.533 0.59500
## ---
## Signif. codes: 0 '***' 0.001 '**' 0.01 '*' 0.05 '.' 0.1 ' ' 1
##
## (Dispersion parameter for gaussian family taken to be 53.07752)
##
## Null deviance: 10017.9 on 155 degrees of freedom
## Residual deviance: 7483.9 on 141 degrees of freedom
## AIC: 1078.5
##
## Number of Fisher Scoring iterations: 2

data$Country <- relevel(data$Country, ref= "MOZ")
model1<-glm((Prev_Tc) ~ Country,data=data, family=gaussian())
summary(model1)

##
## Call:
## glm(formula = (Prev_Tc) ~ Country, family = gaussian(), data = data)
##
## Deviance Residuals:
## Min 1Q Median 3Q Max
## -13.594 -3.404 -0.107 0.000 46.596
##
## Coefficients:
## Estimate Std. Error t value Pr(>|t|)
## (Intercept) 3.0000 5.1516 0.582 0.561
## CountryMLI -2.8933 5.4302 -0.533 0.595
## CountryKEN 11.6542 5.5643 2.094 0.038 *
## CountryETH 3.1000 8.9228 0.347 0.729
## CountryGUI -3.0000 5.4843 -0.547 0.585
## CountryGHA -2.6811 5.4302 -0.494 0.622
## CountryBKF 0.4037 5.2700 0.077 0.939
## CountryZIM 1.7640 5.6433 0.313 0.755
## CountryZAM -1.6300 8.9228 -0.183 0.855
## CountrySAF 1.8900 5.7596 0.328 0.743
## CountryUGA -0.3980 6.0954 -0.065 0.948
## CountryURT 6.7467 5.9485 1.134 0.259
## CountrySWA -3.0000 8.9228 -0.336 0.737
## CountrySEN -2.8993 5.4843 -0.529 0.598
## CountryZAI -3.0000 8.9228 -0.336 0.737
## ---
## Signif. codes: 0 '***' 0.001 '**' 0.01 '*' 0.05 '.' 0.1 ' ' 1
##
## (Dispersion parameter for gaussian family taken to be 53.07752)
##
## Null deviance: 10017.9 on 155 degrees of freedom
## Residual deviance: 7483.9 on 141 degrees of freedom
## AIC: 1078.5
##
## Number of Fisher Scoring iterations: 2

data$Country <- relevel(data$Country, ref= "ZAI")
model1<-glm((Prev_Tc) ~ Country,data=data, family=gaussian())
summary(model1)

##
## Call:
## glm(formula = (Prev_Tc) ~ Country, family = gaussian(), data = data)
##
## Deviance Residuals:
## Min 1Q Median 3Q Max
## -13.594 -3.404 -0.107 0.000 46.596
##
## Coefficients:
## Estimate Std. Error t value Pr(>|t|)
## (Intercept) -3.752e-14 7.285e+00 0.000 1.0000
## CountryMOZ 3.000e+00 8.923e+00 0.336 0.7372
## CountryMLI 1.067e-01 7.485e+00 0.014 0.9887
## CountryKEN 1.465e+01 7.583e+00 1.933 0.0553 .
## CountryETH 6.100e+00 1.030e+01 0.592 0.5548
## CountryGUI 3.013e-14 7.524e+00 0.000 1.0000
## CountryGHA 3.189e-01 7.485e+00 0.043 0.9661
## CountryBKF 3.404e+00 7.370e+00 0.462 0.6449
## CountryZIM 4.764e+00 7.641e+00 0.623 0.5340
## CountryZAM 1.370e+00 1.030e+01 0.133 0.8944
## CountrySAF 4.890e+00 7.727e+00 0.633 0.5279
## CountryUGA 2.602e+00 7.981e+00 0.326 0.7449
## CountryURT 9.747e+00 7.869e+00 1.239 0.2176
## CountrySWA 3.592e-14 1.030e+01 0.000 1.0000
## CountrySEN 1.007e-01 7.524e+00 0.013 0.9893
## ---
## Signif. codes: 0 '***' 0.001 '**' 0.01 '*' 0.05 '.' 0.1 ' ' 1
##
## (Dispersion parameter for gaussian family taken to be 53.07752)
##
## Null deviance: 10017.9 on 155 degrees of freedom
## Residual deviance: 7483.9 on 141 degrees of freedom
## AIC: 1078.5
##
## Number of Fisher Scoring iterations: 2

data$Country <- relevel(data$Country, ref= "SEN")
model1<-glm((Prev_Tc) ~ Country,data=data, family=gaussian())
summary(model1)

##
## Call:
## glm(formula = (Prev_Tc) ~ Country, family = gaussian(), data = data)
##
## Deviance Residuals:
## Min 1Q Median 3Q Max
## -13.594 -3.404 -0.107 0.000 46.596
##
## Coefficients:
## Estimate Std. Error t value Pr(>|t|)
## (Intercept) 0.1007 1.8811 0.054 0.95740
## CountryZAI -0.1007 7.5244 -0.013 0.98934
## CountryMOZ 2.8993 5.4843 0.529 0.59787
## CountryMLI 0.0060 2.5470 0.002 0.99812
## CountryKEN 14.5535 2.8216 5.158 8.31e-07 ***
## CountryETH 5.9993 7.5244 0.797 0.42661
## CountryGUI -0.1007 2.6603 -0.038 0.96987
## CountryGHA 0.2182 2.5470 0.086 0.93184
## CountryBKF 3.3031 2.1847 1.512 0.13279
## CountryZIM 4.6633 2.9743 1.568 0.11915
## CountryZAM 1.2693 7.5244 0.169 0.86628
## CountrySAF 4.7893 3.1895 1.502 0.13544
## CountryUGA 2.5013 3.7622 0.665 0.50722
## CountryURT 9.6460 3.5192 2.741 0.00692 **
## CountrySWA -0.1007 7.5244 -0.013 0.98934
## ---
## Signif. codes: 0 '***' 0.001 '**' 0.01 '*' 0.05 '.' 0.1 ' ' 1
##
## (Dispersion parameter for gaussian family taken to be 53.07752)
##
## Null deviance: 10017.9 on 155 degrees of freedom
## Residual deviance: 7483.9 on 141 degrees of freedom
## AIC: 1078.5
##
## Number of Fisher Scoring iterations: 2

data$Country <- relevel(data$Country, ref= "SWA")
model1<-glm((Prev_Tc) ~ Country,data=data, family=gaussian())
summary(model1)

##
## Call:
## glm(formula = (Prev_Tc) ~ Country, family = gaussian(), data = data)
##
## Deviance Residuals:
## Min 1Q Median 3Q Max
## -13.594 -3.404 -0.107 0.000 46.596
##
## Coefficients:
## Estimate Std. Error t value Pr(>|t|)
## (Intercept) 2.653e-14 7.285e+00 0.000 1.0000
## CountrySEN 1.007e-01 7.524e+00 0.013 0.9893
## CountryZAI -2.192e-14 1.030e+01 0.000 1.0000
## CountryMOZ 3.000e+00 8.923e+00 0.336 0.7372
## CountryMLI 1.067e-01 7.485e+00 0.014 0.9887
## CountryKEN 1.465e+01 7.583e+00 1.933 0.0553 .
## CountryETH 6.100e+00 1.030e+01 0.592 0.5548
## CountryGUI -2.485e-14 7.524e+00 0.000 1.0000
## CountryGHA 3.189e-01 7.485e+00 0.043 0.9661
## CountryBKF 3.404e+00 7.370e+00 0.462 0.6449
## CountryZIM 4.764e+00 7.641e+00 0.623 0.5340
## CountryZAM 1.370e+00 1.030e+01 0.133 0.8944
## CountrySAF 4.890e+00 7.727e+00 0.633 0.5279
## CountryUGA 2.602e+00 7.981e+00 0.326 0.7449
## CountryURT 9.747e+00 7.869e+00 1.239 0.2176
## ---
## Signif. codes: 0 '***' 0.001 '**' 0.01 '*' 0.05 '.' 0.1 ' ' 1
##
## (Dispersion parameter for gaussian family taken to be 53.07752)
##
## Null deviance: 10017.9 on 155 degrees of freedom
## Residual deviance: 7483.9 on 141 degrees of freedom
## AIC: 1078.5
##
## Number of Fisher Scoring iterations: 2

data$Country <- relevel(data$Country, ref= "URT")
model1<-glm((Prev_Tc) ~ Country,data=data, family=gaussian())
summary(model1)

##
## Call:
## glm(formula = (Prev_Tc) ~ Country, family = gaussian(), data = data)
##
## Deviance Residuals:
## Min 1Q Median 3Q Max
## -13.594 -3.404 -0.107 0.000 46.596
##
## Coefficients:
## Estimate Std. Error t value Pr(>|t|)
## (Intercept) 9.747 2.974 3.277 0.00132 **
## CountrySWA -9.747 7.869 -1.239 0.21756
## CountrySEN -9.646 3.519 -2.741 0.00692 **
## CountryZAI -9.747 7.869 -1.239 0.21756
## CountryMOZ -6.747 5.949 -1.134 0.25865
## CountryMLI -9.640 3.434 -2.807 0.00571 **
## CountryKEN 4.908 3.643 1.347 0.18007
## CountryETH -3.647 7.869 -0.463 0.64378
## CountryGUI -9.747 3.519 -2.770 0.00637 **
## CountryGHA -9.428 3.434 -2.745 0.00684 **
## CountryBKF -6.343 3.175 -1.998 0.04766 *
## CountryZIM -4.983 3.762 -1.324 0.18751
## CountryZAM -8.377 7.869 -1.064 0.28893
## CountrySAF -4.857 3.935 -1.234 0.21912
## CountryUGA -7.145 4.412 -1.620 0.10757
## ---
## Signif. codes: 0 '***' 0.001 '**' 0.01 '*' 0.05 '.' 0.1 ' ' 1
##
## (Dispersion parameter for gaussian family taken to be 53.07752)
##
## Null deviance: 10017.9 on 155 degrees of freedom
## Residual deviance: 7483.9 on 141 degrees of freedom
## AIC: 1078.5
##
## Number of Fisher Scoring iterations: 2

data$Country <- relevel(data$Country, ref= "UGA")
model1<-glm((Prev_Tc) ~ Country,data=data, family=gaussian())
summary(model1)

##
## Call:
## glm(formula = (Prev_Tc) ~ Country, family = gaussian(), data = data)
##
## Deviance Residuals:
## Min 1Q Median 3Q Max
## -13.594 -3.404 -0.107 0.000 46.596
##
## Coefficients:
## Estimate Std. Error t value Pr(>|t|)
## (Intercept) 2.6020 3.2581 0.799 0.42586
## CountryURT 7.1447 4.4115 1.620 0.10757
## CountrySWA -2.6020 7.9808 -0.326 0.74488
## CountrySEN -2.5013 3.7622 -0.665 0.50722
## CountryZAI -2.6020 7.9808 -0.326 0.74488
## CountryMOZ 0.3980 6.0954 0.065 0.94803
## CountryMLI -2.4953 3.6830 -0.678 0.49918
## CountryKEN 12.0522 3.8780 3.108 0.00228 **
## CountryETH 3.4980 7.9808 0.438 0.66184
## CountryGUI -2.6020 3.7622 -0.692 0.49031
## CountryGHA -2.2831 3.6830 -0.620 0.53632
## CountryBKF 0.8017 3.4424 0.233 0.81618
## CountryZIM 2.1620 3.9904 0.542 0.58881
## CountryZAM -1.2320 7.9808 -0.154 0.87754
## CountrySAF 2.2880 4.1533 0.551 0.58259
## ---
## Signif. codes: 0 '***' 0.001 '**' 0.01 '*' 0.05 '.' 0.1 ' ' 1
##
## (Dispersion parameter for gaussian family taken to be 53.07752)
##
## Null deviance: 10017.9 on 155 degrees of freedom
## Residual deviance: 7483.9 on 141 degrees of freedom
## AIC: 1078.5
##
## Number of Fisher Scoring iterations: 2

data$Country <- relevel(data$Country, ref= "SAF")
model1<-glm((Prev_Tc) ~ Country,data=data, family=gaussian())
summary(model1)

##
## Call:
## glm(formula = (Prev_Tc) ~ Country, family = gaussian(), data = data)
##
## Deviance Residuals:
## Min 1Q Median 3Q Max
## -13.594 -3.404 -0.107 0.000 46.596
##
## Coefficients:
## Estimate Std. Error t value Pr(>|t|)
## (Intercept) 4.890 2.576 1.898 0.05968 .
## CountryUGA -2.288 4.153 -0.551 0.58259
## CountryURT 4.857 3.935 1.234 0.21912
## CountrySWA -4.890 7.727 -0.633 0.52788
## CountrySEN -4.789 3.189 -1.502 0.13544
## CountryZAI -4.890 7.727 -0.633 0.52788
## CountryMOZ -1.890 5.760 -0.328 0.74329
## CountryMLI -4.783 3.096 -1.545 0.12455
## CountryKEN 9.764 3.325 2.936 0.00388 **
## CountryETH 1.210 7.727 0.157 0.87579
## CountryGUI -4.890 3.189 -1.533 0.12748
## CountryGHA -4.571 3.096 -1.477 0.14201
## CountryBKF -1.486 2.805 -0.530 0.59706
## CountryZIM -0.126 3.456 -0.036 0.97097
## CountryZAM -3.520 7.727 -0.456 0.64943
## ---
## Signif. codes: 0 '***' 0.001 '**' 0.01 '*' 0.05 '.' 0.1 ' ' 1
##
## (Dispersion parameter for gaussian family taken to be 53.07752)
##
## Null deviance: 10017.9 on 155 degrees of freedom
## Residual deviance: 7483.9 on 141 degrees of freedom
## AIC: 1078.5
##
## Number of Fisher Scoring iterations: 2

data$Country <- relevel(data$Country, ref= "ZAM")
model1<-glm((Prev_Tc) ~ Country,data=data, family=gaussian())
summary(model1)

##
## Call:
## glm(formula = (Prev_Tc) ~ Country, family = gaussian(), data = data)
##
## Deviance Residuals:
## Min 1Q Median 3Q Max
## -13.594 -3.404 -0.107 0.000 46.596
##
## Coefficients:
## Estimate Std. Error t value Pr(>|t|)
## (Intercept) 1.370 7.285 0.188 0.851
## CountrySAF 3.520 7.727 0.456 0.649
## CountryUGA 1.232 7.981 0.154 0.878
## CountryURT 8.377 7.869 1.064 0.289
## CountrySWA -1.370 10.303 -0.133 0.894
## CountrySEN -1.269 7.524 -0.169 0.866
## CountryZAI -1.370 10.303 -0.133 0.894
## CountryMOZ 1.630 8.923 0.183 0.855
## CountryMLI -1.263 7.485 -0.169 0.866
## CountryKEN 13.284 7.583 1.752 0.082 .
## CountryETH 4.730 10.303 0.459 0.647
## CountryGUI -1.370 7.524 -0.182 0.856
## CountryGHA -1.051 7.485 -0.140 0.889
## CountryBKF 2.034 7.370 0.276 0.783
## CountryZIM 3.394 7.641 0.444 0.658
## ---
## Signif. codes: 0 '***' 0.001 '**' 0.01 '*' 0.05 '.' 0.1 ' ' 1
##
## (Dispersion parameter for gaussian family taken to be 53.07752)
##
## Null deviance: 10017.9 on 155 degrees of freedom
## Residual deviance: 7483.9 on 141 degrees of freedom
## AIC: 1078.5
##
## Number of Fisher Scoring iterations: 2

data$Country <- relevel(data$Country, ref= "ZIM")
model1<-glm((Prev_Tc) ~ Country,data=data, family=gaussian())
summary(model1)

##
## Call:
## glm(formula = (Prev_Tc) ~ Country, family = gaussian(), data = data)
##
## Deviance Residuals:
## Min 1Q Median 3Q Max
## -13.594 -3.404 -0.107 0.000 46.596
##
## Coefficients:
## Estimate Std. Error t value Pr(>|t|)
## (Intercept) 4.764 2.304 2.068 0.04048 *
## CountryZAM -3.394 7.641 -0.444 0.65759
## CountrySAF 0.126 3.456 0.036 0.97097
## CountryUGA -2.162 3.990 -0.542 0.58881
## CountryURT 4.983 3.762 1.324 0.18751
## CountrySWA -4.764 7.641 -0.623 0.53398
## CountrySEN -4.663 2.974 -1.568 0.11915
## CountryZAI -4.764 7.641 -0.623 0.53398
## CountryMOZ -1.764 5.643 -0.313 0.75506
## CountryMLI -4.657 2.873 -1.621 0.10729
## CountryKEN 9.890 3.119 3.170 0.00187 **
## CountryETH 1.336 7.641 0.175 0.86145
## CountryGUI -4.764 2.974 -1.602 0.11145
## CountryGHA -4.445 2.873 -1.547 0.12411
## CountryBKF -1.360 2.558 -0.532 0.59568
## ---
## Signif. codes: 0 '***' 0.001 '**' 0.01 '*' 0.05 '.' 0.1 ' ' 1
##
## (Dispersion parameter for gaussian family taken to be 53.07752)
##
## Null deviance: 10017.9 on 155 degrees of freedom
## Residual deviance: 7483.9 on 141 degrees of freedom
## AIC: 1078.5
##
## Number of Fisher Scoring iterations: 2

#======== Glm Tv per country
data$Country <- relevel(data$Country, ref= "BKF")
model1<-glm((Prev_Tv) ~ Country,data=data, family=gaussian())
summary(model1)

##
## Call:
## glm(formula = (Prev_Tv) ~ Country, family = gaussian(), data = data)
##
## Deviance Residuals:
## Min 1Q Median 3Q Max
## -22.393 -9.770 -1.427 3.072 77.607
##
## Coefficients:
## Estimate Std. Error t value Pr(>|t|)
## (Intercept) 15.177 2.642 5.744 5.46e-08 ***
## CountryZIM -14.621 6.082 -2.404 0.0175 *
## CountryZAM -14.497 17.525 -0.827 0.4095
## CountrySAF -14.274 6.671 -2.140 0.0341 *
## CountryUGA -14.751 8.186 -1.802 0.0737 .
## CountryURT -13.403 7.550 -1.775 0.0780 .
## CountrySWA -15.177 17.525 -0.866 0.3880
## CountrySEN 7.216 5.195 1.389 0.1670
## CountryZAI -12.317 17.525 -0.703 0.4834
## CountryMOZ -14.177 12.532 -1.131 0.2599
## CountryMLI -5.407 4.864 -1.112 0.2682
## CountryKEN -10.357 5.656 -1.831 0.0692 .
## CountryETH -14.527 17.525 -0.829 0.4086
## CountryGUI -12.203 5.195 -2.349 0.0202 *
## CountryGHA 1.535 4.864 0.316 0.7528
## ---
## Signif. codes: 0 '***' 0.001 '**' 0.01 '*' 0.05 '.' 0.1 ' ' 1
##
## (Dispersion parameter for gaussian family taken to be 300.1614)
##
## Null deviance: 50549 on 155 degrees of freedom
## Residual deviance: 42323 on 141 degrees of freedom
## AIC: 1348.8
##
## Number of Fisher Scoring iterations: 2

data$Country <- relevel(data$Country, ref= "GHA")
model1<-glm((Prev_Tv) ~ Country,data=data, family=gaussian())
summary(model1)

##
## Call:
## glm(formula = (Prev_Tv) ~ Country, family = gaussian(), data = data)
##
## Deviance Residuals:
## Min 1Q Median 3Q Max
## -22.393 -9.770 -1.427 3.072 77.607
##
## Coefficients:
## Estimate Std. Error t value Pr(>|t|)
## (Intercept) 16.711 4.084 4.092 7.16e-05 ***
## CountryBKF -1.535 4.864 -0.316 0.7528
## CountryZIM -16.155 6.833 -2.364 0.0194 *
## CountryZAM -16.031 17.800 -0.901 0.3693
## CountrySAF -15.809 7.362 -2.147 0.0335 *
## CountryUGA -16.285 8.758 -1.859 0.0651 .
## CountryURT -14.938 8.167 -1.829 0.0695 .
## CountrySWA -16.711 17.800 -0.939 0.3494
## CountrySEN 5.682 6.057 0.938 0.3498
## CountryZAI -13.851 17.800 -0.778 0.4378
## CountryMOZ -15.711 12.913 -1.217 0.2258
## CountryMLI -6.941 5.775 -1.202 0.2314
## CountryKEN -11.891 6.457 -1.842 0.0676 .
## CountryETH -16.061 17.800 -0.902 0.3684
## CountryGUI -13.737 6.057 -2.268 0.0248 *
## ---
## Signif. codes: 0 '***' 0.001 '**' 0.01 '*' 0.05 '.' 0.1 ' ' 1
##
## (Dispersion parameter for gaussian family taken to be 300.1614)
##
## Null deviance: 50549 on 155 degrees of freedom
## Residual deviance: 42323 on 141 degrees of freedom
## AIC: 1348.8
##
## Number of Fisher Scoring iterations: 2

data$Country <- relevel(data$Country, ref= "GUI")
model1<-glm((Prev_Tv) ~ Country,data=data, family=gaussian())
summary(model1)

##
## Call:
## glm(formula = (Prev_Tv) ~ Country, family = gaussian(), data = data)
##
## Deviance Residuals:
## Min 1Q Median 3Q Max
## -22.393 -9.770 -1.427 3.072 77.607
##
## Coefficients:
## Estimate Std. Error t value Pr(>|t|)
## (Intercept) 2.974 4.473 0.665 0.50725
## CountryGHA 13.737 6.057 2.268 0.02485 *
## CountryBKF 12.203 5.195 2.349 0.02022 *
## CountryZIM -2.418 7.073 -0.342 0.73296
## CountryZAM -2.294 17.893 -0.128 0.89817
## CountrySAF -2.071 7.585 -0.273 0.78517
## CountryUGA -2.548 8.947 -0.285 0.77622
## CountryURT -1.201 8.369 -0.143 0.88613
## CountrySWA -2.974 17.893 -0.166 0.86823
## CountrySEN 19.419 6.326 3.070 0.00257 **
## CountryZAI -0.114 17.893 -0.006 0.99493
## CountryMOZ -1.974 13.042 -0.151 0.87991
## CountryMLI 6.796 6.057 1.122 0.26376
## CountryKEN 1.846 6.710 0.275 0.78363
## CountryETH -2.324 17.893 -0.130 0.89685
## ---
## Signif. codes: 0 '***' 0.001 '**' 0.01 '*' 0.05 '.' 0.1 ' ' 1
##
## (Dispersion parameter for gaussian family taken to be 300.1614)
##
## Null deviance: 50549 on 155 degrees of freedom
## Residual deviance: 42323 on 141 degrees of freedom
## AIC: 1348.8
##
## Number of Fisher Scoring iterations: 2

data$Country <- relevel(data$Country, ref= "ETH")
model1<-glm((Prev_Tv) ~ Country,data=data, family=gaussian())
summary(model1)

##
## Call:
## glm(formula = (Prev_Tv) ~ Country, family = gaussian(), data = data)
##
## Deviance Residuals:
## Min 1Q Median 3Q Max
## -22.393 -9.770 -1.427 3.072 77.607
##
## Coefficients:
## Estimate Std. Error t value Pr(>|t|)
## (Intercept) 0.6500 17.3252 0.038 0.970
## CountryGUI 2.3240 17.8934 0.130 0.897
## CountryGHA 16.0611 17.7999 0.902 0.368
## CountryBKF 14.5265 17.5255 0.829 0.409
## CountryZIM -0.0940 18.1708 -0.005 0.996
## CountryZAM 0.0300 24.5015 0.001 0.999
## CountrySAF 0.2525 18.3761 0.014 0.989
## CountryUGA -0.2240 18.9788 -0.012 0.991
## CountryURT 1.1233 18.7133 0.060 0.952
## CountrySWA -0.6500 24.5015 -0.027 0.979
## CountrySEN 21.7427 17.8934 1.215 0.226
## CountryZAI 2.2100 24.5015 0.090 0.928
## CountryMOZ 0.3500 21.2189 0.016 0.987
## CountryMLI 9.1200 17.7999 0.512 0.609
## CountryKEN 4.1700 18.0326 0.231 0.817
##
## (Dispersion parameter for gaussian family taken to be 300.1614)
##
## Null deviance: 50549 on 155 degrees of freedom
## Residual deviance: 42323 on 141 degrees of freedom
## AIC: 1348.8
##
## Number of Fisher Scoring iterations: 2

data$Country <- relevel(data$Country, ref= "KEN")
model1<-glm((Prev_Tv) ~ Country,data=data, family=gaussian())
summary(model1)

##
## Call:
## glm(formula = (Prev_Tv) ~ Country, family = gaussian(), data = data)
##
## Deviance Residuals:
## Min 1Q Median 3Q Max
## -22.393 -9.770 -1.427 3.072 77.607
##
## Coefficients:
## Estimate Std. Error t value Pr(>|t|)
## (Intercept) 4.820 5.001 0.964 0.33683
## CountryETH -4.170 18.033 -0.231 0.81746
## CountryGUI -1.846 6.710 -0.275 0.78363
## CountryGHA 11.891 6.457 1.842 0.06762 .
## CountryBKF 10.357 5.656 1.831 0.06922 .
## CountryZIM -4.264 7.418 -0.575 0.56634
## CountryZAM -4.140 18.033 -0.230 0.81875
## CountrySAF -3.918 7.908 -0.495 0.62109
## CountryUGA -4.394 9.222 -0.476 0.63448
## CountryURT -3.047 8.663 -0.352 0.72559
## CountrySWA -4.820 18.033 -0.267 0.78963
## CountrySEN 17.573 6.710 2.619 0.00979 **
## CountryZAI -1.960 18.033 -0.109 0.91360
## CountryMOZ -3.820 13.232 -0.289 0.77324
## CountryMLI 4.950 6.457 0.767 0.44457
## ---
## Signif. codes: 0 '***' 0.001 '**' 0.01 '*' 0.05 '.' 0.1 ' ' 1
##
## (Dispersion parameter for gaussian family taken to be 300.1614)
##
## Null deviance: 50549 on 155 degrees of freedom
## Residual deviance: 42323 on 141 degrees of freedom
## AIC: 1348.8
##
## Number of Fisher Scoring iterations: 2

data$Country <- relevel(data$Country, ref= "MLI")
model1<-glm((Prev_Tv) ~ Country,data=data, family=gaussian())
summary(model1)

##
## Call:
## glm(formula = (Prev_Tv) ~ Country, family = gaussian(), data = data)
##
## Deviance Residuals:
## Min 1Q Median 3Q Max
## -22.393 -9.770 -1.427 3.072 77.607
##
## Coefficients:
## Estimate Std. Error t value Pr(>|t|)
## (Intercept) 9.770 4.084 2.393 0.0181 *
## CountryKEN -4.950 6.457 -0.767 0.4446
## CountryETH -9.120 17.800 -0.512 0.6092
## CountryGUI -6.796 6.057 -1.122 0.2638
## CountryGHA 6.941 5.775 1.202 0.2314
## CountryBKF 5.407 4.864 1.112 0.2682
## CountryZIM -9.214 6.833 -1.348 0.1797
## CountryZAM -9.090 17.800 -0.511 0.6104
## CountrySAF -8.868 7.362 -1.205 0.2304
## CountryUGA -9.344 8.758 -1.067 0.2879
## CountryURT -7.997 8.167 -0.979 0.3292
## CountrySWA -9.770 17.800 -0.549 0.5840
## CountrySEN 12.623 6.057 2.084 0.0390 *
## CountryZAI -6.910 17.800 -0.388 0.6985
## CountryMOZ -8.770 12.913 -0.679 0.4982
## ---
## Signif. codes: 0 '***' 0.001 '**' 0.01 '*' 0.05 '.' 0.1 ' ' 1
##
## (Dispersion parameter for gaussian family taken to be 300.1614)
##
## Null deviance: 50549 on 155 degrees of freedom
## Residual deviance: 42323 on 141 degrees of freedom
## AIC: 1348.8
##
## Number of Fisher Scoring iterations: 2

data$Country <- relevel(data$Country, ref= "MOZ")
model1<-glm((Prev_Tv) ~ Country,data=data, family=gaussian())
summary(model1)

##
## Call:
## glm(formula = (Prev_Tv) ~ Country, family = gaussian(), data = data)
##
## Deviance Residuals:
## Min 1Q Median 3Q Max
## -22.393 -9.770 -1.427 3.072 77.607
##
## Coefficients:
## Estimate Std. Error t value Pr(>|t|)
## (Intercept) 1.0000 12.2507 0.082 0.935
## CountryMLI 8.7700 12.9134 0.679 0.498
## CountryKEN 3.8200 13.2323 0.289 0.773
## CountryETH -0.3500 21.2189 -0.016 0.987
## CountryGUI 1.9740 13.0419 0.151 0.880
## CountryGHA 15.7111 12.9134 1.217 0.226
## CountryBKF 14.1765 12.5324 1.131 0.260
## CountryZIM -0.4440 13.4200 -0.033 0.974
## CountryZAM -0.3200 21.2189 -0.015 0.988
## CountrySAF -0.0975 13.6967 -0.007 0.994
## CountryUGA -0.5740 14.4953 -0.040 0.968
## CountryURT 0.7733 14.1459 0.055 0.956
## CountrySWA -1.0000 21.2189 -0.047 0.962
## CountrySEN 21.3927 13.0419 1.640 0.103
## CountryZAI 1.8600 21.2189 0.088 0.930
##
## (Dispersion parameter for gaussian family taken to be 300.1614)
##
## Null deviance: 50549 on 155 degrees of freedom
## Residual deviance: 42323 on 141 degrees of freedom
## AIC: 1348.8
##
## Number of Fisher Scoring iterations: 2

data$Country <- relevel(data$Country, ref= "ZAI")
model1<-glm((Prev_Tv) ~ Country,data=data, family=gaussian())
summary(model1)

##
## Call:
## glm(formula = (Prev_Tv) ~ Country, family = gaussian(), data = data)
##
## Deviance Residuals:
## Min 1Q Median 3Q Max
## -22.393 -9.770 -1.427 3.072 77.607
##
## Coefficients:
## Estimate Std. Error t value Pr(>|t|)
## (Intercept) 2.860 17.325 0.165 0.869
## CountryMOZ -1.860 21.219 -0.088 0.930
## CountryMLI 6.910 17.800 0.388 0.698
## CountryKEN 1.960 18.033 0.109 0.914
## CountryETH -2.210 24.502 -0.090 0.928
## CountryGUI 0.114 17.893 0.006 0.995
## CountryGHA 13.851 17.800 0.778 0.438
## CountryBKF 12.316 17.526 0.703 0.483
## CountryZIM -2.304 18.171 -0.127 0.899
## CountryZAM -2.180 24.502 -0.089 0.929
## CountrySAF -1.958 18.376 -0.107 0.915
## CountryUGA -2.434 18.979 -0.128 0.898
## CountryURT -1.087 18.713 -0.058 0.954
## CountrySWA -2.860 24.502 -0.117 0.907
## CountrySEN 19.533 17.893 1.092 0.277
##
## (Dispersion parameter for gaussian family taken to be 300.1614)
##
## Null deviance: 50549 on 155 degrees of freedom
## Residual deviance: 42323 on 141 degrees of freedom
## AIC: 1348.8
##
## Number of Fisher Scoring iterations: 2

data$Country <- relevel(data$Country, ref= "SEN")
model1<-glm((Prev_Tv) ~ Country,data=data, family=gaussian())
summary(model1)

##
## Call:
## glm(formula = (Prev_Tv) ~ Country, family = gaussian(), data = data)
##
## Deviance Residuals:
## Min 1Q Median 3Q Max
## -22.393 -9.770 -1.427 3.072 77.607
##
## Coefficients:
## Estimate Std. Error t value Pr(>|t|)
## (Intercept) 22.393 4.473 5.006 1.63e-06 ***
## CountryZAI -19.533 17.893 -1.092 0.27686
## CountryMOZ -21.393 13.042 -1.640 0.10317
## CountryMLI -12.623 6.057 -2.084 0.03896 *
## CountryKEN -17.573 6.710 -2.619 0.00979 **
## CountryETH -21.743 17.893 -1.215 0.22635
## CountryGUI -19.419 6.326 -3.070 0.00257 **
## CountryGHA -5.682 6.057 -0.938 0.34984
## CountryBKF -7.216 5.195 -1.389 0.16703
## CountryZIM -21.837 7.073 -3.087 0.00243 **
## CountryZAM -21.713 17.893 -1.213 0.22699
## CountrySAF -21.490 7.585 -2.833 0.00528 **
## CountryUGA -21.967 8.947 -2.455 0.01529 *
## CountryURT -20.619 8.369 -2.464 0.01495 *
## CountrySWA -22.393 17.893 -1.251 0.21284
## ---
## Signif. codes: 0 '***' 0.001 '**' 0.01 '*' 0.05 '.' 0.1 ' ' 1
##
## (Dispersion parameter for gaussian family taken to be 300.1614)
##
## Null deviance: 50549 on 155 degrees of freedom
## Residual deviance: 42323 on 141 degrees of freedom
## AIC: 1348.8
##
## Number of Fisher Scoring iterations: 2

data$Country <- relevel(data$Country, ref= "SWA")
model1<-glm((Prev_Tv) ~ Country,data=data, family=gaussian())
summary(model1)

##
## Call:
## glm(formula = (Prev_Tv) ~ Country, family = gaussian(), data = data)
##
## Deviance Residuals:
## Min 1Q Median 3Q Max
## -22.393 -9.770 -1.427 3.072 77.607
##
## Coefficients:
## Estimate Std. Error t value Pr(>|t|)
## (Intercept) 1.314e-13 1.733e+01 0.000 1.000
## CountrySEN 2.239e+01 1.789e+01 1.251 0.213
## CountryZAI 2.860e+00 2.450e+01 0.117 0.907
## CountryMOZ 1.000e+00 2.122e+01 0.047 0.962
## CountryMLI 9.770e+00 1.780e+01 0.549 0.584
## CountryKEN 4.820e+00 1.803e+01 0.267 0.790
## CountryETH 6.500e-01 2.450e+01 0.027 0.979
## CountryGUI 2.974e+00 1.789e+01 0.166 0.868
## CountryGHA 1.671e+01 1.780e+01 0.939 0.349
## CountryBKF 1.518e+01 1.753e+01 0.866 0.388
## CountryZIM 5.560e-01 1.817e+01 0.031 0.976
## CountryZAM 6.800e-01 2.450e+01 0.028 0.978
## CountrySAF 9.025e-01 1.838e+01 0.049 0.961
## CountryUGA 4.260e-01 1.898e+01 0.022 0.982
## CountryURT 1.773e+00 1.871e+01 0.095 0.925
##
## (Dispersion parameter for gaussian family taken to be 300.1614)
##
## Null deviance: 50549 on 155 degrees of freedom
## Residual deviance: 42323 on 141 degrees of freedom
## AIC: 1348.8
##
## Number of Fisher Scoring iterations: 2

data$Country <- relevel(data$Country, ref= "URT")
model1<-glm((Prev_Tv) ~ Country,data=data, family=gaussian())
summary(model1)

##
## Call:
## glm(formula = (Prev_Tv) ~ Country, family = gaussian(), data = data)
##
## Deviance Residuals:
## Min 1Q Median 3Q Max
## -22.393 -9.770 -1.427 3.072 77.607
##
## Coefficients:
## Estimate Std. Error t value Pr(>|t|)
## (Intercept) 1.7733 7.0730 0.251 0.8024
## CountrySWA -1.7733 18.7133 -0.095 0.9246
## CountrySEN 20.6193 8.3689 2.464 0.0149 *
## CountryZAI 1.0867 18.7133 0.058 0.9538
## CountryMOZ -0.7733 14.1459 -0.055 0.9565
## CountryMLI 7.9967 8.1672 0.979 0.3292
## CountryKEN 3.0467 8.6626 0.352 0.7256
## CountryETH -1.1233 18.7133 -0.060 0.9522
## CountryGUI 1.2007 8.3689 0.143 0.8861
## CountryGHA 14.9378 8.1672 1.829 0.0695 .
## CountryBKF 13.4032 7.5503 1.775 0.0780 .
## CountryZIM -1.2173 8.9467 -0.136 0.8920
## CountryZAM -1.0933 18.7133 -0.058 0.9535
## CountrySAF -0.8708 9.3567 -0.093 0.9260
## CountryUGA -1.3473 10.4909 -0.128 0.8980
## ---
## Signif. codes: 0 '***' 0.001 '**' 0.01 '*' 0.05 '.' 0.1 ' ' 1
##
## (Dispersion parameter for gaussian family taken to be 300.1614)
##
## Null deviance: 50549 on 155 degrees of freedom
## Residual deviance: 42323 on 141 degrees of freedom
## AIC: 1348.8
##
## Number of Fisher Scoring iterations: 2

data$Country <- relevel(data$Country, ref= "UGA")
model1<-glm((Prev_Tv) ~ Country,data=data, family=gaussian())
summary(model1)

##
## Call:
## glm(formula = (Prev_Tv) ~ Country, family = gaussian(), data = data)
##
## Deviance Residuals:
## Min 1Q Median 3Q Max
## -22.393 -9.770 -1.427 3.072 77.607
##
## Coefficients:
## Estimate Std. Error t value Pr(>|t|)
## (Intercept) 0.4260 7.7481 0.055 0.9562
## CountryURT 1.3473 10.4909 0.128 0.8980
## CountrySWA -0.4260 18.9788 -0.022 0.9821
## CountrySEN 21.9667 8.9467 2.455 0.0153 *
## CountryZAI 2.4340 18.9788 0.128 0.8981
## CountryMOZ 0.5740 14.4953 0.040 0.9685
## CountryMLI 9.3440 8.7583 1.067 0.2879
## CountryKEN 4.3940 9.2220 0.476 0.6345
## CountryETH 0.2240 18.9788 0.012 0.9906
## CountryGUI 2.5480 8.9467 0.285 0.7762
## CountryGHA 16.2851 8.7583 1.859 0.0651 .
## CountryBKF 14.7505 8.1861 1.802 0.0737 .
## CountryZIM 0.1300 9.4894 0.014 0.9891
## CountryZAM 0.2540 18.9788 0.013 0.9893
## CountrySAF 0.4765 9.8769 0.048 0.9616
## ---
## Signif. codes: 0 '***' 0.001 '**' 0.01 '*' 0.05 '.' 0.1 ' ' 1
##
## (Dispersion parameter for gaussian family taken to be 300.1614)
##
## Null deviance: 50549 on 155 degrees of freedom
## Residual deviance: 42323 on 141 degrees of freedom
## AIC: 1348.8
##
## Number of Fisher Scoring iterations: 2

data$Country <- relevel(data$Country, ref= "SAF")
model1<-glm((Prev_Tv) ~ Country,data=data, family=gaussian())
summary(model1)

##
## Call:
## glm(formula = (Prev_Tv) ~ Country, family = gaussian(), data = data)
##
## Deviance Residuals:
## Min 1Q Median 3Q Max
## -22.393 -9.770 -1.427 3.072 77.607
##
## Coefficients:
## Estimate Std. Error t value Pr(>|t|)
## (Intercept) 0.9025 6.1254 0.147 0.88308
## CountryUGA -0.4765 9.8769 -0.048 0.96159
## CountryURT 0.8708 9.3567 0.093 0.92598
## CountrySWA -0.9025 18.3761 -0.049 0.96090
## CountrySEN 21.4902 7.5849 2.833 0.00528 **
## CountryZAI 1.9575 18.3761 0.107 0.91532
## CountryMOZ 0.0975 13.6967 0.007 0.99433
## CountryMLI 8.8675 7.3618 1.205 0.23040
## CountryKEN 3.9175 7.9078 0.495 0.62109
## CountryETH -0.2525 18.3761 -0.014 0.98906
## CountryGUI 2.0715 7.5849 0.273 0.78517
## CountryGHA 15.8086 7.3618 2.147 0.03347 *
## CountryBKF 14.2740 6.6709 2.140 0.03410 *
## CountryZIM -0.3465 8.2180 -0.042 0.96643
## CountryZAM -0.2225 18.3761 -0.012 0.99036
## ---
## Signif. codes: 0 '***' 0.001 '**' 0.01 '*' 0.05 '.' 0.1 ' ' 1
##
## (Dispersion parameter for gaussian family taken to be 300.1614)
##
## Null deviance: 50549 on 155 degrees of freedom
## Residual deviance: 42323 on 141 degrees of freedom
## AIC: 1348.8
##
## Number of Fisher Scoring iterations: 2

data$Country <- relevel(data$Country, ref= "ZAM")
model1<-glm((Prev_Tv) ~ Country,data=data, family=gaussian())
summary(model1)

##
## Call:
## glm(formula = (Prev_Tv) ~ Country, family = gaussian(), data = data)
##
## Deviance Residuals:
## Min 1Q Median 3Q Max
## -22.393 -9.770 -1.427 3.072 77.607
##
## Coefficients:
## Estimate Std. Error t value Pr(>|t|)
## (Intercept) 0.6800 17.3252 0.039 0.969
## CountrySAF 0.2225 18.3761 0.012 0.990
## CountryUGA -0.2540 18.9788 -0.013 0.989
## CountryURT 1.0933 18.7133 0.058 0.953
## CountrySWA -0.6800 24.5015 -0.028 0.978
## CountrySEN 21.7127 17.8934 1.213 0.227
## CountryZAI 2.1800 24.5015 0.089 0.929
## CountryMOZ 0.3200 21.2189 0.015 0.988
## CountryMLI 9.0900 17.7999 0.511 0.610
## CountryKEN 4.1400 18.0326 0.230 0.819
## CountryETH -0.0300 24.5015 -0.001 0.999
## CountryGUI 2.2940 17.8934 0.128 0.898
## CountryGHA 16.0311 17.7999 0.901 0.369
## CountryBKF 14.4965 17.5255 0.827 0.410
## CountryZIM -0.1240 18.1708 -0.007 0.995
##
## (Dispersion parameter for gaussian family taken to be 300.1614)
##
## Null deviance: 50549 on 155 degrees of freedom
## Residual deviance: 42323 on 141 degrees of freedom
## AIC: 1348.8
##
## Number of Fisher Scoring iterations: 2

data$Country <- relevel(data$Country, ref= "ZIM")
model1<-glm((Prev_Tv) ~ Country,data=data, family=gaussian())
summary(model1)

##
## Call:
## glm(formula = (Prev_Tv) ~ Country, family = gaussian(), data = data)
##
## Deviance Residuals:
## Min 1Q Median 3Q Max
## -22.393 -9.770 -1.427 3.072 77.607
##
## Coefficients:
## Estimate Std. Error t value Pr(>|t|)
## (Intercept) 0.5560 5.4787 0.101 0.91931
## CountryZAM 0.1240 18.1708 0.007 0.99456
## CountrySAF 0.3465 8.2180 0.042 0.96643
## CountryUGA -0.1300 9.4894 -0.014 0.98909
## CountryURT 1.2173 8.9467 0.136 0.89196
## CountrySWA -0.5560 18.1708 -0.031 0.97563
## CountrySEN 21.8367 7.0730 3.087 0.00243 **
## CountryZAI 2.3040 18.1708 0.127 0.89928
## CountryMOZ 0.4440 13.4200 0.033 0.97365
## CountryMLI 9.2140 6.8331 1.348 0.17968
## CountryKEN 4.2640 7.4182 0.575 0.56634
## CountryETH 0.0940 18.1708 0.005 0.99588
## CountryGUI 2.4180 7.0730 0.342 0.73296
## CountryGHA 16.1551 6.8331 2.364 0.01943 *
## CountryBKF 14.6205 6.0825 2.404 0.01753 *
## ---
## Signif. codes: 0 '***' 0.001 '**' 0.01 '*' 0.05 '.' 0.1 ' ' 1
##
## (Dispersion parameter for gaussian family taken to be 300.1614)
##
## Null deviance: 50549 on 155 degrees of freedom
## Residual deviance: 42323 on 141 degrees of freedom
## AIC: 1348.8
##
## Number of Fisher Scoring iterations: 2

#======== Glm Tz per country
data$Country <- relevel(data$Country, ref= "BKF")
model1<-glm((Prev_Tz) ~ Country,data=data, family=gaussian())
summary(model1)

##
## Call:
## glm(formula = (Prev_Tz) ~ Country, family = gaussian(), data = data)
##
## Deviance Residuals:
## Min 1Q Median 3Q Max
## -34.998 -3.008 -1.012 0.000 65.002
##
## Coefficients:
## Estimate Std. Error t value Pr(>|t|)
## (Intercept) 3.0077 1.9654 1.530 0.128
## CountryZIM -1.9827 4.5248 -0.438 0.662
## CountryZAM -2.3277 13.0372 -0.179 0.859
## CountrySAF 0.9461 4.9625 0.191 0.849
## CountryUGA -1.9957 6.0897 -0.328 0.744
## CountryURT 2.0323 5.6167 0.362 0.718
## CountrySWA -3.0077 13.0372 -0.231 0.818
## CountrySEN 1.1203 3.8648 0.290 0.772
## CountryZAI -3.0077 13.0372 -0.231 0.818
## CountryMOZ -3.0077 9.3229 -0.323 0.747
## CountryMLI -2.4571 3.6181 -0.679 0.498
## CountryKEN -2.5827 4.2077 -0.614 0.540
## CountryETH -1.9177 13.0372 -0.147 0.883
## CountryGUI -3.0077 3.8648 -0.778 0.438
## CountryGHA 31.9901 3.6181 8.842 3.46e-15 ***
## ---
## Signif. codes: 0 '***' 0.001 '**' 0.01 '*' 0.05 '.' 0.1 ' ' 1
##
## (Dispersion parameter for gaussian family taken to be 166.1055)
##
## Null deviance: 41046 on 155 degrees of freedom
## Residual deviance: 23421 on 141 degrees of freedom
## AIC: 1256.5
##
## Number of Fisher Scoring iterations: 2

data$Country <- relevel(data$Country, ref= "GHA")
model1<-glm((Prev_Tz) ~ Country,data=data, family=gaussian())
summary(model1)

##
## Call:
## glm(formula = (Prev_Tz) ~ Country, family = gaussian(), data = data)
##
## Deviance Residuals:
## Min 1Q Median 3Q Max
## -34.998 -3.008 -1.012 0.000 65.002
##
## Coefficients:
## Estimate Std. Error t value Pr(>|t|)
## (Intercept) 34.998 3.038 11.521 < 2e-16 ***
## CountryBKF -31.990 3.618 -8.842 3.46e-15 ***
## CountryZIM -33.973 5.083 -6.683 5.02e-10 ***
## CountryZAM -34.318 13.241 -2.592 0.010555 *
## CountrySAF -31.044 5.476 -5.669 7.83e-08 ***
## CountryUGA -33.986 6.515 -5.216 6.38e-07 ***
## CountryURT -29.958 6.076 -4.931 2.27e-06 ***
## CountrySWA -34.998 13.241 -2.643 0.009145 **
## CountrySEN -30.870 4.506 -6.851 2.09e-10 ***
## CountryZAI -34.998 13.241 -2.643 0.009145 **
## CountryMOZ -34.998 9.606 -3.643 0.000378 ***
## CountryMLI -34.447 4.296 -8.018 3.71e-13 ***
## CountryKEN -34.573 4.803 -7.198 3.33e-11 ***
## CountryETH -33.908 13.241 -2.561 0.011496 *
## CountryGUI -34.998 4.506 -7.767 1.50e-12 ***
## ---
## Signif. codes: 0 '***' 0.001 '**' 0.01 '*' 0.05 '.' 0.1 ' ' 1
##
## (Dispersion parameter for gaussian family taken to be 166.1055)
##
## Null deviance: 41046 on 155 degrees of freedom
## Residual deviance: 23421 on 141 degrees of freedom
## AIC: 1256.5
##
## Number of Fisher Scoring iterations: 2

data$Country <- relevel(data$Country, ref= "GUI")
model1<-glm((Prev_Tz) ~ Country,data=data, family=gaussian())
summary(model1)

##
## Call:
## glm(formula = (Prev_Tz) ~ Country, family = gaussian(), data = data)
##
## Deviance Residuals:
## Min 1Q Median 3Q Max
## -34.998 -3.008 -1.012 0.000 65.002
##
## Coefficients:
## Estimate Std. Error t value Pr(>|t|)
## (Intercept) 0.000e+00 3.328e+00 0.000 1.000
## CountryGHA 3.500e+01 4.506e+00 7.767 1.5e-12 ***
## CountryBKF 3.008e+00 3.865e+00 0.778 0.438
## CountryZIM 1.025e+00 5.262e+00 0.195 0.846
## CountryZAM 6.800e-01 1.331e+01 0.051 0.959
## CountrySAF 3.954e+00 5.642e+00 0.701 0.485
## CountryUGA 1.012e+00 6.655e+00 0.152 0.879
## CountryURT 5.040e+00 6.226e+00 0.810 0.420
## CountrySWA -8.168e-15 1.331e+01 0.000 1.000
## CountrySEN 4.128e+00 4.706e+00 0.877 0.382
## CountryZAI 3.757e-15 1.331e+01 0.000 1.000
## CountryMOZ 6.415e-16 9.702e+00 0.000 1.000
## CountryMLI 5.506e-01 4.506e+00 0.122 0.903
## CountryKEN 4.250e-01 4.992e+00 0.085 0.932
## CountryETH 1.090e+00 1.331e+01 0.082 0.935
## ---
## Signif. codes: 0 '***' 0.001 '**' 0.01 '*' 0.05 '.' 0.1 ' ' 1
##
## (Dispersion parameter for gaussian family taken to be 166.1055)
##
## Null deviance: 41046 on 155 degrees of freedom
## Residual deviance: 23421 on 141 degrees of freedom
## AIC: 1256.5
##
## Number of Fisher Scoring iterations: 2

data$Country <- relevel(data$Country, ref= "ETH")
model1<-glm((Prev_Tz) ~ Country,data=data, family=gaussian())
summary(model1)

##
## Call:
## glm(formula = (Prev_Tz) ~ Country, family = gaussian(), data = data)
##
## Deviance Residuals:
## Min 1Q Median 3Q Max
## -34.998 -3.008 -1.012 0.000 65.002
##
## Coefficients:
## Estimate Std. Error t value Pr(>|t|)
## (Intercept) 1.0900 12.8882 0.085 0.9327
## CountryGUI -1.0900 13.3109 -0.082 0.9349
## CountryGHA 33.9078 13.2414 2.561 0.0115 *
## CountryBKF 1.9177 13.0372 0.147 0.8833
## CountryZIM -0.0650 13.5173 -0.005 0.9962
## CountryZAM -0.4100 18.2267 -0.022 0.9821
## CountrySAF 2.8638 13.6700 0.209 0.8344
## CountryUGA -0.0780 14.1183 -0.006 0.9956
## CountryURT 3.9500 13.9208 0.284 0.7770
## CountrySWA -1.0900 18.2267 -0.060 0.9524
## CountrySEN 3.0380 13.3109 0.228 0.8198
## CountryZAI -1.0900 18.2267 -0.060 0.9524
## CountryMOZ -1.0900 15.7848 -0.069 0.9450
## CountryMLI -0.5394 13.2414 -0.041 0.9676
## CountryKEN -0.6650 13.4145 -0.050 0.9605
## ---
## Signif. codes: 0 '***' 0.001 '**' 0.01 '*' 0.05 '.' 0.1 ' ' 1
##
## (Dispersion parameter for gaussian family taken to be 166.1055)
##
## Null deviance: 41046 on 155 degrees of freedom
## Residual deviance: 23421 on 141 degrees of freedom
## AIC: 1256.5
##
## Number of Fisher Scoring iterations: 2

data$Country <- relevel(data$Country, ref= "KEN")
model1<-glm((Prev_Tz) ~ Country,data=data, family=gaussian())
summary(model1)

##
## Call:
## glm(formula = (Prev_Tz) ~ Country, family = gaussian(), data = data)
##
## Deviance Residuals:
## Min 1Q Median 3Q Max
## -34.998 -3.008 -1.012 0.000 65.002
##
## Coefficients:
## Estimate Std. Error t value Pr(>|t|)
## (Intercept) 0.4250 3.7205 0.114 0.909
## CountryETH 0.6650 13.4145 0.050 0.961
## CountryGUI -0.4250 4.9916 -0.085 0.932
## CountryGHA 34.5728 4.8031 7.198 3.33e-11 ***
## CountryBKF 2.5827 4.2077 0.614 0.540
## CountryZIM 0.6000 5.5184 0.109 0.914
## CountryZAM 0.2550 13.4145 0.019 0.985
## CountrySAF 3.5287 5.8826 0.600 0.550
## CountryUGA 0.5870 6.8603 0.086 0.932
## CountryURT 4.6150 6.4441 0.716 0.475
## CountrySWA -0.4250 13.4145 -0.032 0.975
## CountrySEN 3.7030 4.9916 0.742 0.459
## CountryZAI -0.4250 13.4145 -0.032 0.975
## CountryMOZ -0.4250 9.8435 -0.043 0.966
## CountryMLI 0.1256 4.8031 0.026 0.979
## ---
## Signif. codes: 0 '***' 0.001 '**' 0.01 '*' 0.05 '.' 0.1 ' ' 1
##
## (Dispersion parameter for gaussian family taken to be 166.1055)
##
## Null deviance: 41046 on 155 degrees of freedom
## Residual deviance: 23421 on 141 degrees of freedom
## AIC: 1256.5
##
## Number of Fisher Scoring iterations: 2

data$Country <- relevel(data$Country, ref= "MLI")
model1<-glm((Prev_Tz) ~ Country,data=data, family=gaussian())
summary(model1)

##
## Call:
## glm(formula = (Prev_Tz) ~ Country, family = gaussian(), data = data)
##
## Deviance Residuals:
## Min 1Q Median 3Q Max
## -34.998 -3.008 -1.012 0.000 65.002
##
## Coefficients:
## Estimate Std. Error t value Pr(>|t|)
## (Intercept) 0.5506 3.0378 0.181 0.856
## CountryKEN -0.1256 4.8031 -0.026 0.979
## CountryETH 0.5394 13.2414 0.041 0.968
## CountryGUI -0.5506 4.5058 -0.122 0.903
## CountryGHA 34.4472 4.2961 8.018 3.71e-13 ***
## CountryBKF 2.4571 3.6181 0.679 0.498
## CountryZIM 0.4744 5.0832 0.093 0.926
## CountryZAM 0.1294 13.2414 0.010 0.992
## CountrySAF 3.4032 5.4764 0.621 0.535
## CountryUGA 0.4614 6.5153 0.071 0.944
## CountryURT 4.4894 6.0756 0.739 0.461
## CountrySWA -0.5506 13.2414 -0.042 0.967
## CountrySEN 3.5774 4.5058 0.794 0.429
## CountryZAI -0.5506 13.2414 -0.042 0.967
## CountryMOZ -0.5506 9.6063 -0.057 0.954
## ---
## Signif. codes: 0 '***' 0.001 '**' 0.01 '*' 0.05 '.' 0.1 ' ' 1
##
## (Dispersion parameter for gaussian family taken to be 166.1055)
##
## Null deviance: 41046 on 155 degrees of freedom
## Residual deviance: 23421 on 141 degrees of freedom
## AIC: 1256.5
##
## Number of Fisher Scoring iterations: 2

data$Country <- relevel(data$Country, ref= "MOZ")
model1<-glm((Prev_Tz) ~ Country,data=data, family=gaussian())
summary(model1)

##
## Call:
## glm(formula = (Prev_Tz) ~ Country, family = gaussian(), data = data)
##
## Deviance Residuals:
## Min 1Q Median 3Q Max
## -34.998 -3.008 -1.012 0.000 65.002
##
## Coefficients:
## Estimate Std. Error t value Pr(>|t|)
## (Intercept) 3.176e-14 9.113e+00 0.000 1.000000
## CountryMLI 5.506e-01 9.606e+00 0.057 0.954378
## CountryKEN 4.250e-01 9.844e+00 0.043 0.965623
## CountryETH 1.090e+00 1.578e+01 0.069 0.945044
## CountryGUI -3.618e-14 9.702e+00 0.000 1.000000
## CountryGHA 3.500e+01 9.606e+00 3.643 0.000378 ***
## CountryBKF 3.008e+00 9.323e+00 0.323 0.747466
## CountryZIM 1.025e+00 9.983e+00 0.103 0.918368
## CountryZAM 6.800e-01 1.578e+01 0.043 0.965699
## CountrySAF 3.954e+00 1.019e+01 0.388 0.698571
## CountryUGA 1.012e+00 1.078e+01 0.094 0.925361
## CountryURT 5.040e+00 1.052e+01 0.479 0.632721
## CountrySWA -2.555e-14 1.578e+01 0.000 1.000000
## CountrySEN 4.128e+00 9.702e+00 0.425 0.671132
## CountryZAI -4.045e-14 1.578e+01 0.000 1.000000
## ---
## Signif. codes: 0 '***' 0.001 '**' 0.01 '*' 0.05 '.' 0.1 ' ' 1
##
## (Dispersion parameter for gaussian family taken to be 166.1055)
##
## Null deviance: 41046 on 155 degrees of freedom
## Residual deviance: 23421 on 141 degrees of freedom
## AIC: 1256.5
##
## Number of Fisher Scoring iterations: 2

data$Country <- relevel(data$Country, ref= "ZAI")
model1<-glm((Prev_Tz) ~ Country,data=data, family=gaussian())
summary(model1)

##
## Call:
## glm(formula = (Prev_Tz) ~ Country, family = gaussian(), data = data)
##
## Deviance Residuals:
## Min 1Q Median 3Q Max
## -34.998 -3.008 -1.012 0.000 65.002
##
## Coefficients:
## Estimate Std. Error t value Pr(>|t|)
## (Intercept) 9.204e-14 1.289e+01 0.000 1.00000
## CountryMOZ -9.421e-14 1.578e+01 0.000 1.00000
## CountryMLI 5.506e-01 1.324e+01 0.042 0.96689
## CountryKEN 4.250e-01 1.341e+01 0.032 0.97477
## CountryETH 1.090e+00 1.823e+01 0.060 0.95240
## CountryGUI -8.908e-14 1.331e+01 0.000 1.00000
## CountryGHA 3.500e+01 1.324e+01 2.643 0.00915 **
## CountryBKF 3.008e+00 1.304e+01 0.231 0.81788
## CountryZIM 1.025e+00 1.352e+01 0.076 0.93966
## CountryZAM 6.800e-01 1.823e+01 0.037 0.97029
## CountrySAF 3.954e+00 1.367e+01 0.289 0.77283
## CountryUGA 1.012e+00 1.412e+01 0.072 0.94296
## CountryURT 5.040e+00 1.392e+01 0.362 0.71786
## CountrySWA -9.613e-14 1.823e+01 0.000 1.00000
## CountrySEN 4.128e+00 1.331e+01 0.310 0.75693
## ---
## Signif. codes: 0 '***' 0.001 '**' 0.01 '*' 0.05 '.' 0.1 ' ' 1
##
## (Dispersion parameter for gaussian family taken to be 166.1055)
##
## Null deviance: 41046 on 155 degrees of freedom
## Residual deviance: 23421 on 141 degrees of freedom
## AIC: 1256.5
##
## Number of Fisher Scoring iterations: 2

data$Country <- relevel(data$Country, ref= "SEN")
model1<-glm((Prev_Tz) ~ Country,data=data, family=gaussian())
summary(model1)

##
## Call:
## glm(formula = (Prev_Tz) ~ Country, family = gaussian(), data = data)
##
## Deviance Residuals:
## Min 1Q Median 3Q Max
## -34.998 -3.008 -1.012 0.000 65.002
##
## Coefficients:
## Estimate Std. Error t value Pr(>|t|)
## (Intercept) 4.1280 3.3277 1.240 0.217
## CountryZAI -4.1280 13.3109 -0.310 0.757
## CountryMOZ -4.1280 9.7019 -0.425 0.671
## CountryMLI -3.5774 4.5058 -0.794 0.429
## CountryKEN -3.7030 4.9916 -0.742 0.459
## CountryETH -3.0380 13.3109 -0.228 0.820
## CountryGUI -4.1280 4.7061 -0.877 0.382
## CountryGHA 30.8698 4.5058 6.851 2.09e-10 ***
## CountryBKF -1.1203 3.8648 -0.290 0.772
## CountryZIM -3.1030 5.2616 -0.590 0.556
## CountryZAM -3.4480 13.3109 -0.259 0.796
## CountrySAF -0.1742 5.6424 -0.031 0.975
## CountryUGA -3.1160 6.6554 -0.468 0.640
## CountryURT 0.9120 6.2256 0.146 0.884
## CountrySWA -4.1280 13.3109 -0.310 0.757
## ---
## Signif. codes: 0 '***' 0.001 '**' 0.01 '*' 0.05 '.' 0.1 ' ' 1
##
## (Dispersion parameter for gaussian family taken to be 166.1055)
##
## Null deviance: 41046 on 155 degrees of freedom
## Residual deviance: 23421 on 141 degrees of freedom
## AIC: 1256.5
##
## Number of Fisher Scoring iterations: 2

data$Country <- relevel(data$Country, ref= "SWA")
model1<-glm((Prev_Tz) ~ Country,data=data, family=gaussian())
summary(model1)

##
## Call:
## glm(formula = (Prev_Tz) ~ Country, family = gaussian(), data = data)
##
## Deviance Residuals:
## Min 1Q Median 3Q Max
## -34.998 -3.008 -1.012 0.000 65.002
##
## Coefficients:
## Estimate Std. Error t value Pr(>|t|)
## (Intercept) 6.756e-15 1.289e+01 0.000 1.00000
## CountrySEN 4.128e+00 1.331e+01 0.310 0.75693
## CountryZAI -6.944e-15 1.823e+01 0.000 1.00000
## CountryMOZ -3.519e-15 1.578e+01 0.000 1.00000
## CountryMLI 5.506e-01 1.324e+01 0.042 0.96689
## CountryKEN 4.250e-01 1.341e+01 0.032 0.97477
## CountryETH 1.090e+00 1.823e+01 0.060 0.95240
## CountryGUI -1.781e-14 1.331e+01 0.000 1.00000
## CountryGHA 3.500e+01 1.324e+01 2.643 0.00915 **
## CountryBKF 3.008e+00 1.304e+01 0.231 0.81788
## CountryZIM 1.025e+00 1.352e+01 0.076 0.93966
## CountryZAM 6.800e-01 1.823e+01 0.037 0.97029
## CountrySAF 3.954e+00 1.367e+01 0.289 0.77283
## CountryUGA 1.012e+00 1.412e+01 0.072 0.94296
## CountryURT 5.040e+00 1.392e+01 0.362 0.71786
## ---
## Signif. codes: 0 '***' 0.001 '**' 0.01 '*' 0.05 '.' 0.1 ' ' 1
##
## (Dispersion parameter for gaussian family taken to be 166.1055)
##
## Null deviance: 41046 on 155 degrees of freedom
## Residual deviance: 23421 on 141 degrees of freedom
## AIC: 1256.5
##
## Number of Fisher Scoring iterations: 2

data$Country <- relevel(data$Country, ref= "URT")
model1<-glm((Prev_Tz) ~ Country,data=data, family=gaussian())
summary(model1)

##
## Call:
## glm(formula = (Prev_Tz) ~ Country, family = gaussian(), data = data)
##
## Deviance Residuals:
## Min 1Q Median 3Q Max
## -34.998 -3.008 -1.012 0.000 65.002
##
## Coefficients:
## Estimate Std. Error t value Pr(>|t|)
## (Intercept) 5.040 5.262 0.958 0.340
## CountrySWA -5.040 13.921 -0.362 0.718
## CountrySEN -0.912 6.226 -0.146 0.884
## CountryZAI -5.040 13.921 -0.362 0.718
## CountryMOZ -5.040 10.523 -0.479 0.633
## CountryMLI -4.489 6.076 -0.739 0.461
## CountryKEN -4.615 6.444 -0.716 0.475
## CountryETH -3.950 13.921 -0.284 0.777
## CountryGUI -5.040 6.226 -0.810 0.420
## CountryGHA 29.958 6.076 4.931 2.27e-06 ***
## CountryBKF -2.032 5.617 -0.362 0.718
## CountryZIM -4.015 6.655 -0.603 0.547
## CountryZAM -4.360 13.921 -0.313 0.755
## CountrySAF -1.086 6.960 -0.156 0.876
## CountryUGA -4.028 7.804 -0.516 0.607
## ---
## Signif. codes: 0 '***' 0.001 '**' 0.01 '*' 0.05 '.' 0.1 ' ' 1
##
## (Dispersion parameter for gaussian family taken to be 166.1055)
##
## Null deviance: 41046 on 155 degrees of freedom
## Residual deviance: 23421 on 141 degrees of freedom
## AIC: 1256.5
##
## Number of Fisher Scoring iterations: 2

data$Country <- relevel(data$Country, ref= "UGA")
model1<-glm((Prev_Tz) ~ Country,data=data, family=gaussian())
summary(model1)

##
## Call:
## glm(formula = (Prev_Tz) ~ Country, family = gaussian(), data = data)
##
## Deviance Residuals:
## Min 1Q Median 3Q Max
## -34.998 -3.008 -1.012 0.000 65.002
##
## Coefficients:
## Estimate Std. Error t value Pr(>|t|)
## (Intercept) 1.0120 5.7638 0.176 0.861
## CountryURT 4.0280 7.8042 0.516 0.607
## CountrySWA -1.0120 14.1183 -0.072 0.943
## CountrySEN 3.1160 6.6554 0.468 0.640
## CountryZAI -1.0120 14.1183 -0.072 0.943
## CountryMOZ -1.0120 10.7830 -0.094 0.925
## CountryMLI -0.4614 6.5153 -0.071 0.944
## CountryKEN -0.5870 6.8603 -0.086 0.932
## CountryETH 0.0780 14.1183 0.006 0.996
## CountryGUI -1.0120 6.6554 -0.152 0.879
## CountryGHA 33.9858 6.5153 5.216 6.38e-07 ***
## CountryBKF 1.9957 6.0897 0.328 0.744
## CountryZIM 0.0130 7.0591 0.002 0.999
## CountryZAM -0.3320 14.1183 -0.024 0.981
## CountrySAF 2.9417 7.3474 0.400 0.689
## ---
## Signif. codes: 0 '***' 0.001 '**' 0.01 '*' 0.05 '.' 0.1 ' ' 1
##
## (Dispersion parameter for gaussian family taken to be 166.1055)
##
## Null deviance: 41046 on 155 degrees of freedom
## Residual deviance: 23421 on 141 degrees of freedom
## AIC: 1256.5
##
## Number of Fisher Scoring iterations: 2

data$Country <- relevel(data$Country, ref= "SAF")
model1<-glm((Prev_Tz) ~ Country,data=data, family=gaussian())
summary(model1)

##
## Call:
## glm(formula = (Prev_Tz) ~ Country, family = gaussian(), data = data)
##
## Deviance Residuals:
## Min 1Q Median 3Q Max
## -34.998 -3.008 -1.012 0.000 65.002
##
## Coefficients:
## Estimate Std. Error t value Pr(>|t|)
## (Intercept) 3.9538 4.5567 0.868 0.387
## CountryUGA -2.9417 7.3474 -0.400 0.689
## CountryURT 1.0862 6.9604 0.156 0.876
## CountrySWA -3.9538 13.6700 -0.289 0.773
## CountrySEN 0.1743 5.6424 0.031 0.975
## CountryZAI -3.9537 13.6700 -0.289 0.773
## CountryMOZ -3.9537 10.1890 -0.388 0.699
## CountryMLI -3.4032 5.4764 -0.621 0.535
## CountryKEN -3.5288 5.8826 -0.600 0.550
## CountryETH -2.8637 13.6700 -0.209 0.834
## CountryGUI -3.9537 5.6424 -0.701 0.485
## CountryGHA 31.0440 5.4764 5.669 7.83e-08 ***
## CountryBKF -0.9461 4.9625 -0.191 0.849
## CountryZIM -2.9288 6.1134 -0.479 0.633
## CountryZAM -3.2737 13.6700 -0.239 0.811
## ---
## Signif. codes: 0 '***' 0.001 '**' 0.01 '*' 0.05 '.' 0.1 ' ' 1
##
## (Dispersion parameter for gaussian family taken to be 166.1055)
##
## Null deviance: 41046 on 155 degrees of freedom
## Residual deviance: 23421 on 141 degrees of freedom
## AIC: 1256.5
##
## Number of Fisher Scoring iterations: 2

data$Country <- relevel(data$Country, ref= "ZAM")
model1<-glm((Prev_Tz) ~ Country,data=data, family=gaussian())
summary(model1)

##
## Call:
## glm(formula = (Prev_Tz) ~ Country, family = gaussian(), data = data)
##
## Deviance Residuals:
## Min 1Q Median 3Q Max
## -34.998 -3.008 -1.012 0.000 65.002
##
## Coefficients:
## Estimate Std. Error t value Pr(>|t|)
## (Intercept) 0.6800 12.8882 0.053 0.9580
## CountrySAF 3.2737 13.6700 0.239 0.8111
## CountryUGA 0.3320 14.1183 0.024 0.9813
## CountryURT 4.3600 13.9208 0.313 0.7546
## CountrySWA -0.6800 18.2267 -0.037 0.9703
## CountrySEN 3.4480 13.3109 0.259 0.7960
## CountryZAI -0.6800 18.2267 -0.037 0.9703
## CountryMOZ -0.6800 15.7847 -0.043 0.9657
## CountryMLI -0.1294 13.2414 -0.010 0.9922
## CountryKEN -0.2550 13.4145 -0.019 0.9849
## CountryETH 0.4100 18.2267 0.022 0.9821
## CountryGUI -0.6800 13.3109 -0.051 0.9593
## CountryGHA 34.3178 13.2414 2.592 0.0106 *
## CountryBKF 2.3277 13.0372 0.179 0.8586
## CountryZIM 0.3450 13.5173 0.026 0.9797
## ---
## Signif. codes: 0 '***' 0.001 '**' 0.01 '*' 0.05 '.' 0.1 ' ' 1
##
## (Dispersion parameter for gaussian family taken to be 166.1055)
##
## Null deviance: 41046 on 155 degrees of freedom
## Residual deviance: 23421 on 141 degrees of freedom
## AIC: 1256.5
##
## Number of Fisher Scoring iterations: 2

data$Country <- relevel(data$Country, ref= "ZIM")
model1<-glm((Prev_Tz) ~ Country,data=data, family=gaussian())
summary(model1)

##
## Call:
## glm(formula = (Prev_Tz) ~ Country, family = gaussian(), data = data)
##
## Deviance Residuals:
## Min 1Q Median 3Q Max
## -34.998 -3.008 -1.012 0.000 65.002
##
## Coefficients:
## Estimate Std. Error t value Pr(>|t|)
## (Intercept) 1.0250 4.0756 0.251 0.802
## CountryZAM -0.3450 13.5173 -0.026 0.980
## CountrySAF 2.9287 6.1134 0.479 0.633
## CountryUGA -0.0130 7.0591 -0.002 0.999
## CountryURT 4.0150 6.6554 0.603 0.547
## CountrySWA -1.0250 13.5173 -0.076 0.940
## CountrySEN 3.1030 5.2616 0.590 0.556
## CountryZAI -1.0250 13.5173 -0.076 0.940
## CountryMOZ -1.0250 9.9832 -0.103 0.918
## CountryMLI -0.4744 5.0832 -0.093 0.926
## CountryKEN -0.6000 5.5184 -0.109 0.914
## CountryETH 0.0650 13.5173 0.005 0.996
## CountryGUI -1.0250 5.2616 -0.195 0.846
## CountryGHA 33.9728 5.0832 6.683 5.02e-10 ***
## CountryBKF 1.9827 4.5248 0.438 0.662
## ---
## Signif. codes: 0 '***' 0.001 '**' 0.01 '*' 0.05 '.' 0.1 ' ' 1
##
## (Dispersion parameter for gaussian family taken to be 166.1055)
##
## Null deviance: 41046 on 155 degrees of freedom
## Residual deviance: 23421 on 141 degrees of freedom
## AIC: 1256.5
##
## Number of Fisher Scoring iterations: 2

#======== Glm Tsg per country
data$Country <- relevel(data$Country, ref= "BKF")
model1<-glm((Prev_Tsg) ~ Country,data=data, family=gaussian())
summary(model1)

##
## Call:
## glm(formula = (Prev_Tsg) ~ Country, family = gaussian(), data = data)
##
## Deviance Residuals:
## Min 1Q Median 3Q Max
## -16.34 -4.28 0.00 0.00 57.34
##
## Coefficients:
## Estimate Std. Error t value Pr(>|t|)
## (Intercept) 4.2798 1.6499 2.594 0.01049 *
## CountryZIM 12.0632 3.7984 3.176 0.00184 **
## CountryZAM 30.6502 10.9445 2.801 0.00582 **
## CountrySAF 6.4140 4.1659 1.540 0.12589
## CountryUGA 0.7482 5.1122 0.146 0.88384
## CountryURT 2.5236 4.7151 0.535 0.59335
## CountrySWA -4.2798 10.9445 -0.391 0.69635
## CountrySEN -3.6944 3.2444 -1.139 0.25676
## CountryZAI -4.2798 10.9445 -0.391 0.69635
## CountryMOZ -1.2798 7.8264 -0.164 0.87034
## CountryMLI -4.2798 3.0374 -1.409 0.16102
## CountryKEN 10.3436 3.5323 2.928 0.00398 **
## CountryETH 6.1802 10.9445 0.565 0.57318
## CountryGUI -4.2798 3.2444 -1.319 0.18927
## CountryGHA -4.2798 3.0374 -1.409 0.16102
## ---
## Signif. codes: 0 '***' 0.001 '**' 0.01 '*' 0.05 '.' 0.1 ' ' 1
##
## (Dispersion parameter for gaussian family taken to be 117.0589)
##
## Null deviance: 21742 on 155 degrees of freedom
## Residual deviance: 16505 on 141 degrees of freedom
## AIC: 1201.9
##
## Number of Fisher Scoring iterations: 2

data$Country <- relevel(data$Country, ref= "GHA")
model1<-glm((Prev_Tsg) ~ Country,data=data, family=gaussian())
summary(model1)

##
## Call:
## glm(formula = (Prev_Tsg) ~ Country, family = gaussian(), data = data)
##
## Deviance Residuals:
## Min 1Q Median 3Q Max
## -16.34 -4.28 0.00 0.00 57.34
##
## Coefficients:
## Estimate Std. Error t value Pr(>|t|)
## (Intercept) -7.822e-15 2.550e+00 0.000 1.000000
## CountryBKF 4.280e+00 3.037e+00 1.409 0.161025
## CountryZIM 1.634e+01 4.267e+00 3.830 0.000192 ***
## CountryZAM 3.493e+01 1.112e+01 3.142 0.002043 **
## CountrySAF 1.069e+01 4.597e+00 2.326 0.021441 *
## CountryUGA 5.028e+00 5.469e+00 0.919 0.359516
## CountryURT 6.803e+00 5.100e+00 1.334 0.184385
## CountrySWA 1.775e-14 1.112e+01 0.000 1.000000
## CountrySEN 5.853e-01 3.782e+00 0.155 0.877241
## CountryZAI -2.223e-15 1.112e+01 0.000 1.000000
## CountryMOZ 3.000e+00 8.064e+00 0.372 0.710444
## CountryMLI 9.383e-15 3.606e+00 0.000 1.000000
## CountryKEN 1.462e+01 4.032e+00 3.627 0.000400 ***
## CountryETH 1.046e+01 1.112e+01 0.941 0.348315
## CountryGUI -1.164e-16 3.782e+00 0.000 1.000000
## ---
## Signif. codes: 0 '***' 0.001 '**' 0.01 '*' 0.05 '.' 0.1 ' ' 1
##
## (Dispersion parameter for gaussian family taken to be 117.0589)
##
## Null deviance: 21742 on 155 degrees of freedom
## Residual deviance: 16505 on 141 degrees of freedom
## AIC: 1201.9
##
## Number of Fisher Scoring iterations: 2

data$Country <- relevel(data$Country, ref= "GUI")
model1<-glm((Prev_Tsg) ~ Country,data=data, family=gaussian())
summary(model1)

##
## Call:
## glm(formula = (Prev_Tsg) ~ Country, family = gaussian(), data = data)
##
## Deviance Residuals:
## Min 1Q Median 3Q Max
## -16.34 -4.28 0.00 0.00 57.34
##
## Coefficients:
## Estimate Std. Error t value Pr(>|t|)
## (Intercept) 1.634e-14 2.794e+00 0.000 1.000000
## CountryGHA -1.959e-14 3.782e+00 0.000 1.000000
## CountryBKF 4.280e+00 3.244e+00 1.319 0.189268
## CountryZIM 1.634e+01 4.417e+00 3.700 0.000308 ***
## CountryZAM 3.493e+01 1.117e+01 3.126 0.002153 **
## CountrySAF 1.069e+01 4.737e+00 2.258 0.025505 *
## CountryUGA 5.028e+00 5.587e+00 0.900 0.369692
## CountryURT 6.803e+00 5.226e+00 1.302 0.195121
## CountrySWA 1.018e-14 1.117e+01 0.000 1.000000
## CountrySEN 5.853e-01 3.951e+00 0.148 0.882428
## CountryZAI 6.324e-15 1.117e+01 0.000 1.000000
## CountryMOZ 3.000e+00 8.145e+00 0.368 0.713168
## CountryMLI -1.717e-14 3.782e+00 0.000 1.000000
## CountryKEN 1.462e+01 4.190e+00 3.490 0.000645 ***
## CountryETH 1.046e+01 1.117e+01 0.936 0.350830
## ---
## Signif. codes: 0 '***' 0.001 '**' 0.01 '*' 0.05 '.' 0.1 ' ' 1
##
## (Dispersion parameter for gaussian family taken to be 117.0589)
##
## Null deviance: 21742 on 155 degrees of freedom
## Residual deviance: 16505 on 141 degrees of freedom
## AIC: 1201.9
##
## Number of Fisher Scoring iterations: 2

data$Country <- relevel(data$Country, ref= "ETH")
model1<-glm((Prev_Tsg) ~ Country,data=data, family=gaussian())
summary(model1)

##
## Call:
## glm(formula = (Prev_Tsg) ~ Country, family = gaussian(), data = data)
##
## Deviance Residuals:
## Min 1Q Median 3Q Max
## -16.34 -4.28 0.00 0.00 57.34
##
## Coefficients:
## Estimate Std. Error t value Pr(>|t|)
## (Intercept) 10.4600 10.8194 0.967 0.335
## CountryGUI -10.4600 11.1742 -0.936 0.351
## CountryGHA -10.4600 11.1159 -0.941 0.348
## CountryBKF -6.1802 10.9445 -0.565 0.573
## CountryZIM 5.8830 11.3475 0.518 0.605
## CountryZAM 24.4700 15.3009 1.599 0.112
## CountrySAF 0.2337 11.4757 0.020 0.984
## CountryUGA -5.4320 11.8520 -0.458 0.647
## CountryURT -3.6567 11.6863 -0.313 0.755
## CountrySWA -10.4600 15.3009 -0.684 0.495
## CountrySEN -9.8747 11.1742 -0.884 0.378
## CountryZAI -10.4600 15.3009 -0.684 0.495
## CountryMOZ -7.4600 13.2510 -0.563 0.574
## CountryMLI -10.4600 11.1159 -0.941 0.348
## CountryKEN 4.1633 11.2612 0.370 0.712
##
## (Dispersion parameter for gaussian family taken to be 117.0589)
##
## Null deviance: 21742 on 155 degrees of freedom
## Residual deviance: 16505 on 141 degrees of freedom
## AIC: 1201.9
##
## Number of Fisher Scoring iterations: 2

data$Country <- relevel(data$Country, ref= "KEN")
model1<-glm((Prev_Tsg) ~ Country,data=data, family=gaussian())
summary(model1)

##
## Call:
## glm(formula = (Prev_Tsg) ~ Country, family = gaussian(), data = data)
##
## Deviance Residuals:
## Min 1Q Median 3Q Max
## -16.34 -4.28 0.00 0.00 57.34
##
## Coefficients:
## Estimate Std. Error t value Pr(>|t|)
## (Intercept) 14.623 3.123 4.682 6.6e-06 ***
## CountryETH -4.163 11.261 -0.370 0.712155
## CountryGUI -14.623 4.190 -3.490 0.000645 ***
## CountryGHA -14.623 4.032 -3.627 0.000400 ***
## CountryBKF -10.344 3.532 -2.928 0.003976 **
## CountryZIM 1.720 4.633 0.371 0.711037
## CountryZAM 20.307 11.261 1.803 0.073485 .
## CountrySAF -3.930 4.938 -0.796 0.427528
## CountryUGA -9.595 5.759 -1.666 0.097908 .
## CountryURT -7.820 5.410 -1.446 0.150521
## CountrySWA -14.623 11.261 -1.299 0.196214
## CountrySEN -14.038 4.190 -3.350 0.001037 **
## CountryZAI -14.623 11.261 -1.299 0.196214
## CountryMOZ -11.623 8.263 -1.407 0.161747
## CountryMLI -14.623 4.032 -3.627 0.000400 ***
## ---
## Signif. codes: 0 '***' 0.001 '**' 0.01 '*' 0.05 '.' 0.1 ' ' 1
##
## (Dispersion parameter for gaussian family taken to be 117.0589)
##
## Null deviance: 21742 on 155 degrees of freedom
## Residual deviance: 16505 on 141 degrees of freedom
## AIC: 1201.9
##
## Number of Fisher Scoring iterations: 2

data$Country <- relevel(data$Country, ref= "MLI")
model1<-glm((Prev_Tsg) ~ Country,data=data, family=gaussian())
summary(model1)

##
## Call:
## glm(formula = (Prev_Tsg) ~ Country, family = gaussian(), data = data)
##
## Deviance Residuals:
## Min 1Q Median 3Q Max
## -16.34 -4.28 0.00 0.00 57.34
##
## Coefficients:
## Estimate Std. Error t value Pr(>|t|)
## (Intercept) 1.365e-14 2.550e+00 0.000 1.000000
## CountryKEN 1.462e+01 4.032e+00 3.627 0.000400 ***
## CountryETH 1.046e+01 1.112e+01 0.941 0.348315
## CountryGUI -3.449e-15 3.782e+00 0.000 1.000000
## CountryGHA -3.839e-15 3.606e+00 0.000 1.000000
## CountryBKF 4.280e+00 3.037e+00 1.409 0.161025
## CountryZIM 1.634e+01 4.267e+00 3.830 0.000192 ***
## CountryZAM 3.493e+01 1.112e+01 3.142 0.002043 **
## CountrySAF 1.069e+01 4.597e+00 2.326 0.021441 *
## CountryUGA 5.028e+00 5.469e+00 0.919 0.359516
## CountryURT 6.803e+00 5.100e+00 1.334 0.184385
## CountrySWA -2.645e-15 1.112e+01 0.000 1.000000
## CountrySEN 5.853e-01 3.782e+00 0.155 0.877241
## CountryZAI 3.185e-15 1.112e+01 0.000 1.000000
## CountryMOZ 3.000e+00 8.064e+00 0.372 0.710444
## ---
## Signif. codes: 0 '***' 0.001 '**' 0.01 '*' 0.05 '.' 0.1 ' ' 1
##
## (Dispersion parameter for gaussian family taken to be 117.0589)
##
## Null deviance: 21742 on 155 degrees of freedom
## Residual deviance: 16505 on 141 degrees of freedom
## AIC: 1201.9
##
## Number of Fisher Scoring iterations: 2

data$Country <- relevel(data$Country, ref= "MOZ")
model1<-glm((Prev_Tsg) ~ Country,data=data, family=gaussian())
summary(model1)

##
## Call:
## glm(formula = (Prev_Tsg) ~ Country, family = gaussian(), data = data)
##
## Deviance Residuals:
## Min 1Q Median 3Q Max
## -16.34 -4.28 0.00 0.00 57.34
##
## Coefficients:
## Estimate Std. Error t value Pr(>|t|)
## (Intercept) 3.000 7.650 0.392 0.6956
## CountryMLI -3.000 8.064 -0.372 0.7104
## CountryKEN 11.623 8.263 1.407 0.1617
## CountryETH 7.460 13.251 0.563 0.5743
## CountryGUI -3.000 8.145 -0.368 0.7132
## CountryGHA -3.000 8.064 -0.372 0.7104
## CountryBKF 1.280 7.826 0.164 0.8703
## CountryZIM 13.343 8.381 1.592 0.1136
## CountryZAM 31.930 13.251 2.410 0.0173 *
## CountrySAF 7.694 8.553 0.899 0.3699
## CountryUGA 2.028 9.052 0.224 0.8231
## CountryURT 3.803 8.834 0.431 0.6675
## CountrySWA -3.000 13.251 -0.226 0.8212
## CountrySEN -2.415 8.145 -0.296 0.7673
## CountryZAI -3.000 13.251 -0.226 0.8212
## ---
## Signif. codes: 0 '***' 0.001 '**' 0.01 '*' 0.05 '.' 0.1 ' ' 1
##
## (Dispersion parameter for gaussian family taken to be 117.0589)
##
## Null deviance: 21742 on 155 degrees of freedom
## Residual deviance: 16505 on 141 degrees of freedom
## AIC: 1201.9
##
## Number of Fisher Scoring iterations: 2

data$Country <- relevel(data$Country, ref= "ZAI")
model1<-glm((Prev_Tsg) ~ Country,data=data, family=gaussian())
summary(model1)

##
## Call:
## glm(formula = (Prev_Tsg) ~ Country, family = gaussian(), data = data)
##
## Deviance Residuals:
## Min 1Q Median 3Q Max
## -16.34 -4.28 0.00 0.00 57.34
##
## Coefficients:
## Estimate Std. Error t value Pr(>|t|)
## (Intercept) -4.883e-14 1.082e+01 0.000 1.0000
## CountryMOZ 3.000e+00 1.325e+01 0.226 0.8212
## CountryMLI 4.522e-14 1.112e+01 0.000 1.0000
## CountryKEN 1.462e+01 1.126e+01 1.299 0.1962
## CountryETH 1.046e+01 1.530e+01 0.684 0.4953
## CountryGUI 4.630e-14 1.117e+01 0.000 1.0000
## CountryGHA 3.256e-14 1.112e+01 0.000 1.0000
## CountryBKF 4.280e+00 1.094e+01 0.391 0.6964
## CountryZIM 1.634e+01 1.135e+01 1.440 0.1520
## CountryZAM 3.493e+01 1.530e+01 2.283 0.0239 *
## CountrySAF 1.069e+01 1.148e+01 0.932 0.3530
## CountryUGA 5.028e+00 1.185e+01 0.424 0.6720
## CountryURT 6.803e+00 1.169e+01 0.582 0.5614
## CountrySWA 6.981e-14 1.530e+01 0.000 1.0000
## CountrySEN 5.853e-01 1.117e+01 0.052 0.9583
## ---
## Signif. codes: 0 '***' 0.001 '**' 0.01 '*' 0.05 '.' 0.1 ' ' 1
##
## (Dispersion parameter for gaussian family taken to be 117.0589)
##
## Null deviance: 21742 on 155 degrees of freedom
## Residual deviance: 16505 on 141 degrees of freedom
## AIC: 1201.9
##
## Number of Fisher Scoring iterations: 2

data$Country <- relevel(data$Country, ref= "SEN")
model1<-glm((Prev_Tsg) ~ Country,data=data, family=gaussian())
summary(model1)

##
## Call:
## glm(formula = (Prev_Tsg) ~ Country, family = gaussian(), data = data)
##
## Deviance Residuals:
## Min 1Q Median 3Q Max
## -16.34 -4.28 0.00 0.00 57.34
##
## Coefficients:
## Estimate Std. Error t value Pr(>|t|)
## (Intercept) 0.5853 2.7936 0.210 0.834337
## CountryZAI -0.5853 11.1742 -0.052 0.958298
## CountryMOZ 2.4147 8.1445 0.296 0.767302
## CountryMLI -0.5853 3.7825 -0.155 0.877241
## CountryKEN 14.0380 4.1903 3.350 0.001037 **
## CountryETH 9.8747 11.1742 0.884 0.378361
## CountryGUI -0.5853 3.9507 -0.148 0.882428
## CountryGHA -0.5853 3.7825 -0.155 0.877241
## CountryBKF 3.6944 3.2444 1.139 0.256757
## CountryZIM 15.7577 4.4170 3.568 0.000493 ***
## CountryZAM 34.3447 11.1742 3.074 0.002540 **
## CountrySAF 10.1084 4.7367 2.134 0.034568 *
## CountryUGA 4.4427 5.5871 0.795 0.427854
## CountryURT 6.2180 5.2263 1.190 0.236140
## CountrySWA -0.5853 11.1742 -0.052 0.958298
## ---
## Signif. codes: 0 '***' 0.001 '**' 0.01 '*' 0.05 '.' 0.1 ' ' 1
##
## (Dispersion parameter for gaussian family taken to be 117.0589)
##
## Null deviance: 21742 on 155 degrees of freedom
## Residual deviance: 16505 on 141 degrees of freedom
## AIC: 1201.9
##
## Number of Fisher Scoring iterations: 2

data$Country <- relevel(data$Country, ref= "SWA")
model1<-glm((Prev_Tsg) ~ Country,data=data, family=gaussian())
summary(model1)

##
## Call:
## glm(formula = (Prev_Tsg) ~ Country, family = gaussian(), data = data)
##
## Deviance Residuals:
## Min 1Q Median 3Q Max
## -16.34 -4.28 0.00 0.00 57.34
##
## Coefficients:
## Estimate Std. Error t value Pr(>|t|)
## (Intercept) 1.065e-13 1.082e+01 0.000 1.0000
## CountrySEN 5.853e-01 1.117e+01 0.052 0.9583
## CountryZAI -9.969e-14 1.530e+01 0.000 1.0000
## CountryMOZ 3.000e+00 1.325e+01 0.226 0.8212
## CountryMLI -1.289e-13 1.112e+01 0.000 1.0000
## CountryKEN 1.462e+01 1.126e+01 1.299 0.1962
## CountryETH 1.046e+01 1.530e+01 0.684 0.4953
## CountryGUI -2.022e-13 1.117e+01 0.000 1.0000
## CountryGHA -9.150e-14 1.112e+01 0.000 1.0000
## CountryBKF 4.280e+00 1.094e+01 0.391 0.6964
## CountryZIM 1.634e+01 1.135e+01 1.440 0.1520
## CountryZAM 3.493e+01 1.530e+01 2.283 0.0239 *
## CountrySAF 1.069e+01 1.148e+01 0.932 0.3530
## CountryUGA 5.028e+00 1.185e+01 0.424 0.6720
## CountryURT 6.803e+00 1.169e+01 0.582 0.5614
## ---
## Signif. codes: 0 '***' 0.001 '**' 0.01 '*' 0.05 '.' 0.1 ' ' 1
##
## (Dispersion parameter for gaussian family taken to be 117.0589)
##
## Null deviance: 21742 on 155 degrees of freedom
## Residual deviance: 16505 on 141 degrees of freedom
## AIC: 1201.9
##
## Number of Fisher Scoring iterations: 2

data$Country <- relevel(data$Country, ref= "URT")
model1<-glm((Prev_Tsg) ~ Country,data=data, family=gaussian())
summary(model1)

##
## Call:
## glm(formula = (Prev_Tsg) ~ Country, family = gaussian(), data = data)
##
## Deviance Residuals:
## Min 1Q Median 3Q Max
## -16.34 -4.28 0.00 0.00 57.34
##
## Coefficients:
## Estimate Std. Error t value Pr(>|t|)
## (Intercept) 6.803 4.417 1.540 0.1257
## CountrySWA -6.803 11.686 -0.582 0.5614
## CountrySEN -6.218 5.226 -1.190 0.2361
## CountryZAI -6.803 11.686 -0.582 0.5614
## CountryMOZ -3.803 8.834 -0.431 0.6675
## CountryMLI -6.803 5.100 -1.334 0.1844
## CountryKEN 7.820 5.410 1.446 0.1505
## CountryETH 3.657 11.686 0.313 0.7548
## CountryGUI -6.803 5.226 -1.302 0.1951
## CountryGHA -6.803 5.100 -1.334 0.1844
## CountryBKF -2.524 4.715 -0.535 0.5933
## CountryZIM 9.540 5.587 1.707 0.0899 .
## CountryZAM 28.127 11.686 2.407 0.0174 *
## CountrySAF 3.890 5.843 0.666 0.5066
## CountryUGA -1.775 6.551 -0.271 0.7868
## ---
## Signif. codes: 0 '***' 0.001 '**' 0.01 '*' 0.05 '.' 0.1 ' ' 1
##
## (Dispersion parameter for gaussian family taken to be 117.0589)
##
## Null deviance: 21742 on 155 degrees of freedom
## Residual deviance: 16505 on 141 degrees of freedom
## AIC: 1201.9
##
## Number of Fisher Scoring iterations: 2

data$Country <- relevel(data$Country, ref= "UGA")
model1<-glm((Prev_Tsg) ~ Country,data=data, family=gaussian())
summary(model1)

##
## Call:
## glm(formula = (Prev_Tsg) ~ Country, family = gaussian(), data = data)
##
## Deviance Residuals:
## Min 1Q Median 3Q Max
## -16.34 -4.28 0.00 0.00 57.34
##
## Coefficients:
## Estimate Std. Error t value Pr(>|t|)
## (Intercept) 5.0280 4.8386 1.039 0.3005
## CountryURT 1.7753 6.5515 0.271 0.7868
## CountrySWA -5.0280 11.8520 -0.424 0.6720
## CountrySEN -4.4427 5.5871 -0.795 0.4279
## CountryZAI -5.0280 11.8520 -0.424 0.6720
## CountryMOZ -2.0280 9.0521 -0.224 0.8231
## CountryMLI -5.0280 5.4695 -0.919 0.3595
## CountryKEN 9.5953 5.7591 1.666 0.0979 .
## CountryETH 5.4320 11.8520 0.458 0.6474
## CountryGUI -5.0280 5.5871 -0.900 0.3697
## CountryGHA -5.0280 5.4695 -0.919 0.3595
## CountryBKF -0.7482 5.1122 -0.146 0.8838
## CountryZIM 11.3150 5.9260 1.909 0.0582 .
## CountryZAM 29.9020 11.8520 2.523 0.0127 *
## CountrySAF 5.6658 6.1680 0.919 0.3599
## ---
## Signif. codes: 0 '***' 0.001 '**' 0.01 '*' 0.05 '.' 0.1 ' ' 1
##
## (Dispersion parameter for gaussian family taken to be 117.0589)
##
## Null deviance: 21742 on 155 degrees of freedom
## Residual deviance: 16505 on 141 degrees of freedom
## AIC: 1201.9
##
## Number of Fisher Scoring iterations: 2

data$Country <- relevel(data$Country, ref= "SAF")
model1<-glm((Prev_Tsg) ~ Country,data=data, family=gaussian())
summary(model1)

##
## Call:
## glm(formula = (Prev_Tsg) ~ Country, family = gaussian(), data = data)
##
## Deviance Residuals:
## Min 1Q Median 3Q Max
## -16.34 -4.28 0.00 0.00 57.34
##
## Coefficients:
## Estimate Std. Error t value Pr(>|t|)
## (Intercept) 10.6938 3.8252 2.796 0.0059 **
## CountryUGA -5.6658 6.1680 -0.919 0.3599
## CountryURT -3.8904 5.8431 -0.666 0.5066
## CountrySWA -10.6938 11.4757 -0.932 0.3530
## CountrySEN -10.1084 4.7367 -2.134 0.0346 *
## CountryZAI -10.6937 11.4757 -0.932 0.3530
## CountryMOZ -7.6937 8.5535 -0.899 0.3699
## CountryMLI -10.6937 4.5974 -2.326 0.0214 *
## CountryKEN 3.9296 4.9383 0.796 0.4275
## CountryETH -0.2337 11.4757 -0.020 0.9838
## CountryGUI -10.6938 4.7367 -2.258 0.0255 *
## CountryGHA -10.6938 4.5974 -2.326 0.0214 *
## CountryBKF -6.4140 4.1659 -1.540 0.1259
## CountryZIM 5.6492 5.1321 1.101 0.2729
## CountryZAM 24.2362 11.4757 2.112 0.0365 *
## ---
## Signif. codes: 0 '***' 0.001 '**' 0.01 '*' 0.05 '.' 0.1 ' ' 1
##
## (Dispersion parameter for gaussian family taken to be 117.0589)
##
## Null deviance: 21742 on 155 degrees of freedom
## Residual deviance: 16505 on 141 degrees of freedom
## AIC: 1201.9
##
## Number of Fisher Scoring iterations: 2

data$Country <- relevel(data$Country, ref= "ZAM")
model1<-glm((Prev_Tsg) ~ Country,data=data, family=gaussian())
summary(model1)

##
## Call:
## glm(formula = (Prev_Tsg) ~ Country, family = gaussian(), data = data)
##
## Deviance Residuals:
## Min 1Q Median 3Q Max
## -16.34 -4.28 0.00 0.00 57.34
##
## Coefficients:
## Estimate Std. Error t value Pr(>|t|)
## (Intercept) 34.93 10.82 3.228 0.00155 **
## CountrySAF -24.24 11.48 -2.112 0.03645 *
## CountryUGA -29.90 11.85 -2.523 0.01275 *
## CountryURT -28.13 11.69 -2.407 0.01739 *
## CountrySWA -34.93 15.30 -2.283 0.02393 *
## CountrySEN -34.34 11.17 -3.074 0.00254 **
## CountryZAI -34.93 15.30 -2.283 0.02393 *
## CountryMOZ -31.93 13.25 -2.410 0.01726 *
## CountryMLI -34.93 11.12 -3.142 0.00204 **
## CountryKEN -20.31 11.26 -1.803 0.07348 .
## CountryETH -24.47 15.30 -1.599 0.11200
## CountryGUI -34.93 11.17 -3.126 0.00215 **
## CountryGHA -34.93 11.12 -3.142 0.00204 **
## CountryBKF -30.65 10.94 -2.801 0.00582 **
## CountryZIM -18.59 11.35 -1.638 0.10365
## ---
## Signif. codes: 0 '***' 0.001 '**' 0.01 '*' 0.05 '.' 0.1 ' ' 1
##
## (Dispersion parameter for gaussian family taken to be 117.0589)
##
## Null deviance: 21742 on 155 degrees of freedom
## Residual deviance: 16505 on 141 degrees of freedom
## AIC: 1201.9
##
## Number of Fisher Scoring iterations: 2

data$Country <- relevel(data$Country, ref= "ZIM")
model1<-glm((Prev_Tsg) ~ Country,data=data, family=gaussian())
summary(model1)

##
## Call:
## glm(formula = (Prev_Tsg) ~ Country, family = gaussian(), data = data)
##
## Deviance Residuals:
## Min 1Q Median 3Q Max
## -16.34 -4.28 0.00 0.00 57.34
##
## Coefficients:
## Estimate Std. Error t value Pr(>|t|)
## (Intercept) 16.343 3.421 4.777 4.42e-06 ***
## CountryZAM 18.587 11.347 1.638 0.103654
## CountrySAF -5.649 5.132 -1.101 0.272872
## CountryUGA -11.315 5.926 -1.909 0.058245 .
## CountryURT -9.540 5.587 -1.707 0.089940 .
## CountrySWA -16.343 11.347 -1.440 0.152018
## CountrySEN -15.758 4.417 -3.568 0.000493 ***
## CountryZAI -16.343 11.347 -1.440 0.152018
## CountryMOZ -13.343 8.381 -1.592 0.113597
## CountryMLI -16.343 4.267 -3.830 0.000192 ***
## CountryKEN -1.720 4.633 -0.371 0.711037
## CountryETH -5.883 11.347 -0.518 0.604963
## CountryGUI -16.343 4.417 -3.700 0.000308 ***
## CountryGHA -16.343 4.267 -3.830 0.000192 ***
## CountryBKF -12.063 3.798 -3.176 0.001835 **
## ---
## Signif. codes: 0 '***' 0.001 '**' 0.01 '*' 0.05 '.' 0.1 ' ' 1
##
## (Dispersion parameter for gaussian family taken to be 117.0589)
##
## Null deviance: 21742 on 155 degrees of freedom
## Residual deviance: 16505 on 141 degrees of freedom
## AIC: 1201.9
##
## Number of Fisher Scoring iterations: 2

#======== Glm TcTv per country
data$Country <- relevel(data$Country, ref= "BKF")
model1<-glm((Prev_TcTv) ~ Country,data=data, family=gaussian())
summary(model1)

##
## Call:
## glm(formula = (Prev_TcTv) ~ Country, family = gaussian(), data = data)
##
## Deviance Residuals:
## Min 1Q Median 3Q Max
## -2.0450 -0.2163 0.0000 0.0000 7.9550
##
## Coefficients:
## Estimate Std. Error t value Pr(>|t|)
## (Intercept) 0.21628 0.16487 1.312 0.192
## CountryZIM -0.21628 0.37956 -0.570 0.570
## CountryZAM -0.21628 1.09363 -0.198 0.844
## CountrySAF 0.01997 0.41628 0.048 0.962
## CountryUGA -0.21628 0.51083 -0.423 0.673
## CountryURT -0.21628 0.47116 -0.459 0.647
## CountrySWA -0.21628 1.09363 -0.198 0.844
## CountrySEN -0.21628 0.32420 -0.667 0.506
## CountryZAI -0.21628 1.09363 -0.198 0.844
## CountryMOZ -0.21628 0.78205 -0.277 0.783
## CountryMLI -0.21628 0.30351 -0.713 0.477
## CountryKEN 1.82872 0.35297 5.181 7.48e-07 ***
## CountryETH -0.21628 1.09363 -0.198 0.844
## CountryGUI -0.21628 0.32420 -0.667 0.506
## CountryGHA -0.21628 0.30351 -0.713 0.477
## ---
## Signif. codes: 0 '***' 0.001 '**' 0.01 '*' 0.05 '.' 0.1 ' ' 1
##
## (Dispersion parameter for gaussian family taken to be 1.168838)
##
## Null deviance: 209.26 on 155 degrees of freedom
## Residual deviance: 164.81 on 141 degrees of freedom
## AIC: 483.28
##
## Number of Fisher Scoring iterations: 2

data$Country <- relevel(data$Country, ref= "GHA")
model1<-glm((Prev_TcTv) ~ Country,data=data, family=gaussian())
summary(model1)

##
## Call:
## glm(formula = (Prev_TcTv) ~ Country, family = gaussian(), data = data)
##
## Deviance Residuals:
## Min 1Q Median 3Q Max
## -2.0450 -0.2163 0.0000 0.0000 7.9550
##
## Coefficients:
## Estimate Std. Error t value Pr(>|t|)
## (Intercept) -1.004e-15 2.548e-01 0.000 1.000
## CountryBKF 2.163e-01 3.035e-01 0.713 0.477
## CountryZIM 2.887e-15 4.264e-01 0.000 1.000
## CountryZAM 5.090e-16 1.111e+00 0.000 1.000
## CountrySAF 2.363e-01 4.594e-01 0.514 0.608
## CountryUGA -5.441e-15 5.465e-01 0.000 1.000
## CountryURT 2.003e-15 5.096e-01 0.000 1.000
## CountrySWA 2.463e-15 1.111e+00 0.000 1.000
## CountrySEN 1.552e-15 3.780e-01 0.000 1.000
## CountryZAI 2.394e-15 1.111e+00 0.000 1.000
## CountryMOZ 2.004e-15 8.058e-01 0.000 1.000
## CountryMLI 1.173e-15 3.604e-01 0.000 1.000
## CountryKEN 2.045e+00 4.029e-01 5.076 1.2e-06 ***
## CountryETH 4.605e-15 1.111e+00 0.000 1.000
## CountryGUI 1.950e-15 3.780e-01 0.000 1.000
## ---
## Signif. codes: 0 '***' 0.001 '**' 0.01 '*' 0.05 '.' 0.1 ' ' 1
##
## (Dispersion parameter for gaussian family taken to be 1.168838)
##
## Null deviance: 209.26 on 155 degrees of freedom
## Residual deviance: 164.81 on 141 degrees of freedom
## AIC: 483.28
##
## Number of Fisher Scoring iterations: 2

data$Country <- relevel(data$Country, ref= "GUI")
model1<-glm((Prev_TcTv) ~ Country,data=data, family=gaussian())
summary(model1)

##
## Call:
## glm(formula = (Prev_TcTv) ~ Country, family = gaussian(), data = data)
##
## Deviance Residuals:
## Min 1Q Median 3Q Max
## -2.0450 -0.2163 0.0000 0.0000 7.9550
##
## Coefficients:
## Estimate Std. Error t value Pr(>|t|)
## (Intercept) 4.237e-15 2.791e-01 0.000 1.000
## CountryGHA -4.980e-15 3.780e-01 0.000 1.000
## CountryBKF 2.163e-01 3.242e-01 0.667 0.506
## CountryZIM -3.309e-15 4.414e-01 0.000 1.000
## CountryZAM 2.952e-14 1.117e+00 0.000 1.000
## CountrySAF 2.362e-01 4.733e-01 0.499 0.618
## CountryUGA -6.271e-15 5.583e-01 0.000 1.000
## CountryURT -6.890e-15 5.222e-01 0.000 1.000
## CountrySWA -1.534e-14 1.117e+00 0.000 1.000
## CountrySEN -3.293e-15 3.948e-01 0.000 1.000
## CountryZAI -6.731e-15 1.117e+00 0.000 1.000
## CountryMOZ -1.760e-15 8.138e-01 0.000 1.000
## CountryMLI -4.293e-15 3.780e-01 0.000 1.000
## CountryKEN 2.045e+00 4.187e-01 4.884 2.78e-06 ***
## CountryETH 2.007e-15 1.117e+00 0.000 1.000
## ---
## Signif. codes: 0 '***' 0.001 '**' 0.01 '*' 0.05 '.' 0.1 ' ' 1
##
## (Dispersion parameter for gaussian family taken to be 1.168838)
##
## Null deviance: 209.26 on 155 degrees of freedom
## Residual deviance: 164.81 on 141 degrees of freedom
## AIC: 483.28
##
## Number of Fisher Scoring iterations: 2

data$Country <- relevel(data$Country, ref= "ETH")
model1<-glm((Prev_TcTv) ~ Country,data=data, family=gaussian())
summary(model1)

##
## Call:
## glm(formula = (Prev_TcTv) ~ Country, family = gaussian(), data = data)
##
## Deviance Residuals:
## Min 1Q Median 3Q Max
## -2.0450 -0.2163 0.0000 0.0000 7.9550
##
## Coefficients:
## Estimate Std. Error t value Pr(>|t|)
## (Intercept) -1.162e-14 1.081e+00 0.000 1.0000
## CountryGUI 1.175e-14 1.117e+00 0.000 1.0000
## CountryGHA 1.184e-14 1.111e+00 0.000 1.0000
## CountryBKF 2.163e-01 1.094e+00 0.198 0.8435
## CountryZIM 1.329e-14 1.134e+00 0.000 1.0000
## CountryZAM 2.493e-14 1.529e+00 0.000 1.0000
## CountrySAF 2.363e-01 1.147e+00 0.206 0.8371
## CountryUGA 1.201e-14 1.184e+00 0.000 1.0000
## CountryURT 1.389e-14 1.168e+00 0.000 1.0000
## CountrySWA 1.166e-14 1.529e+00 0.000 1.0000
## CountrySEN 1.064e-14 1.117e+00 0.000 1.0000
## CountryZAI 9.636e-15 1.529e+00 0.000 1.0000
## CountryMOZ 1.229e-14 1.324e+00 0.000 1.0000
## CountryMLI 1.196e-14 1.111e+00 0.000 1.0000
## CountryKEN 2.045e+00 1.125e+00 1.817 0.0713 .
## ---
## Signif. codes: 0 '***' 0.001 '**' 0.01 '*' 0.05 '.' 0.1 ' ' 1
##
## (Dispersion parameter for gaussian family taken to be 1.168838)
##
## Null deviance: 209.26 on 155 degrees of freedom
## Residual deviance: 164.81 on 141 degrees of freedom
## AIC: 483.28
##
## Number of Fisher Scoring iterations: 2

data$Country <- relevel(data$Country, ref= "KEN")
model1<-glm((Prev_TcTv) ~ Country,data=data, family=gaussian())
summary(model1)

##
## Call:
## glm(formula = (Prev_TcTv) ~ Country, family = gaussian(), data = data)
##
## Deviance Residuals:
## Min 1Q Median 3Q Max
## -2.0450 -0.2163 0.0000 0.0000 7.9550
##
## Coefficients:
## Estimate Std. Error t value Pr(>|t|)
## (Intercept) 2.0450 0.3121 6.552 9.86e-10 ***
## CountryETH -2.0450 1.1253 -1.817 0.071289 .
## CountryGUI -2.0450 0.4187 -4.884 2.78e-06 ***
## CountryGHA -2.0450 0.4029 -5.076 1.20e-06 ***
## CountryBKF -1.8287 0.3530 -5.181 7.48e-07 ***
## CountryZIM -2.0450 0.4629 -4.418 1.97e-05 ***
## CountryZAM -2.0450 1.1253 -1.817 0.071289 .
## CountrySAF -1.8087 0.4935 -3.665 0.000349 ***
## CountryUGA -2.0450 0.5755 -3.554 0.000517 ***
## CountryURT -2.0450 0.5406 -3.783 0.000228 ***
## CountrySWA -2.0450 1.1253 -1.817 0.071289 .
## CountrySEN -2.0450 0.4187 -4.884 2.78e-06 ***
## CountryZAI -2.0450 1.1253 -1.817 0.071289 .
## CountryMOZ -2.0450 0.8257 -2.477 0.014446 *
## CountryMLI -2.0450 0.4029 -5.076 1.20e-06 ***
## ---
## Signif. codes: 0 '***' 0.001 '**' 0.01 '*' 0.05 '.' 0.1 ' ' 1
##
## (Dispersion parameter for gaussian family taken to be 1.168838)
##
## Null deviance: 209.26 on 155 degrees of freedom
## Residual deviance: 164.81 on 141 degrees of freedom
## AIC: 483.28
##
## Number of Fisher Scoring iterations: 2

data$Country <- relevel(data$Country, ref= "MLI")
model1<-glm((Prev_TcTv) ~ Country,data=data, family=gaussian())
summary(model1)

##
## Call:
## glm(formula = (Prev_TcTv) ~ Country, family = gaussian(), data = data)
##
## Deviance Residuals:
## Min 1Q Median 3Q Max
## -2.0450 -0.2163 0.0000 0.0000 7.9550
##
## Coefficients:
## Estimate Std. Error t value Pr(>|t|)
## (Intercept) 1.333e-15 2.548e-01 0.000 1.000
## CountryKEN 2.045e+00 4.029e-01 5.076 1.2e-06 ***
## CountryETH -4.973e-15 1.111e+00 0.000 1.000
## CountryGUI -2.874e-16 3.780e-01 0.000 1.000
## CountryGHA 3.881e-15 3.604e-01 0.000 1.000
## CountryBKF 2.163e-01 3.035e-01 0.713 0.477
## CountryZIM -1.206e-15 4.264e-01 0.000 1.000
## CountryZAM -2.583e-15 1.111e+00 0.000 1.000
## CountrySAF 2.362e-01 4.594e-01 0.514 0.608
## CountryUGA -6.729e-16 5.465e-01 0.000 1.000
## CountryURT -2.343e-19 5.096e-01 0.000 1.000
## CountrySWA -2.345e-16 1.111e+00 0.000 1.000
## CountrySEN -1.728e-15 3.780e-01 0.000 1.000
## CountryZAI -6.743e-16 1.111e+00 0.000 1.000
## CountryMOZ -1.055e-15 8.058e-01 0.000 1.000
## ---
## Signif. codes: 0 '***' 0.001 '**' 0.01 '*' 0.05 '.' 0.1 ' ' 1
##
## (Dispersion parameter for gaussian family taken to be 1.168838)
##
## Null deviance: 209.26 on 155 degrees of freedom
## Residual deviance: 164.81 on 141 degrees of freedom
## AIC: 483.28
##
## Number of Fisher Scoring iterations: 2

data$Country <- relevel(data$Country, ref= "MOZ")
model1<-glm((Prev_TcTv) ~ Country,data=data, family=gaussian())
summary(model1)

##
## Call:
## glm(formula = (Prev_TcTv) ~ Country, family = gaussian(), data = data)
##
## Deviance Residuals:
## Min 1Q Median 3Q Max
## -2.0450 -0.2163 0.0000 0.0000 7.9550
##
## Coefficients:
## Estimate Std. Error t value Pr(>|t|)
## (Intercept) -1.042e-16 7.645e-01 0.000 1.0000
## CountryMLI -9.460e-16 8.058e-01 0.000 1.0000
## CountryKEN 2.045e+00 8.257e-01 2.477 0.0144 *
## CountryETH 1.538e-15 1.324e+00 0.000 1.0000
## CountryGUI -1.131e-14 8.138e-01 0.000 1.0000
## CountryGHA 2.303e-15 8.058e-01 0.000 1.0000
## CountryBKF 2.163e-01 7.820e-01 0.277 0.7825
## CountryZIM 1.313e-15 8.374e-01 0.000 1.0000
## CountryZAM 5.483e-16 1.324e+00 0.000 1.0000
## CountrySAF 2.363e-01 8.547e-01 0.276 0.7826
## CountryUGA -2.056e-16 9.045e-01 0.000 1.0000
## CountryURT 1.663e-15 8.827e-01 0.000 1.0000
## CountrySWA 9.890e-16 1.324e+00 0.000 1.0000
## CountrySEN 1.972e-15 8.138e-01 0.000 1.0000
## CountryZAI 5.439e-16 1.324e+00 0.000 1.0000
## ---
## Signif. codes: 0 '***' 0.001 '**' 0.01 '*' 0.05 '.' 0.1 ' ' 1
##
## (Dispersion parameter for gaussian family taken to be 1.168838)
##
## Null deviance: 209.26 on 155 degrees of freedom
## Residual deviance: 164.81 on 141 degrees of freedom
## AIC: 483.28
##
## Number of Fisher Scoring iterations: 2

data$Country <- relevel(data$Country, ref= "ZAI")
model1<-glm((Prev_TcTv) ~ Country,data=data, family=gaussian())
summary(model1)

##
## Call:
## glm(formula = (Prev_TcTv) ~ Country, family = gaussian(), data = data)
##
## Deviance Residuals:
## Min 1Q Median 3Q Max
## -2.0450 -0.2163 0.0000 0.0000 7.9550
##
## Coefficients:
## Estimate Std. Error t value Pr(>|t|)
## (Intercept) 5.182e-15 1.081e+00 0.000 1.0000
## CountryMOZ -7.572e-15 1.324e+00 0.000 1.0000
## CountryMLI -4.622e-15 1.111e+00 0.000 1.0000
## CountryKEN 2.045e+00 1.125e+00 1.817 0.0713 .
## CountryETH -3.152e-14 1.529e+00 0.000 1.0000
## CountryGUI -7.254e-15 1.117e+00 0.000 1.0000
## CountryGHA -4.887e-15 1.111e+00 0.000 1.0000
## CountryBKF 2.163e-01 1.094e+00 0.198 0.8435
## CountryZIM -5.336e-15 1.134e+00 0.000 1.0000
## CountryZAM 5.839e-16 1.529e+00 0.000 1.0000
## CountrySAF 2.362e-01 1.147e+00 0.206 0.8371
## CountryUGA -5.733e-15 1.184e+00 0.000 1.0000
## CountryURT -5.431e-15 1.168e+00 0.000 1.0000
## CountrySWA -7.103e-15 1.529e+00 0.000 1.0000
## CountrySEN -8.370e-15 1.117e+00 0.000 1.0000
## ---
## Signif. codes: 0 '***' 0.001 '**' 0.01 '*' 0.05 '.' 0.1 ' ' 1
##
## (Dispersion parameter for gaussian family taken to be 1.168838)
##
## Null deviance: 209.26 on 155 degrees of freedom
## Residual deviance: 164.81 on 141 degrees of freedom
## AIC: 483.28
##
## Number of Fisher Scoring iterations: 2

data$Country <- relevel(data$Country, ref= "SEN")
model1<-glm((Prev_TcTv) ~ Country,data=data, family=gaussian())
summary(model1)

##
## Call:
## glm(formula = (Prev_TcTv) ~ Country, family = gaussian(), data = data)
##
## Deviance Residuals:
## Min 1Q Median 3Q Max
## -2.0450 -0.2163 0.0000 0.0000 7.9550
##
## Coefficients:
## Estimate Std. Error t value Pr(>|t|)
## (Intercept) 1.988e-16 2.791e-01 0.000 1.000
## CountryZAI -4.742e-15 1.117e+00 0.000 1.000
## CountryMOZ -9.054e-16 8.138e-01 0.000 1.000
## CountryMLI 2.786e-17 3.780e-01 0.000 1.000
## CountryKEN 2.045e+00 4.187e-01 4.884 2.78e-06 ***
## CountryETH 1.336e-14 1.117e+00 0.000 1.000
## CountryGUI 1.923e-15 3.948e-01 0.000 1.000
## CountryGHA 2.425e-15 3.780e-01 0.000 1.000
## CountryBKF 2.163e-01 3.242e-01 0.667 0.506
## CountryZIM 2.211e-15 4.414e-01 0.000 1.000
## CountryZAM 3.167e-16 1.117e+00 0.000 1.000
## CountrySAF 2.363e-01 4.733e-01 0.499 0.618
## CountryUGA 2.782e-15 5.583e-01 0.000 1.000
## CountryURT 2.033e-15 5.222e-01 0.000 1.000
## CountrySWA 2.494e-15 1.117e+00 0.000 1.000
## ---
## Signif. codes: 0 '***' 0.001 '**' 0.01 '*' 0.05 '.' 0.1 ' ' 1
##
## (Dispersion parameter for gaussian family taken to be 1.168838)
##
## Null deviance: 209.26 on 155 degrees of freedom
## Residual deviance: 164.81 on 141 degrees of freedom
## AIC: 483.28
##
## Number of Fisher Scoring iterations: 2

data$Country <- relevel(data$Country, ref= "SWA")
model1<-glm((Prev_TcTv) ~ Country,data=data, family=gaussian())
summary(model1)

##
## Call:
## glm(formula = (Prev_TcTv) ~ Country, family = gaussian(), data = data)
##
## Deviance Residuals:
## Min 1Q Median 3Q Max
## -2.0450 -0.2163 0.0000 0.0000 7.9550
##
## Coefficients:
## Estimate Std. Error t value Pr(>|t|)
## (Intercept) 1.131e-14 1.081e+00 0.000 1.0000
## CountrySEN -1.177e-14 1.117e+00 0.000 1.0000
## CountryZAI -1.048e-14 1.529e+00 0.000 1.0000
## CountryMOZ -1.222e-14 1.324e+00 0.000 1.0000
## CountryMLI -1.773e-14 1.111e+00 0.000 1.0000
## CountryKEN 2.045e+00 1.125e+00 1.817 0.0713 .
## CountryETH -8.075e-15 1.529e+00 0.000 1.0000
## CountryGUI -8.970e-15 1.117e+00 0.000 1.0000
## CountryGHA -9.031e-15 1.111e+00 0.000 1.0000
## CountryBKF 2.163e-01 1.094e+00 0.198 0.8435
## CountryZIM -8.851e-15 1.134e+00 0.000 1.0000
## CountryZAM -6.940e-15 1.529e+00 0.000 1.0000
## CountrySAF 2.362e-01 1.147e+00 0.206 0.8371
## CountryUGA -8.357e-15 1.184e+00 0.000 1.0000
## CountryURT -8.574e-15 1.168e+00 0.000 1.0000
## ---
## Signif. codes: 0 '***' 0.001 '**' 0.01 '*' 0.05 '.' 0.1 ' ' 1
##
## (Dispersion parameter for gaussian family taken to be 1.168838)
##
## Null deviance: 209.26 on 155 degrees of freedom
## Residual deviance: 164.81 on 141 degrees of freedom
## AIC: 483.28
##
## Number of Fisher Scoring iterations: 2

data$Country <- relevel(data$Country, ref= "URT")
model1<-glm((Prev_TcTv) ~ Country,data=data, family=gaussian())
summary(model1)

##
## Call:
## glm(formula = (Prev_TcTv) ~ Country, family = gaussian(), data = data)
##
## Deviance Residuals:
## Min 1Q Median 3Q Max
## -2.0450 -0.2163 0.0000 0.0000 7.9550
##
## Coefficients:
## Estimate Std. Error t value Pr(>|t|)
## (Intercept) -8.621e-15 4.414e-01 0.000 1.000000
## CountrySWA 4.171e-15 1.168e+00 0.000 1.000000
## CountrySEN 9.215e-15 5.222e-01 0.000 1.000000
## CountryZAI 9.200e-15 1.168e+00 0.000 1.000000
## CountryMOZ 3.360e-15 8.827e-01 0.000 1.000000
## CountryMLI 7.216e-15 5.096e-01 0.000 1.000000
## CountryKEN 2.045e+00 5.406e-01 3.783 0.000228 ***
## CountryETH 5.840e-15 1.168e+00 0.000 1.000000
## CountryGUI 9.271e-15 5.222e-01 0.000 1.000000
## CountryGHA 9.174e-15 5.096e-01 0.000 1.000000
## CountryBKF 2.163e-01 4.712e-01 0.459 0.646913
## CountryZIM 8.736e-15 5.583e-01 0.000 1.000000
## CountryZAM 8.956e-15 1.168e+00 0.000 1.000000
## CountrySAF 2.363e-01 5.839e-01 0.405 0.686367
## CountryUGA 8.126e-15 6.547e-01 0.000 1.000000
## ---
## Signif. codes: 0 '***' 0.001 '**' 0.01 '*' 0.05 '.' 0.1 ' ' 1
##
## (Dispersion parameter for gaussian family taken to be 1.168838)
##
## Null deviance: 209.26 on 155 degrees of freedom
## Residual deviance: 164.81 on 141 degrees of freedom
## AIC: 483.28
##
## Number of Fisher Scoring iterations: 2

data$Country <- relevel(data$Country, ref= "UGA")
model1<-glm((Prev_TcTv) ~ Country,data=data, family=gaussian())
summary(model1)

##
## Call:
## glm(formula = (Prev_TcTv) ~ Country, family = gaussian(), data = data)
##
## Deviance Residuals:
## Min 1Q Median 3Q Max
## -2.0450 -0.2163 0.0000 0.0000 7.9550
##
## Coefficients:
## Estimate Std. Error t value Pr(>|t|)
## (Intercept) 2.629e-16 4.835e-01 0.000 1.000000
## CountryURT 1.053e-15 6.547e-01 0.000 1.000000
## CountrySWA -6.275e-16 1.184e+00 0.000 1.000000
## CountrySEN 9.718e-16 5.583e-01 0.000 1.000000
## CountryZAI 3.860e-14 1.184e+00 0.000 1.000000
## CountryMOZ 2.023e-15 9.045e-01 0.000 1.000000
## CountryMLI -5.353e-16 5.465e-01 0.000 1.000000
## CountryKEN 2.045e+00 5.755e-01 3.554 0.000517 ***
## CountryETH 1.094e-15 1.184e+00 0.000 1.000000
## CountryGUI -6.636e-16 5.583e-01 0.000 1.000000
## CountryGHA -1.739e-15 5.465e-01 0.000 1.000000
## CountryBKF 2.163e-01 5.108e-01 0.423 0.672659
## CountryZIM -7.119e-16 5.922e-01 0.000 1.000000
## CountryZAM -9.966e-15 1.184e+00 0.000 1.000000
## CountrySAF 2.362e-01 6.163e-01 0.383 0.702065
## ---
## Signif. codes: 0 '***' 0.001 '**' 0.01 '*' 0.05 '.' 0.1 ' ' 1
##
## (Dispersion parameter for gaussian family taken to be 1.168838)
##
## Null deviance: 209.26 on 155 degrees of freedom
## Residual deviance: 164.81 on 141 degrees of freedom
## AIC: 483.28
##
## Number of Fisher Scoring iterations: 2

data$Country <- relevel(data$Country, ref= "SAF")
model1<-glm((Prev_TcTv) ~ Country,data=data, family=gaussian())
summary(model1)

##
## Call:
## glm(formula = (Prev_TcTv) ~ Country, family = gaussian(), data = data)
##
## Deviance Residuals:
## Min 1Q Median 3Q Max
## -2.0450 -0.2163 0.0000 0.0000 7.9550
##
## Coefficients:
## Estimate Std. Error t value Pr(>|t|)
## (Intercept) 0.23625 0.38224 0.618 0.537524
## CountryUGA -0.23625 0.61634 -0.383 0.702065
## CountryURT -0.23625 0.58388 -0.405 0.686367
## CountrySWA -0.23625 1.14671 -0.206 0.837069
## CountrySEN -0.23625 0.47332 -0.499 0.618459
## CountryZAI -0.23625 1.14671 -0.206 0.837069
## CountryMOZ -0.23625 0.85471 -0.276 0.782637
## CountryMLI -0.23625 0.45939 -0.514 0.607870
## CountryKEN 1.80875 0.49347 3.665 0.000349 ***
## CountryETH -0.23625 1.14671 -0.206 0.837069
## CountryGUI -0.23625 0.47332 -0.499 0.618459
## CountryGHA -0.23625 0.45939 -0.514 0.607870
## CountryBKF -0.01997 0.41628 -0.048 0.961804
## CountryZIM -0.23625 0.51282 -0.461 0.645735
## CountryZAM -0.23625 1.14671 -0.206 0.837069
## ---
## Signif. codes: 0 '***' 0.001 '**' 0.01 '*' 0.05 '.' 0.1 ' ' 1
##
## (Dispersion parameter for gaussian family taken to be 1.168838)
##
## Null deviance: 209.26 on 155 degrees of freedom
## Residual deviance: 164.81 on 141 degrees of freedom
## AIC: 483.28
##
## Number of Fisher Scoring iterations: 2

data$Country <- relevel(data$Country, ref= "ZAM")
model1<-glm((Prev_TcTv) ~ Country,data=data, family=gaussian())
summary(model1)

##
## Call:
## glm(formula = (Prev_TcTv) ~ Country, family = gaussian(), data = data)
##
## Deviance Residuals:
## Min 1Q Median 3Q Max
## -2.0450 -0.2163 0.0000 0.0000 7.9550
##
## Coefficients:
## Estimate Std. Error t value Pr(>|t|)
## (Intercept) -3.848e-14 1.081e+00 0.000 1.0000
## CountrySAF 2.363e-01 1.147e+00 0.206 0.8371
## CountryUGA 3.913e-14 1.184e+00 0.000 1.0000
## CountryURT 3.890e-14 1.168e+00 0.000 1.0000
## CountrySWA 8.231e-15 1.529e+00 0.000 1.0000
## CountrySEN 3.836e-14 1.117e+00 0.000 1.0000
## CountryZAI 3.776e-14 1.529e+00 0.000 1.0000
## CountryMOZ 3.947e-14 1.324e+00 0.000 1.0000
## CountryMLI 3.869e-14 1.111e+00 0.000 1.0000
## CountryKEN 2.045e+00 1.125e+00 1.817 0.0713 .
## CountryETH 3.036e-14 1.529e+00 0.000 1.0000
## CountryGUI 3.866e-14 1.117e+00 0.000 1.0000
## CountryGHA 3.831e-14 1.111e+00 0.000 1.0000
## CountryBKF 2.163e-01 1.094e+00 0.198 0.8435
## CountryZIM 3.880e-14 1.134e+00 0.000 1.0000
## ---
## Signif. codes: 0 '***' 0.001 '**' 0.01 '*' 0.05 '.' 0.1 ' ' 1
##
## (Dispersion parameter for gaussian family taken to be 1.168838)
##
## Null deviance: 209.26 on 155 degrees of freedom
## Residual deviance: 164.81 on 141 degrees of freedom
## AIC: 483.28
##
## Number of Fisher Scoring iterations: 2

data$Country <- relevel(data$Country, ref= "ZIM")
model1<-glm((Prev_TcTv) ~ Country,data=data, family=gaussian())
summary(model1)

##
## Call:
## glm(formula = (Prev_TcTv) ~ Country, family = gaussian(), data = data)
##
## Deviance Residuals:
## Min 1Q Median 3Q Max
## -2.0450 -0.2163 0.0000 0.0000 7.9550
##
## Coefficients:
## Estimate Std. Error t value Pr(>|t|)
## (Intercept) 5.955e-15 3.419e-01 0.000 1.000
## CountryZAM -1.108e-14 1.134e+00 0.000 1.000
## CountrySAF 2.362e-01 5.128e-01 0.461 0.646
## CountryUGA -5.150e-15 5.922e-01 0.000 1.000
## CountryURT -2.163e-14 5.583e-01 0.000 1.000
## CountrySWA -1.589e-14 1.134e+00 0.000 1.000
## CountrySEN -5.951e-15 4.414e-01 0.000 1.000
## CountryZAI -1.082e-14 1.134e+00 0.000 1.000
## CountryMOZ -1.477e-14 8.374e-01 0.000 1.000
## CountryMLI -5.405e-15 4.264e-01 0.000 1.000
## CountryKEN 2.045e+00 4.629e-01 4.418 1.97e-05 ***
## CountryETH -6.762e-15 1.134e+00 0.000 1.000
## CountryGUI -5.751e-15 4.414e-01 0.000 1.000
## CountryGHA -5.573e-15 4.264e-01 0.000 1.000
## CountryBKF 2.163e-01 3.796e-01 0.570 0.570
## ---
## Signif. codes: 0 '***' 0.001 '**' 0.01 '*' 0.05 '.' 0.1 ' ' 1
##
## (Dispersion parameter for gaussian family taken to be 1.168838)
##
## Null deviance: 209.26 on 155 degrees of freedom
## Residual deviance: 164.81 on 141 degrees of freedom
## AIC: 483.28
##
## Number of Fisher Scoring iterations: 2

#======== Glm TcTz per country
data$Country <- relevel(data$Country, ref= "BKF")
model1<-glm((Prev_TcTz) ~ Country,data=data, family=gaussian())
summary(model1)

##
## Call:
## glm(formula = (Prev_TcTz) ~ Country, family = gaussian(), data = data)
##
## Deviance Residuals:
## Min 1Q Median 3Q Max
## -3.7894 -0.3586 0.0000 0.0000 18.4306
##
## Coefficients:
## Estimate Std. Error t value Pr(>|t|)
## (Intercept) 0.35860 0.40932 0.876 0.382
## CountryZIM -0.35860 0.94232 -0.381 0.704
## CountryZAM -0.35860 2.71512 -0.132 0.895
## CountrySAF -0.35860 1.03348 -0.347 0.729
## CountryUGA -0.35860 1.26823 -0.283 0.778
## CountryURT -0.12360 1.16973 -0.106 0.916
## CountrySWA -0.35860 2.71512 -0.132 0.895
## CountrySEN -0.35860 0.80488 -0.446 0.657
## CountryZAI -0.35860 2.71512 -0.132 0.895
## CountryMOZ -0.35860 1.94157 -0.185 0.854
## CountryMLI -0.35860 0.75351 -0.476 0.635
## CountryKEN -0.02444 0.87630 -0.028 0.978
## CountryETH -0.35860 2.71512 -0.132 0.895
## CountryGUI -0.35860 0.80488 -0.446 0.657
## CountryGHA 3.43084 0.75351 4.553 1.13e-05 ***
## ---
## Signif. codes: 0 '***' 0.001 '**' 0.01 '*' 0.05 '.' 0.1 ' ' 1
##
## (Dispersion parameter for gaussian family taken to be 7.204325)
##
## Null deviance: 1230.7 on 155 degrees of freedom
## Residual deviance: 1015.8 on 141 degrees of freedom
## AIC: 766.99
##
## Number of Fisher Scoring iterations: 2

data$Country <- relevel(data$Country, ref= "GHA")
model1<-glm((Prev_TcTz) ~ Country,data=data, family=gaussian())
summary(model1)

##
## Call:
## glm(formula = (Prev_TcTz) ~ Country, family = gaussian(), data = data)
##
## Deviance Residuals:
## Min 1Q Median 3Q Max
## -3.7894 -0.3586 0.0000 0.0000 18.4306
##
## Coefficients:
## Estimate Std. Error t value Pr(>|t|)
## (Intercept) 3.7894 0.6326 5.990 1.66e-08 ***
## CountryBKF -3.4308 0.7535 -4.553 1.13e-05 ***
## CountryZIM -3.7894 1.0586 -3.580 0.000472 ***
## CountryZAM -3.7894 2.7576 -1.374 0.171571
## CountrySAF -3.7894 1.1405 -3.323 0.001136 **
## CountryUGA -3.7894 1.3569 -2.793 0.005952 **
## CountryURT -3.5544 1.2653 -2.809 0.005672 **
## CountrySWA -3.7894 2.7576 -1.374 0.171571
## CountrySEN -3.7894 0.9384 -4.038 8.80e-05 ***
## CountryZAI -3.7894 2.7576 -1.374 0.171571
## CountryMOZ -3.7894 2.0006 -1.894 0.060253 .
## CountryMLI -3.7894 0.8947 -4.235 4.09e-05 ***
## CountryKEN -3.4553 1.0003 -3.454 0.000729 ***
## CountryETH -3.7894 2.7576 -1.374 0.171571
## CountryGUI -3.7894 0.9384 -4.038 8.80e-05 ***
## ---
## Signif. codes: 0 '***' 0.001 '**' 0.01 '*' 0.05 '.' 0.1 ' ' 1
##
## (Dispersion parameter for gaussian family taken to be 7.204325)
##
## Null deviance: 1230.7 on 155 degrees of freedom
## Residual deviance: 1015.8 on 141 degrees of freedom
## AIC: 766.99
##
## Number of Fisher Scoring iterations: 2

data$Country <- relevel(data$Country, ref= "GUI")
model1<-glm((Prev_TcTz) ~ Country,data=data, family=gaussian())
summary(model1)

##
## Call:
## glm(formula = (Prev_TcTz) ~ Country, family = gaussian(), data = data)
##
## Deviance Residuals:
## Min 1Q Median 3Q Max
## -3.7894 -0.3586 0.0000 0.0000 18.4306
##
## Coefficients:
## Estimate Std. Error t value Pr(>|t|)
## (Intercept) 1.209e-15 6.930e-01 0.000 1.000
## CountryGHA 3.789e+00 9.384e-01 4.038 8.8e-05 ***
## CountryBKF 3.586e-01 8.049e-01 0.446 0.657
## CountryZIM -2.041e-16 1.096e+00 0.000 1.000
## CountryZAM 5.004e-15 2.772e+00 0.000 1.000
## CountrySAF -4.096e-16 1.175e+00 0.000 1.000
## CountryUGA -5.811e-16 1.386e+00 0.000 1.000
## CountryURT 2.350e-01 1.297e+00 0.181 0.856
## CountrySWA -8.210e-16 2.772e+00 0.000 1.000
## CountrySEN -2.249e-16 9.801e-01 0.000 1.000
## CountryZAI 5.601e-16 2.772e+00 0.000 1.000
## CountryMOZ -5.156e-16 2.021e+00 0.000 1.000
## CountryMLI -3.186e-16 9.384e-01 0.000 1.000
## CountryKEN 3.342e-01 1.040e+00 0.321 0.748
## CountryETH -3.411e-15 2.772e+00 0.000 1.000
## ---
## Signif. codes: 0 '***' 0.001 '**' 0.01 '*' 0.05 '.' 0.1 ' ' 1
##
## (Dispersion parameter for gaussian family taken to be 7.204325)
##
## Null deviance: 1230.7 on 155 degrees of freedom
## Residual deviance: 1015.8 on 141 degrees of freedom
## AIC: 766.99
##
## Number of Fisher Scoring iterations: 2

data$Country <- relevel(data$Country, ref= "ETH")
model1<-glm((Prev_TcTz) ~ Country,data=data, family=gaussian())
summary(model1)

##
## Call:
## glm(formula = (Prev_TcTz) ~ Country, family = gaussian(), data = data)
##
## Deviance Residuals:
## Min 1Q Median 3Q Max
## -3.7894 -0.3586 0.0000 0.0000 18.4306
##
## Coefficients:
## Estimate Std. Error t value Pr(>|t|)
## (Intercept) -1.535e-16 2.684e+00 0.000 1.000
## CountryGUI 3.075e-15 2.772e+00 0.000 1.000
## CountryGHA 3.789e+00 2.758e+00 1.374 0.172
## CountryBKF 3.586e-01 2.715e+00 0.132 0.895
## CountryZIM 1.333e-15 2.815e+00 0.000 1.000
## CountryZAM 1.441e-15 3.796e+00 0.000 1.000
## CountrySAF -7.151e-16 2.847e+00 0.000 1.000
## CountryUGA -2.882e-16 2.940e+00 0.000 1.000
## CountryURT 2.350e-01 2.899e+00 0.081 0.936
## CountrySWA -1.979e-15 3.796e+00 0.000 1.000
## CountrySEN -8.517e-16 2.772e+00 0.000 1.000
## CountryZAI -1.156e-15 3.796e+00 0.000 1.000
## CountryMOZ 1.420e-15 3.287e+00 0.000 1.000
## CountryMLI -7.274e-16 2.758e+00 0.000 1.000
## CountryKEN 3.342e-01 2.794e+00 0.120 0.905
##
## (Dispersion parameter for gaussian family taken to be 7.204325)
##
## Null deviance: 1230.7 on 155 degrees of freedom
## Residual deviance: 1015.8 on 141 degrees of freedom
## AIC: 766.99
##
## Number of Fisher Scoring iterations: 2

data$Country <- relevel(data$Country, ref= "KEN")
model1<-glm((Prev_TcTz) ~ Country,data=data, family=gaussian())
summary(model1)

##
## Call:
## glm(formula = (Prev_TcTz) ~ Country, family = gaussian(), data = data)
##
## Deviance Residuals:
## Min 1Q Median 3Q Max
## -3.7894 -0.3586 0.0000 0.0000 18.4306
##
## Coefficients:
## Estimate Std. Error t value Pr(>|t|)
## (Intercept) 0.33417 0.77483 0.431 0.666925
## CountryETH -0.33417 2.79369 -0.120 0.904958
## CountryGUI -0.33417 1.03954 -0.321 0.748341
## CountryGHA 3.45528 1.00030 3.454 0.000729 ***
## CountryBKF 0.02444 0.87630 0.028 0.977791
## CountryZIM -0.33417 1.14926 -0.291 0.771656
## CountryZAM -0.33417 2.79369 -0.120 0.904958
## CountrySAF -0.33417 1.22511 -0.273 0.785434
## CountryUGA -0.33417 1.42871 -0.234 0.815407
## CountryURT -0.09917 1.34204 -0.074 0.941201
## CountrySWA -0.33417 2.79369 -0.120 0.904958
## CountrySEN -0.33417 1.03954 -0.321 0.748341
## CountryZAI -0.33417 2.79369 -0.120 0.904958
## CountryMOZ -0.33417 2.05001 -0.163 0.870746
## CountryMLI -0.33417 1.00030 -0.334 0.738826
## ---
## Signif. codes: 0 '***' 0.001 '**' 0.01 '*' 0.05 '.' 0.1 ' ' 1
##
## (Dispersion parameter for gaussian family taken to be 7.204325)
##
## Null deviance: 1230.7 on 155 degrees of freedom
## Residual deviance: 1015.8 on 141 degrees of freedom
## AIC: 766.99
##
## Number of Fisher Scoring iterations: 2

data$Country <- relevel(data$Country, ref= "MLI")
model1<-glm((Prev_TcTz) ~ Country,data=data, family=gaussian())
summary(model1)

##
## Call:
## glm(formula = (Prev_TcTz) ~ Country, family = gaussian(), data = data)
##
## Deviance Residuals:
## Min 1Q Median 3Q Max
## -3.7894 -0.3586 0.0000 0.0000 18.4306
##
## Coefficients:
## Estimate Std. Error t value Pr(>|t|)
## (Intercept) 2.089e-16 6.326e-01 0.000 1.000
## CountryKEN 3.342e-01 1.000e+00 0.334 0.739
## CountryETH 1.768e-15 2.758e+00 0.000 1.000
## CountryGUI -6.666e-16 9.384e-01 0.000 1.000
## CountryGHA 3.789e+00 8.947e-01 4.235 4.09e-05 ***
## CountryBKF 3.586e-01 7.535e-01 0.476 0.635
## CountryZIM -5.254e-16 1.059e+00 0.000 1.000
## CountryZAM -6.858e-16 2.758e+00 0.000 1.000
## CountrySAF -1.921e-16 1.141e+00 0.000 1.000
## CountryUGA -8.262e-16 1.357e+00 0.000 1.000
## CountryURT 2.350e-01 1.265e+00 0.186 0.853
## CountrySWA -1.292e-15 2.758e+00 0.000 1.000
## CountrySEN -9.176e-16 9.384e-01 0.000 1.000
## CountryZAI -1.251e-16 2.758e+00 0.000 1.000
## CountryMOZ -1.138e-16 2.001e+00 0.000 1.000
## ---
## Signif. codes: 0 '***' 0.001 '**' 0.01 '*' 0.05 '.' 0.1 ' ' 1
##
## (Dispersion parameter for gaussian family taken to be 7.204325)
##
## Null deviance: 1230.7 on 155 degrees of freedom
## Residual deviance: 1015.8 on 141 degrees of freedom
## AIC: 766.99
##
## Number of Fisher Scoring iterations: 2

data$Country <- relevel(data$Country, ref= "MOZ")
model1<-glm((Prev_TcTz) ~ Country,data=data, family=gaussian())
summary(model1)

##
## Call:
## glm(formula = (Prev_TcTz) ~ Country, family = gaussian(), data = data)
##
## Deviance Residuals:
## Min 1Q Median 3Q Max
## -3.7894 -0.3586 0.0000 0.0000 18.4306
##
## Coefficients:
## Estimate Std. Error t value Pr(>|t|)
## (Intercept) 2.451e-15 1.898e+00 0.000 1.0000
## CountryMLI -3.412e-15 2.001e+00 0.000 1.0000
## CountryKEN 3.342e-01 2.050e+00 0.163 0.8707
## CountryETH -2.103e-15 3.287e+00 0.000 1.0000
## CountryGUI -4.523e-15 2.021e+00 0.000 1.0000
## CountryGHA 3.789e+00 2.001e+00 1.894 0.0603 .
## CountryBKF 3.586e-01 1.942e+00 0.185 0.8537
## CountryZIM -2.962e-15 2.079e+00 0.000 1.0000
## CountryZAM -4.012e-15 3.287e+00 0.000 1.0000
## CountrySAF -3.407e-15 2.122e+00 0.000 1.0000
## CountryUGA -2.651e-15 2.246e+00 0.000 1.0000
## CountryURT 2.350e-01 2.192e+00 0.107 0.9148
## CountrySWA -7.183e-15 3.287e+00 0.000 1.0000
## CountrySEN -3.305e-15 2.021e+00 0.000 1.0000
## CountryZAI -1.700e-15 3.287e+00 0.000 1.0000
## ---
## Signif. codes: 0 '***' 0.001 '**' 0.01 '*' 0.05 '.' 0.1 ' ' 1
##
## (Dispersion parameter for gaussian family taken to be 7.204325)
##
## Null deviance: 1230.7 on 155 degrees of freedom
## Residual deviance: 1015.8 on 141 degrees of freedom
## AIC: 766.99
##
## Number of Fisher Scoring iterations: 2

data$Country <- relevel(data$Country, ref= "ZAI")
model1<-glm((Prev_TcTz) ~ Country,data=data, family=gaussian())
summary(model1)

##
## Call:
## glm(formula = (Prev_TcTz) ~ Country, family = gaussian(), data = data)
##
## Deviance Residuals:
## Min 1Q Median 3Q Max
## -3.7894 -0.3586 0.0000 0.0000 18.4306
##
## Coefficients:
## Estimate Std. Error t value Pr(>|t|)
## (Intercept) 2.585e-15 2.684e+00 0.000 1.000
## CountryMOZ 1.695e-16 3.287e+00 0.000 1.000
## CountryMLI -1.507e-15 2.758e+00 0.000 1.000
## CountryKEN 3.342e-01 2.794e+00 0.120 0.905
## CountryETH 8.687e-15 3.796e+00 0.000 1.000
## CountryGUI -9.789e-16 2.772e+00 0.000 1.000
## CountryGHA 3.789e+00 2.758e+00 1.374 0.172
## CountryBKF 3.586e-01 2.715e+00 0.132 0.895
## CountryZIM -3.095e-15 2.815e+00 0.000 1.000
## CountryZAM -4.302e-15 3.796e+00 0.000 1.000
## CountrySAF -4.216e-15 2.847e+00 0.000 1.000
## CountryUGA -4.170e-15 2.940e+00 0.000 1.000
## CountryURT 2.350e-01 2.899e+00 0.081 0.936
## CountrySWA -3.049e-15 3.796e+00 0.000 1.000
## CountrySEN -3.741e-15 2.772e+00 0.000 1.000
##
## (Dispersion parameter for gaussian family taken to be 7.204325)
##
## Null deviance: 1230.7 on 155 degrees of freedom
## Residual deviance: 1015.8 on 141 degrees of freedom
## AIC: 766.99
##
## Number of Fisher Scoring iterations: 2

data$Country <- relevel(data$Country, ref= "SEN")
model1<-glm((Prev_TcTz) ~ Country,data=data, family=gaussian())
summary(model1)

##
## Call:
## glm(formula = (Prev_TcTz) ~ Country, family = gaussian(), data = data)
##
## Deviance Residuals:
## Min 1Q Median 3Q Max
## -3.7894 -0.3586 0.0000 0.0000 18.4306
##
## Coefficients:
## Estimate Std. Error t value Pr(>|t|)
## (Intercept) -1.874e-15 6.930e-01 0.000 1.000
## CountryZAI 9.262e-16 2.772e+00 0.000 1.000
## CountryMOZ 3.636e-15 2.021e+00 0.000 1.000
## CountryMLI 1.727e-15 9.384e-01 0.000 1.000
## CountryKEN 3.342e-01 1.040e+00 0.321 0.748
## CountryETH 2.669e-15 2.772e+00 0.000 1.000
## CountryGUI 8.571e-16 9.801e-01 0.000 1.000
## CountryGHA 3.789e+00 9.384e-01 4.038 8.8e-05 ***
## CountryBKF 3.586e-01 8.049e-01 0.446 0.657
## CountryZIM 1.289e-15 1.096e+00 0.000 1.000
## CountryZAM -3.120e-14 2.772e+00 0.000 1.000
## CountrySAF 1.648e-15 1.175e+00 0.000 1.000
## CountryUGA 1.238e-15 1.386e+00 0.000 1.000
## CountryURT 2.350e-01 1.297e+00 0.181 0.856
## CountrySWA 9.110e-16 2.772e+00 0.000 1.000
## ---
## Signif. codes: 0 '***' 0.001 '**' 0.01 '*' 0.05 '.' 0.1 ' ' 1
##
## (Dispersion parameter for gaussian family taken to be 7.204325)
##
## Null deviance: 1230.7 on 155 degrees of freedom
## Residual deviance: 1015.8 on 141 degrees of freedom
## AIC: 766.99
##
## Number of Fisher Scoring iterations: 2

data$Country <- relevel(data$Country, ref= "SWA")
model1<-glm((Prev_TcTz) ~ Country,data=data, family=gaussian())
summary(model1)

##
## Call:
## glm(formula = (Prev_TcTz) ~ Country, family = gaussian(), data = data)
##
## Deviance Residuals:
## Min 1Q Median 3Q Max
## -3.7894 -0.3586 0.0000 0.0000 18.4306
##
## Coefficients:
## Estimate Std. Error t value Pr(>|t|)
## (Intercept) -7.527e-15 2.684e+00 0.000 1.000
## CountrySEN 1.102e-14 2.772e+00 0.000 1.000
## CountryZAI 6.513e-15 3.796e+00 0.000 1.000
## CountryMOZ 1.088e-14 3.287e+00 0.000 1.000
## CountryMLI 5.711e-15 2.758e+00 0.000 1.000
## CountryKEN 3.342e-01 2.794e+00 0.120 0.905
## CountryETH 1.209e-14 3.796e+00 0.000 1.000
## CountryGUI 8.285e-15 2.772e+00 0.000 1.000
## CountryGHA 3.789e+00 2.758e+00 1.374 0.172
## CountryBKF 3.586e-01 2.715e+00 0.132 0.895
## CountryZIM 8.210e-15 2.815e+00 0.000 1.000
## CountryZAM 5.515e-15 3.796e+00 0.000 1.000
## CountrySAF 9.175e-15 2.847e+00 0.000 1.000
## CountryUGA 6.696e-15 2.940e+00 0.000 1.000
## CountryURT 2.350e-01 2.899e+00 0.081 0.936
##
## (Dispersion parameter for gaussian family taken to be 7.204325)
##
## Null deviance: 1230.7 on 155 degrees of freedom
## Residual deviance: 1015.8 on 141 degrees of freedom
## AIC: 766.99
##
## Number of Fisher Scoring iterations: 2

data$Country <- relevel(data$Country, ref= "URT")
model1<-glm((Prev_TcTz) ~ Country,data=data, family=gaussian())
summary(model1)

##
## Call:
## glm(formula = (Prev_TcTz) ~ Country, family = gaussian(), data = data)
##
## Deviance Residuals:
## Min 1Q Median 3Q Max
## -3.7894 -0.3586 0.0000 0.0000 18.4306
##
## Coefficients:
## Estimate Std. Error t value Pr(>|t|)
## (Intercept) 0.23500 1.09577 0.214 0.83050
## CountrySWA -0.23500 2.89915 -0.081 0.93551
## CountrySEN -0.23500 1.29654 -0.181 0.85643
## CountryZAI -0.23500 2.89915 -0.081 0.93551
## CountryMOZ -0.23500 2.19155 -0.107 0.91476
## CountryMLI -0.23500 1.26529 -0.186 0.85292
## CountryKEN 0.09917 1.34204 0.074 0.94120
## CountryETH -0.23500 2.89915 -0.081 0.93551
## CountryGUI -0.23500 1.29654 -0.181 0.85643
## CountryGHA 3.55444 1.26529 2.809 0.00567 **
## CountryBKF 0.12360 1.16973 0.106 0.91599
## CountryZIM -0.23500 1.38606 -0.170 0.86561
## CountryZAM -0.23500 2.89915 -0.081 0.93551
## CountrySAF -0.23500 1.44957 -0.162 0.87145
## CountryUGA -0.23500 1.62530 -0.145 0.88524
## ---
## Signif. codes: 0 '***' 0.001 '**' 0.01 '*' 0.05 '.' 0.1 ' ' 1
##
## (Dispersion parameter for gaussian family taken to be 7.204325)
##
## Null deviance: 1230.7 on 155 degrees of freedom
## Residual deviance: 1015.8 on 141 degrees of freedom
## AIC: 766.99
##
## Number of Fisher Scoring iterations: 2

data$Country <- relevel(data$Country, ref= "UGA")
model1<-glm((Prev_TcTz) ~ Country,data=data, family=gaussian())
summary(model1)

##
## Call:
## glm(formula = (Prev_TcTz) ~ Country, family = gaussian(), data = data)
##
## Deviance Residuals:
## Min 1Q Median 3Q Max
## -3.7894 -0.3586 0.0000 0.0000 18.4306
##
## Coefficients:
## Estimate Std. Error t value Pr(>|t|)
## (Intercept) -1.222e-15 1.200e+00 0.000 1.00000
## CountryURT 2.350e-01 1.625e+00 0.145 0.88524
## CountrySWA 1.962e-15 2.940e+00 0.000 1.00000
## CountrySEN 4.112e-15 1.386e+00 0.000 1.00000
## CountryZAI -4.143e-15 2.940e+00 0.000 1.00000
## CountryMOZ -8.805e-17 2.246e+00 0.000 1.00000
## CountryMLI -3.170e-16 1.357e+00 0.000 1.00000
## CountryKEN 3.342e-01 1.429e+00 0.234 0.81541
## CountryETH -1.171e-15 2.940e+00 0.000 1.00000
## CountryGUI 1.119e-15 1.386e+00 0.000 1.00000
## CountryGHA 3.789e+00 1.357e+00 2.793 0.00595 **
## CountryBKF 3.586e-01 1.268e+00 0.283 0.77778
## CountryZIM 1.815e-15 1.470e+00 0.000 1.00000
## CountryZAM 9.729e-16 2.940e+00 0.000 1.00000
## CountrySAF 1.768e-15 1.530e+00 0.000 1.00000
## ---
## Signif. codes: 0 '***' 0.001 '**' 0.01 '*' 0.05 '.' 0.1 ' ' 1
##
## (Dispersion parameter for gaussian family taken to be 7.204325)
##
## Null deviance: 1230.7 on 155 degrees of freedom
## Residual deviance: 1015.8 on 141 degrees of freedom
## AIC: 766.99
##
## Number of Fisher Scoring iterations: 2

data$Country <- relevel(data$Country, ref= "SAF")
model1<-glm((Prev_TcTz) ~ Country,data=data, family=gaussian())
summary(model1)

##
## Call:
## glm(formula = (Prev_TcTz) ~ Country, family = gaussian(), data = data)
##
## Deviance Residuals:
## Min 1Q Median 3Q Max
## -3.7894 -0.3586 0.0000 0.0000 18.4306
##
## Coefficients:
## Estimate Std. Error t value Pr(>|t|)
## (Intercept) 1.492e-15 9.490e-01 0.000 1.00000
## CountryUGA -2.430e-15 1.530e+00 0.000 1.00000
## CountryURT 2.350e-01 1.450e+00 0.162 0.87145
## CountrySWA -7.619e-16 2.847e+00 0.000 1.00000
## CountrySEN -5.865e-16 1.175e+00 0.000 1.00000
## CountryZAI -4.824e-15 2.847e+00 0.000 1.00000
## CountryMOZ 8.483e-17 2.122e+00 0.000 1.00000
## CountryMLI -1.449e-15 1.141e+00 0.000 1.00000
## CountryKEN 3.342e-01 1.225e+00 0.273 0.78543
## CountryETH 5.042e-15 2.847e+00 0.000 1.00000
## CountryGUI 1.249e-16 1.175e+00 0.000 1.00000
## CountryGHA 3.789e+00 1.141e+00 3.323 0.00114 **
## CountryBKF 3.586e-01 1.033e+00 0.347 0.72912
## CountryZIM -1.675e-15 1.273e+00 0.000 1.00000
## CountryZAM -8.464e-16 2.847e+00 0.000 1.00000
## ---
## Signif. codes: 0 '***' 0.001 '**' 0.01 '*' 0.05 '.' 0.1 ' ' 1
##
## (Dispersion parameter for gaussian family taken to be 7.204325)
##
## Null deviance: 1230.7 on 155 degrees of freedom
## Residual deviance: 1015.8 on 141 degrees of freedom
## AIC: 766.99
##
## Number of Fisher Scoring iterations: 2

data$Country <- relevel(data$Country, ref= "ZAM")
model1<-glm((Prev_TcTz) ~ Country,data=data, family=gaussian())
summary(model1)

##
## Call:
## glm(formula = (Prev_TcTz) ~ Country, family = gaussian(), data = data)
##
## Deviance Residuals:
## Min 1Q Median 3Q Max
## -3.7894 -0.3586 0.0000 0.0000 18.4306
##
## Coefficients:
## Estimate Std. Error t value Pr(>|t|)
## (Intercept) -4.631e-15 2.684e+00 0.000 1.000
## CountrySAF 3.665e-15 2.847e+00 0.000 1.000
## CountryUGA 4.773e-15 2.940e+00 0.000 1.000
## CountryURT 2.350e-01 2.899e+00 0.081 0.936
## CountrySWA -3.759e-15 3.796e+00 0.000 1.000
## CountrySEN 3.169e-15 2.772e+00 0.000 1.000
## CountryZAI 6.544e-15 3.796e+00 0.000 1.000
## CountryMOZ 2.690e-15 3.287e+00 0.000 1.000
## CountryMLI 5.472e-15 2.758e+00 0.000 1.000
## CountryKEN 3.342e-01 2.794e+00 0.120 0.905
## CountryETH 8.794e-15 3.796e+00 0.000 1.000
## CountryGUI 5.672e-15 2.772e+00 0.000 1.000
## CountryGHA 3.789e+00 2.758e+00 1.374 0.172
## CountryBKF 3.586e-01 2.715e+00 0.132 0.895
## CountryZIM 4.105e-15 2.815e+00 0.000 1.000
##
## (Dispersion parameter for gaussian family taken to be 7.204325)
##
## Null deviance: 1230.7 on 155 degrees of freedom
## Residual deviance: 1015.8 on 141 degrees of freedom
## AIC: 766.99
##
## Number of Fisher Scoring iterations: 2

data$Country <- relevel(data$Country, ref= "ZIM")
model1<-glm((Prev_TcTz) ~ Country,data=data, family=gaussian())
summary(model1)

##
## Call:
## glm(formula = (Prev_TcTz) ~ Country, family = gaussian(), data = data)
##
## Deviance Residuals:
## Min 1Q Median 3Q Max
## -3.7894 -0.3586 0.0000 0.0000 18.4306
##
## Coefficients:
## Estimate Std. Error t value Pr(>|t|)
## (Intercept) 2.194e-15 8.488e-01 0.000 1.000000
## CountryZAM -5.394e-15 2.815e+00 0.000 1.000000
## CountrySAF -3.226e-16 1.273e+00 0.000 1.000000
## CountryUGA -2.595e-15 1.470e+00 0.000 1.000000
## CountryURT 2.350e-01 1.386e+00 0.170 0.865610
## CountrySWA -5.910e-15 2.815e+00 0.000 1.000000
## CountrySEN -3.719e-15 1.096e+00 0.000 1.000000
## CountryZAI 1.144e-16 2.815e+00 0.000 1.000000
## CountryMOZ 4.144e-15 2.079e+00 0.000 1.000000
## CountryMLI -5.334e-16 1.059e+00 0.000 1.000000
## CountryKEN 3.342e-01 1.149e+00 0.291 0.771656
## CountryETH -2.672e-15 2.815e+00 0.000 1.000000
## CountryGUI -3.155e-15 1.096e+00 0.000 1.000000
## CountryGHA 3.789e+00 1.059e+00 3.580 0.000472 ***
## CountryBKF 3.586e-01 9.423e-01 0.381 0.704107
## ---
## Signif. codes: 0 '***' 0.001 '**' 0.01 '*' 0.05 '.' 0.1 ' ' 1
##
## (Dispersion parameter for gaussian family taken to be 7.204325)
##
## Null deviance: 1230.7 on 155 degrees of freedom
## Residual deviance: 1015.8 on 141 degrees of freedom
## AIC: 766.99
##
## Number of Fisher Scoring iterations: 2

#======== Glm TcTsg per country
data$Country <- relevel(data$Country, ref= "BKF")
model1<-glm((Prev_TcTsg) ~ Country,data=data, family=gaussian())
summary(model1)

##
## Call:
## glm(formula = (Prev_TcTsg) ~ Country, family = gaussian(), data = data)
##
## Deviance Residuals:
## Min 1Q Median 3Q Max
## -4.6633 -0.1012 0.0000 0.0000 16.4667
##
## Coefficients:
## Estimate Std. Error t value Pr(>|t|)
## (Intercept) 0.1012 0.3926 0.258 0.79701
## CountryZIM 1.5788 0.9037 1.747 0.08281 .
## CountryZAM 7.4288 2.6039 2.853 0.00498 **
## CountrySAF 0.3538 0.9912 0.357 0.72163
## CountryUGA 0.1108 1.2163 0.091 0.92752
## CountryURT 4.5622 1.1218 4.067 7.89e-05 ***
## CountrySWA -0.1012 2.6039 -0.039 0.96906
## CountrySEN -0.1012 0.7719 -0.131 0.89592
## CountryZAI -0.1012 2.6039 -0.039 0.96906
## CountryMOZ -0.1012 1.8621 -0.054 0.95675
## CountryMLI -0.1012 0.7227 -0.140 0.88887
## CountryKEN 4.2872 0.8404 5.101 1.07e-06 ***
## CountryETH 0.5488 2.6039 0.211 0.83337
## CountryGUI -0.1012 0.7719 -0.131 0.89592
## CountryGHA -0.1012 0.7227 -0.140 0.88887
## ---
## Signif. codes: 0 '***' 0.001 '**' 0.01 '*' 0.05 '.' 0.1 ' ' 1
##
## (Dispersion parameter for gaussian family taken to be 6.626342)
##
## Null deviance: 1299.26 on 155 degrees of freedom
## Residual deviance: 934.31 on 141 degrees of freedom
## AIC: 753.94
##
## Number of Fisher Scoring iterations: 2

data$Country <- relevel(data$Country, ref= "GHA")
model1<-glm((Prev_TcTsg) ~ Country,data=data, family=gaussian())
summary(model1)

##
## Call:
## glm(formula = (Prev_TcTsg) ~ Country, family = gaussian(), data = data)
##
## Deviance Residuals:
## Min 1Q Median 3Q Max
## -4.6633 -0.1012 0.0000 0.0000 16.4667
##
## Coefficients:
## Estimate Std. Error t value Pr(>|t|)
## (Intercept) -5.756e-15 6.067e-01 0.000 1.000000
## CountryBKF 1.012e-01 7.227e-01 0.140 0.888870
## CountryZIM 1.680e+00 1.015e+00 1.655 0.100202
## CountryZAM 7.530e+00 2.645e+00 2.847 0.005070 **
## CountrySAF 4.550e-01 1.094e+00 0.416 0.678059
## CountryUGA 2.120e-01 1.301e+00 0.163 0.870820
## CountryURT 4.663e+00 1.213e+00 3.843 0.000183 ***
## CountrySWA 5.657e-15 2.645e+00 0.000 1.000000
## CountrySEN 1.014e-14 8.999e-01 0.000 1.000000
## CountryZAI 7.705e-15 2.645e+00 0.000 1.000000
## CountryMOZ 1.346e-14 1.919e+00 0.000 1.000000
## CountryMLI 4.198e-15 8.581e-01 0.000 1.000000
## CountryKEN 4.388e+00 9.593e-01 4.574 1.04e-05 ***
## CountryETH 6.500e-01 2.645e+00 0.246 0.806215
## CountryGUI 3.901e-15 8.999e-01 0.000 1.000000
## ---
## Signif. codes: 0 '***' 0.001 '**' 0.01 '*' 0.05 '.' 0.1 ' ' 1
##
## (Dispersion parameter for gaussian family taken to be 6.626342)
##
## Null deviance: 1299.26 on 155 degrees of freedom
## Residual deviance: 934.31 on 141 degrees of freedom
## AIC: 753.94
##
## Number of Fisher Scoring iterations: 2

data$Country <- relevel(data$Country, ref= "GUI")
model1<-glm((Prev_TcTsg) ~ Country,data=data, family=gaussian())
summary(model1)

##
## Call:
## glm(formula = (Prev_TcTsg) ~ Country, family = gaussian(), data = data)
##
## Deviance Residuals:
## Min 1Q Median 3Q Max
## -4.6633 -0.1012 0.0000 0.0000 16.4667
##
## Coefficients:
## Estimate Std. Error t value Pr(>|t|)
## (Intercept) 5.850e-15 6.646e-01 0.000 1.000000
## CountryGHA -5.634e-15 8.999e-01 0.000 1.000000
## CountryBKF 1.012e-01 7.719e-01 0.131 0.895920
## CountryZIM 1.680e+00 1.051e+00 1.599 0.112141
## CountryZAM 7.530e+00 2.659e+00 2.832 0.005298 **
## CountrySAF 4.550e-01 1.127e+00 0.404 0.687016
## CountryUGA 2.120e-01 1.329e+00 0.159 0.873517
## CountryURT 4.663e+00 1.243e+00 3.750 0.000257 ***
## CountrySWA -3.896e-15 2.659e+00 0.000 1.000000
## CountrySEN -4.078e-15 9.400e-01 0.000 1.000000
## CountryZAI -7.877e-15 2.659e+00 0.000 1.000000
## CountryMOZ -5.226e-15 1.938e+00 0.000 1.000000
## CountryMLI -1.878e-15 8.999e-01 0.000 1.000000
## CountryKEN 4.388e+00 9.970e-01 4.402 2.11e-05 ***
## CountryETH 6.500e-01 2.659e+00 0.244 0.807206
## ---
## Signif. codes: 0 '***' 0.001 '**' 0.01 '*' 0.05 '.' 0.1 ' ' 1
##
## (Dispersion parameter for gaussian family taken to be 6.626342)
##
## Null deviance: 1299.26 on 155 degrees of freedom
## Residual deviance: 934.31 on 141 degrees of freedom
## AIC: 753.94
##
## Number of Fisher Scoring iterations: 2

data$Country <- relevel(data$Country, ref= "ETH")
model1<-glm((Prev_TcTsg) ~ Country,data=data, family=gaussian())
summary(model1)

##
## Call:
## glm(formula = (Prev_TcTsg) ~ Country, family = gaussian(), data = data)
##
## Deviance Residuals:
## Min 1Q Median 3Q Max
## -4.6633 -0.1012 0.0000 0.0000 16.4667
##
## Coefficients:
## Estimate Std. Error t value Pr(>|t|)
## (Intercept) 0.6500 2.5742 0.253 0.8010
## CountryGUI -0.6500 2.6586 -0.244 0.8072
## CountryGHA -0.6500 2.6447 -0.246 0.8062
## CountryBKF -0.5488 2.6039 -0.211 0.8334
## CountryZIM 1.0300 2.6998 0.382 0.7034
## CountryZAM 6.8800 3.6404 1.890 0.0608 .
## CountrySAF -0.1950 2.7303 -0.071 0.9432
## CountryUGA -0.4380 2.8199 -0.155 0.8768
## CountryURT 4.0133 2.7804 1.443 0.1511
## CountrySWA -0.6500 3.6404 -0.179 0.8585
## CountrySEN -0.6500 2.6586 -0.244 0.8072
## CountryZAI -0.6500 3.6404 -0.179 0.8585
## CountryMOZ -0.6500 3.1527 -0.206 0.8370
## CountryMLI -0.6500 2.6447 -0.246 0.8062
## CountryKEN 3.7383 2.6793 1.395 0.1651
## ---
## Signif. codes: 0 '***' 0.001 '**' 0.01 '*' 0.05 '.' 0.1 ' ' 1
##
## (Dispersion parameter for gaussian family taken to be 6.626342)
##
## Null deviance: 1299.26 on 155 degrees of freedom
## Residual deviance: 934.31 on 141 degrees of freedom
## AIC: 753.94
##
## Number of Fisher Scoring iterations: 2

data$Country <- relevel(data$Country, ref= "KEN")
model1<-glm((Prev_TcTsg) ~ Country,data=data, family=gaussian())
summary(model1)

##
## Call:
## glm(formula = (Prev_TcTsg) ~ Country, family = gaussian(), data = data)
##
## Deviance Residuals:
## Min 1Q Median 3Q Max
## -4.6633 -0.1012 0.0000 0.0000 16.4667
##
## Coefficients:
## Estimate Std. Error t value Pr(>|t|)
## (Intercept) 4.3883 0.7431 5.905 2.51e-08 ***
## CountryETH -3.7383 2.6793 -1.395 0.16513
## CountryGUI -4.3883 0.9970 -4.402 2.11e-05 ***
## CountryGHA -4.3883 0.9593 -4.574 1.04e-05 ***
## CountryBKF -4.2872 0.8404 -5.101 1.07e-06 ***
## CountryZIM -2.7083 1.1022 -2.457 0.01522 *
## CountryZAM 3.1417 2.6793 1.173 0.24294
## CountrySAF -3.9333 1.1749 -3.348 0.00105 **
## CountryUGA -4.1763 1.3702 -3.048 0.00275 **
## CountryURT 0.2750 1.2871 0.214 0.83112
## CountrySWA -4.3883 2.6793 -1.638 0.10368
## CountrySEN -4.3883 0.9970 -4.402 2.11e-05 ***
## CountryZAI -4.3883 2.6793 -1.638 0.10368
## CountryMOZ -4.3883 1.9661 -2.232 0.02719 *
## CountryMLI -4.3883 0.9593 -4.574 1.04e-05 ***
## ---
## Signif. codes: 0 '***' 0.001 '**' 0.01 '*' 0.05 '.' 0.1 ' ' 1
##
## (Dispersion parameter for gaussian family taken to be 6.626342)
##
## Null deviance: 1299.26 on 155 degrees of freedom
## Residual deviance: 934.31 on 141 degrees of freedom
## AIC: 753.94
##
## Number of Fisher Scoring iterations: 2

data$Country <- relevel(data$Country, ref= "MLI")
model1<-glm((Prev_TcTz) ~ Country,data=data, family=gaussian())
summary(model1)

##
## Call:
## glm(formula = (Prev_TcTz) ~ Country, family = gaussian(), data = data)
##
## Deviance Residuals:
## Min 1Q Median 3Q Max
## -3.7894 -0.3586 0.0000 0.0000 18.4306
##
## Coefficients:
## Estimate Std. Error t value Pr(>|t|)
## (Intercept) 2.089e-16 6.326e-01 0.000 1.000
## CountryKEN 3.342e-01 1.000e+00 0.334 0.739
## CountryETH 1.768e-15 2.758e+00 0.000 1.000
## CountryGUI -6.666e-16 9.384e-01 0.000 1.000
## CountryGHA 3.789e+00 8.947e-01 4.235 4.09e-05 ***
## CountryBKF 3.586e-01 7.535e-01 0.476 0.635
## CountryZIM -5.254e-16 1.059e+00 0.000 1.000
## CountryZAM -6.858e-16 2.758e+00 0.000 1.000
## CountrySAF -1.921e-16 1.141e+00 0.000 1.000
## CountryUGA -8.262e-16 1.357e+00 0.000 1.000
## CountryURT 2.350e-01 1.265e+00 0.186 0.853
## CountrySWA -1.292e-15 2.758e+00 0.000 1.000
## CountrySEN -9.176e-16 9.384e-01 0.000 1.000
## CountryZAI -1.251e-16 2.758e+00 0.000 1.000
## CountryMOZ -1.138e-16 2.001e+00 0.000 1.000
## ---
## Signif. codes: 0 '***' 0.001 '**' 0.01 '*' 0.05 '.' 0.1 ' ' 1
##
## (Dispersion parameter for gaussian family taken to be 7.204325)
##
## Null deviance: 1230.7 on 155 degrees of freedom
## Residual deviance: 1015.8 on 141 degrees of freedom
## AIC: 766.99
##
## Number of Fisher Scoring iterations: 2

data$Country <- relevel(data$Country, ref= "MOZ")
model1<-glm((Prev_TcTsg) ~ Country,data=data, family=gaussian())
summary(model1)

##
## Call:
## glm(formula = (Prev_TcTsg) ~ Country, family = gaussian(), data = data)
##
## Deviance Residuals:
## Min 1Q Median 3Q Max
## -4.6633 -0.1012 0.0000 0.0000 16.4667
##
## Coefficients:
## Estimate Std. Error t value Pr(>|t|)
## (Intercept) -1.047e-14 1.820e+00 0.000 1.0000
## CountryMLI 1.063e-14 1.919e+00 0.000 1.0000
## CountryKEN 4.388e+00 1.966e+00 2.232 0.0272 *
## CountryETH 6.500e-01 3.153e+00 0.206 0.8370
## CountryGUI -5.284e-15 1.938e+00 0.000 1.0000
## CountryGHA 1.360e-14 1.919e+00 0.000 1.0000
## CountryBKF 1.012e-01 1.862e+00 0.054 0.9568
## CountryZIM 1.680e+00 1.994e+00 0.843 0.4009
## CountryZAM 7.530e+00 3.153e+00 2.388 0.0182 *
## CountrySAF 4.550e-01 2.035e+00 0.224 0.8234
## CountryUGA 2.120e-01 2.154e+00 0.098 0.9217
## CountryURT 4.663e+00 2.102e+00 2.219 0.0281 *
## CountrySWA 1.073e-14 3.153e+00 0.000 1.0000
## CountrySEN 1.232e-14 1.938e+00 0.000 1.0000
## CountryZAI 3.263e-15 3.153e+00 0.000 1.0000
## ---
## Signif. codes: 0 '***' 0.001 '**' 0.01 '*' 0.05 '.' 0.1 ' ' 1
##
## (Dispersion parameter for gaussian family taken to be 6.626342)
##
## Null deviance: 1299.26 on 155 degrees of freedom
## Residual deviance: 934.31 on 141 degrees of freedom
## AIC: 753.94
##
## Number of Fisher Scoring iterations: 2

data$Country <- relevel(data$Country, ref= "ZAI")
model1<-glm((Prev_TcTsg) ~ Country,data=data, family=gaussian())
summary(model1)

##
## Call:
## glm(formula = (Prev_TcTsg) ~ Country, family = gaussian(), data = data)
##
## Deviance Residuals:
## Min 1Q Median 3Q Max
## -4.6633 -0.1012 0.0000 0.0000 16.4667
##
## Coefficients:
## Estimate Std. Error t value Pr(>|t|)
## (Intercept) 2.621e-14 2.574e+00 0.000 1.0000
## CountryMOZ -2.354e-14 3.153e+00 0.000 1.0000
## CountryMLI -2.361e-14 2.645e+00 0.000 1.0000
## CountryKEN 4.388e+00 2.679e+00 1.638 0.1037
## CountryETH 6.500e-01 3.640e+00 0.179 0.8585
## CountryGUI -3.327e-14 2.659e+00 0.000 1.0000
## CountryGHA -2.543e-14 2.645e+00 0.000 1.0000
## CountryBKF 1.012e-01 2.604e+00 0.039 0.9691
## CountryZIM 1.680e+00 2.700e+00 0.622 0.5348
## CountryZAM 7.530e+00 3.640e+00 2.068 0.0404 *
## CountrySAF 4.550e-01 2.730e+00 0.167 0.8679
## CountryUGA 2.120e-01 2.820e+00 0.075 0.9402
## CountryURT 4.663e+00 2.780e+00 1.677 0.0957 .
## CountrySWA -2.526e-14 3.640e+00 0.000 1.0000
## CountrySEN -3.073e-14 2.659e+00 0.000 1.0000
## ---
## Signif. codes: 0 '***' 0.001 '**' 0.01 '*' 0.05 '.' 0.1 ' ' 1
##
## (Dispersion parameter for gaussian family taken to be 6.626342)
##
## Null deviance: 1299.26 on 155 degrees of freedom
## Residual deviance: 934.31 on 141 degrees of freedom
## AIC: 753.94
##
## Number of Fisher Scoring iterations: 2

data$Country <- relevel(data$Country, ref= "SEN")
model1<-glm((Prev_TcTsg) ~ Country,data=data, family=gaussian())
summary(model1)

##
## Call:
## glm(formula = (Prev_TcTsg) ~ Country, family = gaussian(), data = data)
##
## Deviance Residuals:
## Min 1Q Median 3Q Max
## -4.6633 -0.1012 0.0000 0.0000 16.4667
##
## Coefficients:
## Estimate Std. Error t value Pr(>|t|)
## (Intercept) -5.202e-15 6.646e-01 0.000 1.000000
## CountryZAI 4.809e-15 2.659e+00 0.000 1.000000
## CountryMOZ 3.179e-15 1.938e+00 0.000 1.000000
## CountryMLI 3.176e-15 8.999e-01 0.000 1.000000
## CountryKEN 4.388e+00 9.970e-01 4.402 2.11e-05 ***
## CountryETH 6.500e-01 2.659e+00 0.244 0.807206
## CountryGUI 4.652e-15 9.400e-01 0.000 1.000000
## CountryGHA 1.110e-14 8.999e-01 0.000 1.000000
## CountryBKF 1.012e-01 7.719e-01 0.131 0.895920
## CountryZIM 1.680e+00 1.051e+00 1.599 0.112141
## CountryZAM 7.530e+00 2.659e+00 2.832 0.005298 **
## CountrySAF 4.550e-01 1.127e+00 0.404 0.687016
## CountryUGA 2.120e-01 1.329e+00 0.159 0.873517
## CountryURT 4.663e+00 1.243e+00 3.750 0.000257 ***
## CountrySWA 5.504e-15 2.659e+00 0.000 1.000000
## ---
## Signif. codes: 0 '***' 0.001 '**' 0.01 '*' 0.05 '.' 0.1 ' ' 1
##
## (Dispersion parameter for gaussian family taken to be 6.626342)
##
## Null deviance: 1299.26 on 155 degrees of freedom
## Residual deviance: 934.31 on 141 degrees of freedom
## AIC: 753.94
##
## Number of Fisher Scoring iterations: 2

data$Country <- relevel(data$Country, ref= "SWA")
model1<-glm((Prev_TcTsg) ~ Country,data=data, family=gaussian())
summary(model1)

##
## Call:
## glm(formula = (Prev_TcTsg) ~ Country, family = gaussian(), data = data)
##
## Deviance Residuals:
## Min 1Q Median 3Q Max
## -4.6633 -0.1012 0.0000 0.0000 16.4667
##
## Coefficients:
## Estimate Std. Error t value Pr(>|t|)
## (Intercept) 3.185e-14 2.574e+00 0.000 1.0000
## CountrySEN -3.144e-14 2.659e+00 0.000 1.0000
## CountryZAI -3.168e-14 3.640e+00 0.000 1.0000
## CountryMOZ -2.996e-14 3.153e+00 0.000 1.0000
## CountryMLI -6.544e-14 2.645e+00 0.000 1.0000
## CountryKEN 4.388e+00 2.679e+00 1.638 0.1037
## CountryETH 6.500e-01 3.640e+00 0.179 0.8585
## CountryGUI -3.930e-14 2.659e+00 0.000 1.0000
## CountryGHA -2.563e-14 2.645e+00 0.000 1.0000
## CountryBKF 1.012e-01 2.604e+00 0.039 0.9691
## CountryZIM 1.680e+00 2.700e+00 0.622 0.5348
## CountryZAM 7.530e+00 3.640e+00 2.068 0.0404 *
## CountrySAF 4.550e-01 2.730e+00 0.167 0.8679
## CountryUGA 2.120e-01 2.820e+00 0.075 0.9402
## CountryURT 4.663e+00 2.780e+00 1.677 0.0957 .
## ---
## Signif. codes: 0 '***' 0.001 '**' 0.01 '*' 0.05 '.' 0.1 ' ' 1
##
## (Dispersion parameter for gaussian family taken to be 6.626342)
##
## Null deviance: 1299.26 on 155 degrees of freedom
## Residual deviance: 934.31 on 141 degrees of freedom
## AIC: 753.94
##
## Number of Fisher Scoring iterations: 2

data$Country <- relevel(data$Country, ref= "URT")
model1<-glm((Prev_TcTz) ~ Country,data=data, family=gaussian())
summary(model1)

##
## Call:
## glm(formula = (Prev_TcTz) ~ Country, family = gaussian(), data = data)
##
## Deviance Residuals:
## Min 1Q Median 3Q Max
## -3.7894 -0.3586 0.0000 0.0000 18.4306
##
## Coefficients:
## Estimate Std. Error t value Pr(>|t|)
## (Intercept) 0.23500 1.09577 0.214 0.83050
## CountrySWA -0.23500 2.89915 -0.081 0.93551
## CountrySEN -0.23500 1.29654 -0.181 0.85643
## CountryZAI -0.23500 2.89915 -0.081 0.93551
## CountryMOZ -0.23500 2.19155 -0.107 0.91476
## CountryMLI -0.23500 1.26529 -0.186 0.85292
## CountryKEN 0.09917 1.34204 0.074 0.94120
## CountryETH -0.23500 2.89915 -0.081 0.93551
## CountryGUI -0.23500 1.29654 -0.181 0.85643
## CountryGHA 3.55444 1.26529 2.809 0.00567 **
## CountryBKF 0.12360 1.16973 0.106 0.91599
## CountryZIM -0.23500 1.38606 -0.170 0.86561
## CountryZAM -0.23500 2.89915 -0.081 0.93551
## CountrySAF -0.23500 1.44957 -0.162 0.87145
## CountryUGA -0.23500 1.62530 -0.145 0.88524
## ---
## Signif. codes: 0 '***' 0.001 '**' 0.01 '*' 0.05 '.' 0.1 ' ' 1
##
## (Dispersion parameter for gaussian family taken to be 7.204325)
##
## Null deviance: 1230.7 on 155 degrees of freedom
## Residual deviance: 1015.8 on 141 degrees of freedom
## AIC: 766.99
##
## Number of Fisher Scoring iterations: 2

data$Country <- relevel(data$Country, ref= "UGA")
model1<-glm((Prev_TcTsg) ~ Country,data=data, family=gaussian())
summary(model1)

##
## Call:
## glm(formula = (Prev_TcTsg) ~ Country, family = gaussian(), data = data)
##
## Deviance Residuals:
## Min 1Q Median 3Q Max
## -4.6633 -0.1012 0.0000 0.0000 16.4667
##
## Coefficients:
## Estimate Std. Error t value Pr(>|t|)
## (Intercept) 0.2120 1.1512 0.184 0.85416
## CountryURT 4.4513 1.5587 2.856 0.00494 **
## CountrySWA -0.2120 2.8199 -0.075 0.94018
## CountrySEN -0.2120 1.3293 -0.159 0.87352
## CountryZAI -0.2120 2.8199 -0.075 0.94018
## CountryMOZ -0.2120 2.1537 -0.098 0.92173
## CountryMLI -0.2120 1.3013 -0.163 0.87082
## CountryKEN 4.1763 1.3702 3.048 0.00275 **
## CountryETH 0.4380 2.8199 0.155 0.87679
## CountryGUI -0.2120 1.3293 -0.159 0.87352
## CountryGHA -0.2120 1.3013 -0.163 0.87082
## CountryBKF -0.1108 1.2163 -0.091 0.92752
## CountryZIM 1.4680 1.4099 1.041 0.29957
## CountryZAM 7.3180 2.8199 2.595 0.01045 *
## CountrySAF 0.2430 1.4675 0.166 0.86872
## ---
## Signif. codes: 0 '***' 0.001 '**' 0.01 '*' 0.05 '.' 0.1 ' ' 1
##
## (Dispersion parameter for gaussian family taken to be 6.626342)
##
## Null deviance: 1299.26 on 155 degrees of freedom
## Residual deviance: 934.31 on 141 degrees of freedom
## AIC: 753.94
##
## Number of Fisher Scoring iterations: 2

data$Country <- relevel(data$Country, ref= "SAF")
model1<-glm((Prev_TcTsg) ~ Country,data=data, family=gaussian())
summary(model1)

##
## Call:
## glm(formula = (Prev_TcTsg) ~ Country, family = gaussian(), data = data)
##
## Deviance Residuals:
## Min 1Q Median 3Q Max
## -4.6633 -0.1012 0.0000 0.0000 16.4667
##
## Coefficients:
## Estimate Std. Error t value Pr(>|t|)
## (Intercept) 0.4550 0.9101 0.500 0.61790
## CountryUGA -0.2430 1.4675 -0.166 0.86872
## CountryURT 4.2083 1.3902 3.027 0.00294 **
## CountrySWA -0.4550 2.7303 -0.167 0.86789
## CountrySEN -0.4550 1.1270 -0.404 0.68702
## CountryZAI -0.4550 2.7303 -0.167 0.86789
## CountryMOZ -0.4550 2.0351 -0.224 0.82341
## CountryMLI -0.4550 1.0938 -0.416 0.67806
## CountryKEN 3.9333 1.1749 3.348 0.00105 **
## CountryETH 0.1950 2.7303 0.071 0.94316
## CountryGUI -0.4550 1.1270 -0.404 0.68702
## CountryGHA -0.4550 1.0938 -0.416 0.67806
## CountryBKF -0.3538 0.9912 -0.357 0.72163
## CountryZIM 1.2250 1.2210 1.003 0.31746
## CountryZAM 7.0750 2.7303 2.591 0.01057 *
## ---
## Signif. codes: 0 '***' 0.001 '**' 0.01 '*' 0.05 '.' 0.1 ' ' 1
##
## (Dispersion parameter for gaussian family taken to be 6.626342)
##
## Null deviance: 1299.26 on 155 degrees of freedom
## Residual deviance: 934.31 on 141 degrees of freedom
## AIC: 753.94
##
## Number of Fisher Scoring iterations: 2

data$Country <- relevel(data$Country, ref= "ZAM")
model1<-glm((Prev_TcTsg) ~ Country,data=data, family=gaussian())
summary(model1)

##
## Call:
## glm(formula = (Prev_TcTsg) ~ Country, family = gaussian(), data = data)
##
## Deviance Residuals:
## Min 1Q Median 3Q Max
## -4.6633 -0.1012 0.0000 0.0000 16.4667
##
## Coefficients:
## Estimate Std. Error t value Pr(>|t|)
## (Intercept) 7.530 2.574 2.925 0.00401 **
## CountrySAF -7.075 2.730 -2.591 0.01057 *
## CountryUGA -7.318 2.820 -2.595 0.01045 *
## CountryURT -2.867 2.780 -1.031 0.30430
## CountrySWA -7.530 3.640 -2.068 0.04043 *
## CountrySEN -7.530 2.659 -2.832 0.00530 **
## CountryZAI -7.530 3.640 -2.068 0.04043 *
## CountryMOZ -7.530 3.153 -2.388 0.01824 *
## CountryMLI -7.530 2.645 -2.847 0.00507 **
## CountryKEN -3.142 2.679 -1.173 0.24294
## CountryETH -6.880 3.640 -1.890 0.06083 .
## CountryGUI -7.530 2.659 -2.832 0.00530 **
## CountryGHA -7.530 2.645 -2.847 0.00507 **
## CountryBKF -7.429 2.604 -2.853 0.00498 **
## CountryZIM -5.850 2.700 -2.167 0.03193 *
## ---
## Signif. codes: 0 '***' 0.001 '**' 0.01 '*' 0.05 '.' 0.1 ' ' 1
##
## (Dispersion parameter for gaussian family taken to be 6.626342)
##
## Null deviance: 1299.26 on 155 degrees of freedom
## Residual deviance: 934.31 on 141 degrees of freedom
## AIC: 753.94
##
## Number of Fisher Scoring iterations: 2

data$Country <- relevel(data$Country, ref= "ZIM")
model1<-glm((Prev_TcTsg) ~ Country,data=data, family=gaussian())
summary(model1)

##
## Call:
## glm(formula = (Prev_TcTsg) ~ Country, family = gaussian(), data = data)
##
## Deviance Residuals:
## Min 1Q Median 3Q Max
## -4.6633 -0.1012 0.0000 0.0000 16.4667
##
## Coefficients:
## Estimate Std. Error t value Pr(>|t|)
## (Intercept) 1.6800 0.8140 2.064 0.0409 *
## CountryZAM 5.8500 2.6998 2.167 0.0319 *
## CountrySAF -1.2250 1.2210 -1.003 0.3175
## CountryUGA -1.4680 1.4099 -1.041 0.2996
## CountryURT 2.9833 1.3293 2.244 0.0264 *
## CountrySWA -1.6800 2.6998 -0.622 0.5348
## CountrySEN -1.6800 1.0509 -1.599 0.1121
## CountryZAI -1.6800 2.6998 -0.622 0.5348
## CountryMOZ -1.6800 1.9939 -0.843 0.4009
## CountryMLI -1.6800 1.0153 -1.655 0.1002
## CountryKEN 2.7083 1.1022 2.457 0.0152 *
## CountryETH -1.0300 2.6998 -0.382 0.7034
## CountryGUI -1.6800 1.0509 -1.599 0.1121
## CountryGHA -1.6800 1.0153 -1.655 0.1002
## CountryBKF -1.5788 0.9037 -1.747 0.0828 .
## ---
## Signif. codes: 0 '***' 0.001 '**' 0.01 '*' 0.05 '.' 0.1 ' ' 1
##
## (Dispersion parameter for gaussian family taken to be 6.626342)
##
## Null deviance: 1299.26 on 155 degrees of freedom
## Residual deviance: 934.31 on 141 degrees of freedom
## AIC: 753.94
##
## Number of Fisher Scoring iterations: 2

#======== Glm TvTz per country
data$Country <- relevel(data$Country, ref= "BKF")
model1<-glm((Prev_TvTz) ~ Country,data=data, family=gaussian())
summary(model1)

##
## Call:
## glm(formula = (Prev_TvTz) ~ Country, family = gaussian(), data = data)
##
## Deviance Residuals:
## Min 1Q Median 3Q Max
## -13.394 -0.480 -0.086 0.000 69.936
##
## Coefficients:
## Estimate Std. Error t value Pr(>|t|)
## (Intercept) 0.4800 1.3507 0.355 0.723
## CountryZIM -0.4800 3.1096 -0.154 0.878
## CountryZAM -0.4800 8.9598 -0.054 0.957
## CountrySAF -0.4800 3.4105 -0.141 0.888
## CountryUGA -0.4800 4.1851 -0.115 0.909
## CountryURT -0.2450 3.8601 -0.063 0.949
## CountrySWA -0.4800 8.9598 -0.054 0.957
## CountrySEN 1.0333 2.6561 0.389 0.698
## CountryZAI -0.4800 8.9598 -0.054 0.957
## CountryMOZ -0.4800 6.4071 -0.075 0.940
## CountryMLI -0.4800 2.4866 -0.193 0.847
## CountryKEN -0.3942 2.8918 -0.136 0.892
## CountryETH -0.4800 8.9598 -0.054 0.957
## CountryGUI -0.4800 2.6561 -0.181 0.857
## CountryGHA 12.9139 2.4866 5.193 7.08e-07 ***
## ---
## Signif. codes: 0 '***' 0.001 '**' 0.01 '*' 0.05 '.' 0.1 ' ' 1
##
## (Dispersion parameter for gaussian family taken to be 78.45348)
##
## Null deviance: 13808 on 155 degrees of freedom
## Residual deviance: 11062 on 141 degrees of freedom
## AIC: 1139.5
##
## Number of Fisher Scoring iterations: 2

data$Country <- relevel(data$Country, ref= "GHA")
model1<-glm((Prev_TvTz) ~ Country,data=data, family=gaussian())
summary(model1)

##
## Call:
## glm(formula = (Prev_TvTz) ~ Country, family = gaussian(), data = data)
##
## Deviance Residuals:
## Min 1Q Median 3Q Max
## -13.394 -0.480 -0.086 0.000 69.936
##
## Coefficients:
## Estimate Std. Error t value Pr(>|t|)
## (Intercept) 13.394 2.088 6.416 1.98e-09 ***
## CountryBKF -12.914 2.487 -5.193 7.08e-07 ***
## CountryZIM -13.394 3.493 -3.834 0.000189 ***
## CountryZAM -13.394 9.100 -1.472 0.143293
## CountrySAF -13.394 3.764 -3.559 0.000508 ***
## CountryUGA -13.394 4.478 -2.991 0.003280 **
## CountryURT -13.159 4.175 -3.152 0.001984 **
## CountrySWA -13.394 9.100 -1.472 0.143293
## CountrySEN -11.881 3.097 -3.837 0.000188 ***
## CountryZAI -13.394 9.100 -1.472 0.143293
## CountryMOZ -13.394 6.602 -2.029 0.044362 *
## CountryMLI -13.394 2.952 -4.537 1.21e-05 ***
## CountryKEN -13.308 3.301 -4.032 9.03e-05 ***
## CountryETH -13.394 9.100 -1.472 0.143293
## CountryGUI -13.394 3.097 -4.325 2.86e-05 ***
## ---
## Signif. codes: 0 '***' 0.001 '**' 0.01 '*' 0.05 '.' 0.1 ' ' 1
##
## (Dispersion parameter for gaussian family taken to be 78.45348)
##
## Null deviance: 13808 on 155 degrees of freedom
## Residual deviance: 11062 on 141 degrees of freedom
## AIC: 1139.5
##
## Number of Fisher Scoring iterations: 2

data$Country <- relevel(data$Country, ref= "GUI")
model1<-glm((Prev_TvTz) ~ Country,data=data, family=gaussian())
summary(model1)

##
## Call:
## glm(formula = (Prev_TvTz) ~ Country, family = gaussian(), data = data)
##
## Deviance Residuals:
## Min 1Q Median 3Q Max
## -13.394 -0.480 -0.086 0.000 69.936
##
## Coefficients:
## Estimate Std. Error t value Pr(>|t|)
## (Intercept) 1.991e-15 2.287e+00 0.000 1.000
## CountryGHA 1.339e+01 3.097e+00 4.325 2.86e-05 ***
## CountryBKF 4.800e-01 2.656e+00 0.181 0.857
## CountryZIM -9.384e-16 3.616e+00 0.000 1.000
## CountryZAM -9.099e-16 9.148e+00 0.000 1.000
## CountrySAF -1.854e-15 3.878e+00 0.000 1.000
## CountryUGA -2.235e-15 4.574e+00 0.000 1.000
## CountryURT 2.350e-01 4.279e+00 0.055 0.956
## CountrySWA -2.238e-16 9.148e+00 0.000 1.000
## CountrySEN 1.513e+00 3.234e+00 0.468 0.641
## CountryZAI -1.418e-15 9.148e+00 0.000 1.000
## CountryMOZ -1.136e-15 6.668e+00 0.000 1.000
## CountryMLI -1.794e-15 3.097e+00 0.000 1.000
## CountryKEN 8.583e-02 3.430e+00 0.025 0.980
## CountryETH -2.236e-15 9.148e+00 0.000 1.000
## ---
## Signif. codes: 0 '***' 0.001 '**' 0.01 '*' 0.05 '.' 0.1 ' ' 1
##
## (Dispersion parameter for gaussian family taken to be 78.45348)
##
## Null deviance: 13808 on 155 degrees of freedom
## Residual deviance: 11062 on 141 degrees of freedom
## AIC: 1139.5
##
## Number of Fisher Scoring iterations: 2

data$Country <- relevel(data$Country, ref= "ETH")
model1<-glm((Prev_TvTz) ~ Country,data=data, family=gaussian())
summary(model1)

##
## Call:
## glm(formula = (Prev_TvTz) ~ Country, family = gaussian(), data = data)
##
## Deviance Residuals:
## Min 1Q Median 3Q Max
## -13.394 -0.480 -0.086 0.000 69.936
##
## Coefficients:
## Estimate Std. Error t value Pr(>|t|)
## (Intercept) 9.020e-15 8.857e+00 0.000 1.000
## CountryGUI -5.066e-15 9.148e+00 0.000 1.000
## CountryGHA 1.339e+01 9.100e+00 1.472 0.143
## CountryBKF 4.800e-01 8.960e+00 0.054 0.957
## CountryZIM -9.356e-15 9.290e+00 0.000 1.000
## CountryZAM -9.787e-15 1.253e+01 0.000 1.000
## CountrySAF -1.187e-14 9.395e+00 0.000 1.000
## CountryUGA -1.089e-14 9.703e+00 0.000 1.000
## CountryURT 2.350e-01 9.567e+00 0.025 0.980
## CountrySWA -9.925e-15 1.253e+01 0.000 1.000
## CountrySEN 1.513e+00 9.148e+00 0.165 0.869
## CountryZAI -9.733e-15 1.253e+01 0.000 1.000
## CountryMOZ -1.060e-14 1.085e+01 0.000 1.000
## CountryMLI -9.415e-15 9.100e+00 0.000 1.000
## CountryKEN 8.583e-02 9.219e+00 0.009 0.993
##
## (Dispersion parameter for gaussian family taken to be 78.45348)
##
## Null deviance: 13808 on 155 degrees of freedom
## Residual deviance: 11062 on 141 degrees of freedom
## AIC: 1139.5
##
## Number of Fisher Scoring iterations: 2

data$Country <- relevel(data$Country, ref= "KEN")
model1<-glm((Prev_TvTz) ~ Country,data=data, family=gaussian())
summary(model1)

##
## Call:
## glm(formula = (Prev_TvTz) ~ Country, family = gaussian(), data = data)
##
## Deviance Residuals:
## Min 1Q Median 3Q Max
## -13.394 -0.480 -0.086 0.000 69.936
##
## Coefficients:
## Estimate Std. Error t value Pr(>|t|)
## (Intercept) 0.08583 2.55691 0.034 0.973
## CountryETH -0.08583 9.21907 -0.009 0.993
## CountryGUI -0.08583 3.43046 -0.025 0.980
## CountryGHA 13.30806 3.30096 4.032 9.03e-05 ***
## CountryBKF 0.39417 2.89176 0.136 0.892
## CountryZIM -0.08583 3.79251 -0.023 0.982
## CountryZAM -0.08583 9.21907 -0.009 0.993
## CountrySAF -0.08583 4.04283 -0.021 0.983
## CountryUGA -0.08583 4.71471 -0.018 0.986
## CountryURT 0.14917 4.42870 0.034 0.973
## CountrySWA -0.08583 9.21907 -0.009 0.993
## CountrySEN 1.42750 3.43046 0.416 0.678
## CountryZAI -0.08583 9.21907 -0.009 0.993
## CountryMOZ -0.08583 6.76495 -0.013 0.990
## CountryMLI -0.08583 3.30096 -0.026 0.979
## ---
## Signif. codes: 0 '***' 0.001 '**' 0.01 '*' 0.05 '.' 0.1 ' ' 1
##
## (Dispersion parameter for gaussian family taken to be 78.45348)
##
## Null deviance: 13808 on 155 degrees of freedom
## Residual deviance: 11062 on 141 degrees of freedom
## AIC: 1139.5
##
## Number of Fisher Scoring iterations: 2

data$Country <- relevel(data$Country, ref= "MLI")
model1<-glm((Prev_TvTz) ~ Country,data=data, family=gaussian())
summary(model1)

##
## Call:
## glm(formula = (Prev_TvTz) ~ Country, family = gaussian(), data = data)
##
## Deviance Residuals:
## Min 1Q Median 3Q Max
## -13.394 -0.480 -0.086 0.000 69.936
##
## Coefficients:
## Estimate Std. Error t value Pr(>|t|)
## (Intercept) 7.044e-16 2.088e+00 0.000 1.000
## CountryKEN 8.583e-02 3.301e+00 0.026 0.979
## CountryETH 2.829e-14 9.100e+00 0.000 1.000
## CountryGUI -4.363e-15 3.097e+00 0.000 1.000
## CountryGHA 1.339e+01 2.952e+00 4.537 1.21e-05 ***
## CountryBKF 4.800e-01 2.487e+00 0.193 0.847
## CountryZIM 1.089e-15 3.493e+00 0.000 1.000
## CountryZAM -1.762e-15 9.100e+00 0.000 1.000
## CountrySAF 8.197e-16 3.764e+00 0.000 1.000
## CountryUGA 1.967e-15 4.478e+00 0.000 1.000
## CountryURT 2.350e-01 4.175e+00 0.056 0.955
## CountrySWA 1.013e-15 9.100e+00 0.000 1.000
## CountrySEN 1.513e+00 3.097e+00 0.489 0.626
## CountryZAI 5.999e-16 9.100e+00 0.000 1.000
## CountryMOZ 3.103e-16 6.602e+00 0.000 1.000
## ---
## Signif. codes: 0 '***' 0.001 '**' 0.01 '*' 0.05 '.' 0.1 ' ' 1
##
## (Dispersion parameter for gaussian family taken to be 78.45348)
##
## Null deviance: 13808 on 155 degrees of freedom
## Residual deviance: 11062 on 141 degrees of freedom
## AIC: 1139.5
##
## Number of Fisher Scoring iterations: 2

data$Country <- relevel(data$Country, ref= "MOZ")
model1<-glm((Prev_TvTz) ~ Country,data=data, family=gaussian())
summary(model1)

##
## Call:
## glm(formula = (Prev_TvTz) ~ Country, family = gaussian(), data = data)
##
## Deviance Residuals:
## Min 1Q Median 3Q Max
## -13.394 -0.480 -0.086 0.000 69.936
##
## Coefficients:
## Estimate Std. Error t value Pr(>|t|)
## (Intercept) 2.569e-15 6.263e+00 0.000 1.0000
## CountryMLI -1.635e-15 6.602e+00 0.000 1.0000
## CountryKEN 8.583e-02 6.765e+00 0.013 0.9899
## CountryETH -2.195e-14 1.085e+01 0.000 1.0000
## CountryGUI -8.312e-15 6.668e+00 0.000 1.0000
## CountryGHA 1.339e+01 6.602e+00 2.029 0.0444 *
## CountryBKF 4.800e-01 6.407e+00 0.075 0.9404
## CountryZIM -3.063e-15 6.861e+00 0.000 1.0000
## CountryZAM -4.752e-15 1.085e+01 0.000 1.0000
## CountrySAF -3.912e-15 7.002e+00 0.000 1.0000
## CountryUGA -5.976e-15 7.411e+00 0.000 1.0000
## CountryURT 2.350e-01 7.232e+00 0.032 0.9741
## CountrySWA -3.878e-15 1.085e+01 0.000 1.0000
## CountrySEN 1.513e+00 6.668e+00 0.227 0.8208
## CountryZAI -4.147e-15 1.085e+01 0.000 1.0000
## ---
## Signif. codes: 0 '***' 0.001 '**' 0.01 '*' 0.05 '.' 0.1 ' ' 1
##
## (Dispersion parameter for gaussian family taken to be 78.45348)
##
## Null deviance: 13808 on 155 degrees of freedom
## Residual deviance: 11062 on 141 degrees of freedom
## AIC: 1139.5
##
## Number of Fisher Scoring iterations: 2

data$Country <- relevel(data$Country, ref= "ZAI")
model1<-glm((Prev_TvTz) ~ Country,data=data, family=gaussian())
summary(model1)

##
## Call:
## glm(formula = (Prev_TvTz) ~ Country, family = gaussian(), data = data)
##
## Deviance Residuals:
## Min 1Q Median 3Q Max
## -13.394 -0.480 -0.086 0.000 69.936
##
## Coefficients:
## Estimate Std. Error t value Pr(>|t|)
## (Intercept) 1.867e-14 8.857e+00 0.000 1.000
## CountryMOZ -1.760e-14 1.085e+01 0.000 1.000
## CountryMLI -1.961e-14 9.100e+00 0.000 1.000
## CountryKEN 8.583e-02 9.219e+00 0.009 0.993
## CountryETH -1.037e-14 1.253e+01 0.000 1.000
## CountryGUI -1.371e-14 9.148e+00 0.000 1.000
## CountryGHA 1.339e+01 9.100e+00 1.472 0.143
## CountryBKF 4.800e-01 8.960e+00 0.054 0.957
## CountryZIM -1.942e-14 9.290e+00 0.000 1.000
## CountryZAM -2.245e-14 1.253e+01 0.000 1.000
## CountrySAF -2.159e-14 9.395e+00 0.000 1.000
## CountryUGA -2.163e-14 9.703e+00 0.000 1.000
## CountryURT 2.350e-01 9.567e+00 0.025 0.980
## CountrySWA -2.266e-14 1.253e+01 0.000 1.000
## CountrySEN 1.513e+00 9.148e+00 0.165 0.869
##
## (Dispersion parameter for gaussian family taken to be 78.45348)
##
## Null deviance: 13808 on 155 degrees of freedom
## Residual deviance: 11062 on 141 degrees of freedom
## AIC: 1139.5
##
## Number of Fisher Scoring iterations: 2

data$Country <- relevel(data$Country, ref= "SEN")
model1<-glm((Prev_TvTz) ~ Country,data=data, family=gaussian())
summary(model1)

##
## Call:
## glm(formula = (Prev_TvTz) ~ Country, family = gaussian(), data = data)
##
## Deviance Residuals:
## Min 1Q Median 3Q Max
## -13.394 -0.480 -0.086 0.000 69.936
##
## Coefficients:
## Estimate Std. Error t value Pr(>|t|)
## (Intercept) 1.513 2.287 0.662 0.509231
## CountryZAI -1.513 9.148 -0.165 0.868843
## CountryMOZ -1.513 6.668 -0.227 0.820777
## CountryMLI -1.513 3.097 -0.489 0.625805
## CountryKEN -1.427 3.430 -0.416 0.677951
## CountryETH -1.513 9.148 -0.165 0.868843
## CountryGUI -1.513 3.234 -0.468 0.640574
## CountryGHA 11.881 3.097 3.837 0.000188 ***
## CountryBKF -1.033 2.656 -0.389 0.697830
## CountryZIM -1.513 3.616 -0.419 0.676212
## CountryZAM -1.513 9.148 -0.165 0.868843
## CountrySAF -1.513 3.878 -0.390 0.696932
## CountryUGA -1.513 4.574 -0.331 0.741241
## CountryURT -1.278 4.279 -0.299 0.765549
## CountrySWA -1.513 9.148 -0.165 0.868843
## ---
## Signif. codes: 0 '***' 0.001 '**' 0.01 '*' 0.05 '.' 0.1 ' ' 1
##
## (Dispersion parameter for gaussian family taken to be 78.45348)
##
## Null deviance: 13808 on 155 degrees of freedom
## Residual deviance: 11062 on 141 degrees of freedom
## AIC: 1139.5
##
## Number of Fisher Scoring iterations: 2

data$Country <- relevel(data$Country, ref= "SWA")
model1<-glm((Prev_TvTz) ~ Country,data=data, family=gaussian())
summary(model1)

##
## Call:
## glm(formula = (Prev_TvTz) ~ Country, family = gaussian(), data = data)
##
## Deviance Residuals:
## Min 1Q Median 3Q Max
## -13.394 -0.480 -0.086 0.000 69.936
##
## Coefficients:
## Estimate Std. Error t value Pr(>|t|)
## (Intercept) 1.476e-15 8.857e+00 0.000 1.000
## CountrySEN 1.513e+00 9.148e+00 0.165 0.869
## CountryZAI -4.630e-15 1.253e+01 0.000 1.000
## CountryMOZ -1.373e-15 1.085e+01 0.000 1.000
## CountryMLI 3.087e-16 9.100e+00 0.000 1.000
## CountryKEN 8.583e-02 9.219e+00 0.009 0.993
## CountryETH 4.353e-15 1.253e+01 0.000 1.000
## CountryGUI -3.957e-15 9.148e+00 0.000 1.000
## CountryGHA 1.339e+01 9.100e+00 1.472 0.143
## CountryBKF 4.800e-01 8.960e+00 0.054 0.957
## CountryZIM -2.172e-15 9.290e+00 0.000 1.000
## CountryZAM 7.878e-15 1.253e+01 0.000 1.000
## CountrySAF -6.047e-16 9.395e+00 0.000 1.000
## CountryUGA -3.640e-15 9.703e+00 0.000 1.000
## CountryURT 2.350e-01 9.567e+00 0.025 0.980
##
## (Dispersion parameter for gaussian family taken to be 78.45348)
##
## Null deviance: 13808 on 155 degrees of freedom
## Residual deviance: 11062 on 141 degrees of freedom
## AIC: 1139.5
##
## Number of Fisher Scoring iterations: 2

data$Country <- relevel(data$Country, ref= "URT")
model1<-glm((Prev_TvTz) ~ Country,data=data, family=gaussian())
summary(model1)

##
## Call:
## glm(formula = (Prev_TvTz) ~ Country, family = gaussian(), data = data)
##
## Deviance Residuals:
## Min 1Q Median 3Q Max
## -13.394 -0.480 -0.086 0.000 69.936
##
## Coefficients:
## Estimate Std. Error t value Pr(>|t|)
## (Intercept) 0.2350 3.6160 0.065 0.94828
## CountrySWA -0.2350 9.5671 -0.025 0.98044
## CountrySEN 1.2783 4.2785 0.299 0.76555
## CountryZAI -0.2350 9.5671 -0.025 0.98044
## CountryMOZ -0.2350 7.2320 -0.032 0.97412
## CountryMLI -0.2350 4.1754 -0.056 0.95520
## CountryKEN -0.1492 4.4287 -0.034 0.97318
## CountryETH -0.2350 9.5671 -0.025 0.98044
## CountryGUI -0.2350 4.2785 -0.055 0.95628
## CountryGHA 13.1589 4.1754 3.152 0.00198 **
## CountryBKF 0.2450 3.8601 0.063 0.94948
## CountryZIM -0.2350 4.5739 -0.051 0.95910
## CountryZAM -0.2350 9.5671 -0.025 0.98044
## CountrySAF -0.2350 4.7835 -0.049 0.96089
## CountryUGA -0.2350 5.3634 -0.044 0.96511
## ---
## Signif. codes: 0 '***' 0.001 '**' 0.01 '*' 0.05 '.' 0.1 ' ' 1
##
## (Dispersion parameter for gaussian family taken to be 78.45348)
##
## Null deviance: 13808 on 155 degrees of freedom
## Residual deviance: 11062 on 141 degrees of freedom
## AIC: 1139.5
##
## Number of Fisher Scoring iterations: 2

data$Country <- relevel(data$Country, ref= "UGA")
model1<-glm((Prev_TvTz) ~ Country,data=data, family=gaussian())
summary(model1)

##
## Call:
## glm(formula = (Prev_TvTz) ~ Country, family = gaussian(), data = data)
##
## Deviance Residuals:
## Min 1Q Median 3Q Max
## -13.394 -0.480 -0.086 0.000 69.936
##
## Coefficients:
## Estimate Std. Error t value Pr(>|t|)
## (Intercept) 5.677e-15 3.961e+00 0.000 1.00000
## CountryURT 2.350e-01 5.363e+00 0.044 0.96511
## CountrySWA -4.985e-15 9.703e+00 0.000 1.00000
## CountrySEN 1.513e+00 4.574e+00 0.331 0.74124
## CountryZAI -7.804e-15 9.703e+00 0.000 1.00000
## CountryMOZ -7.172e-15 7.411e+00 0.000 1.00000
## CountryMLI -8.049e-15 4.478e+00 0.000 1.00000
## CountryKEN 8.583e-02 4.715e+00 0.018 0.98550
## CountryETH -2.382e-15 9.703e+00 0.000 1.00000
## CountryGUI -3.980e-15 4.574e+00 0.000 1.00000
## CountryGHA 1.339e+01 4.478e+00 2.991 0.00328 **
## CountryBKF 4.800e-01 4.185e+00 0.115 0.90885
## CountryZIM -5.103e-15 4.851e+00 0.000 1.00000
## CountryZAM 3.876e-15 9.703e+00 0.000 1.00000
## CountrySAF -3.623e-15 5.049e+00 0.000 1.00000
## ---
## Signif. codes: 0 '***' 0.001 '**' 0.01 '*' 0.05 '.' 0.1 ' ' 1
##
## (Dispersion parameter for gaussian family taken to be 78.45348)
##
## Null deviance: 13808 on 155 degrees of freedom
## Residual deviance: 11062 on 141 degrees of freedom
## AIC: 1139.5
##
## Number of Fisher Scoring iterations: 2

data$Country <- relevel(data$Country, ref= "SAF")
model1<-glm((Prev_TvTz) ~ Country,data=data, family=gaussian())
summary(model1)

##
## Call:
## glm(formula = (Prev_TvTz) ~ Country, family = gaussian(), data = data)
##
## Deviance Residuals:
## Min 1Q Median 3Q Max
## -13.394 -0.480 -0.086 0.000 69.936
##
## Coefficients:
## Estimate Std. Error t value Pr(>|t|)
## (Intercept) 1.565e-15 3.132e+00 0.000 1.000000
## CountryUGA 1.221e-15 5.049e+00 0.000 1.000000
## CountryURT 2.350e-01 4.784e+00 0.049 0.960888
## CountrySWA 6.406e-16 9.395e+00 0.000 1.000000
## CountrySEN 1.513e+00 3.878e+00 0.390 0.696932
## CountryZAI 3.824e-15 9.395e+00 0.000 1.000000
## CountryMOZ -1.667e-16 7.002e+00 0.000 1.000000
## CountryMLI -2.586e-15 3.764e+00 0.000 1.000000
## CountryKEN 8.583e-02 4.043e+00 0.021 0.983091
## CountryETH 1.305e-14 9.395e+00 0.000 1.000000
## CountryGUI 3.499e-15 3.878e+00 0.000 1.000000
## CountryGHA 1.339e+01 3.764e+00 3.559 0.000508 ***
## CountryBKF 4.800e-01 3.410e+00 0.141 0.888273
## CountryZIM -2.427e-15 4.201e+00 0.000 1.000000
## CountryZAM 3.179e-15 9.395e+00 0.000 1.000000
## ---
## Signif. codes: 0 '***' 0.001 '**' 0.01 '*' 0.05 '.' 0.1 ' ' 1
##
## (Dispersion parameter for gaussian family taken to be 78.45348)
##
## Null deviance: 13808 on 155 degrees of freedom
## Residual deviance: 11062 on 141 degrees of freedom
## AIC: 1139.5
##
## Number of Fisher Scoring iterations: 2

data$Country <- relevel(data$Country, ref= "ZAM")
model1<-glm((Prev_TvTz) ~ Country,data=data, family=gaussian())
summary(model1)

##
## Call:
## glm(formula = (Prev_TvTz) ~ Country, family = gaussian(), data = data)
##
## Deviance Residuals:
## Min 1Q Median 3Q Max
## -13.394 -0.480 -0.086 0.000 69.936
##
## Coefficients:
## Estimate Std. Error t value Pr(>|t|)
## (Intercept) 3.835e-14 8.857e+00 0.000 1.000
## CountrySAF -3.678e-14 9.395e+00 0.000 1.000
## CountryUGA -3.386e-14 9.703e+00 0.000 1.000
## CountryURT 2.350e-01 9.567e+00 0.025 0.980
## CountrySWA -3.875e-14 1.253e+01 0.000 1.000
## CountrySEN 1.513e+00 9.148e+00 0.165 0.869
## CountryZAI -4.028e-14 1.253e+01 0.000 1.000
## CountryMOZ -4.177e-14 1.085e+01 0.000 1.000
## CountryMLI -3.875e-14 9.100e+00 0.000 1.000
## CountryKEN 8.583e-02 9.219e+00 0.009 0.993
## CountryETH -4.546e-14 1.253e+01 0.000 1.000
## CountryGUI -3.832e-14 9.148e+00 0.000 1.000
## CountryGHA 1.339e+01 9.100e+00 1.472 0.143
## CountryBKF 4.800e-01 8.960e+00 0.054 0.957
## CountryZIM -3.656e-14 9.290e+00 0.000 1.000
##
## (Dispersion parameter for gaussian family taken to be 78.45348)
##
## Null deviance: 13808 on 155 degrees of freedom
## Residual deviance: 11062 on 141 degrees of freedom
## AIC: 1139.5
##
## Number of Fisher Scoring iterations: 2

data$Country <- relevel(data$Country, ref= "ZIM")
model1<-glm((Prev_TvTz) ~ Country,data=data, family=gaussian())
summary(model1)

##
## Call:
## glm(formula = (Prev_TvTz) ~ Country, family = gaussian(), data = data)
##
## Deviance Residuals:
## Min 1Q Median 3Q Max
## -13.394 -0.480 -0.086 0.000 69.936
##
## Coefficients:
## Estimate Std. Error t value Pr(>|t|)
## (Intercept) -3.951e-16 2.801e+00 0.000 1.000000
## CountryZAM -6.294e-15 9.290e+00 0.000 1.000000
## CountrySAF -5.800e-16 4.201e+00 0.000 1.000000
## CountryUGA 1.167e-15 4.851e+00 0.000 1.000000
## CountryURT 2.350e-01 4.574e+00 0.051 0.959097
## CountrySWA 1.059e-15 9.290e+00 0.000 1.000000
## CountrySEN 1.513e+00 3.616e+00 0.419 0.676212
## CountryZAI -5.622e-15 9.290e+00 0.000 1.000000
## CountryMOZ 4.382e-15 6.861e+00 0.000 1.000000
## CountryMLI -1.316e-16 3.493e+00 0.000 1.000000
## CountryKEN 8.583e-02 3.793e+00 0.023 0.981976
## CountryETH -8.040e-15 9.290e+00 0.000 1.000000
## CountryGUI 0.000e+00 3.616e+00 0.000 1.000000
## CountryGHA 1.339e+01 3.493e+00 3.834 0.000189 ***
## CountryBKF 4.800e-01 3.110e+00 0.154 0.877548
## ---
## Signif. codes: 0 '***' 0.001 '**' 0.01 '*' 0.05 '.' 0.1 ' ' 1
##
## (Dispersion parameter for gaussian family taken to be 78.45348)
##
## Null deviance: 13808 on 155 degrees of freedom
## Residual deviance: 11062 on 141 degrees of freedom
## AIC: 1139.5
##
## Number of Fisher Scoring iterations: 2

#======== Glm TvTsg per country
data$Country <- relevel(data$Country, ref= "BKF")
model1<-glm((Prev_TvTsg) ~ Country,data=data, family=gaussian())
summary(model1)

##
## Call:
## glm(formula = (Prev_TvTsg) ~ Country, family = gaussian(), data = data)
##
## Deviance Residuals:
## Min 1Q Median 3Q Max
## -6.536 -0.104 0.000 0.000 60.134
##
## Coefficients:
## Estimate Std. Error t value Pr(>|t|)
## (Intercept) 6.536 1.141 5.729 5.87e-08 ***
## CountryZIM -6.536 2.626 -2.489 0.01399 *
## CountryZAM -6.536 7.567 -0.864 0.38921
## CountrySAF -6.536 2.880 -2.269 0.02478 *
## CountryUGA -6.536 3.535 -1.849 0.06654 .
## CountryURT -5.394 3.260 -1.655 0.10022
## CountrySWA -6.536 7.567 -0.864 0.38921
## CountrySEN -6.536 2.243 -2.914 0.00416 **
## CountryZAI -6.536 7.567 -0.864 0.38921
## CountryMOZ -5.536 5.411 -1.023 0.30804
## CountryMLI -6.536 2.100 -3.112 0.00225 **
## CountryKEN -6.432 2.442 -2.633 0.00940 **
## CountryETH -6.096 7.567 -0.806 0.42185
## CountryGUI -6.536 2.243 -2.914 0.00416 **
## CountryGHA -6.536 2.100 -3.112 0.00225 **
## ---
## Signif. codes: 0 '***' 0.001 '**' 0.01 '*' 0.05 '.' 0.1 ' ' 1
##
## (Dispersion parameter for gaussian family taken to be 55.96374)
##
## Null deviance: 9193.0 on 155 degrees of freedom
## Residual deviance: 7890.9 on 141 degrees of freedom
## AIC: 1086.8
##
## Number of Fisher Scoring iterations: 2

data$Country <- relevel(data$Country, ref= "GHA")
model1<-glm((Prev_TvTsg) ~ Country,data=data, family=gaussian())
summary(model1)

##
## Call:
## glm(formula = (Prev_TvTsg) ~ Country, family = gaussian(), data = data)
##
## Deviance Residuals:
## Min 1Q Median 3Q Max
## -6.536 -0.104 0.000 0.000 60.134
##
## Coefficients:
## Estimate Std. Error t value Pr(>|t|)
## (Intercept) 3.413e-15 1.763e+00 0.000 1.00000
## CountryBKF 6.536e+00 2.100e+00 3.112 0.00225 **
## CountryZIM -6.966e-15 2.951e+00 0.000 1.00000
## CountryZAM -4.867e-15 7.686e+00 0.000 1.00000
## CountrySAF -4.669e-15 3.179e+00 0.000 1.00000
## CountryUGA -4.758e-15 3.782e+00 0.000 1.00000
## CountryURT 1.142e+00 3.527e+00 0.324 0.74662
## CountrySWA -9.123e-15 7.686e+00 0.000 1.00000
## CountrySEN -5.532e-15 2.615e+00 0.000 1.00000
## CountryZAI -3.625e-14 7.686e+00 0.000 1.00000
## CountryMOZ 1.000e+00 5.576e+00 0.179 0.85793
## CountryMLI -6.984e-15 2.494e+00 0.000 1.00000
## CountryKEN 1.042e-01 2.788e+00 0.037 0.97025
## CountryETH 4.400e-01 7.686e+00 0.057 0.95443
## CountryGUI -5.822e-15 2.615e+00 0.000 1.00000
## ---
## Signif. codes: 0 '***' 0.001 '**' 0.01 '*' 0.05 '.' 0.1 ' ' 1
##
## (Dispersion parameter for gaussian family taken to be 55.96374)
##
## Null deviance: 9193.0 on 155 degrees of freedom
## Residual deviance: 7890.9 on 141 degrees of freedom
## AIC: 1086.8
##
## Number of Fisher Scoring iterations: 2

data$Country <- relevel(data$Country, ref= "GUI")
model1<-glm((Prev_TvTsg) ~ Country,data=data, family=gaussian())
summary(model1)

##
## Call:
## glm(formula = (Prev_TvTsg) ~ Country, family = gaussian(), data = data)
##
## Deviance Residuals:
## Min 1Q Median 3Q Max
## -6.536 -0.104 0.000 0.000 60.134
##
## Coefficients:
## Estimate Std. Error t value Pr(>|t|)
## (Intercept) 2.635e-15 1.932e+00 0.000 1.00000
## CountryGHA -3.116e-15 2.615e+00 0.000 1.00000
## CountryBKF 6.536e+00 2.243e+00 2.914 0.00416 **
## CountryZIM -2.345e-15 3.054e+00 0.000 1.00000
## CountryZAM -2.158e-15 7.726e+00 0.000 1.00000
## CountrySAF -1.999e-15 3.275e+00 0.000 1.00000
## CountryUGA -3.262e-15 3.863e+00 0.000 1.00000
## CountryURT 1.142e+00 3.614e+00 0.316 0.75252
## CountrySWA -5.779e-15 7.726e+00 0.000 1.00000
## CountrySEN -3.424e-15 2.732e+00 0.000 1.00000
## CountryZAI 1.445e-14 7.726e+00 0.000 1.00000
## CountryMOZ 1.000e+00 5.631e+00 0.178 0.85931
## CountryMLI 5.031e-16 2.615e+00 0.000 1.00000
## CountryKEN 1.042e-01 2.897e+00 0.036 0.97137
## CountryETH 4.400e-01 7.726e+00 0.057 0.95467
## ---
## Signif. codes: 0 '***' 0.001 '**' 0.01 '*' 0.05 '.' 0.1 ' ' 1
##
## (Dispersion parameter for gaussian family taken to be 55.96374)
##
## Null deviance: 9193.0 on 155 degrees of freedom
## Residual deviance: 7890.9 on 141 degrees of freedom
## AIC: 1086.8
##
## Number of Fisher Scoring iterations: 2

data$Country <- relevel(data$Country, ref= "ETH")
model1<-glm((Prev_TvTsg) ~ Country,data=data, family=gaussian())
summary(model1)

##
## Call:
## glm(formula = (Prev_TvTsg) ~ Country, family = gaussian(), data = data)
##
## Deviance Residuals:
## Min 1Q Median 3Q Max
## -6.536 -0.104 0.000 0.000 60.134
##
## Coefficients:
## Estimate Std. Error t value Pr(>|t|)
## (Intercept) 0.4400 7.4809 0.059 0.953
## CountryGUI -0.4400 7.7262 -0.057 0.955
## CountryGHA -0.4400 7.6859 -0.057 0.954
## CountryBKF 6.0960 7.5674 0.806 0.422
## CountryZIM -0.4400 7.8460 -0.056 0.955
## CountryZAM -0.4400 10.5796 -0.042 0.967
## CountrySAF -0.4400 7.9347 -0.055 0.956
## CountryUGA -0.4400 8.1949 -0.054 0.957
## CountryURT 0.7017 8.0803 0.087 0.931
## CountrySWA -0.4400 10.5796 -0.042 0.967
## CountrySEN -0.4400 7.7262 -0.057 0.955
## CountryZAI -0.4400 10.5796 -0.042 0.967
## CountryMOZ 0.5600 9.1622 0.061 0.951
## CountryMLI -0.4400 7.6859 -0.057 0.954
## CountryKEN -0.3358 7.7864 -0.043 0.966
##
## (Dispersion parameter for gaussian family taken to be 55.96374)
##
## Null deviance: 9193.0 on 155 degrees of freedom
## Residual deviance: 7890.9 on 141 degrees of freedom
## AIC: 1086.8
##
## Number of Fisher Scoring iterations: 2

data$Country <- relevel(data$Country, ref= "KEN")
model1<-glm((Prev_TvTsg) ~ Country,data=data, family=gaussian())
summary(model1)

##
## Call:
## glm(formula = (Prev_TvTsg) ~ Country, family = gaussian(), data = data)
##
## Deviance Residuals:
## Min 1Q Median 3Q Max
## -6.536 -0.104 0.000 0.000 60.134
##
## Coefficients:
## Estimate Std. Error t value Pr(>|t|)
## (Intercept) 0.1042 2.1595 0.048 0.9616
## CountryETH 0.3358 7.7864 0.043 0.9657
## CountryGUI -0.1042 2.8973 -0.036 0.9714
## CountryGHA -0.1042 2.7880 -0.037 0.9702
## CountryBKF 6.4319 2.4424 2.633 0.0094 **
## CountryZIM -0.1042 3.2031 -0.033 0.9741
## CountryZAM -0.1042 7.7864 -0.013 0.9893
## CountrySAF -0.1042 3.4145 -0.031 0.9757
## CountryUGA -0.1042 3.9820 -0.026 0.9792
## CountryURT 1.0375 3.7404 0.277 0.7819
## CountrySWA -0.1042 7.7864 -0.013 0.9893
## CountrySEN -0.1042 2.8973 -0.036 0.9714
## CountryZAI -0.1042 7.7864 -0.013 0.9893
## CountryMOZ 0.8958 5.7136 0.157 0.8756
## CountryMLI -0.1042 2.7880 -0.037 0.9702
## ---
## Signif. codes: 0 '***' 0.001 '**' 0.01 '*' 0.05 '.' 0.1 ' ' 1
##
## (Dispersion parameter for gaussian family taken to be 55.96374)
##
## Null deviance: 9193.0 on 155 degrees of freedom
## Residual deviance: 7890.9 on 141 degrees of freedom
## AIC: 1086.8
##
## Number of Fisher Scoring iterations: 2

data$Country <- relevel(data$Country, ref= "MLI")
model1<-glm((Prev_TvTsg) ~ Country,data=data, family=gaussian())
summary(model1)

##
## Call:
## glm(formula = (Prev_TvTsg) ~ Country, family = gaussian(), data = data)
##
## Deviance Residuals:
## Min 1Q Median 3Q Max
## -6.536 -0.104 0.000 0.000 60.134
##
## Coefficients:
## Estimate Std. Error t value Pr(>|t|)
## (Intercept) -2.697e-15 1.763e+00 0.000 1.00000
## CountryKEN 1.042e-01 2.788e+00 0.037 0.97025
## CountryETH 4.400e-01 7.686e+00 0.057 0.95443
## CountryGUI 6.453e-15 2.615e+00 0.000 1.00000
## CountryGHA 4.517e-15 2.494e+00 0.000 1.00000
## CountryBKF 6.536e+00 2.100e+00 3.112 0.00225 **
## CountryZIM 7.330e-15 2.951e+00 0.000 1.00000
## CountryZAM 7.386e-15 7.686e+00 0.000 1.00000
## CountrySAF 9.513e-15 3.179e+00 0.000 1.00000
## CountryUGA 5.246e-15 3.782e+00 0.000 1.00000
## CountryURT 1.142e+00 3.527e+00 0.324 0.74662
## CountrySWA 5.182e-15 7.686e+00 0.000 1.00000
## CountrySEN 5.356e-15 2.615e+00 0.000 1.00000
## CountryZAI 5.674e-15 7.686e+00 0.000 1.00000
## CountryMOZ 1.000e+00 5.576e+00 0.179 0.85793
## ---
## Signif. codes: 0 '***' 0.001 '**' 0.01 '*' 0.05 '.' 0.1 ' ' 1
##
## (Dispersion parameter for gaussian family taken to be 55.96374)
##
## Null deviance: 9193.0 on 155 degrees of freedom
## Residual deviance: 7890.9 on 141 degrees of freedom
## AIC: 1086.8
##
## Number of Fisher Scoring iterations: 2

data$Country <- relevel(data$Country, ref= "MOZ")
model1<-glm((Prev_TvTsg) ~ Country,data=data, family=gaussian())
summary(model1)

##
## Call:
## glm(formula = (Prev_TvTsg) ~ Country, family = gaussian(), data = data)
##
## Deviance Residuals:
## Min 1Q Median 3Q Max
## -6.536 -0.104 0.000 0.000 60.134
##
## Coefficients:
## Estimate Std. Error t value Pr(>|t|)
## (Intercept) 1.0000 5.2898 0.189 0.850
## CountryMLI -1.0000 5.5759 -0.179 0.858
## CountryKEN -0.8958 5.7136 -0.157 0.876
## CountryETH -0.5600 9.1622 -0.061 0.951
## CountryGUI -1.0000 5.6314 -0.178 0.859
## CountryGHA -1.0000 5.5759 -0.179 0.858
## CountryBKF 5.5360 5.4114 1.023 0.308
## CountryZIM -1.0000 5.7947 -0.173 0.863
## CountryZAM -1.0000 9.1622 -0.109 0.913
## CountrySAF -1.0000 5.9142 -0.169 0.866
## CountryUGA -1.0000 6.2590 -0.160 0.873
## CountryURT 0.1417 6.1081 0.023 0.982
## CountrySWA -1.0000 9.1622 -0.109 0.913
## CountrySEN -1.0000 5.6314 -0.178 0.859
## CountryZAI -1.0000 9.1622 -0.109 0.913
##
## (Dispersion parameter for gaussian family taken to be 55.96374)
##
## Null deviance: 9193.0 on 155 degrees of freedom
## Residual deviance: 7890.9 on 141 degrees of freedom
## AIC: 1086.8
##
## Number of Fisher Scoring iterations: 2

data$Country <- relevel(data$Country, ref= "ZAI")
model1<-glm((Prev_TvTsg) ~ Country,data=data, family=gaussian())
summary(model1)

##
## Call:
## glm(formula = (Prev_TvTsg) ~ Country, family = gaussian(), data = data)
##
## Deviance Residuals:
## Min 1Q Median 3Q Max
## -6.536 -0.104 0.000 0.000 60.134
##
## Coefficients:
## Estimate Std. Error t value Pr(>|t|)
## (Intercept) 6.801e-14 7.481e+00 0.000 1.000
## CountryMOZ 1.000e+00 9.162e+00 0.109 0.913
## CountryMLI -6.869e-14 7.686e+00 0.000 1.000
## CountryKEN 1.042e-01 7.786e+00 0.013 0.989
## CountryETH 4.400e-01 1.058e+01 0.042 0.967
## CountryGUI -6.621e-14 7.726e+00 0.000 1.000
## CountryGHA -6.834e-14 7.686e+00 0.000 1.000
## CountryBKF 6.536e+00 7.567e+00 0.864 0.389
## CountryZIM -6.617e-14 7.846e+00 0.000 1.000
## CountryZAM -1.372e-13 1.058e+01 0.000 1.000
## CountrySAF -6.079e-14 7.935e+00 0.000 1.000
## CountryUGA -6.251e-14 8.195e+00 0.000 1.000
## CountryURT 1.142e+00 8.080e+00 0.141 0.888
## CountrySWA -6.557e-14 1.058e+01 0.000 1.000
## CountrySEN -6.897e-14 7.726e+00 0.000 1.000
##
## (Dispersion parameter for gaussian family taken to be 55.96374)
##
## Null deviance: 9193.0 on 155 degrees of freedom
## Residual deviance: 7890.9 on 141 degrees of freedom
## AIC: 1086.8
##
## Number of Fisher Scoring iterations: 2

data$Country <- relevel(data$Country, ref= "SEN")
model1<-glm((Prev_TvTsg) ~ Country,data=data, family=gaussian())
summary(model1)

##
## Call:
## glm(formula = (Prev_TvTsg) ~ Country, family = gaussian(), data = data)
##
## Deviance Residuals:
## Min 1Q Median 3Q Max
## -6.536 -0.104 0.000 0.000 60.134
##
## Coefficients:
## Estimate Std. Error t value Pr(>|t|)
## (Intercept) -5.635e-15 1.932e+00 0.000 1.00000
## CountryZAI -4.202e-14 7.726e+00 0.000 1.00000
## CountryMOZ 1.000e+00 5.631e+00 0.178 0.85931
## CountryMLI 8.876e-15 2.615e+00 0.000 1.00000
## CountryKEN 1.042e-01 2.897e+00 0.036 0.97137
## CountryETH 4.400e-01 7.726e+00 0.057 0.95467
## CountryGUI 7.783e-15 2.732e+00 0.000 1.00000
## CountryGHA 5.509e-15 2.615e+00 0.000 1.00000
## CountryBKF 6.536e+00 2.243e+00 2.914 0.00416 **
## CountryZIM 8.371e-15 3.054e+00 0.000 1.00000
## CountryZAM -1.819e-14 7.726e+00 0.000 1.00000
## CountrySAF 1.109e-16 3.275e+00 0.000 1.00000
## CountryUGA 1.001e-14 3.863e+00 0.000 1.00000
## CountryURT 1.142e+00 3.614e+00 0.316 0.75252
## CountrySWA 5.275e-15 7.726e+00 0.000 1.00000
## ---
## Signif. codes: 0 '***' 0.001 '**' 0.01 '*' 0.05 '.' 0.1 ' ' 1
##
## (Dispersion parameter for gaussian family taken to be 55.96374)
##
## Null deviance: 9193.0 on 155 degrees of freedom
## Residual deviance: 7890.9 on 141 degrees of freedom
## AIC: 1086.8
##
## Number of Fisher Scoring iterations: 2

data$Country <- relevel(data$Country, ref= "SWA")
model1<-glm((Prev_TvTsg) ~ Country,data=data, family=gaussian())
summary(model1)

##
## Call:
## glm(formula = (Prev_TvTsg) ~ Country, family = gaussian(), data = data)
##
## Deviance Residuals:
## Min 1Q Median 3Q Max
## -6.536 -0.104 0.000 0.000 60.134
##
## Coefficients:
## Estimate Std. Error t value Pr(>|t|)
## (Intercept) 5.742e-14 7.481e+00 0.000 1.000
## CountrySEN -4.577e-14 7.726e+00 0.000 1.000
## CountryZAI -4.629e-14 1.058e+01 0.000 1.000
## CountryMOZ 1.000e+00 9.162e+00 0.109 0.913
## CountryMLI -5.995e-14 7.686e+00 0.000 1.000
## CountryKEN 1.042e-01 7.786e+00 0.013 0.989
## CountryETH 4.400e-01 1.058e+01 0.042 0.967
## CountryGUI -5.630e-14 7.726e+00 0.000 1.000
## CountryGHA -6.022e-14 7.686e+00 0.000 1.000
## CountryBKF 6.536e+00 7.567e+00 0.864 0.389
## CountryZIM -5.496e-14 7.846e+00 0.000 1.000
## CountryZAM -5.324e-14 1.058e+01 0.000 1.000
## CountrySAF -4.672e-14 7.935e+00 0.000 1.000
## CountryUGA -5.084e-14 8.195e+00 0.000 1.000
## CountryURT 1.142e+00 8.080e+00 0.141 0.888
##
## (Dispersion parameter for gaussian family taken to be 55.96374)
##
## Null deviance: 9193.0 on 155 degrees of freedom
## Residual deviance: 7890.9 on 141 degrees of freedom
## AIC: 1086.8
##
## Number of Fisher Scoring iterations: 2

data$Country <- relevel(data$Country, ref= "URT")
model1<-glm((Prev_TvTsg) ~ Country,data=data, family=gaussian())
summary(model1)

##
## Call:
## glm(formula = (Prev_TvTsg) ~ Country, family = gaussian(), data = data)
##
## Deviance Residuals:
## Min 1Q Median 3Q Max
## -6.536 -0.104 0.000 0.000 60.134
##
## Coefficients:
## Estimate Std. Error t value Pr(>|t|)
## (Intercept) 1.1417 3.0541 0.374 0.709
## CountrySWA -1.1417 8.0803 -0.141 0.888
## CountrySEN -1.1417 3.6136 -0.316 0.753
## CountryZAI -1.1417 8.0803 -0.141 0.888
## CountryMOZ -0.1417 6.1081 -0.023 0.982
## CountryMLI -1.1417 3.5265 -0.324 0.747
## CountryKEN -1.0375 3.7404 -0.277 0.782
## CountryETH -0.7017 8.0803 -0.087 0.931
## CountryGUI -1.1417 3.6136 -0.316 0.753
## CountryGHA -1.1417 3.5265 -0.324 0.747
## CountryBKF 5.3944 3.2602 1.655 0.100
## CountryZIM -1.1417 3.8631 -0.296 0.768
## CountryZAM -1.1417 8.0803 -0.141 0.888
## CountrySAF -1.1417 4.0401 -0.283 0.778
## CountryUGA -1.1417 4.5299 -0.252 0.801
##
## (Dispersion parameter for gaussian family taken to be 55.96374)
##
## Null deviance: 9193.0 on 155 degrees of freedom
## Residual deviance: 7890.9 on 141 degrees of freedom
## AIC: 1086.8
##
## Number of Fisher Scoring iterations: 2

data$Country <- relevel(data$Country, ref= "UGA")
model1<-glm((Prev_TvTsg) ~ Country,data=data, family=gaussian())
summary(model1)

##
## Call:
## glm(formula = (Prev_TvTsg) ~ Country, family = gaussian(), data = data)
##
## Deviance Residuals:
## Min 1Q Median 3Q Max
## -6.536 -0.104 0.000 0.000 60.134
##
## Coefficients:
## Estimate Std. Error t value Pr(>|t|)
## (Intercept) 2.818e-14 3.346e+00 0.000 1.0000
## CountryURT 1.142e+00 4.530e+00 0.252 0.8014
## CountrySWA -2.422e-14 8.195e+00 0.000 1.0000
## CountrySEN -2.735e-14 3.863e+00 0.000 1.0000
## CountryZAI -3.795e-14 8.195e+00 0.000 1.0000
## CountryMOZ 1.000e+00 6.259e+00 0.160 0.8733
## CountryMLI -2.995e-14 3.782e+00 0.000 1.0000
## CountryKEN 1.042e-01 3.982e+00 0.026 0.9792
## CountryETH 4.400e-01 8.195e+00 0.054 0.9573
## CountryGUI -2.101e-14 3.863e+00 0.000 1.0000
## CountryGHA -2.641e-14 3.782e+00 0.000 1.0000
## CountryBKF 6.536e+00 3.535e+00 1.849 0.0665 .
## CountryZIM -2.864e-14 4.097e+00 0.000 1.0000
## CountryZAM -1.832e-15 8.195e+00 0.000 1.0000
## CountrySAF -2.544e-14 4.265e+00 0.000 1.0000
## ---
## Signif. codes: 0 '***' 0.001 '**' 0.01 '*' 0.05 '.' 0.1 ' ' 1
##
## (Dispersion parameter for gaussian family taken to be 55.96374)
##
## Null deviance: 9193.0 on 155 degrees of freedom
## Residual deviance: 7890.9 on 141 degrees of freedom
## AIC: 1086.8
##
## Number of Fisher Scoring iterations: 2

data$Country <- relevel(data$Country, ref= "SAF")
model1<-glm((Prev_TvTsg) ~ Country,data=data, family=gaussian())
summary(model1)

##
## Call:
## glm(formula = (Prev_TvTsg) ~ Country, family = gaussian(), data = data)
##
## Deviance Residuals:
## Min 1Q Median 3Q Max
## -6.536 -0.104 0.000 0.000 60.134
##
## Coefficients:
## Estimate Std. Error t value Pr(>|t|)
## (Intercept) 4.031e-15 2.645e+00 0.000 1.0000
## CountryUGA 1.815e-14 4.265e+00 0.000 1.0000
## CountryURT 1.142e+00 4.040e+00 0.283 0.7779
## CountrySWA -1.675e-14 7.935e+00 0.000 1.0000
## CountrySEN -5.181e-15 3.275e+00 0.000 1.0000
## CountryZAI -4.942e-15 7.935e+00 0.000 1.0000
## CountryMOZ 1.000e+00 5.914e+00 0.169 0.8660
## CountryMLI -5.386e-15 3.179e+00 0.000 1.0000
## CountryKEN 1.042e-01 3.415e+00 0.031 0.9757
## CountryETH 4.400e-01 7.935e+00 0.055 0.9559
## CountryGUI 8.498e-15 3.275e+00 0.000 1.0000
## CountryGHA -6.658e-15 3.179e+00 0.000 1.0000
## CountryBKF 6.536e+00 2.880e+00 2.269 0.0248 *
## CountryZIM -1.167e-14 3.548e+00 0.000 1.0000
## CountryZAM -2.237e-15 7.935e+00 0.000 1.0000
## ---
## Signif. codes: 0 '***' 0.001 '**' 0.01 '*' 0.05 '.' 0.1 ' ' 1
##
## (Dispersion parameter for gaussian family taken to be 55.96374)
##
## Null deviance: 9193.0 on 155 degrees of freedom
## Residual deviance: 7890.9 on 141 degrees of freedom
## AIC: 1086.8
##
## Number of Fisher Scoring iterations: 2

data$Country <- relevel(data$Country, ref= "ZAM")
model1<-glm((Prev_TvTsg) ~ Country,data=data, family=gaussian())
summary(model1)

##
## Call:
## glm(formula = (Prev_TvTsg) ~ Country, family = gaussian(), data = data)
##
## Deviance Residuals:
## Min 1Q Median 3Q Max
## -6.536 -0.104 0.000 0.000 60.134
##
## Coefficients:
## Estimate Std. Error t value Pr(>|t|)
## (Intercept) 2.302e-13 7.481e+00 0.000 1.000
## CountrySAF -2.087e-13 7.935e+00 0.000 1.000
## CountryUGA -2.168e-13 8.195e+00 0.000 1.000
## CountryURT 1.142e+00 8.080e+00 0.141 0.888
## CountrySWA -2.309e-13 1.058e+01 0.000 1.000
## CountrySEN -2.346e-13 7.726e+00 0.000 1.000
## CountryZAI -2.390e-13 1.058e+01 0.000 1.000
## CountryMOZ 1.000e+00 9.162e+00 0.109 0.913
## CountryMLI -2.276e-13 7.686e+00 0.000 1.000
## CountryKEN 1.042e-01 7.786e+00 0.013 0.989
## CountryETH 4.400e-01 1.058e+01 0.042 0.967
## CountryGUI -2.317e-13 7.726e+00 0.000 1.000
## CountryGHA -2.330e-13 7.686e+00 0.000 1.000
## CountryBKF 6.536e+00 7.567e+00 0.864 0.389
## CountryZIM -2.336e-13 7.846e+00 0.000 1.000
##
## (Dispersion parameter for gaussian family taken to be 55.96374)
##
## Null deviance: 9193.0 on 155 degrees of freedom
## Residual deviance: 7890.9 on 141 degrees of freedom
## AIC: 1086.8
##
## Number of Fisher Scoring iterations: 2

data$Country <- relevel(data$Country, ref= "ZIM")
model1<-glm((Prev_TvTsg) ~ Country,data=data, family=gaussian())
summary(model1)

##
## Call:
## glm(formula = (Prev_TvTsg) ~ Country, family = gaussian(), data = data)
##
## Deviance Residuals:
## Min 1Q Median 3Q Max
## -6.536 -0.104 0.000 0.000 60.134
##
## Coefficients:
## Estimate Std. Error t value Pr(>|t|)
## (Intercept) -2.773e-15 2.366e+00 0.000 1.000
## CountryZAM -6.818e-14 7.846e+00 0.000 1.000
## CountrySAF -1.283e-14 3.548e+00 0.000 1.000
## CountryUGA -7.956e-16 4.097e+00 0.000 1.000
## CountryURT 1.142e+00 3.863e+00 0.296 0.768
## CountrySWA 7.575e-15 7.846e+00 0.000 1.000
## CountrySEN 2.589e-15 3.054e+00 0.000 1.000
## CountryZAI -2.430e-14 7.846e+00 0.000 1.000
## CountryMOZ 1.000e+00 5.795e+00 0.173 0.863
## CountryMLI 1.225e-14 2.951e+00 0.000 1.000
## CountryKEN 1.042e-01 3.203e+00 0.033 0.974
## CountryETH 4.400e-01 7.846e+00 0.056 0.955
## CountryGUI -3.846e-15 3.054e+00 0.000 1.000
## CountryGHA 8.723e-15 2.951e+00 0.000 1.000
## CountryBKF 6.536e+00 2.626e+00 2.489 0.014 *
## ---
## Signif. codes: 0 '***' 0.001 '**' 0.01 '*' 0.05 '.' 0.1 ' ' 1
##
## (Dispersion parameter for gaussian family taken to be 55.96374)
##
## Null deviance: 9193.0 on 155 degrees of freedom
## Residual deviance: 7890.9 on 141 degrees of freedom
## AIC: 1086.8
##
## Number of Fisher Scoring iterations: 2

#======== Glm TzTsg per country
data$Country <- relevel(data$Country, ref= "BKF")
model1<-glm((Prev_TzTsg) ~ Country,data=data, family=gaussian())
summary(model1)

##
## Call:
## glm(formula = (Prev_TzTsg) ~ Country, family = gaussian(), data = data)
##
## Deviance Residuals:
## Min 1Q Median 3Q Max
## -1.8402 -0.8751 0.0000 0.0000 31.4898
##
## Coefficients:
## Estimate Std. Error t value Pr(>|t|)
## (Intercept) 1.8402 0.5987 3.074 0.00254 **
## CountryZIM -1.8402 1.3784 -1.335 0.18401
## CountryZAM -1.8402 3.9716 -0.463 0.64383
## CountrySAF -1.8402 1.5117 -1.217 0.22552
## CountryUGA -1.8402 1.8551 -0.992 0.32291
## CountryURT -1.2869 1.7110 -0.752 0.45323
## CountrySWA -1.8402 3.9716 -0.463 0.64383
## CountrySEN -1.8402 1.1773 -1.563 0.12029
## CountryZAI -1.8402 3.9716 -0.463 0.64383
## CountryMOZ -1.8402 2.8401 -0.648 0.51807
## CountryMLI -1.8402 1.1022 -1.670 0.09722 .
## CountryKEN -1.5652 1.2818 -1.221 0.22408
## CountryETH -1.1902 3.9716 -0.300 0.76486
## CountryGUI -1.8402 1.1773 -1.563 0.12029
## CountryGHA -1.8402 1.1022 -1.670 0.09722 .
## ---
## Signif. codes: 0 '***' 0.001 '**' 0.01 '*' 0.05 '.' 0.1 ' ' 1
##
## (Dispersion parameter for gaussian family taken to be 15.41486)
##
## Null deviance: 2274.4 on 155 degrees of freedom
## Residual deviance: 2173.5 on 141 degrees of freedom
## AIC: 885.65
##
## Number of Fisher Scoring iterations: 2

data$Country <- relevel(data$Country, ref= "GHA")
model1<-glm((Prev_TzTsg) ~ Country,data=data, family=gaussian())
summary(model1)

##
## Call:
## glm(formula = (Prev_TzTsg) ~ Country, family = gaussian(), data = data)
##
## Deviance Residuals:
## Min 1Q Median 3Q Max
## -1.8402 -0.8751 0.0000 0.0000 31.4898
##
## Coefficients:
## Estimate Std. Error t value Pr(>|t|)
## (Intercept) 1.778e-15 9.254e-01 0.000 1.0000
## CountryBKF 1.840e+00 1.102e+00 1.670 0.0972 .
## CountryZIM 2.017e-15 1.549e+00 0.000 1.0000
## CountryZAM -1.941e-15 4.034e+00 0.000 1.0000
## CountrySAF -1.194e-15 1.668e+00 0.000 1.0000
## CountryUGA -1.697e-15 1.985e+00 0.000 1.0000
## CountryURT 5.533e-01 1.851e+00 0.299 0.7654
## CountrySWA -2.506e-15 4.034e+00 0.000 1.0000
## CountrySEN -1.966e-15 1.373e+00 0.000 1.0000
## CountryZAI -1.072e-15 4.034e+00 0.000 1.0000
## CountryMOZ 1.358e-16 2.926e+00 0.000 1.0000
## CountryMLI -3.025e-15 1.309e+00 0.000 1.0000
## CountryKEN 2.750e-01 1.463e+00 0.188 0.8512
## CountryETH 6.500e-01 4.034e+00 0.161 0.8722
## CountryGUI -1.650e-15 1.373e+00 0.000 1.0000
## ---
## Signif. codes: 0 '***' 0.001 '**' 0.01 '*' 0.05 '.' 0.1 ' ' 1
##
## (Dispersion parameter for gaussian family taken to be 15.41486)
##
## Null deviance: 2274.4 on 155 degrees of freedom
## Residual deviance: 2173.5 on 141 degrees of freedom
## AIC: 885.65
##
## Number of Fisher Scoring iterations: 2

data$Country <- relevel(data$Country, ref= "GUI")
model1<-glm((Prev_TzTsg) ~ Country,data=data, family=gaussian())
summary(model1)

##
## Call:
## glm(formula = (Prev_TzTsg) ~ Country, family = gaussian(), data = data)
##
## Deviance Residuals:
## Min 1Q Median 3Q Max
## -1.8402 -0.8751 0.0000 0.0000 31.4898
##
## Coefficients:
## Estimate Std. Error t value Pr(>|t|)
## (Intercept) 7.092e-16 1.014e+00 0.000 1.000
## CountryGHA -2.448e-15 1.373e+00 0.000 1.000
## CountryBKF 1.840e+00 1.177e+00 1.563 0.120
## CountryZIM -2.792e-16 1.603e+00 0.000 1.000
## CountryZAM -2.010e-16 4.055e+00 0.000 1.000
## CountrySAF 7.995e-16 1.719e+00 0.000 1.000
## CountryUGA -1.490e-15 2.027e+00 0.000 1.000
## CountryURT 5.533e-01 1.897e+00 0.292 0.771
## CountrySWA 1.732e-16 4.055e+00 0.000 1.000
## CountrySEN 5.485e-16 1.434e+00 0.000 1.000
## CountryZAI -1.067e-15 4.055e+00 0.000 1.000
## CountryMOZ -8.111e-16 2.956e+00 0.000 1.000
## CountryMLI -5.870e-16 1.373e+00 0.000 1.000
## CountryKEN 2.750e-01 1.521e+00 0.181 0.857
## CountryETH 6.500e-01 4.055e+00 0.160 0.873
##
## (Dispersion parameter for gaussian family taken to be 15.41486)
##
## Null deviance: 2274.4 on 155 degrees of freedom
## Residual deviance: 2173.5 on 141 degrees of freedom
## AIC: 885.65
##
## Number of Fisher Scoring iterations: 2

data$Country <- relevel(data$Country, ref= "ETH")
model1<-glm((Prev_TzTsg) ~ Country,data=data, family=gaussian())
summary(model1)

##
## Call:
## glm(formula = (Prev_TzTsg) ~ Country, family = gaussian(), data = data)
##
## Deviance Residuals:
## Min 1Q Median 3Q Max
## -1.8402 -0.8751 0.0000 0.0000 31.4898
##
## Coefficients:
## Estimate Std. Error t value Pr(>|t|)
## (Intercept) 0.65000 3.92618 0.166 0.869
## CountryGUI -0.65000 4.05494 -0.160 0.873
## CountryGHA -0.65000 4.03376 -0.161 0.872
## CountryBKF 1.19023 3.97157 0.300 0.765
## CountryZIM -0.65000 4.11781 -0.158 0.875
## CountryZAM -0.65000 5.55245 -0.117 0.907
## CountrySAF -0.65000 4.16434 -0.156 0.876
## CountryUGA -0.65000 4.30091 -0.151 0.880
## CountryURT -0.09667 4.24076 -0.023 0.982
## CountrySWA -0.65000 5.55245 -0.117 0.907
## CountrySEN -0.65000 4.05494 -0.160 0.873
## CountryZAI -0.65000 5.55245 -0.117 0.907
## CountryMOZ -0.65000 4.80856 -0.135 0.893
## CountryMLI -0.65000 4.03376 -0.161 0.872
## CountryKEN -0.37500 4.08649 -0.092 0.927
##
## (Dispersion parameter for gaussian family taken to be 15.41486)
##
## Null deviance: 2274.4 on 155 degrees of freedom
## Residual deviance: 2173.5 on 141 degrees of freedom
## AIC: 885.65
##
## Number of Fisher Scoring iterations: 2

data$Country <- relevel(data$Country, ref= "KEN")
model1<-glm((Prev_TzTsg) ~ Country,data=data, family=gaussian())
summary(model1)

##
## Call:
## glm(formula = (Prev_TzTsg) ~ Country, family = gaussian(), data = data)
##
## Deviance Residuals:
## Min 1Q Median 3Q Max
[truncated: 343,559 more chars]
